# Supplementary material for: Co-inoculum of Beauveria brongniartii and B. bassiana shows in vitro different metabolic behaviour in comparison to single inoculums
Source: PubMed Central journal article supplement (PMC5638874; doi:10.1038/s41598-017-12700-0), 2017-10-12

# **Co-inoculum of *Beauveria brongniartii* and *B. bassiana* shows in vitro different metabolic behaviour in comparison to single inoculums**

Canfora L.<sup>1</sup>, Abu Samra N.<sup>1§</sup>, Tartanus M.<sup>2</sup>, Łabanowska B.H.<sup>2</sup>, Benedetti A.<sup>1</sup>, Pinzari F.<sup>1,3\*</sup> and Malusà E.<sup>2,4</sup>

<sup>1</sup>Council for Agricultural Research and Economics, Research Centre for Agriculture and Environment, Via della Navicella 2-4, 00184 Rome, Italy

<sup>2</sup>Research Institute of Horticulture, Konstytucji 3 Maja 1, 96-100 Skierniewice, Poland

<sup>3</sup>Department of Life Sciences, Natural History Museum, Cromwell Road, SW7 5BD London, UK

<sup>4</sup>Council for Agricultural Research and Economics, Research Centre for Engineering and Agro-Food Processing, Strada delle Cacce 73, 10135 Torino, Italy

§ current address: Cirad - av. Agropolis - Génétique et innovation variétale (GIV). TA A-108/01 - 34398 Montpellier Cedex 5 – France

\*Corresponding author

## **Supplementary Information:**

**Tables: S1, S2, S3, S4, S5**

**Figures: S1, S2, S3 (=a series of 96 plots)**

**Table S1.** One-sided test Hypothesis: CO metabolism larger than BA or BR. Simultaneous Tests for General Linear Hypotheses. OD 490nm.

| Linear Hypotheses:  |    |   |    |      | Estimate | Std. Error | t value | Pr(>t) |          |     |
|---------------------|----|---|----|------|----------|------------|---------|--------|----------|-----|
| B04-Erythritol      | CO | - | BA | <= 0 | 158.45   | 16.3       | 9.719   | <      | 1.00E-04 | *** |
|                     | CO | - | BR | <= 0 | 163.78   | 16.3       | 10.046  | <      | 1.00E-04 | *** |
| D03-D-Melezitose    | CO | - | BA | <= 0 | 102.76   | 16.3       | 6.303   | <      | 1.00E-04 | *** |
|                     | CO | - | BR | <= 0 | 219.64   | 16.3       | 13.473  | <      | 1.00E-04 | *** |
| E04-D-Sorbitol      | CO | - | BA | <= 0 | 50.19    | 16.3       | 3.079   |        | 0.02217  | *   |
|                     | CO | - | BR | <= 0 | 203.7    | 16.3       | 12.495  | <      | 1.00E-04 | *** |
| G10-L-Asparagine    | CO | - | BA | <= 0 | 160.13   | 16.3       | 9.822   | <      | 1.00E-04 | *** |
|                     | CO | - | BR | <= 0 | 287.01   | 16.3       | 17.605  | <      | 1.00E-04 | *** |
| G11-L-Aspartic Acid | CO | - | BA | <= 0 | 45.8     | 16.3       | 2.809   |        | 0.04353  | *   |
|                     | CO | - | BR | <= 0 | 171.88   | 16.3       | 10.543  | <      | 1.00E-04 | *** |
| G12-Glutamic Acid   | CO | - | BA | <= 0 | 62.31    | 16.3       | 3.822   |        | 0.00293  | **  |
|                     | CO | - | BR | <= 0 | 172.8    | 16.3       | 10.599  | <      | 1.00E-04 | *** |

Signif. codes: 0 '\*\*\*', 0.001 '\*\*', 0.01 '\*', 0.05 '.', 0.1 ' ', 1. (Adjusted p values reported -- single-step method)

**Table S2.** One-sided Test. Hypothesis: CO growth larger than that of BA or BR. Simultaneous Tests for General Linear Hypotheses. OD 750nm.

| Hypotheses:         |    |   |    |    |          |            |         |        |   |          |     |
|---------------------|----|---|----|----|----------|------------|---------|--------|---|----------|-----|
|                     |    |   |    |    | Estimate | Std. Error | t value | Pr(>t) |   |          |     |
| B04-Erythritol      | CO | - | BA | <= | 0        | 154.94     | 12.94   | 11.975 | < | 1.00E-04 | *** |
|                     | CO | - | BR | <= | 0        | 154.59     | 12.94   | 11.949 | < | 1.00E-04 | *** |
| D03-D-Melezitose    | CO | - | BA | <= | 0        | 96.36      | 12.94   | 7.448  | < | 1.00E-04 | *** |
|                     | CO | - | BR | <= | 0        | 204.51     | 12.94   | 15.807 | < | 1.00E-04 | *** |
| E04-D-Sorbitol      | CO | - | BA | <= | 0        | 45.67      | 12.94   | 3.53   |   | 0.00665  | **  |
|                     | CO | - | BR | <= | 0        | 187.01     | 12.94   | 14.454 | < | 1.00E-04 | *** |
| G10-L-Asparagine    | CO | - | BA | <= | 0        | 101.06     | 12.94   | 7.811  | < | 1.00E-04 | *** |
|                     | CO | - | BR | <= | 0        | 153.59     | 12.94   | 11.871 | < | 1.00E-04 | *** |
| G11-L-Aspartic Acid | CO | - | BA | <= | 0        | 10.99      | 12.94   | 0.85   |   | 0.89011  |     |
|                     | CO | - | BR | <= | 0        | 45.05      | 12.94   | 3.482  |   | 0.00758  | **  |
| G12-Glutamic Acid   | CO | - | BA | <= | 0        | 26.41      | 12.94   | 2.041  |   | 0.22892  |     |
|                     | CO | - | BR | <= | 0        | 78.01      | 12.94   | 6.03   | < | 1.00E-04 | *** |

Signif. codes: 0 '\*\*\*', 0.001 '\*\*', 0.01 '\*', 0.05 '.', 0.1 ' ', 1. (Adjusted p values reported -- single-step method)

**Table S3.** Two-sided Test Hypothesis: CO BA BR different. Simultaneous Tests for General Linear Hypotheses. OD 490nm. Multiple Comparisons of Means: User-defined Contrasts.

| Hypotheses:                      |    |   |    |     | Estimate | Std. Error | t value | Pr(>t)  |     |
|----------------------------------|----|---|----|-----|----------|------------|---------|---------|-----|
| A08-D-Arabinose                  | BR | - | BA | = 0 | 28.842   | 16.369     | 1.762   | 0.915   |     |
|                                  | CO | - | BA | = 0 | -1.925   | 16.369     | -0.118  | 1.000   |     |
|                                  | CO | - | BR | = 0 | -30.767  | 16.369     | -1.88   | 0.856   |     |
| A10-D-Arabitol                   | BR | - | BA | = 0 | -75.816  | 16.369     | -4.632  | 0.001   | *** |
|                                  | CO | - | BA | = 0 | -11.398  | 16.369     | -0.696  | 1.000   |     |
|                                  | CO | - | BR | = 0 | 64.418   | 16.369     | 3.935   | 0.007   | **  |
| A11-Arbutin                      | BR | - | BA | = 0 | -49.474  | 16.369     | -3.022  | 0.112   |     |
|                                  | CO | - | BA | = 0 | -30.813  | 16.369     | -1.882  | 0.855   |     |
|                                  | CO | - | BR | = 0 | 18.661   | 16.369     | 1.14    | 1.000   |     |
| A12-D-Cellobiose                 | BR | - | BA | = 0 | -189.558 | 16.369     | -11.581 | < 0.000 | *** |
|                                  | CO | - | BA | = 0 | -17.52   | 16.369     | -1.07   | 1.000   |     |
|                                  | CO | - | BR | = 0 | 172.038  | 16.369     | 10.51   | < 0.000 | *** |
| C07-2-Keto-D-Gluconic Acid       | BR | - | BA | = 0 | 122.241  | 16.369     | 7.468   | < 0.000 | *** |
|                                  | CO | - | BA | = 0 | 49.966   | 16.369     | 3.053   | 0.103   |     |
|                                  | CO | - | BR | = 0 | -72.275  | 16.369     | -4.415  | 0.001   | **  |
| C08- $\alpha$ -D-Lactose         | BR | - | BA | = 0 | -73.72   | 16.369     | -4.504  | 0.001   | *** |
|                                  | CO | - | BA | = 0 | 12.939   | 16.369     | 0.79    | 1.000   |     |
|                                  | CO | - | BR | = 0 | 86.659   | 16.369     | 5.294   | < 0.000 | *** |
| D08- $\beta$ -Methyl-D-Glucoside | BR | - | BA | = 0 | -163.698 | 16.369     | -10.001 | < 0.000 | *** |
|                                  | CO | - | BA | = 0 | -10.301  | 16.369     | -0.629  | 1.000   |     |
|                                  | CO | - | BR | = 0 | 153.397  | 16.369     | 9.371   | < 0.000 | *** |
| E06-Stachynose                   | BR | - | BA | = 0 | -155.953 | 16.369     | -9.528  | < 0.000 | *** |
|                                  | CO | - | BA | = 0 | 2.725    | 16.369     | 0.166   | 1.000   |     |
|                                  | CO | - | BR | = 0 | 158.679  | 16.369     | 9.694   | < 0.000 | *** |
| F06-p-Hydroxyphenyl-acetic acid  | BR | - | BA | = 0 | 15.838   | 16.369     | 0.968   | 1.000   |     |
|                                  | CO | - | BA | = 0 | -3.81    | 16.369     | -0.233  | 1.000   |     |
|                                  | CO | - | BR | = 0 | -19.648  | 16.369     | -1.2    | 0.999   |     |
| G06-N-Acetyly-L-Glutamic Acid    | BR | - | BA | = 0 | 87.302   | 16.369     | 5.333   | < 0.000 | *** |
|                                  | CO | - | BA | = 0 | 41.233   | 16.369     | 2.519   | 0.364   |     |
|                                  | CO | - | BR | = 0 | -46.069  | 16.369     | -2.814  | 0.190   |     |
| H03-L-Phenylalanine              | BR | - | BA | = 0 | -64.796  | 16.369     | -3.959  | 0.006   | **  |
|                                  | CO | - | BA | = 0 | -33.269  | 16.369     | -2.032  | 0.754   |     |
|                                  | CO | - | BR | = 0 | 31.526   | 16.369     | 1.926   | 0.828   |     |
| H10-Adenosine                    | BR | - | BA | = 0 | 17.833   | 16.369     | 1.089   | 1.000   |     |
|                                  | CO | - | BA | = 0 | -1.154   | 16.369     | -0.071  | 1.000   |     |
|                                  | CO | - | BR | = 0 | -18.988  | 16.369     | -1.16   | 1.000   |     |
| H11-Uridine                      | BR | - | BA | = 0 | 33.579   | 16.369     | 2.051   | 0.739   |     |
|                                  | CO | - | BA | = 0 | 3.126    | 16.369     | 0.191   | 1.000   |     |
|                                  | CO | - | BR | = 0 | -30.453  | 16.369     | -1.86   | 0.867   |     |
| A08-D-Arabinose                  | BR | - | BA | = 0 | 28.842   | 16.369     | 1.762   | 0.915   |     |

---

|    |   |    |   |   |         |        |        |       |
|----|---|----|---|---|---------|--------|--------|-------|
| CO | - | BA | = | 0 | -1.925  | 16.369 | -0.118 | 1.000 |
| CO | - | BR | = | 0 | -30.767 | 16.369 | -1.88  | 0.856 |

---

Signif. codes: 0 '\*\*\*', 0.001 '\*\*', 0.01 '\*', 0.05 '.', 0.1 ' ', 1. (Adjusted p values reported -- single-step method)

**Table S4.** Two-sided Test Hypothesis: CO BA BR different. Simultaneous Tests for General Linear Hypotheses. OD 750nm. Multiple Comparisons of Means: User-defined Contrasts.

|                                  |             | <b>Hypotheses:</b> |                   |                |                  |
|----------------------------------|-------------|--------------------|-------------------|----------------|------------------|
|                                  |             | <b>Estimate</b>    | <b>Std. Error</b> | <b>t value</b> | <b>Pr(&gt;t)</b> |
| A08-D-Arabinose                  | BR - BA = 0 | 18.935             | 13.186            | 1.436          | 0.991            |
|                                  | CO - BA = 0 | -1.284             | 13.186            | -0.097         | 1.000            |
|                                  | CO - BR = 0 | -20.218            | 13.186            | -1.533         | 0.979            |
| A10-D-Arabitol                   | BR - BA = 0 | -45.445            | 13.186            | -3.446         | 0.033 *          |
|                                  | CO - BA = 0 | -0.878             | 13.186            | -0.067         | 1.000            |
|                                  | CO - BR = 0 | 44.567             | 13.186            | 3.380          | 0.040 *          |
| A11-Arbutin                      | BR - BA = 0 | -7.273             | 13.186            | -0.552         | 1.000            |
|                                  | CO - BA = 0 | -6.353             | 13.186            | -0.482         | 1.000            |
|                                  | CO - BR = 0 | 0.920              | 13.186            | 0.070          | 1.000            |
| A12-D-Cellobiose                 | BR - BA = 0 | -186.252           | 13.186            | -14.125        | < 0.000 ***      |
|                                  | CO - BA = 0 | -12.156            | 13.186            | -0.922         | 1.000            |
|                                  | CO - BR = 0 | 174.097            | 13.186            | 13.203         | < 0.000 ***      |
| C07-2-Keto-D-Gluconic Acid       | BR - BA = 0 | 16.649             | 13.186            | 1.263          | 0.998            |
|                                  | CO - BA = 0 | 28.605             | 13.186            | 2.169          | 0.645            |
|                                  | CO - BR = 0 | 11.956             | 13.186            | 0.907          | 1.000            |
| C08- $\alpha$ -D-Lactose         | BR - BA = 0 | -70.300            | 13.186            | -5.331         | < 0.000 ***      |
|                                  | CO - BA = 0 | 14.923             | 13.186            | 1.132          | 1.000            |
|                                  | CO - BR = 0 | 85.223             | 13.186            | 6.463          | < 0.000 ***      |
| D08- $\beta$ -Methyl-D-Glucoside | BR - BA = 0 | -157.446           | 13.186            | -11.940        | < 0.000 ***      |
|                                  | CO - BA = 0 | -8.189             | 13.186            | -0.621         | 1.000            |
|                                  | CO - BR = 0 | 149.257            | 13.186            | 11.319         | < 0.000 ***      |
| E06-Stachynose                   | BR - BA = 0 | -145.328           | 13.186            | -11.021        | < 0.000 ***      |
|                                  | CO - BA = 0 | 13.852             | 13.186            | 1.051          | 1.000            |
|                                  | CO - BR = 0 | 159.181            | 13.186            | 12.072         | < 0.000 ***      |
| F06-p-Hydroxyphenyl-acetic acid  | BR - BA = 0 | 25.955             | 13.186            | 1.968          | 0.800            |
|                                  | CO - BA = 0 | -0.715             | 13.186            | -0.054         | 1.000            |
|                                  | CO - BR = 0 | -26.670            | 13.186            | -2.023         | 0.761            |
| G06-N-Acetyly-L-Glutamic Acid    | BR - BA = 0 | 47.140             | 13.186            | 3.575          | 0.022 *          |
|                                  | CO - BA = 0 | 22.603             | 13.186            | 1.714          | 0.934            |
|                                  | CO - BR = 0 | -24.537            | 13.186            | -1.861         | 0.867            |
| H03-L-Phenylalanine              | BR - BA = 0 | 4.115              | 13.186            | 0.312          | 1.000            |
|                                  | CO - BA = 0 | -2.061             | 13.186            | -0.156         | 1.000            |
|                                  | CO - BR = 0 | -6.176             | 13.186            | -0.468         | 1.000            |
| H10-Adenosine                    | BR - BA = 0 | 20.661             | 13.186            | 1.567          | 0.973            |
|                                  | CO - BA = 0 | -3.877             | 13.186            | -0.294         | 1.000            |
|                                  | CO - BR = 0 | -24.538            | 13.186            | -1.861         | 0.867            |
| H11-Uridine                      | BR - BA = 0 | 23.678             | 13.186            | 1.796          | 0.900            |
|                                  | CO - BA = 0 | 0.393              | 13.186            | 0.030          | 1.000            |
|                                  | CO - BR = 0 | -23.285            | 13.186            | -1.766         | 0.914            |
| A08-D-Arabinose                  | BR - BA = 0 | 18.935             | 13.186            | 1.436          | 0.991            |

---

|             |         |        |        |       |
|-------------|---------|--------|--------|-------|
| CO - BA = 0 | -1.284  | 13.186 | -0.097 | 1.000 |
| CO - BR = 0 | -20.218 | 13.186 | -1.533 | 0.979 |

---

Signif. codes: 0 '\*\*\*', 0.001 '\*\*', 0.01 '\*', 0.05 '.', 0.1 ' ', 1. (Adjusted p values reported -- single-step method)

**Table S5.** Kendall's tau coefficient used to measure the ordinal association between respiration (OD 490) and growth (OD 750 nm) data. The colour gradient is used in the table to graphically represent the degree of correlation between growth and respiration (green=low degree, red=high degree).

| Substrate                 | tau CO | 2-sided p-value | tau BA | 2-sided p-value | tau BR | 2-sided p-value |
|---------------------------|--------|-----------------|--------|-----------------|--------|-----------------|
| A.Cyclodextrin            | 0.695  | <2.22e-16       | 0.788  | <2.22e-16       | 0.639  | <2.22e-16       |
| a.D.Glucose               | 0.886  | <2.22e-16       | 0.949  | <2.22e-16       | 0.968  | <2.22e-16       |
| a.D.Lactose               | 0.98   | <2.22e-16       | 0.976  | <2.22e-16       | 0.896  | <2.22e-16       |
| A.Keto.glutaricAcid       | 0.868  | <2.22e-16       | 0.846  | <2.22e-16       | 0.912  | <2.22e-16       |
| a.Methyl.D.Galactoside    | 0.769  | <2.22e-16       | 0.826  | <2.22e-16       | 0.575  | 3.58E-07        |
| a.Methyl.D.Glucoside      | 0.729  | <2.22e-16       | 0.743  | <2.22e-16       | 0.537  | 1.67E-06        |
| Adenosine                 | 0.681  | <2.22e-16       | 0.741  | <2.22e-16       | 0.293  | 0.0089771       |
| Adenosine.5.Monophosphate | 0.783  | <2.22e-16       | 0.756  | <2.22e-16       | 0.692  | <2.22e-16       |
| Adonitol                  | 0.894  | <2.22e-16       | 0.959  | <2.22e-16       | 0.895  | <2.22e-16       |
| Alaninamide               | 0.729  | <2.22e-16       | 0.751  | <2.22e-16       | 0.64   | <2.22e-16       |
| Amygdalin                 | 0.816  | <2.22e-16       | 0.87   | <2.22e-16       | 0.957  | <2.22e-16       |
| Arbutin                   | 0.795  | <2.22e-16       | 0.861  | <2.22e-16       | 0.978  | <2.22e-16       |
| b.Cyclodextrin            | 0.756  | <2.22e-16       | 0.786  | <2.22e-16       | 0.61   | <2.22e-16       |
| B.Hydroxy.butyricAcid     | 0.825  | <2.22e-16       | 0.792  | <2.22e-16       | 0.765  | <2.22e-16       |
| b.Methyl.D.Galactoside    | 0.828  | <2.22e-16       | 0.828  | <2.22e-16       | 0.861  | <2.22e-16       |
| b.Methyl.D.Glucoside      | 0.884  | <2.22e-16       | 0.93   | <2.22e-16       | 0.978  | <2.22e-16       |
| BromosuccinicAcid         | 0.822  | <2.22e-16       | 0.772  | <2.22e-16       | 0.885  | <2.22e-16       |
| D.Arabinose               | 0.773  | <2.22e-16       | 0.797  | <2.22e-16       | 0.872  | <2.22e-16       |
| D.Arabitol                | 0.975  | <2.22e-16       | 0.972  | <2.22e-16       | 0.946  | <2.22e-16       |
| D.Cellobiose              | 0.874  | <2.22e-16       | 0.87   | <2.22e-16       | 0.968  | <2.22e-16       |
| D.Fructose                | 0.962  | <2.22e-16       | 0.97   | <2.22e-16       | 0.949  | <2.22e-16       |
| D.Galactose               | 0.967  | <2.22e-16       | 0.975  | <2.22e-16       | 0.982  | <2.22e-16       |
| D.GalacturonicAcid        | 0.835  | <2.22e-16       | 0.834  | <2.22e-16       | 0.83   | <2.22e-16       |
| D.GluconicAcid            | 0.837  | <2.22e-16       | 0.862  | <2.22e-16       | 0.866  | <2.22e-16       |
| D.Glucosamine             | 0.933  | <2.22e-16       | 0.934  | <2.22e-16       | 0.894  | <2.22e-16       |
| D.GlucuronicAcid          | 0.802  | <2.22e-16       | 0.746  | <2.22e-16       | 0.606  | 1.19E-07        |
| D.LacticAcidMethylEster   | 0.662  | <2.22e-16       | 0.685  | <2.22e-16       | 0.618  | <2.22e-16       |
| D.MalicAcid               | 0.959  | <2.22e-16       | 0.914  | <2.22e-16       | 0.854  | <2.22e-16       |
| D.Mannitol                | 0.866  | <2.22e-16       | 0.866  | <2.22e-16       | 0.916  | <2.22e-16       |
| D.MannitolBA              | 0.916  | <2.22e-16       | 0.973  | <2.22e-16       | 0.973  | <2.22e-16       |
| D.Mannose                 | 0.791  | <2.22e-16       | 0.897  | <2.22e-16       | 0.981  | <2.22e-16       |
| D.Melezitose              | 0.957  | <2.22e-16       | 0.954  | <2.22e-16       | 0.507  | 5.96E-06        |
| D.Melibiose               | 0.97   | <2.22e-16       | 0.98   | <2.22e-16       | 0.583  | 2.38E-07        |
| D.Psicose                 | 0.816  | <2.22e-16       | 0.816  | <2.22e-16       | 0.723  | <2.22e-16       |
| D.Raffinose               | 0.727  | <2.22e-16       | 0.894  | <2.22e-16       | 0.968  | <2.22e-16       |
| D.Ribose                  | 0.951  | <2.22e-16       | 0.964  | <2.22e-16       | 0.948  | <2.22e-16       |
| D.SaccharinAcid           | 0.616  | <2.22e-16       | 0.636  | <2.22e-16       | 0.471  | 2.68E-05        |
| D.Sorbitol                | 0.808  | <2.22e-16       | 0.889  | <2.22e-16       | 0.922  | <2.22e-16       |
| D.Tagatose                | 0.709  | <2.22e-16       | 0.691  | <2.22e-16       | 0.623  | <2.22e-16       |
| D.Trehalose               | 0.826  | <2.22e-16       | 0.914  | <2.22e-16       | 0.976  | <2.22e-16       |
| D.Xylose                  | 0.947  | <2.22e-16       | 0.949  | <2.22e-16       | 0.943  | <2.22e-16       |



|                            |       |           |       |           |       |           |
|----------------------------|-------|-----------|-------|-----------|-------|-----------|
| Dextrin                    | 0.913 | <2.22e-16 | 0.928 | <2.22e-16 | 0.941 | <2.22e-16 |
| FumaricAcid                | 0.972 | <2.22e-16 | 0.868 | <2.22e-16 | 0.887 | <2.22e-16 |
| G.Amino.butyricAcid        | 0.811 | <2.22e-16 | 0.826 | <2.22e-16 | 0.897 | <2.22e-16 |
| G.Hydroxy.butyricAcid      | 0.773 | <2.22e-16 | 0.773 | <2.22e-16 | 0.654 | <2.22e-16 |
| Gentibiose                 | 0.727 | <2.22e-16 | 0.88  | <2.22e-16 | 0.989 | <2.22e-16 |
| Glucose.1.Phophate         | 0.951 | <2.22e-16 | 0.959 | <2.22e-16 | 0.897 | <2.22e-16 |
| Glucuronamide              | 0.684 | <2.22e-16 | 0.687 | <2.22e-16 | 0.67  | <2.22e-16 |
| Glycerol                   | 0.836 | <2.22e-16 | 0.803 | <2.22e-16 | 0.964 | <2.22e-16 |
| Glycogen                   | 0.96  | <2.22e-16 | 0.976 | <2.22e-16 | 0.943 | <2.22e-16 |
| Glycyl.L.GlutamicAcid      | 0.892 | <2.22e-16 | 0.93  | <2.22e-16 | 0.927 | <2.22e-16 |
| I.Erythritol               | 0.968 | <2.22e-16 | 0.921 | <2.22e-16 | 0.943 | <2.22e-16 |
| L.Alanine                  | 0.895 | <2.22e-16 | 0.9   | <2.22e-16 | 0.943 | <2.22e-16 |
| L.Alanyl.Glycine           | 0.957 | <2.22e-16 | 0.959 | <2.22e-16 | 0.935 | <2.22e-16 |
| L.Arabinose                | 0.984 | <2.22e-16 | 0.981 | <2.22e-16 | 0.911 | <2.22e-16 |
| L.Asparagine               | 0.938 | <2.22e-16 | 0.943 | <2.22e-16 | 0.875 | <2.22e-16 |
| L.AsparticAcid             | 0.899 | <2.22e-16 | 0.938 | <2.22e-16 | 0.924 | <2.22e-16 |
| L.Fucose                   | 0.749 | <2.22e-16 | 0.673 | <2.22e-16 | 0.841 | <2.22e-16 |
| L.GlutamicAcid             | 0.96  | <2.22e-16 | 0.959 | <2.22e-16 | 0.953 | <2.22e-16 |
| L.LacticAcid               | 0.735 | <2.22e-16 | 0.735 | <2.22e-16 | 0.674 | <2.22e-16 |
| L.LacticAcidBA             | 0.674 | <2.22e-16 | 0.613 | <2.22e-16 | 0.613 | <2.22e-16 |
| L.MalicAcid                | 0.9   | <2.22e-16 | 0.868 | <2.22e-16 | 0.903 | <2.22e-16 |
| L.Ornithine                | 0.924 | <2.22e-16 | 0.783 | <2.22e-16 | 0.791 | <2.22e-16 |
| L.Phenylalanine            | 0.787 | <2.22e-16 | 0.856 | <2.22e-16 | 0.538 | 1.55E-06  |
| L.Proline                  | 0.935 | <2.22e-16 | 0.907 | <2.22e-16 | 0.926 | <2.22e-16 |
| L.PyroglutamicAcid         | 0.897 | <2.22e-16 | 0.842 | <2.22e-16 | 0.932 | <2.22e-16 |
| L.Rhamnose                 | 0.738 | <2.22e-16 | 0.754 | <2.22e-16 | 0.538 | 1.55E-06  |
| L.Serine                   | 0.9   | <2.22e-16 | 0.903 | <2.22e-16 | 0.903 | <2.22e-16 |
| L.Sorbose                  | 0.8   | <2.22e-16 | 0.937 | <2.22e-16 | 0.691 | <2.22e-16 |
| L.Threonine                | 0.747 | <2.22e-16 | 0.727 | <2.22e-16 | 0.689 | <2.22e-16 |
| Lactulose                  | 0.914 | <2.22e-16 | 0.9   | <2.22e-16 | 0.808 | <2.22e-16 |
| m.Inositol                 | 0.927 | <2.22e-16 | 0.935 | <2.22e-16 | 0.935 | <2.22e-16 |
| Maltitol                   | 0.809 | <2.22e-16 | 0.793 | <2.22e-16 | 0.716 | <2.22e-16 |
| Maltose                    | 0.906 | <2.22e-16 | 0.929 | <2.22e-16 | 0.97  | <2.22e-16 |
| Maltotriose                | 0.867 | <2.22e-16 | 0.875 | <2.22e-16 | 0.974 | <2.22e-16 |
| N.Acetyl.D.Galactosamine   | 0.818 | <2.22e-16 | 0.791 | <2.22e-16 | 0.452 | 5.58E-05  |
| N.Acetyl.D.Glucosamine     | 0.967 | <2.22e-16 | 0.967 | <2.22e-16 | 0.972 | <2.22e-16 |
| N.Acetyl.D.Mannosamine     | 0.793 | <2.22e-16 | 0.743 | <2.22e-16 | 0.5   | 8.46E-06  |
| N.Acetyly.L.GlutamicAcid   | 0.914 | <2.22e-16 | 0.827 | <2.22e-16 | 0.957 | <2.22e-16 |
| P.Hydroxyphenyl.aceticAcid | 0.91  | <2.22e-16 | 0.781 | <2.22e-16 | 0.904 | <2.22e-16 |
| Palatinose                 | 0.88  | <2.22e-16 | 0.878 | <2.22e-16 | 0.727 | <2.22e-16 |
| Putrescine                 | 0.943 | <2.22e-16 | 0.903 | <2.22e-16 | 0.903 | <2.22e-16 |
| QuinicAcid                 | 0.773 | <2.22e-16 | 0.71  | <2.22e-16 | 0.511 | 4.77E-06  |
| Salicin                    | 0.678 | <2.22e-16 | 0.777 | <2.22e-16 | 0.862 | <2.22e-16 |
| SebacicAcid                | 0.67  | <2.22e-16 | 0.723 | <2.22e-16 | 0.922 | <2.22e-16 |
| Sedoheptulosan             | 0.748 | <2.22e-16 | 0.74  | <2.22e-16 | 0.544 | 1.19E-06  |
| Stachynose                 | 0.891 | <2.22e-16 | 0.87  | <2.22e-16 | 0.883 | <2.22e-16 |
| SuccinamicAcid             | 0.774 | <2.22e-16 | 0.78  | <2.22e-16 | 0.811 | <2.22e-16 |

|                              |       |           |       |           |       |           |
|------------------------------|-------|-----------|-------|-----------|-------|-----------|
| SuccinicAcid                 | 0.792 | <2.22e-16 | 0.819 | <2.22e-16 | 0.935 | <2.22e-16 |
| SuccinicAcidMono.MethylEster | 0.838 | <2.22e-16 | 0.636 | <2.22e-16 | 0.738 | <2.22e-16 |
| Sucrose                      | 0.527 | 2.50E-06  | 0.575 | 2.38E-07  | 0.968 | <2.22e-16 |
| Turanose                     | 0.86  | <2.22e-16 | 0.895 | <2.22e-16 | 0.921 | <2.22e-16 |
| Tween80                      | 0.897 | <2.22e-16 | 0.776 | <2.22e-16 | 0.887 | <2.22e-16 |
| Uridine                      | 0.725 | <2.22e-16 | 0.619 | <2.22e-16 | 0.78  | <2.22e-16 |
| Water                        | 0.728 | <2.22e-16 | 0.783 | <2.22e-16 | 0.543 | 1.31E-06  |
| 2.AminoEthanol               | 0.953 | <2.22e-16 | 0.951 | <2.22e-16 | 0.813 | <2.22e-16 |
| 2.Keto.D.GluconicAcid        | 0.946 | <2.22e-16 | 0.962 | <2.22e-16 | 0.876 | <2.22e-16 |
| Xylitol                      | 0.97  | <2.22e-16 | 0.943 | <2.22e-16 | 0.969 | <2.22e-16 |

**Figure S1a. (supplementary material)** Average values (n=3) of optical density units (OD) at 490nm (respiration). Phenotype Microarray averaged curves of CO, BA and BR on all the 95 substrates + water. The x-axis shows the measurement time in hours, the y-axis the measured colour intensities in optical density units (OD).

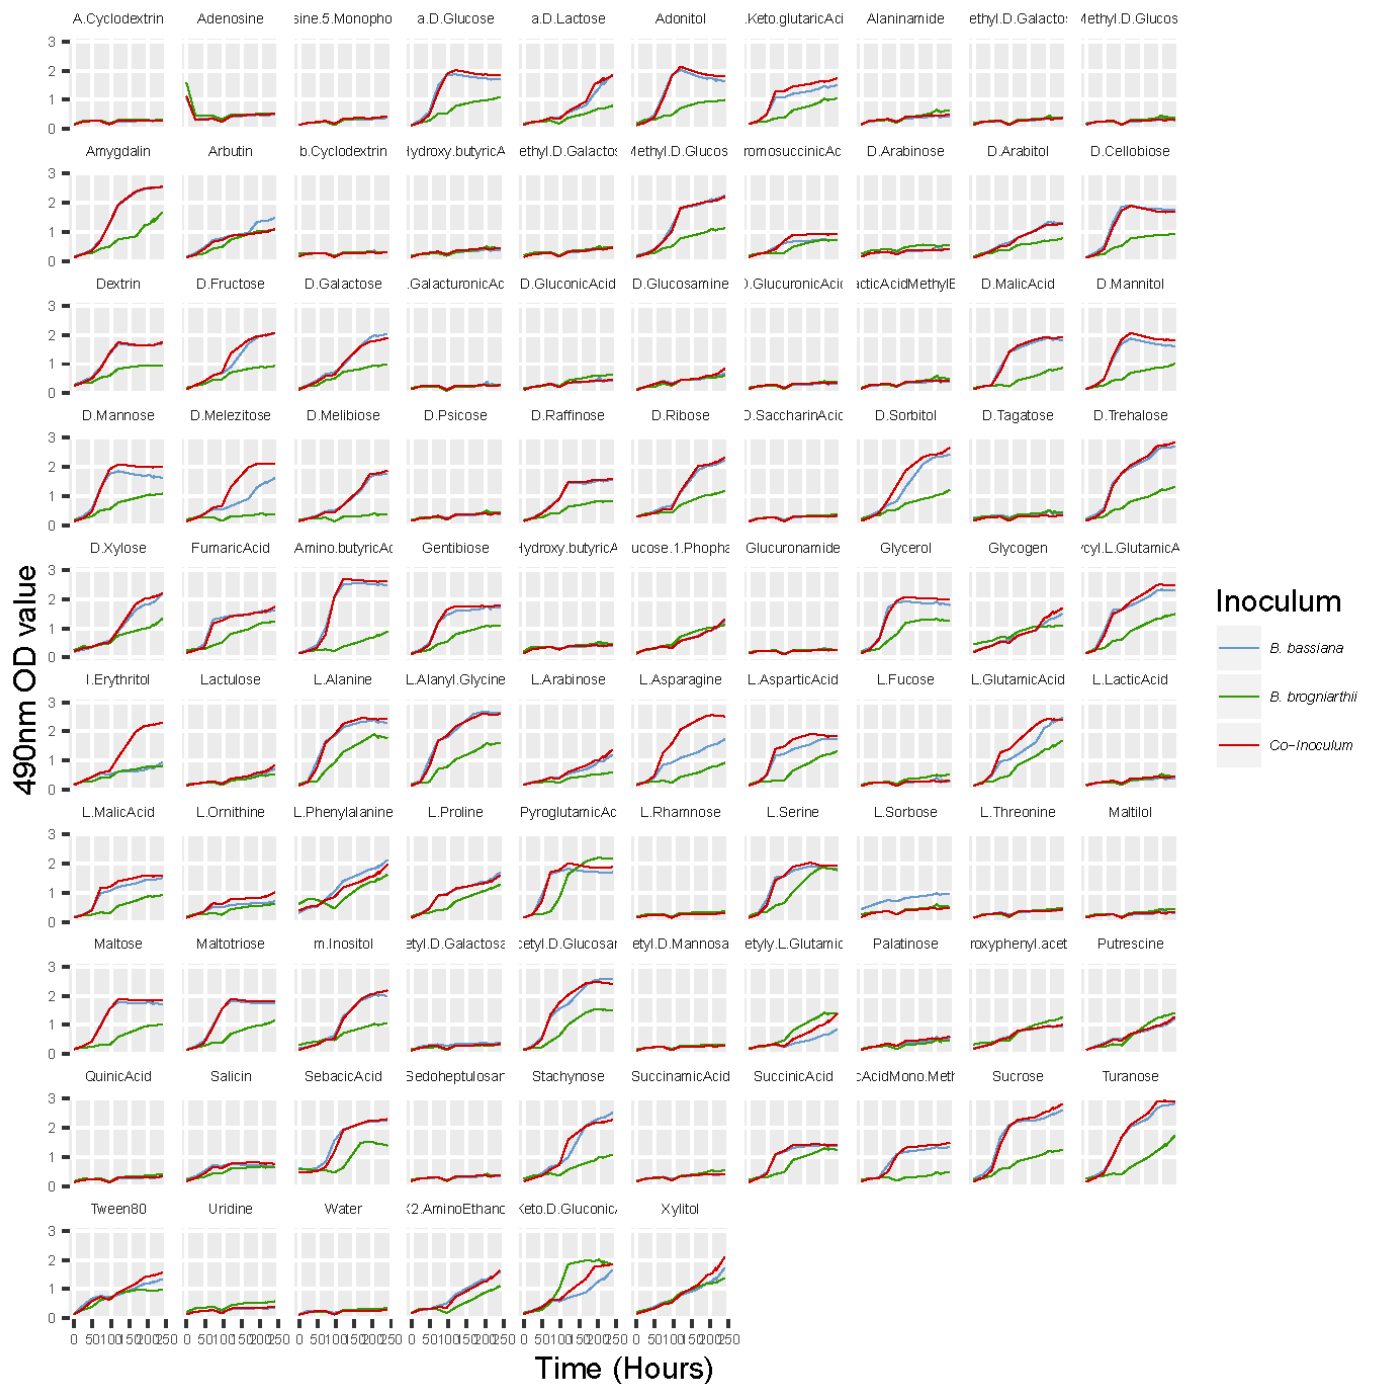

**Figure S1b. (supplementary material)** Average values (n=3) of optical density units (OD) at 750nm (growth/biomass). Phenotype Microarray averaged curves of CO, BA and BR on all the 95 substrates + water. The x-axis shows the measurement time in hours, the y-axis the measured colour intensities in optical density units (OD).

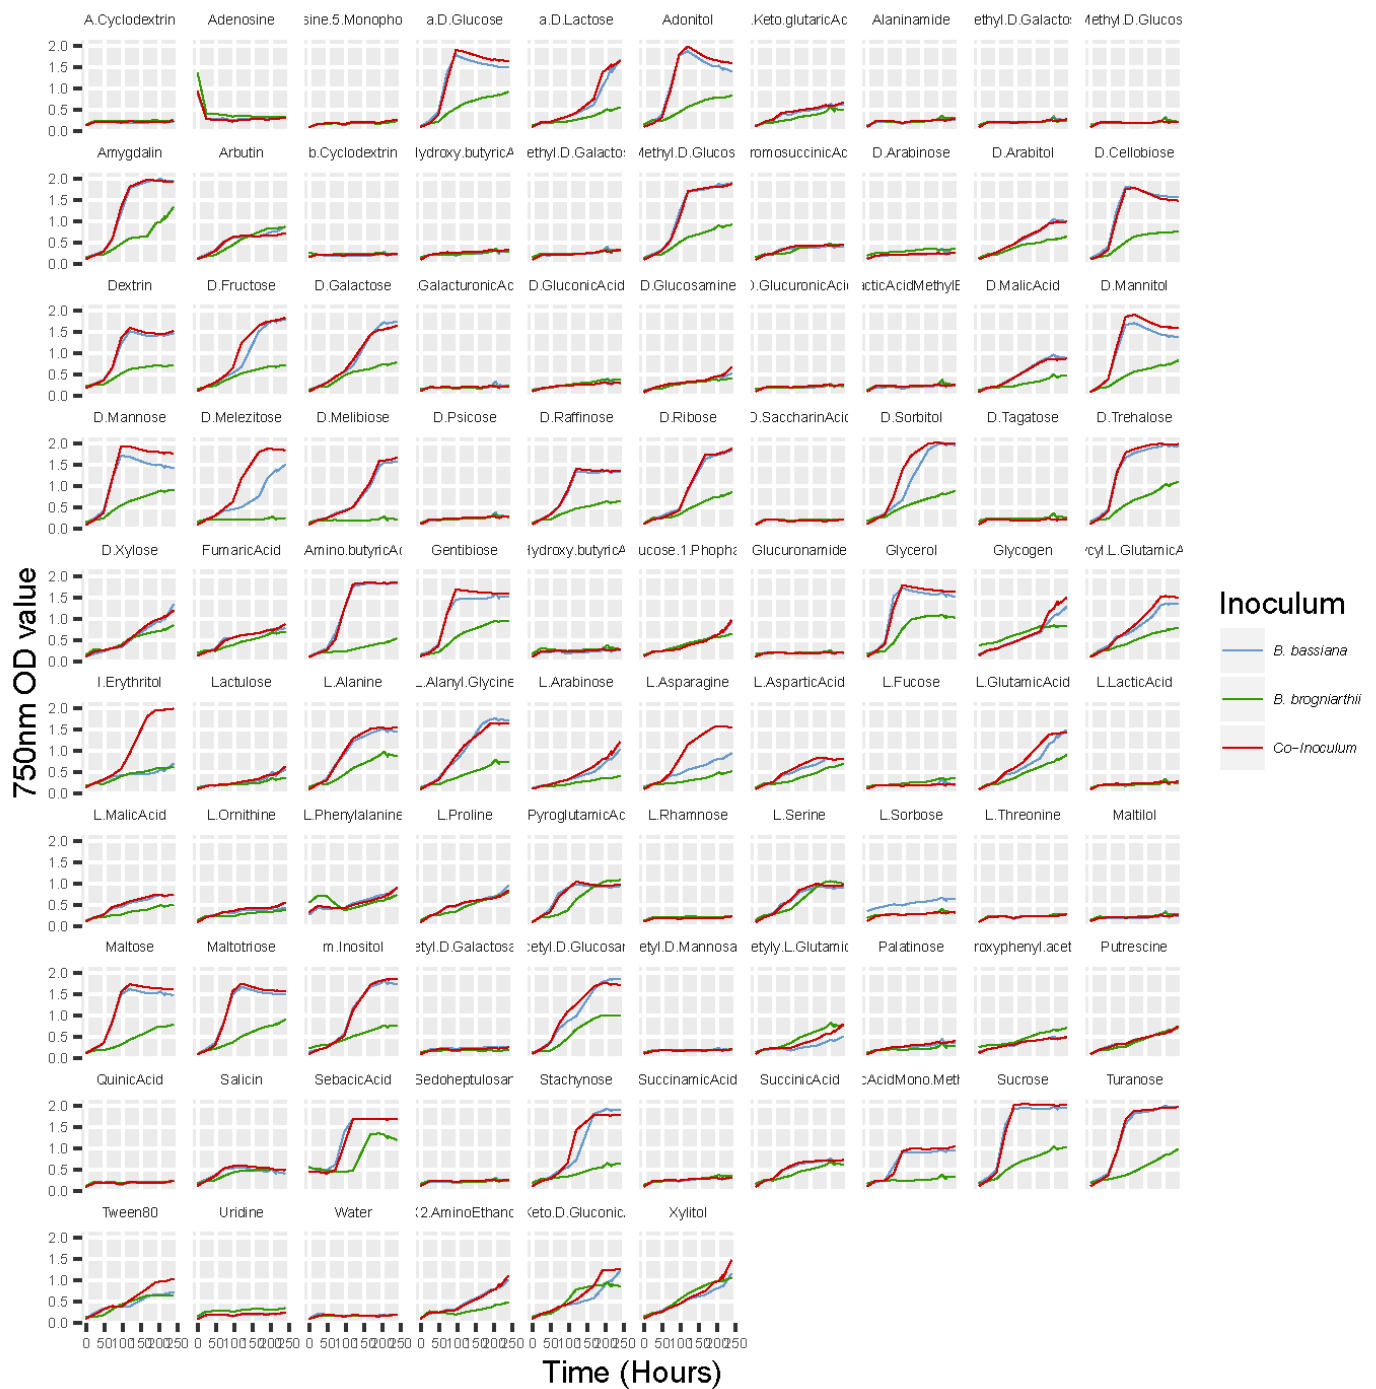

**Figures S2 (1 to 96)** LOESS (locally weighted scatterplot smoothing) non-parametric regression curves obtained plotting respiration to growth values in time, from all the 96 substrates by the three inoculums.

# A. Cyclodextrin

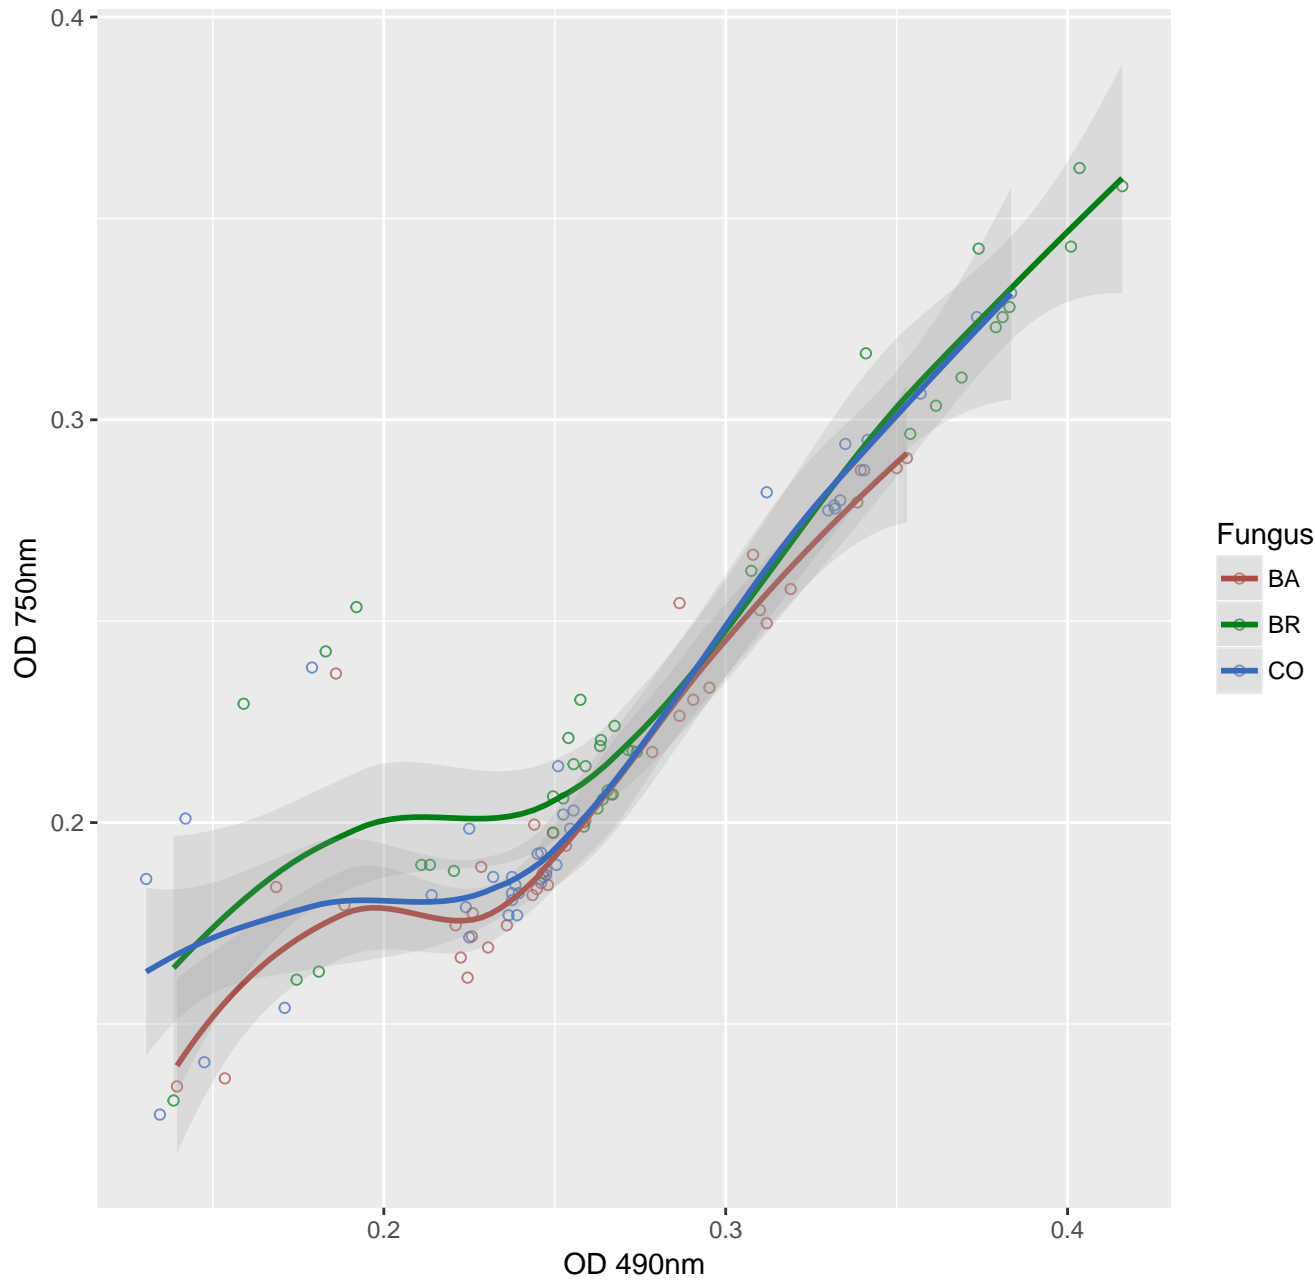

# Adenosine

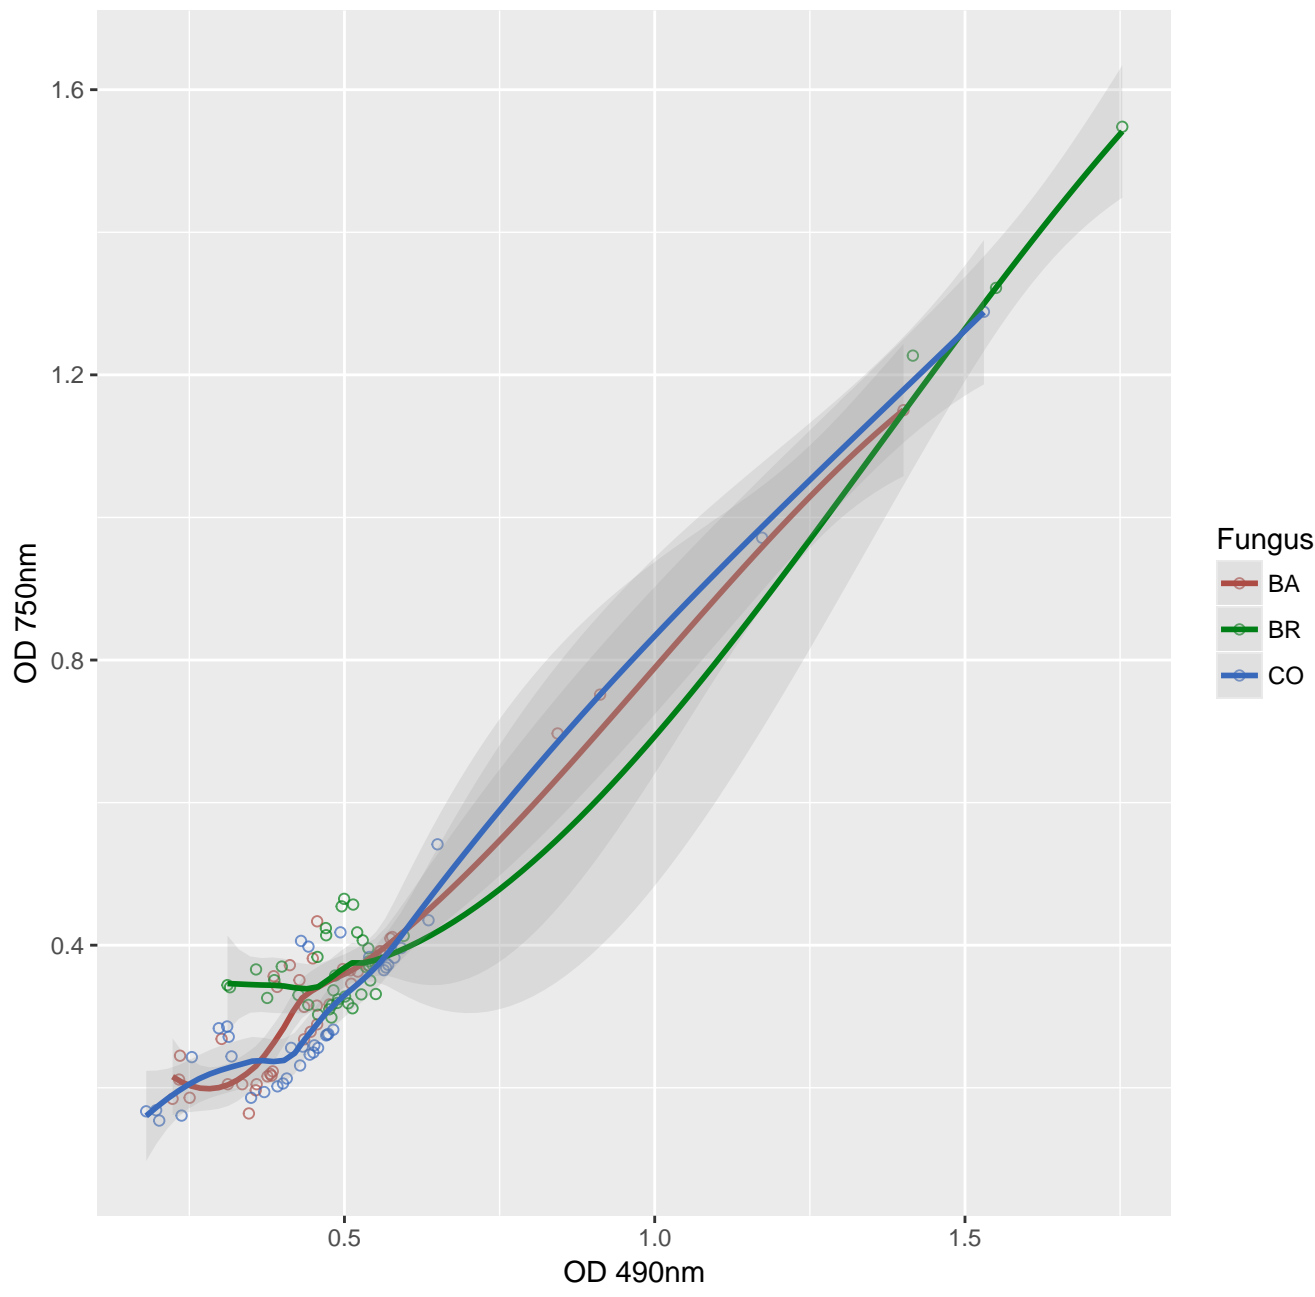

# Adenosine.5.Monophosphate

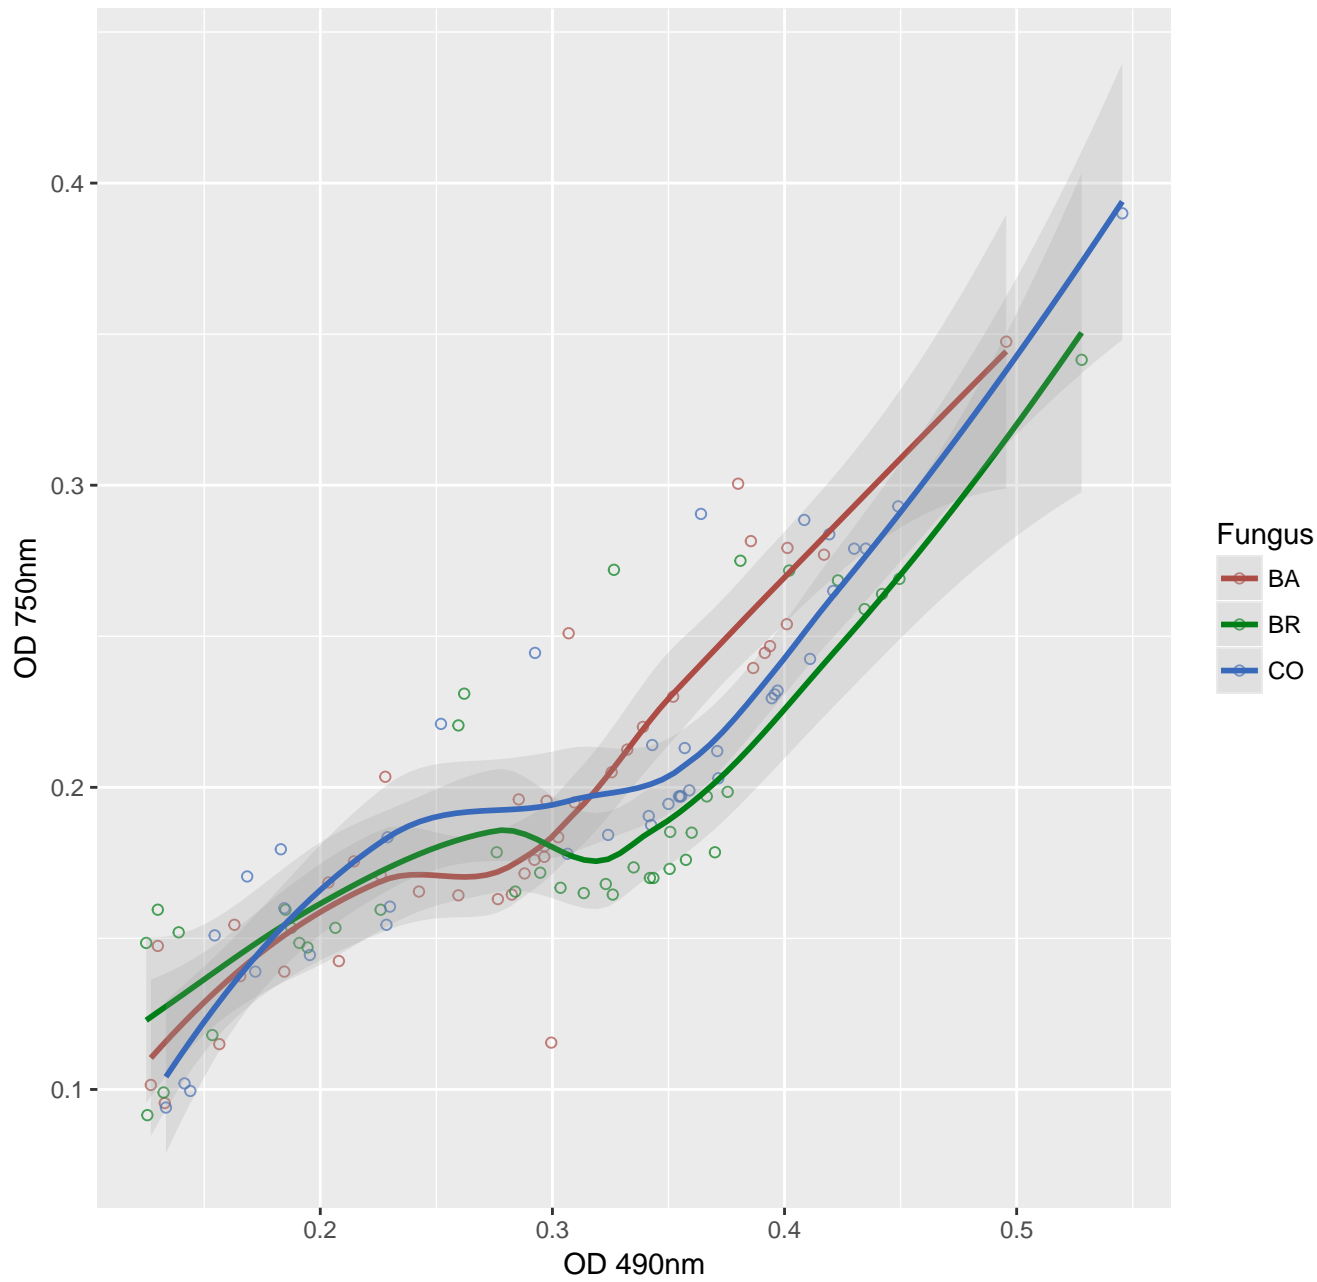



# a.D.Glucose

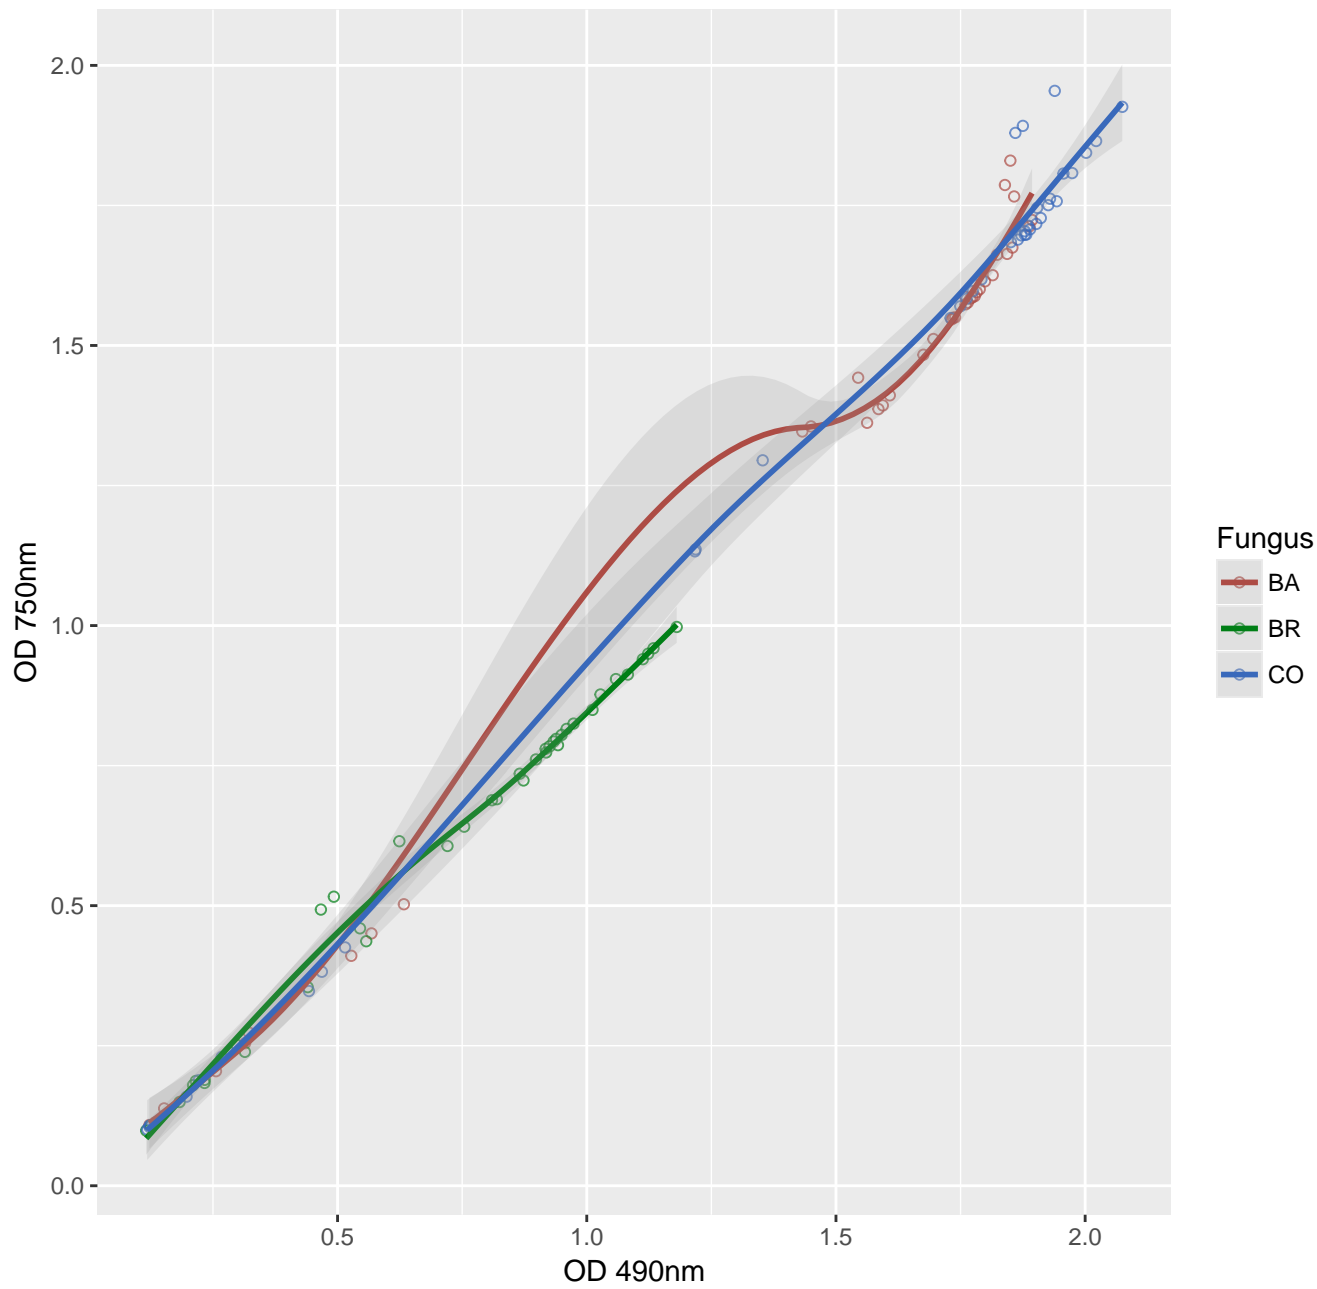

# a.D.Lactose

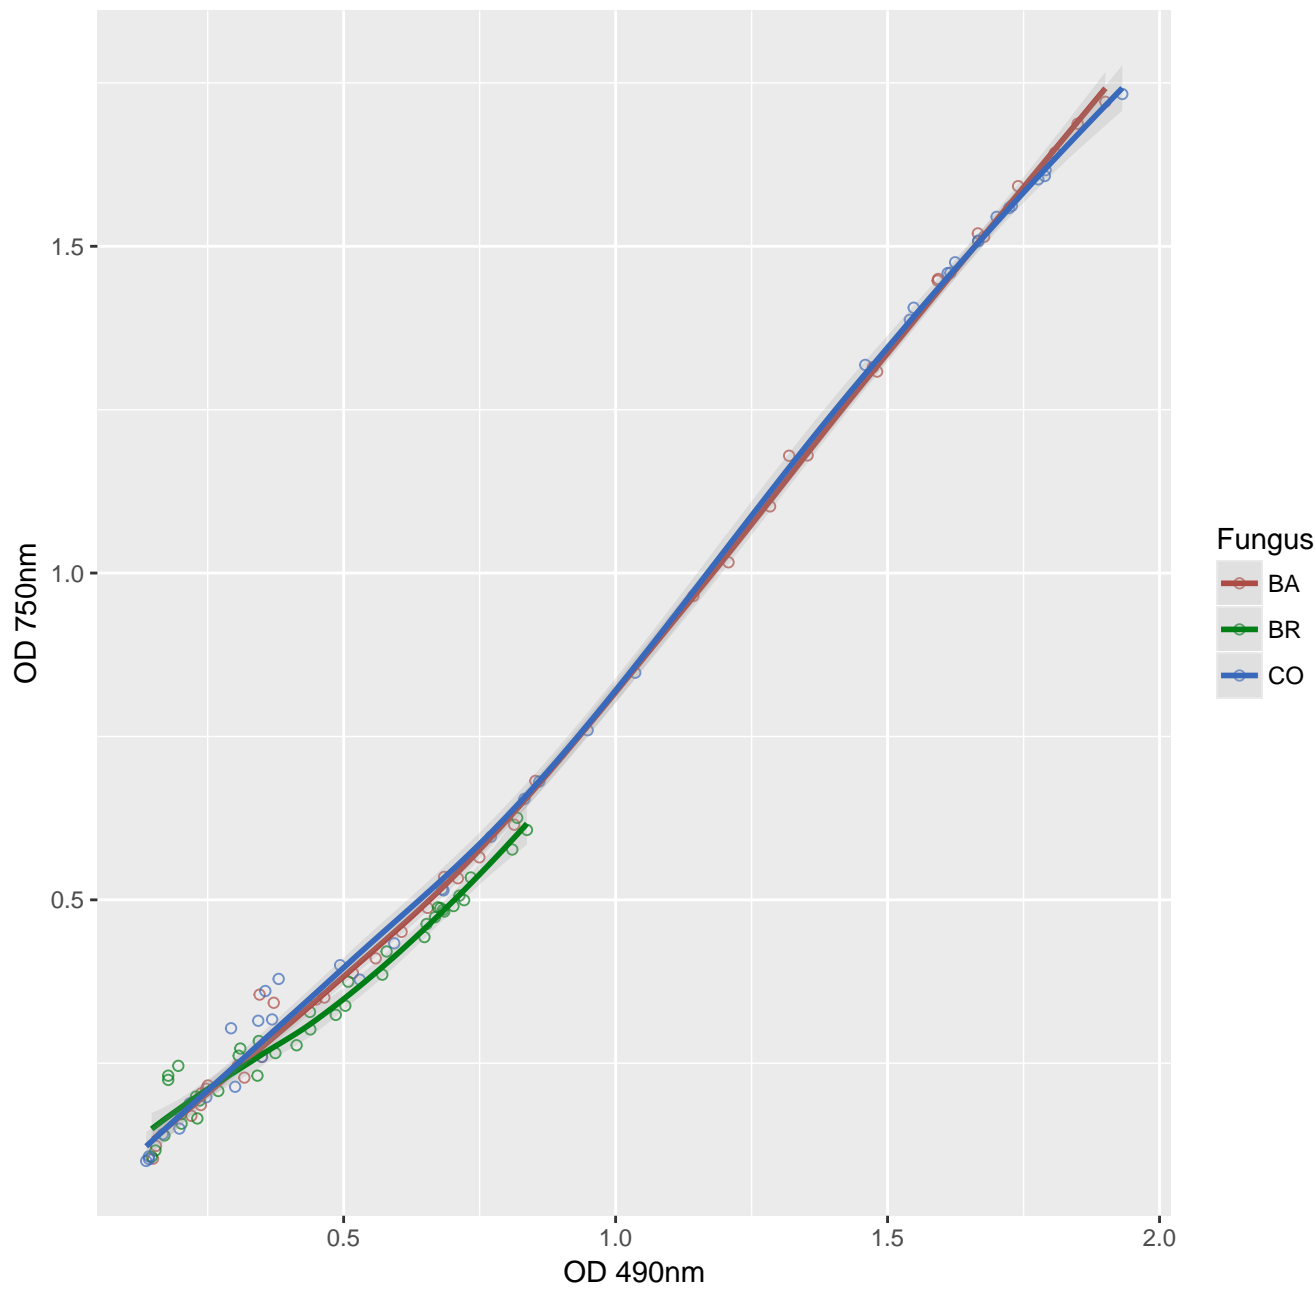

# Adonitol

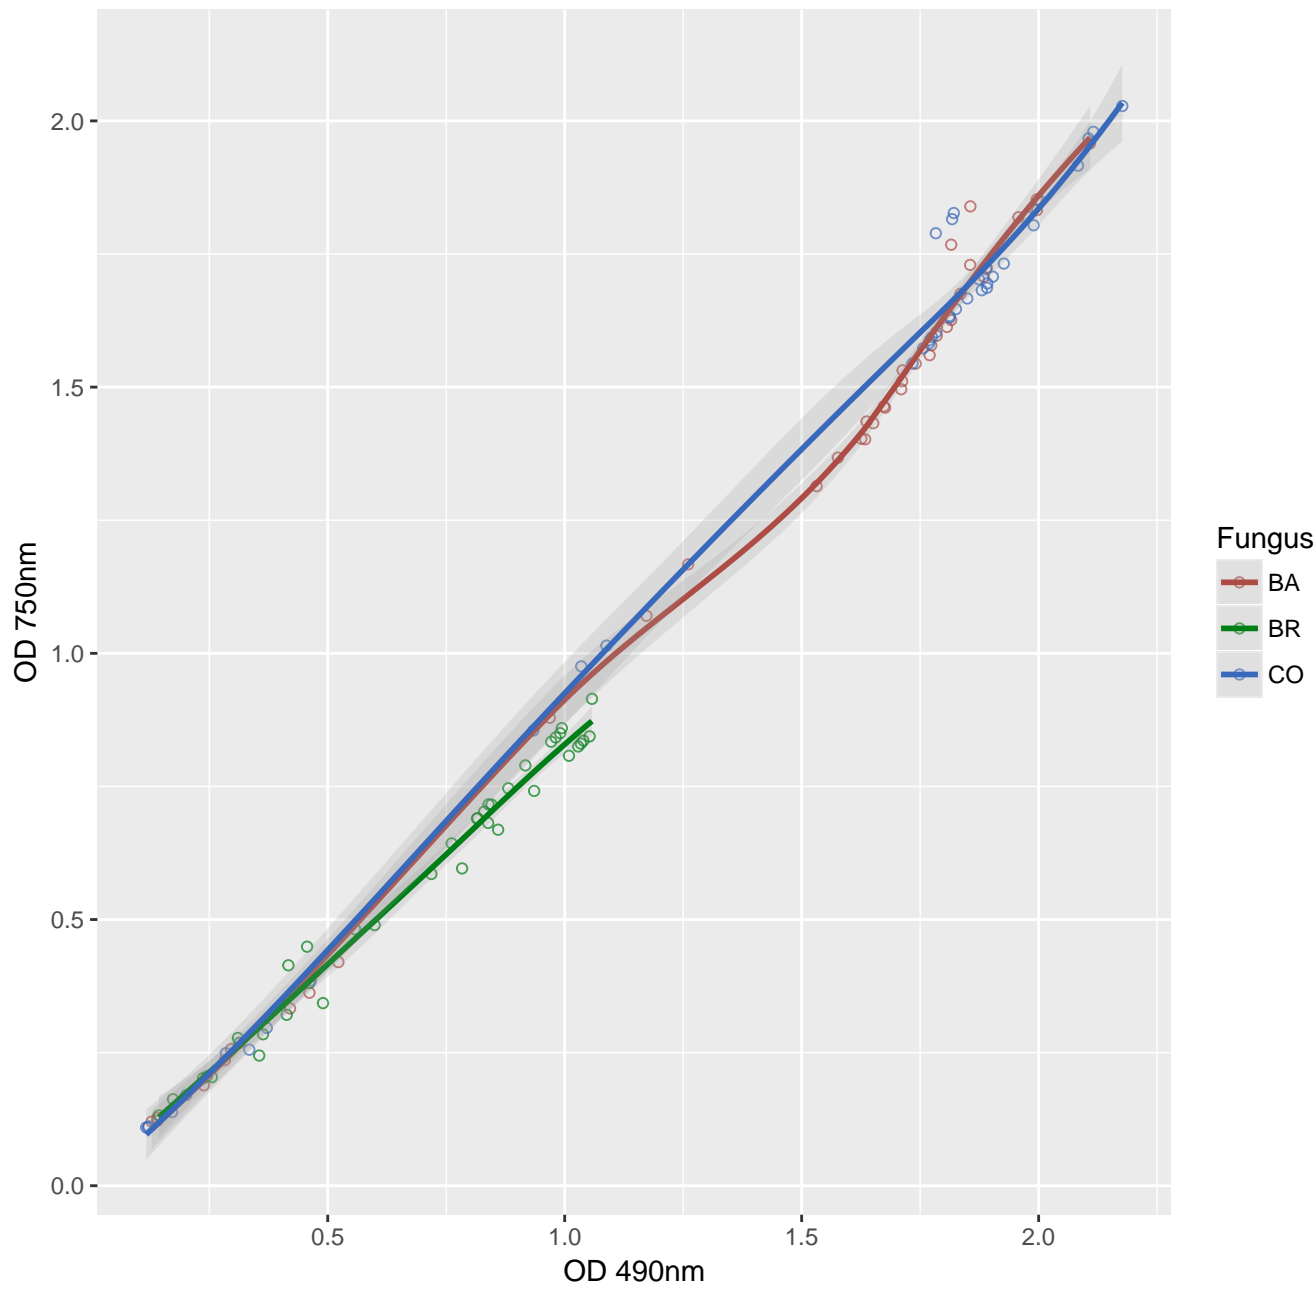

# A.Keto.glutaricAcid

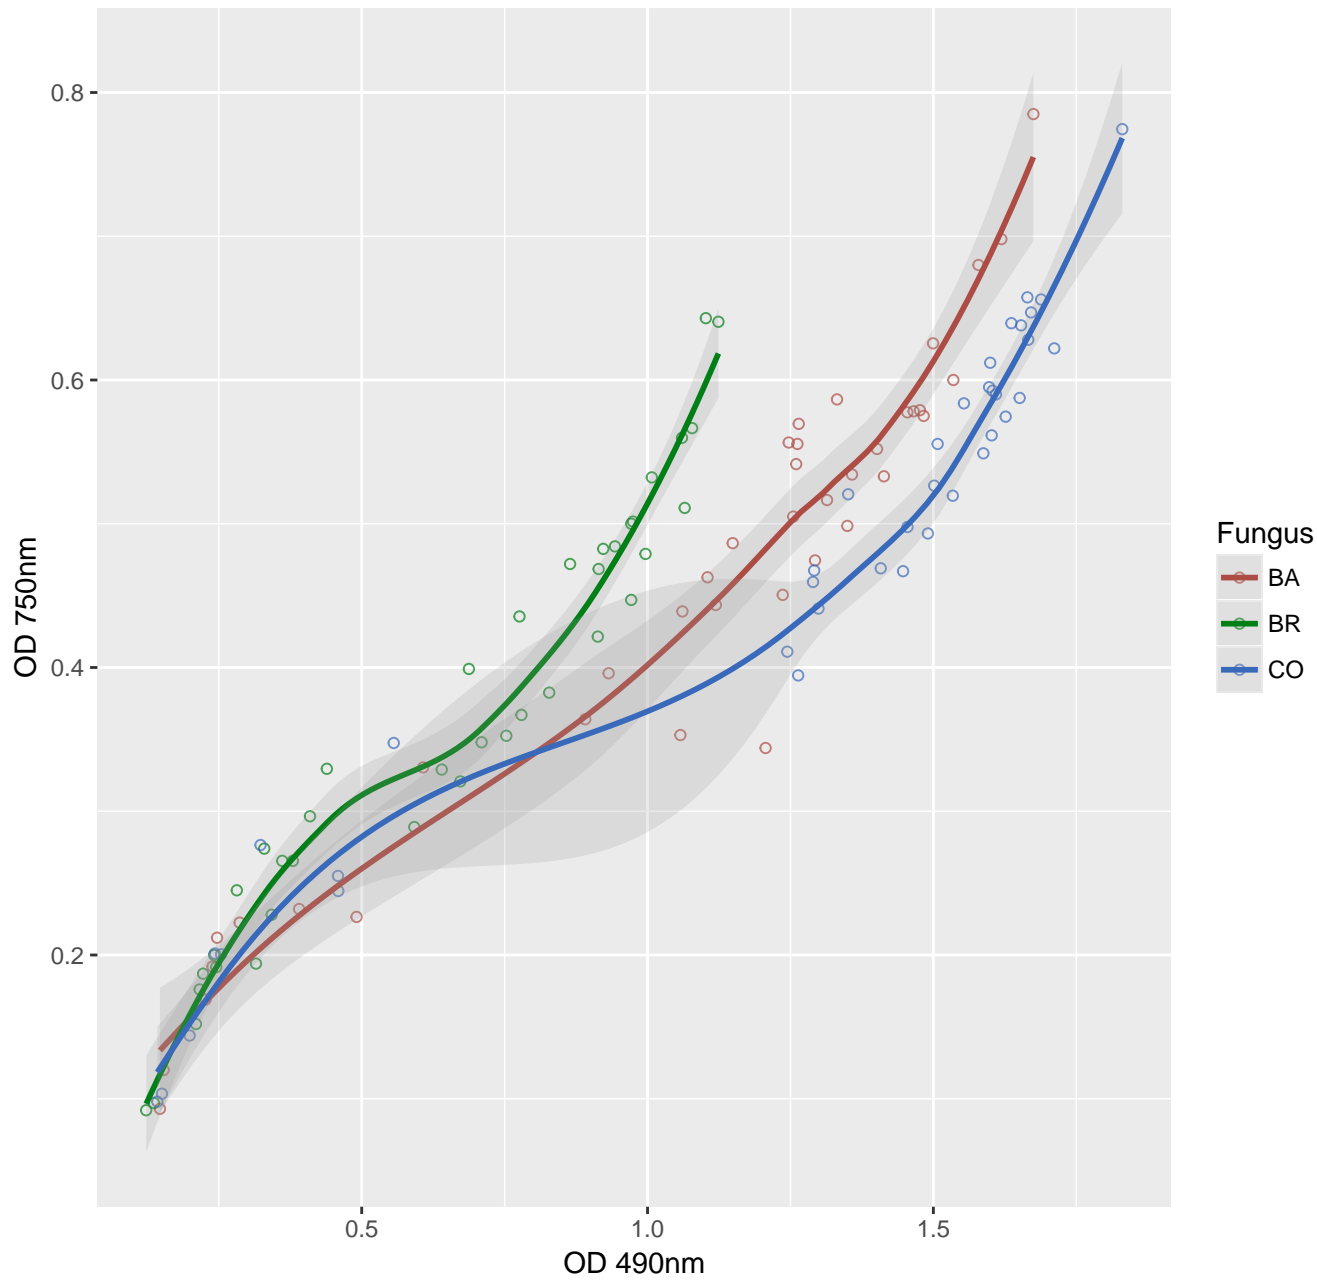

# Alaninamide

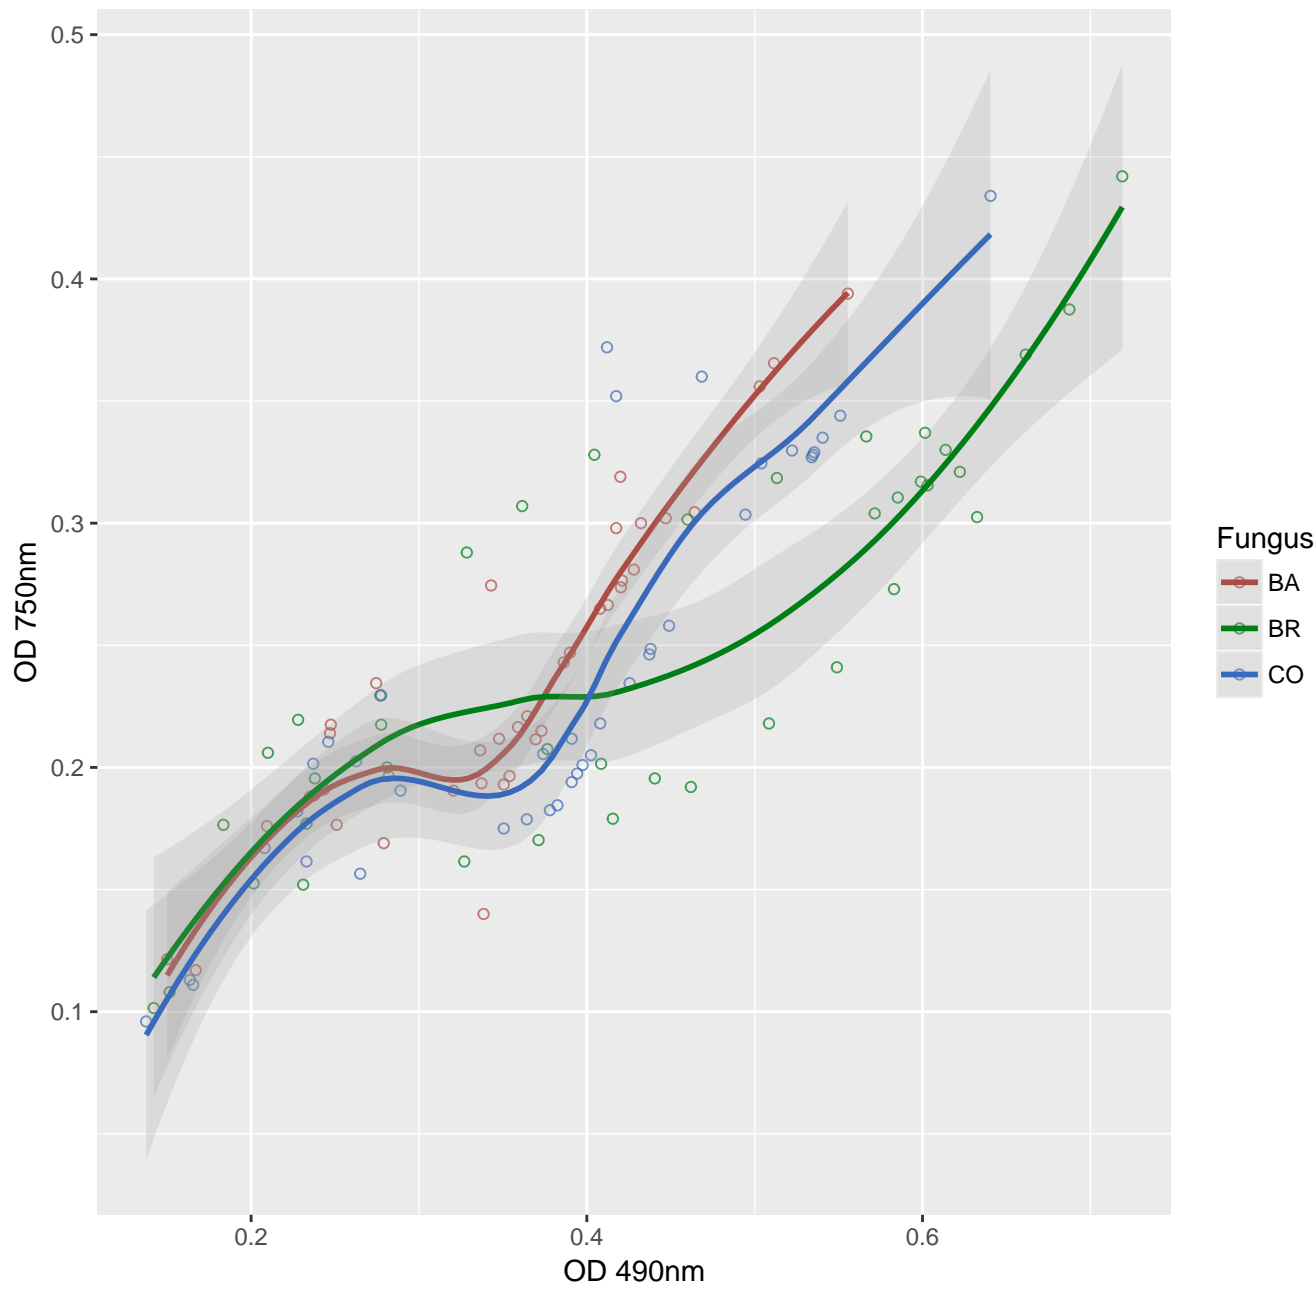

# a.Methyl.D.Galactoside

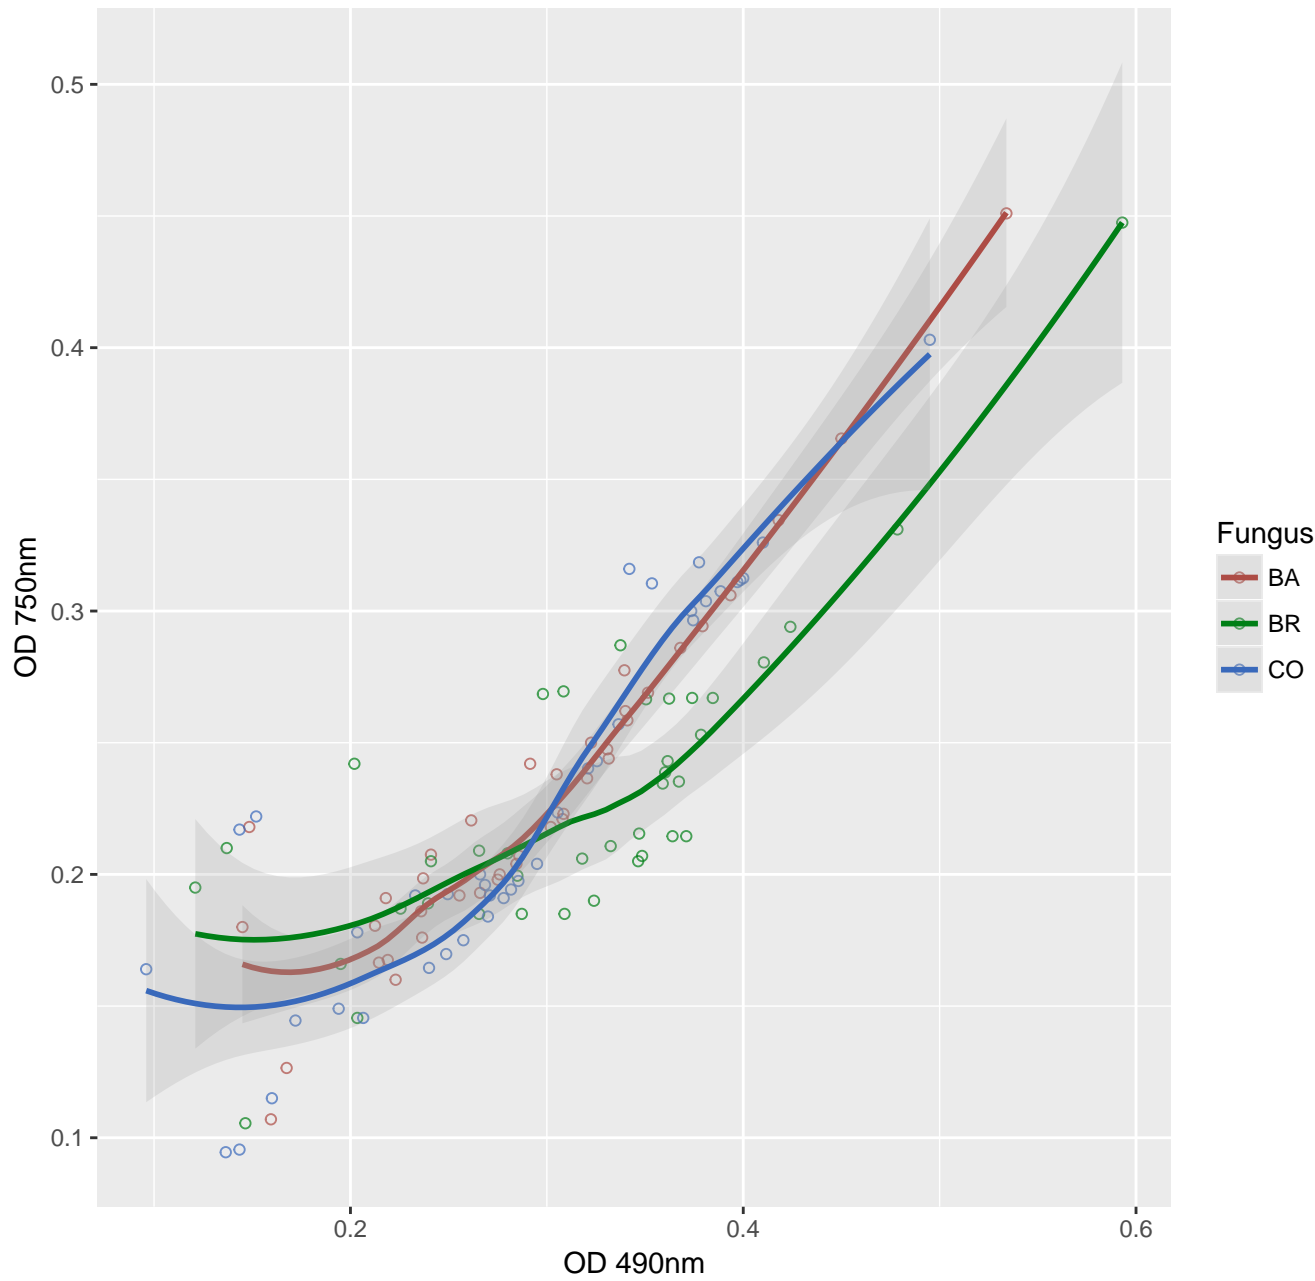

# a.Methyl.D.Glucoside

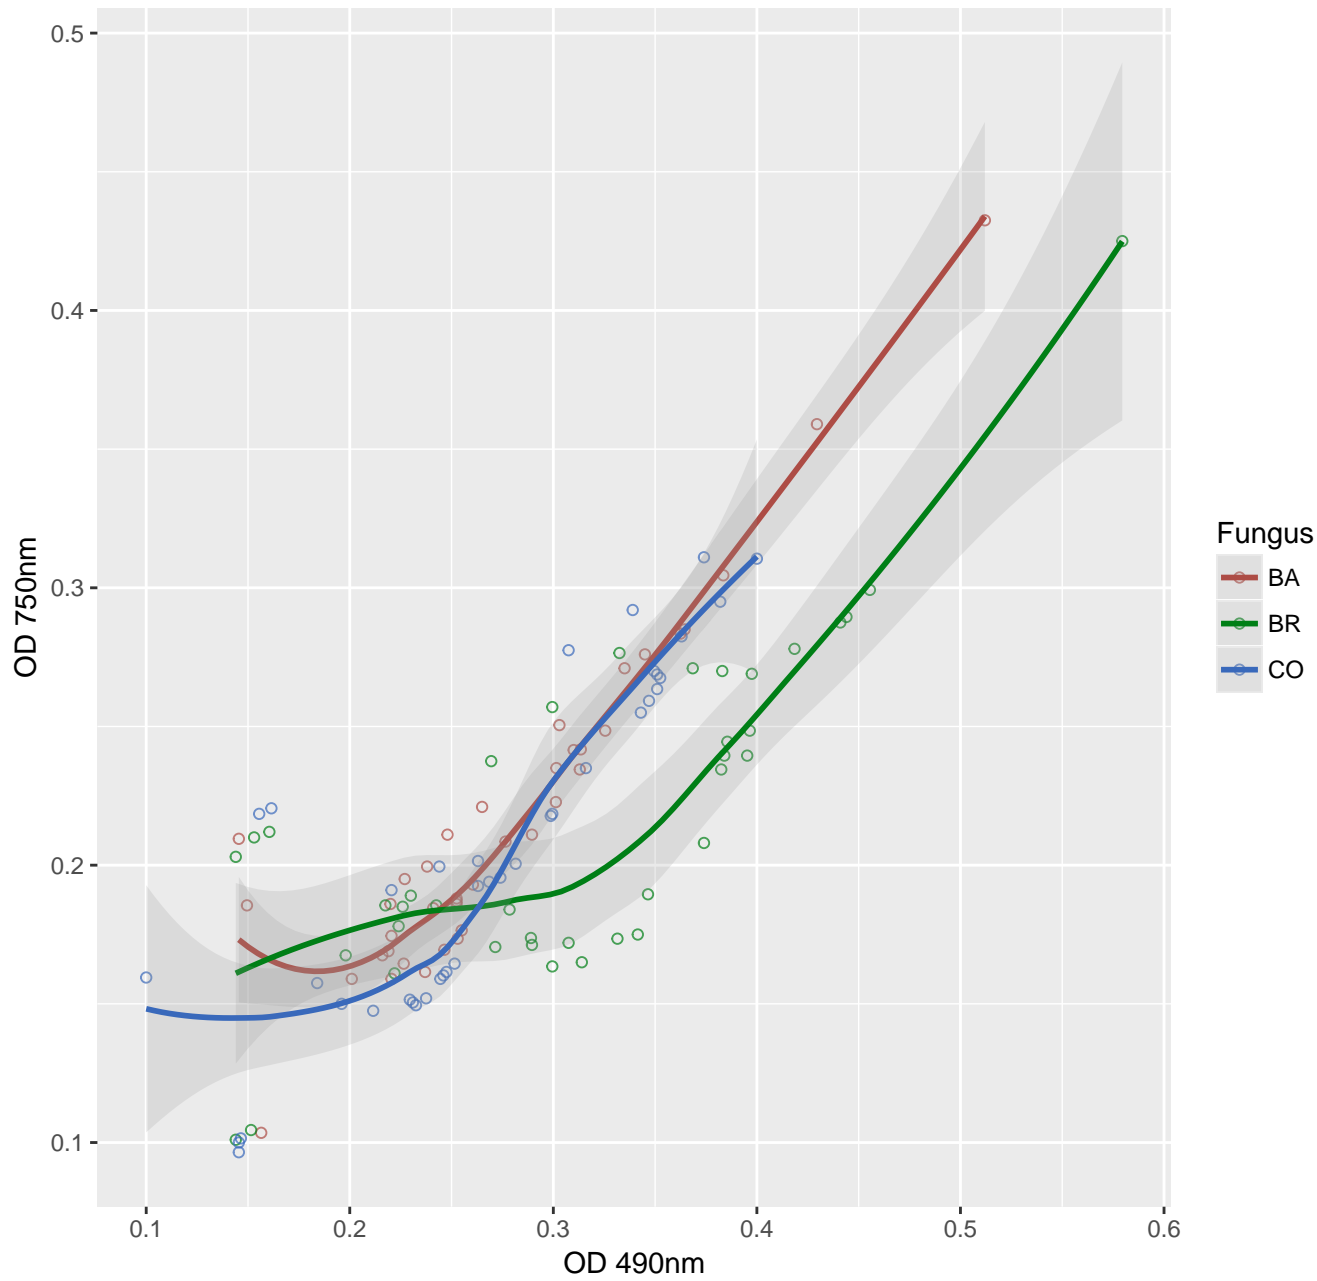

# Amygdalin

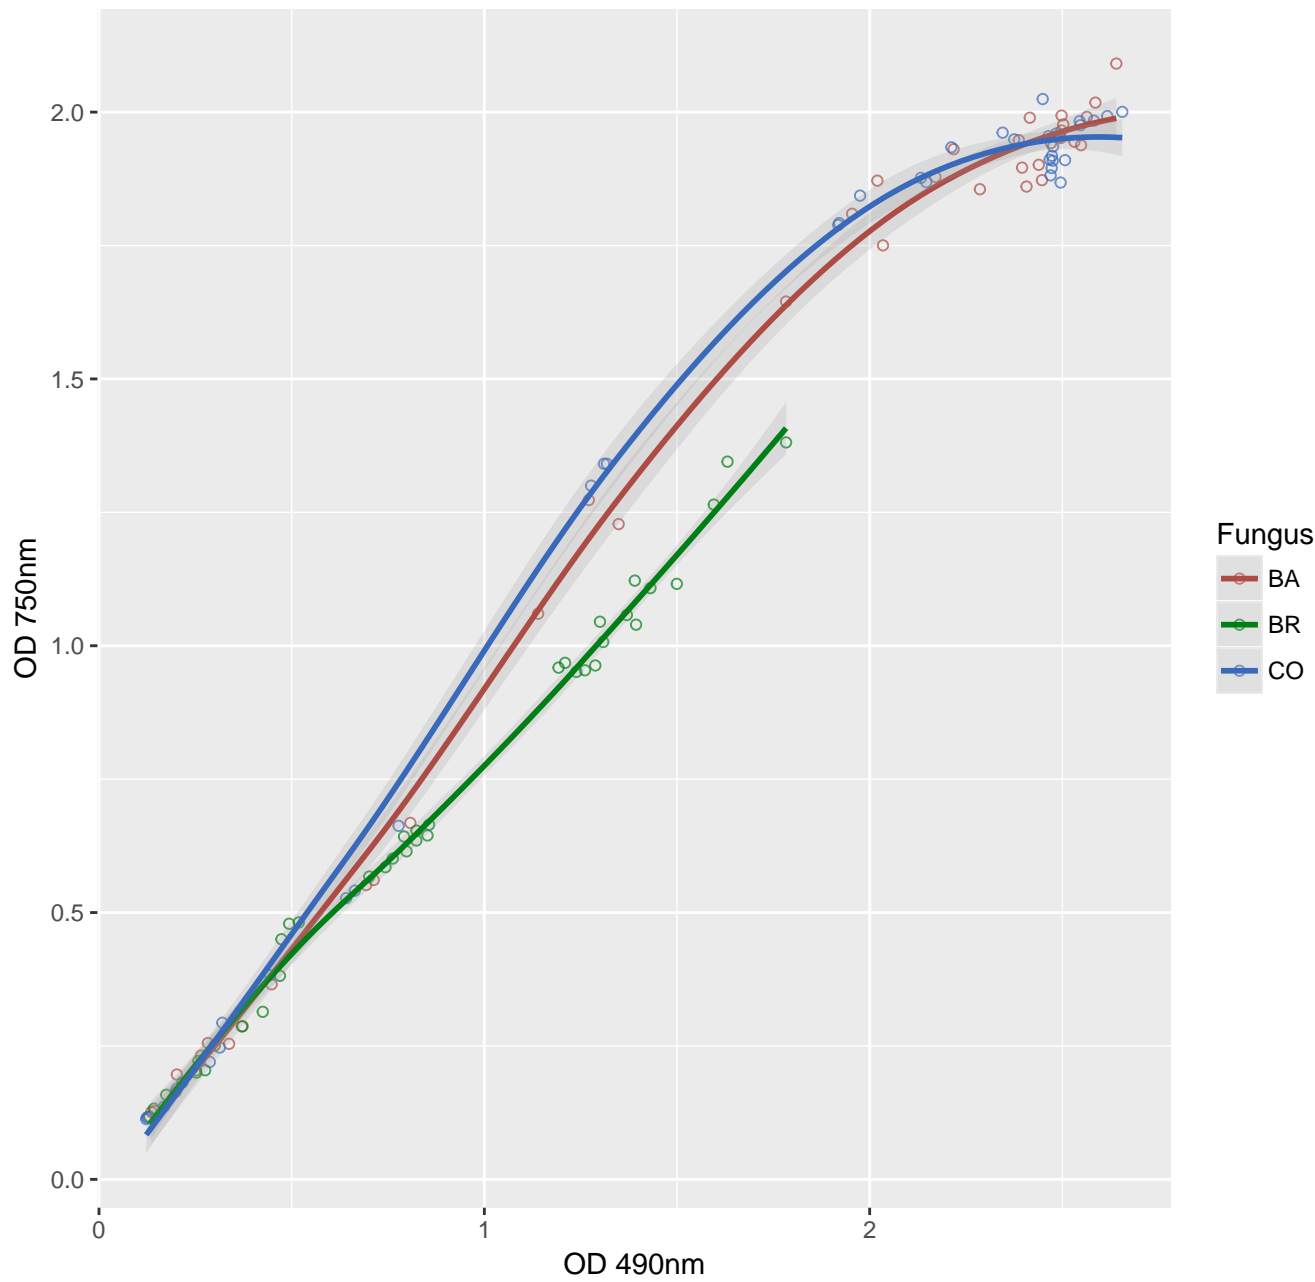



# Arbutin

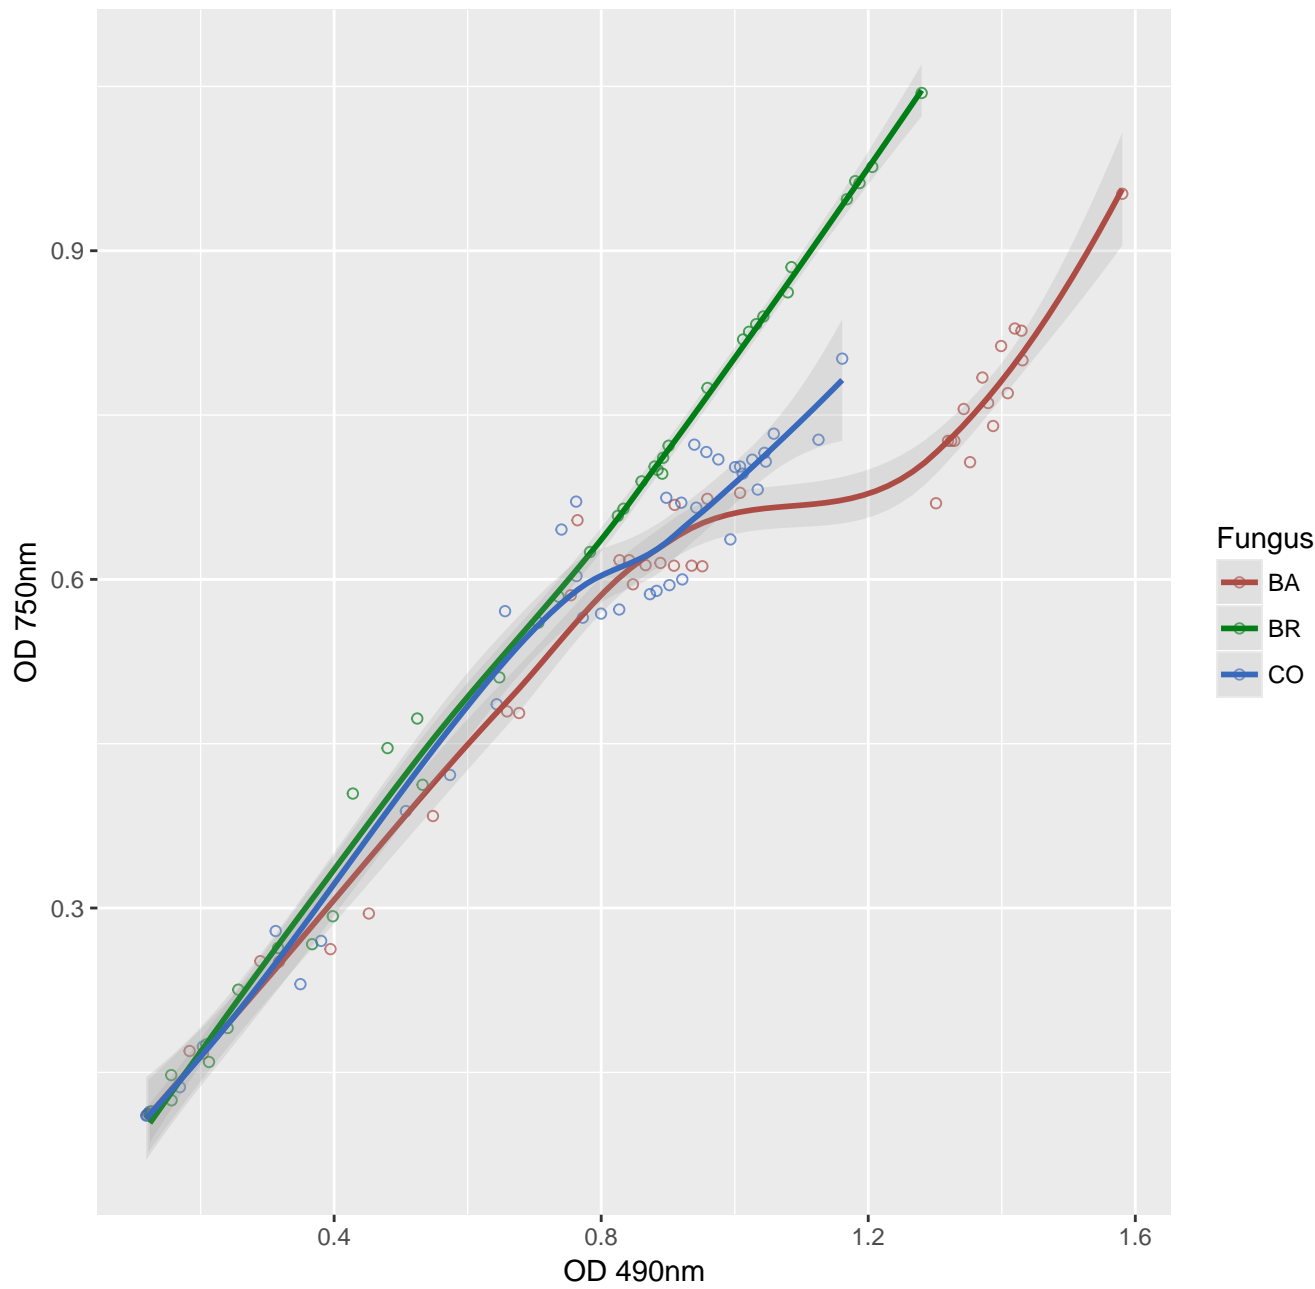

## b. Cyclodextrin

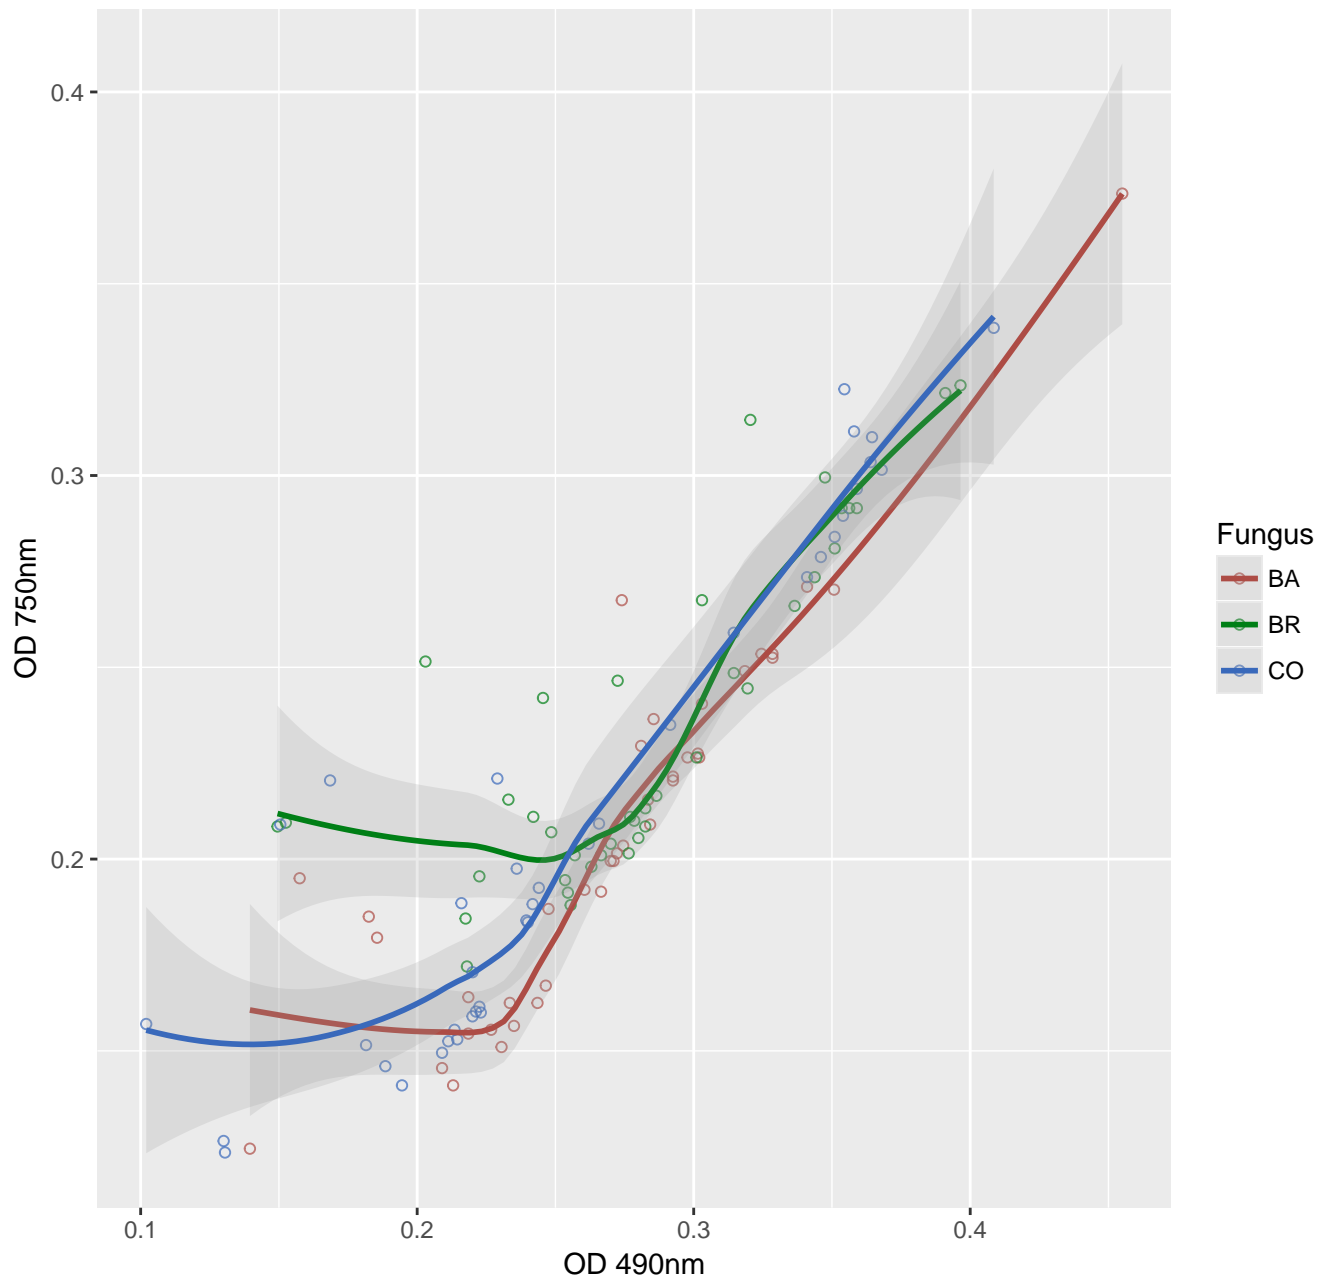

# B. Hydroxy. butyric Acid

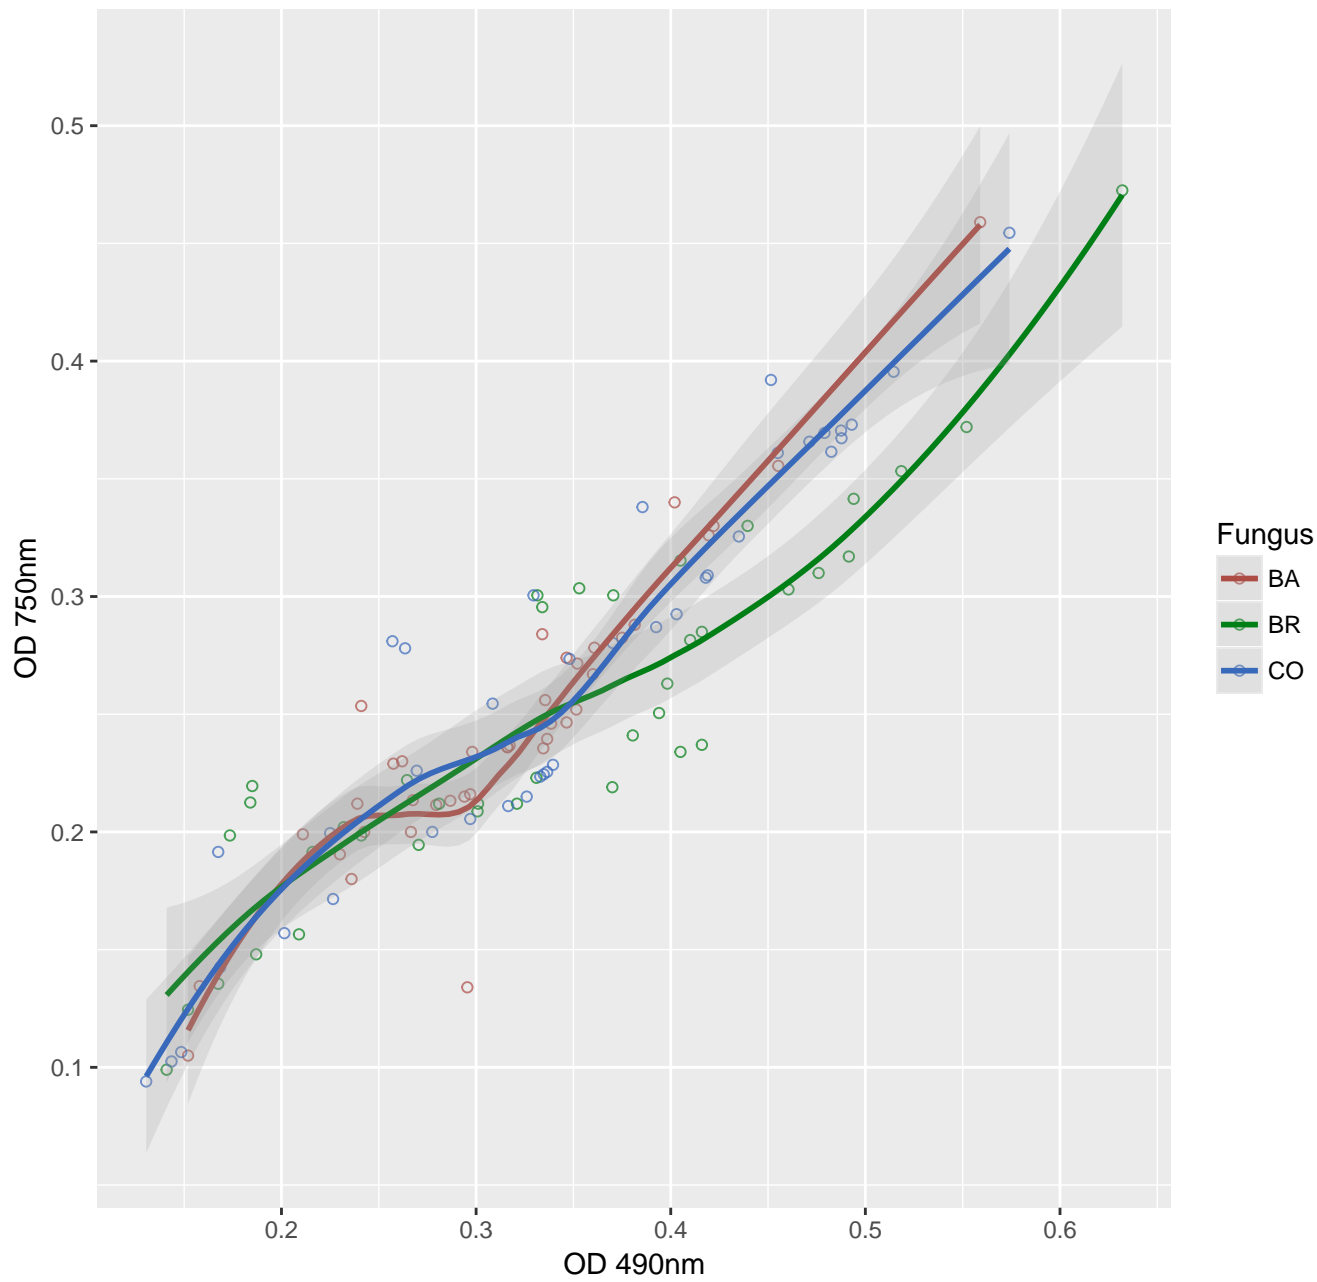

# b.Methyl.D.Galactoside

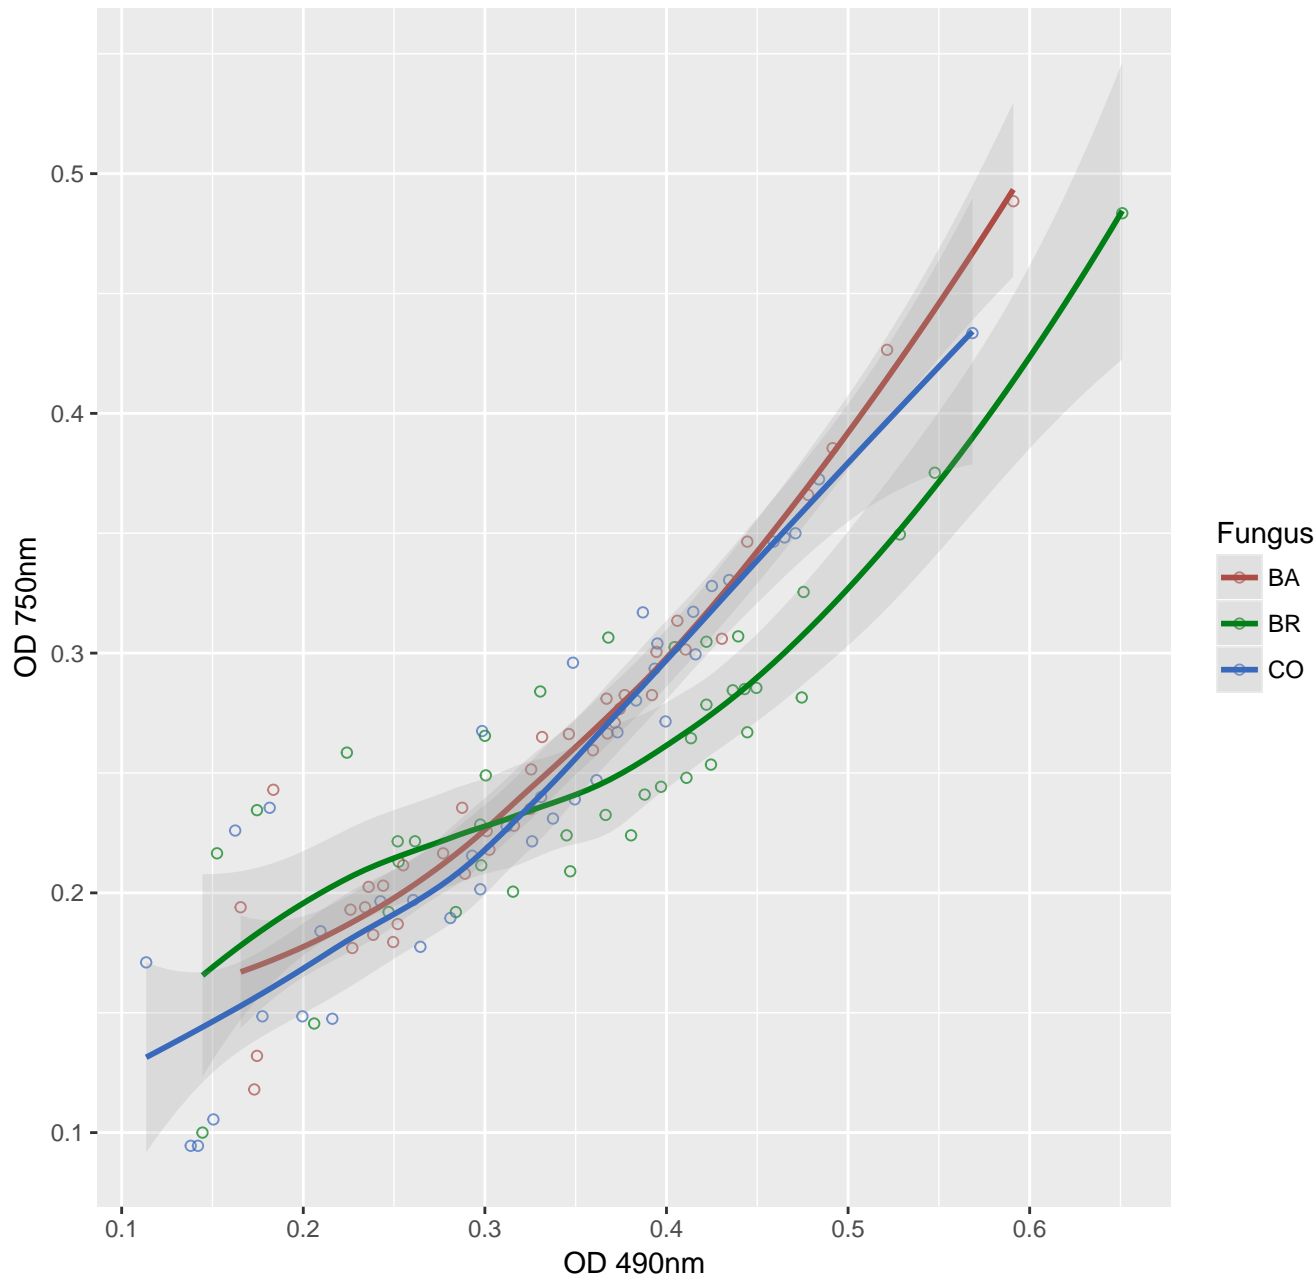

# b.Methyl.D.Glucoside

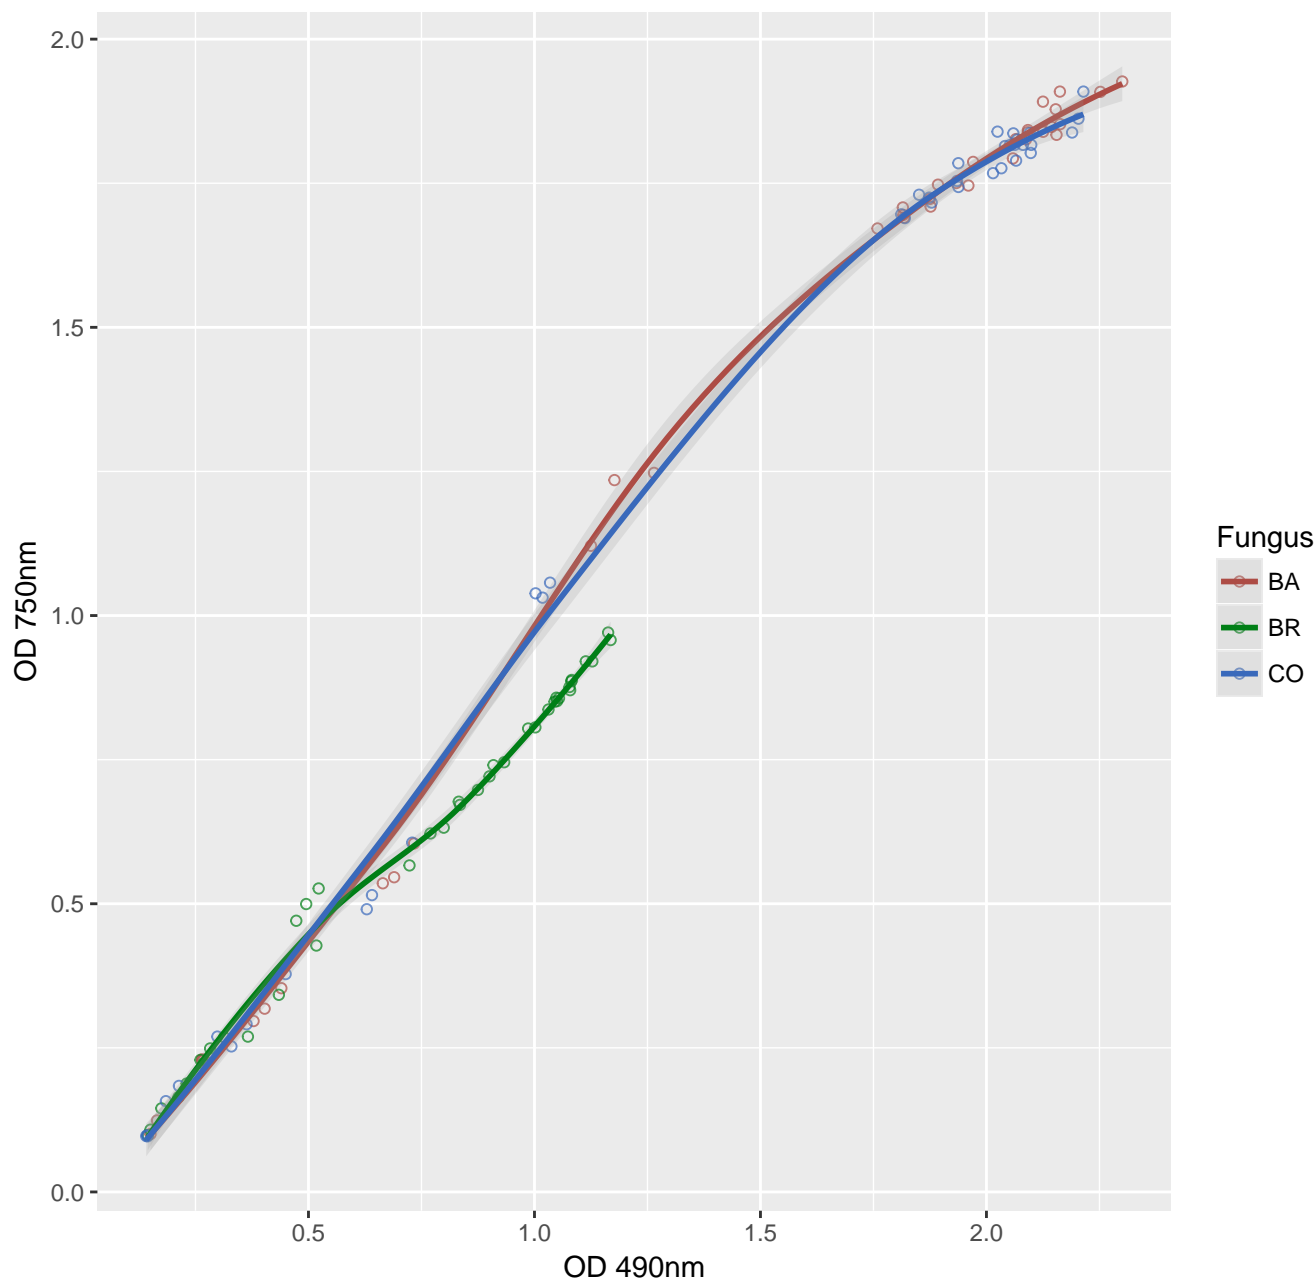

# BromosuccinicAcid

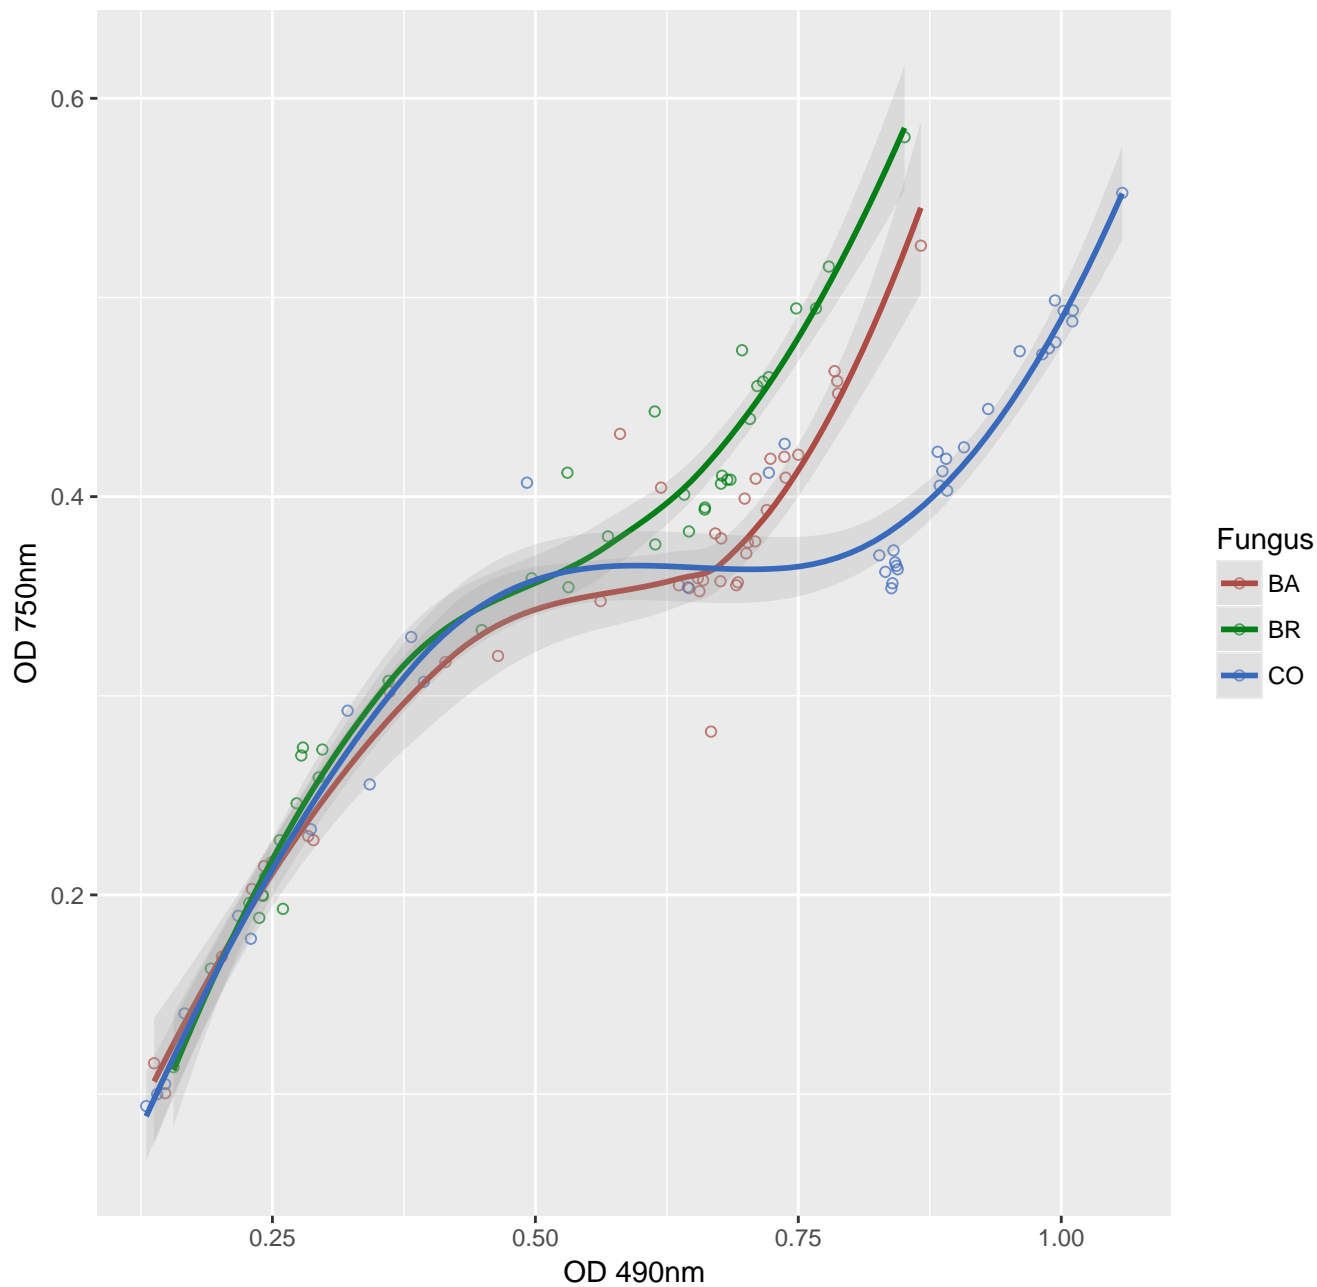

# D.Arabinose

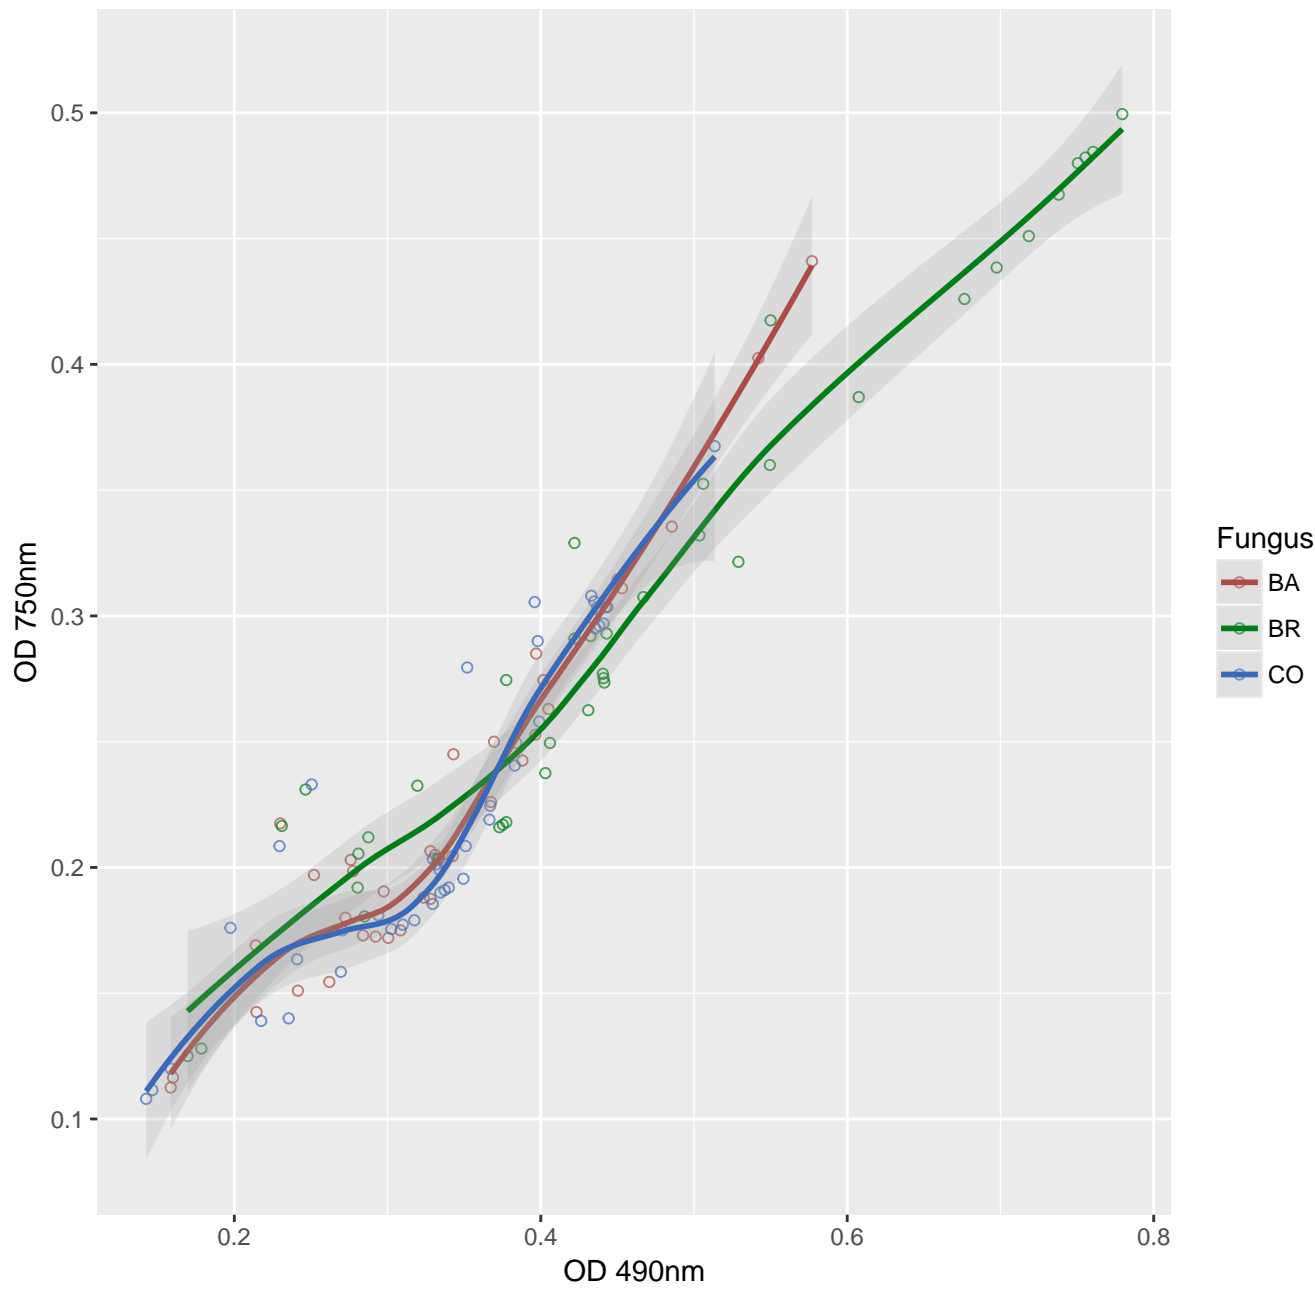

# D.Arabitol

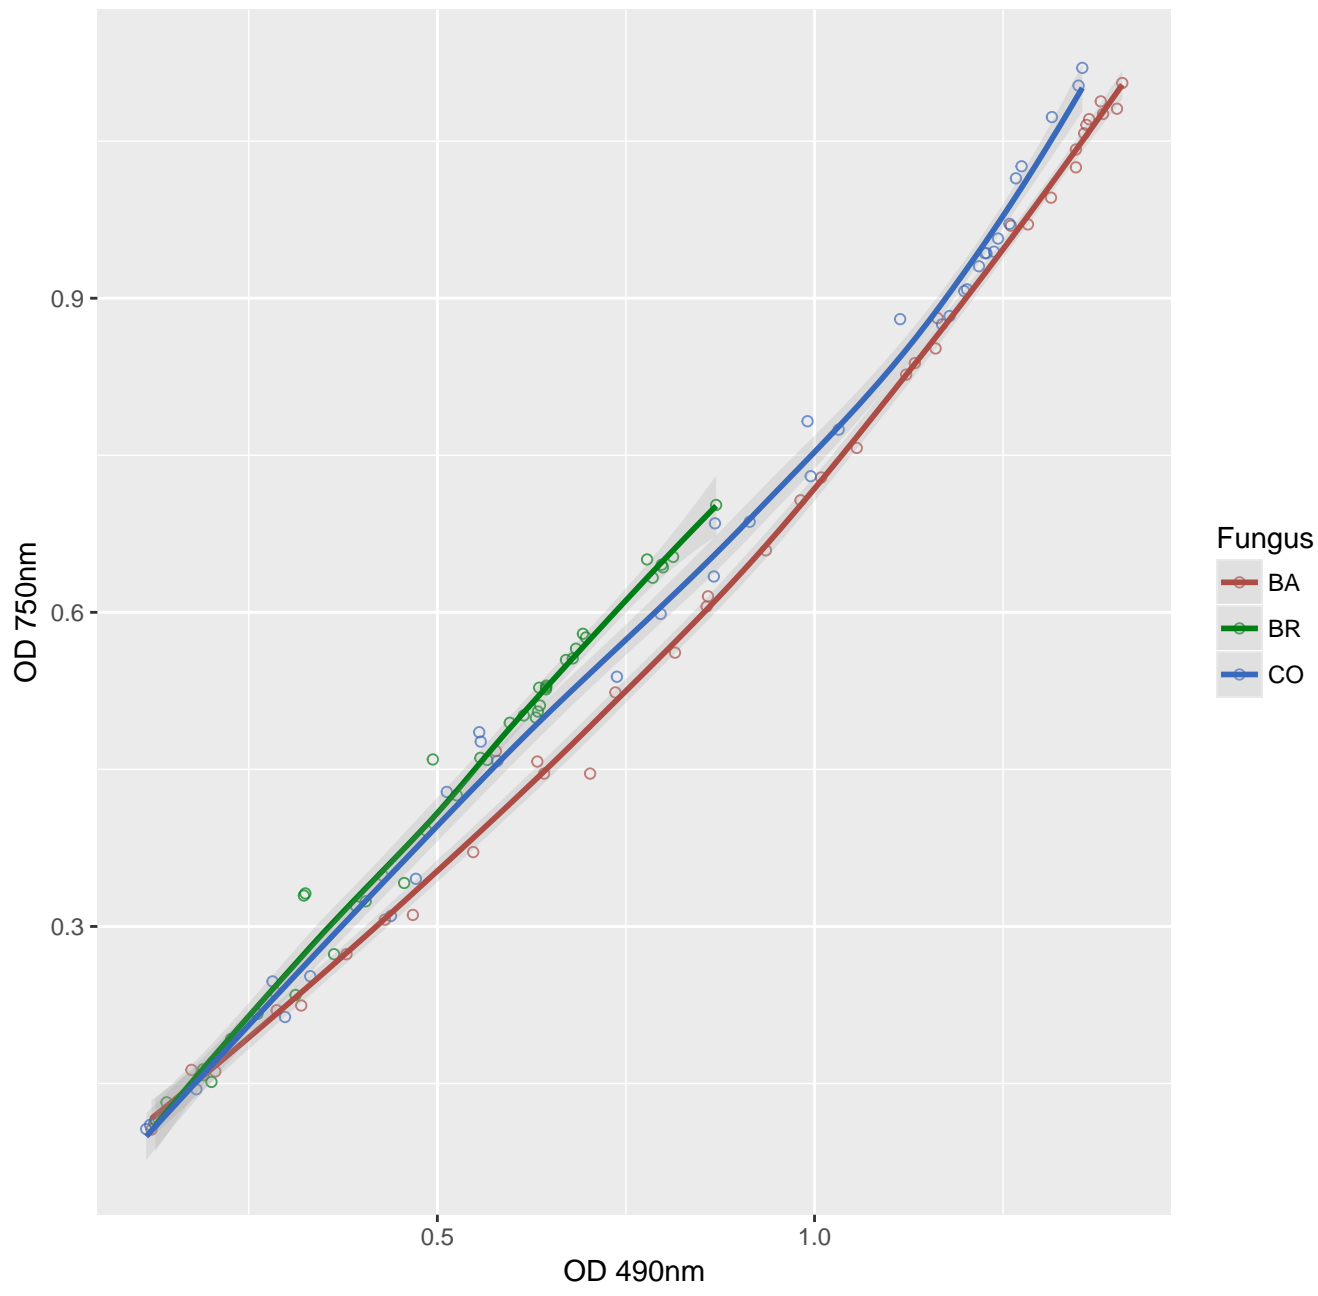



# D.Cellobiose

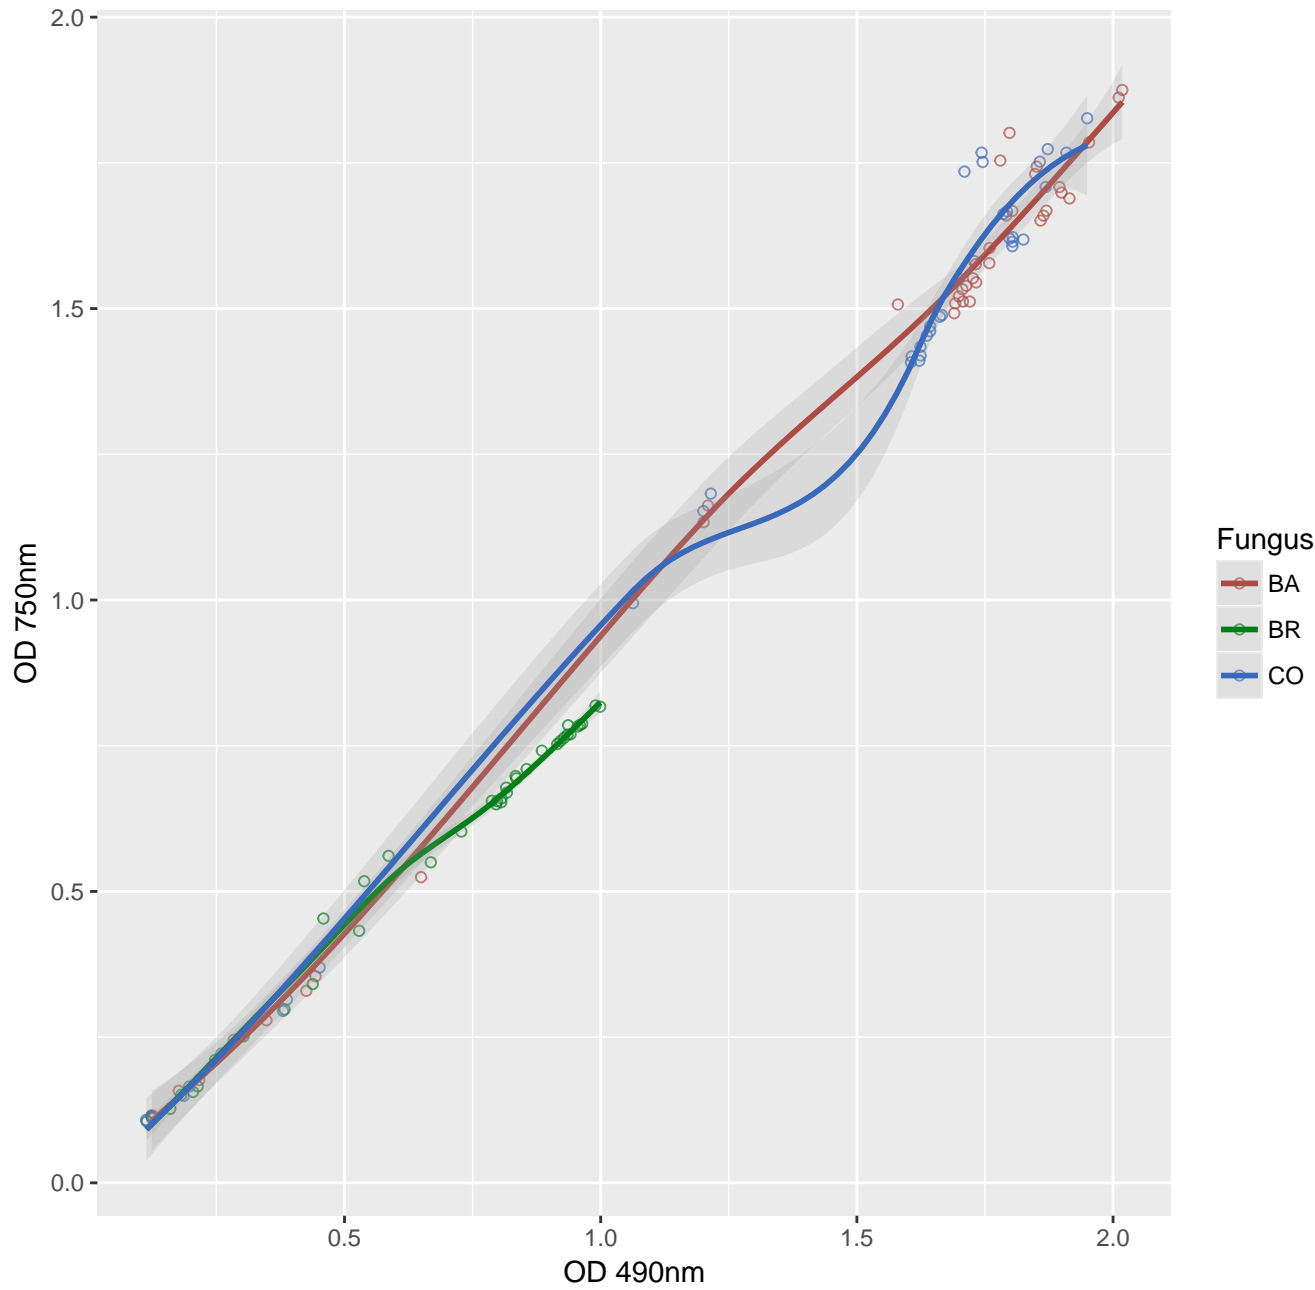

# Dextrin

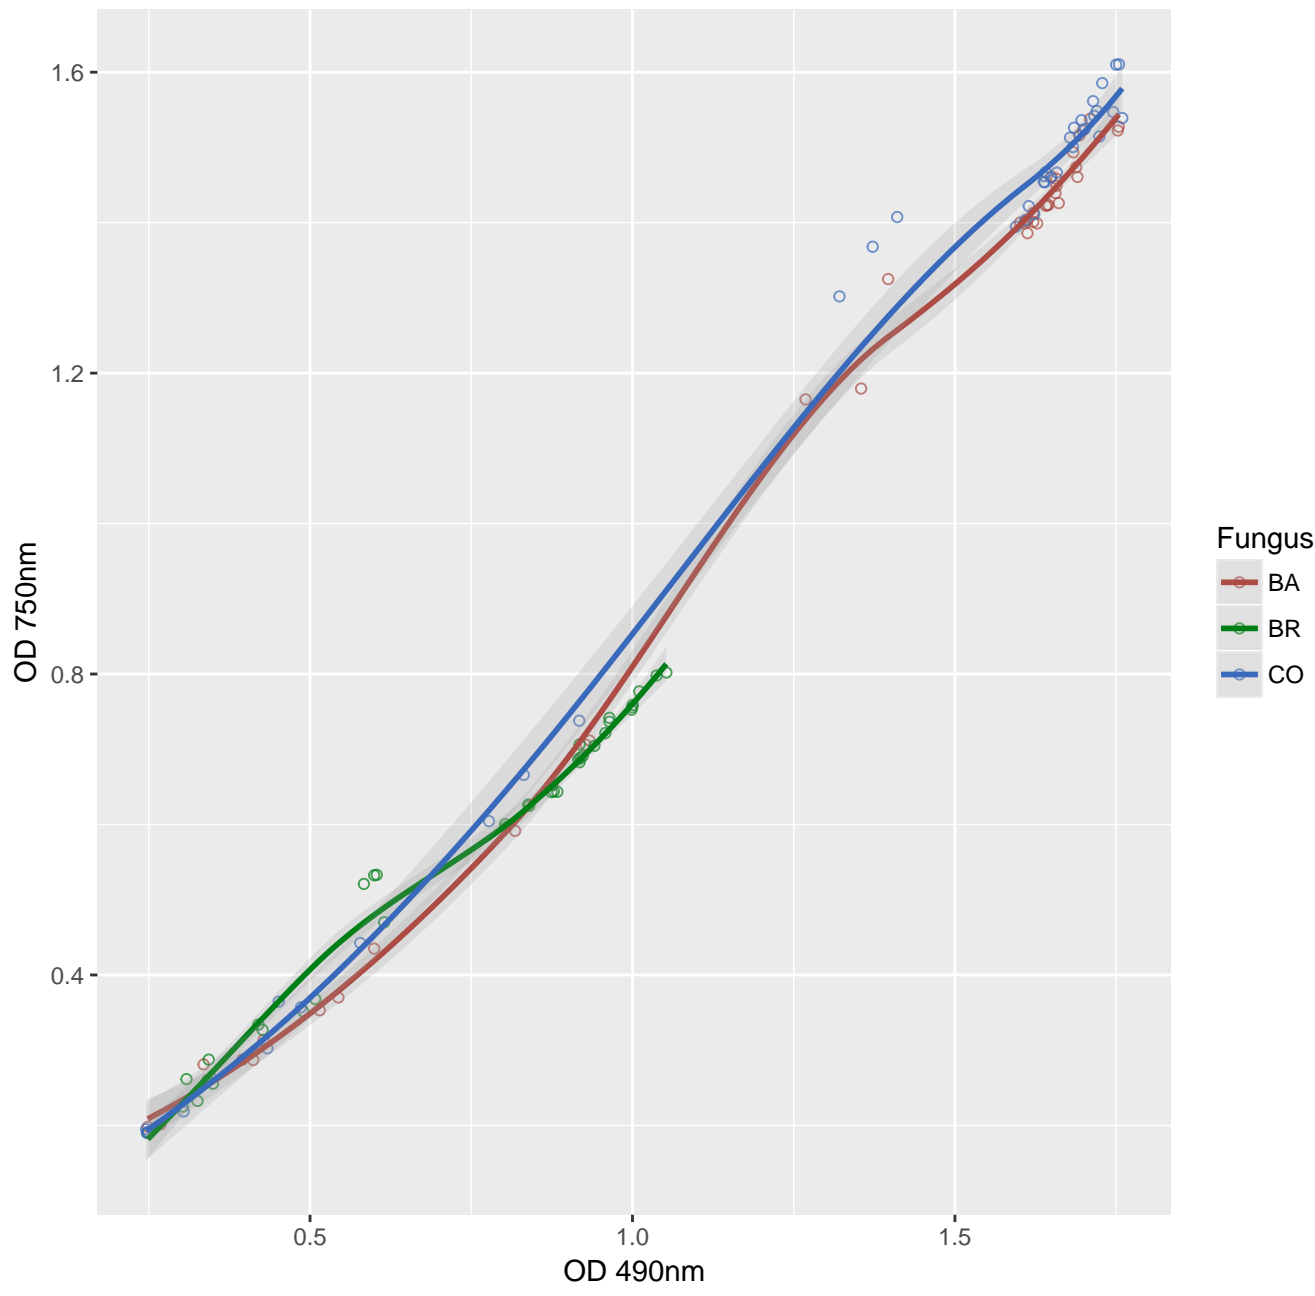

# D.Fructose

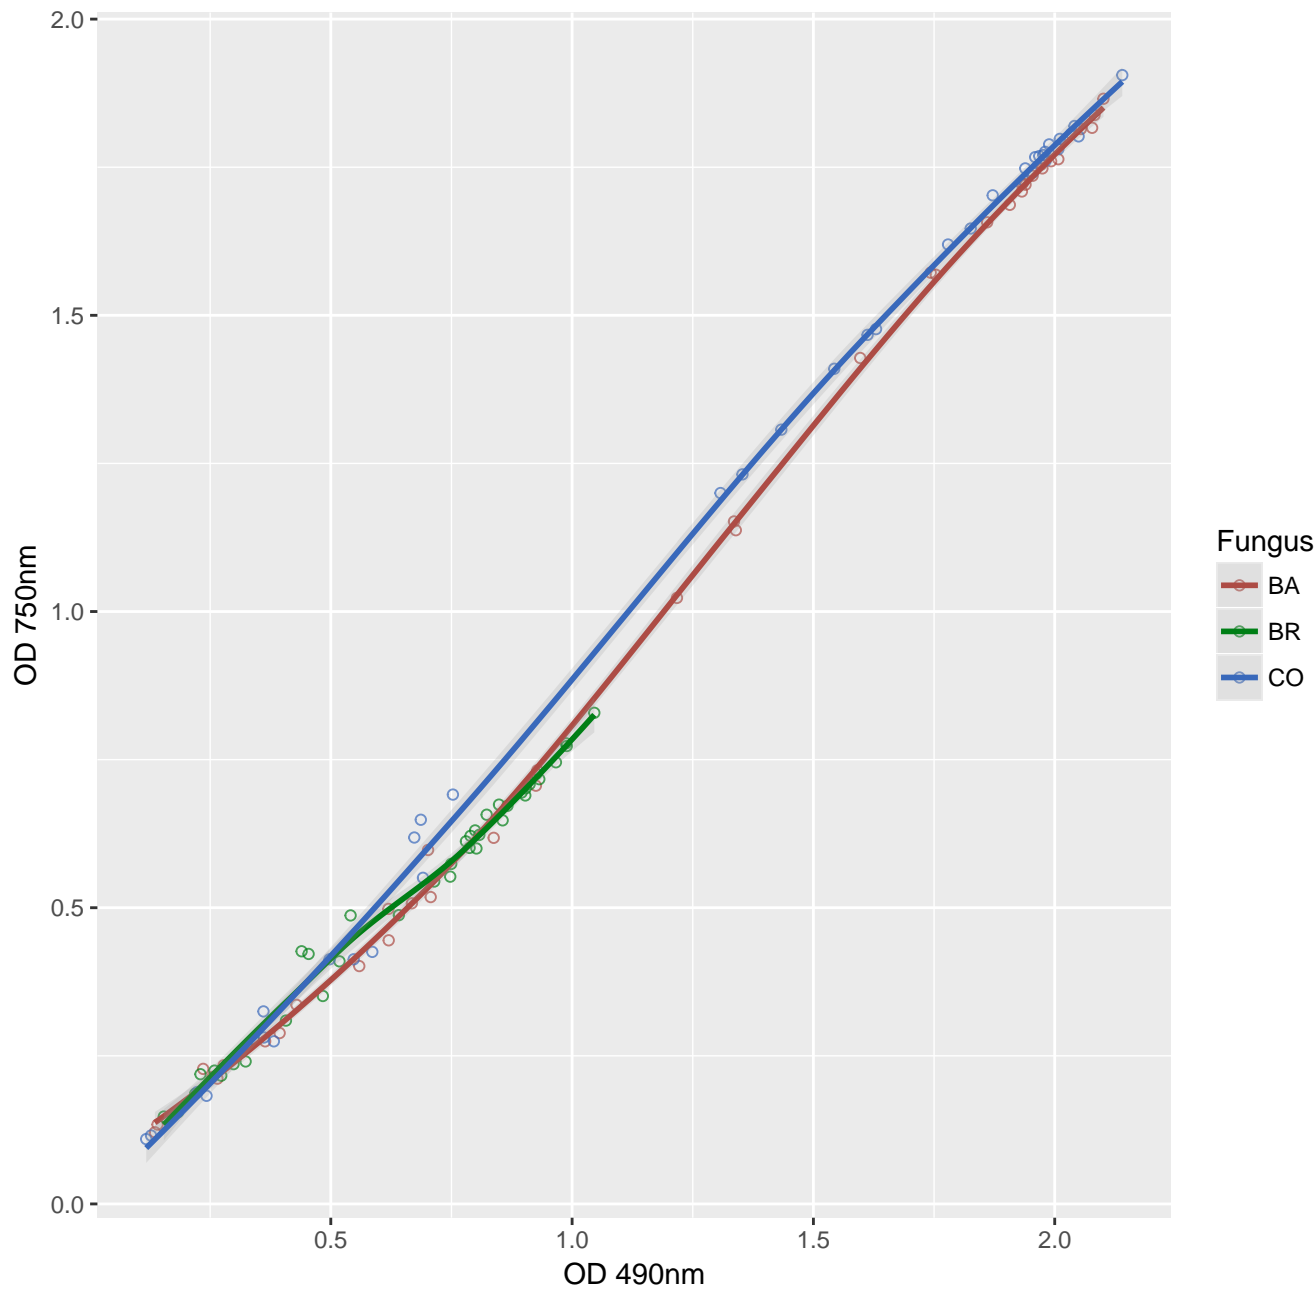

# D.Galactose

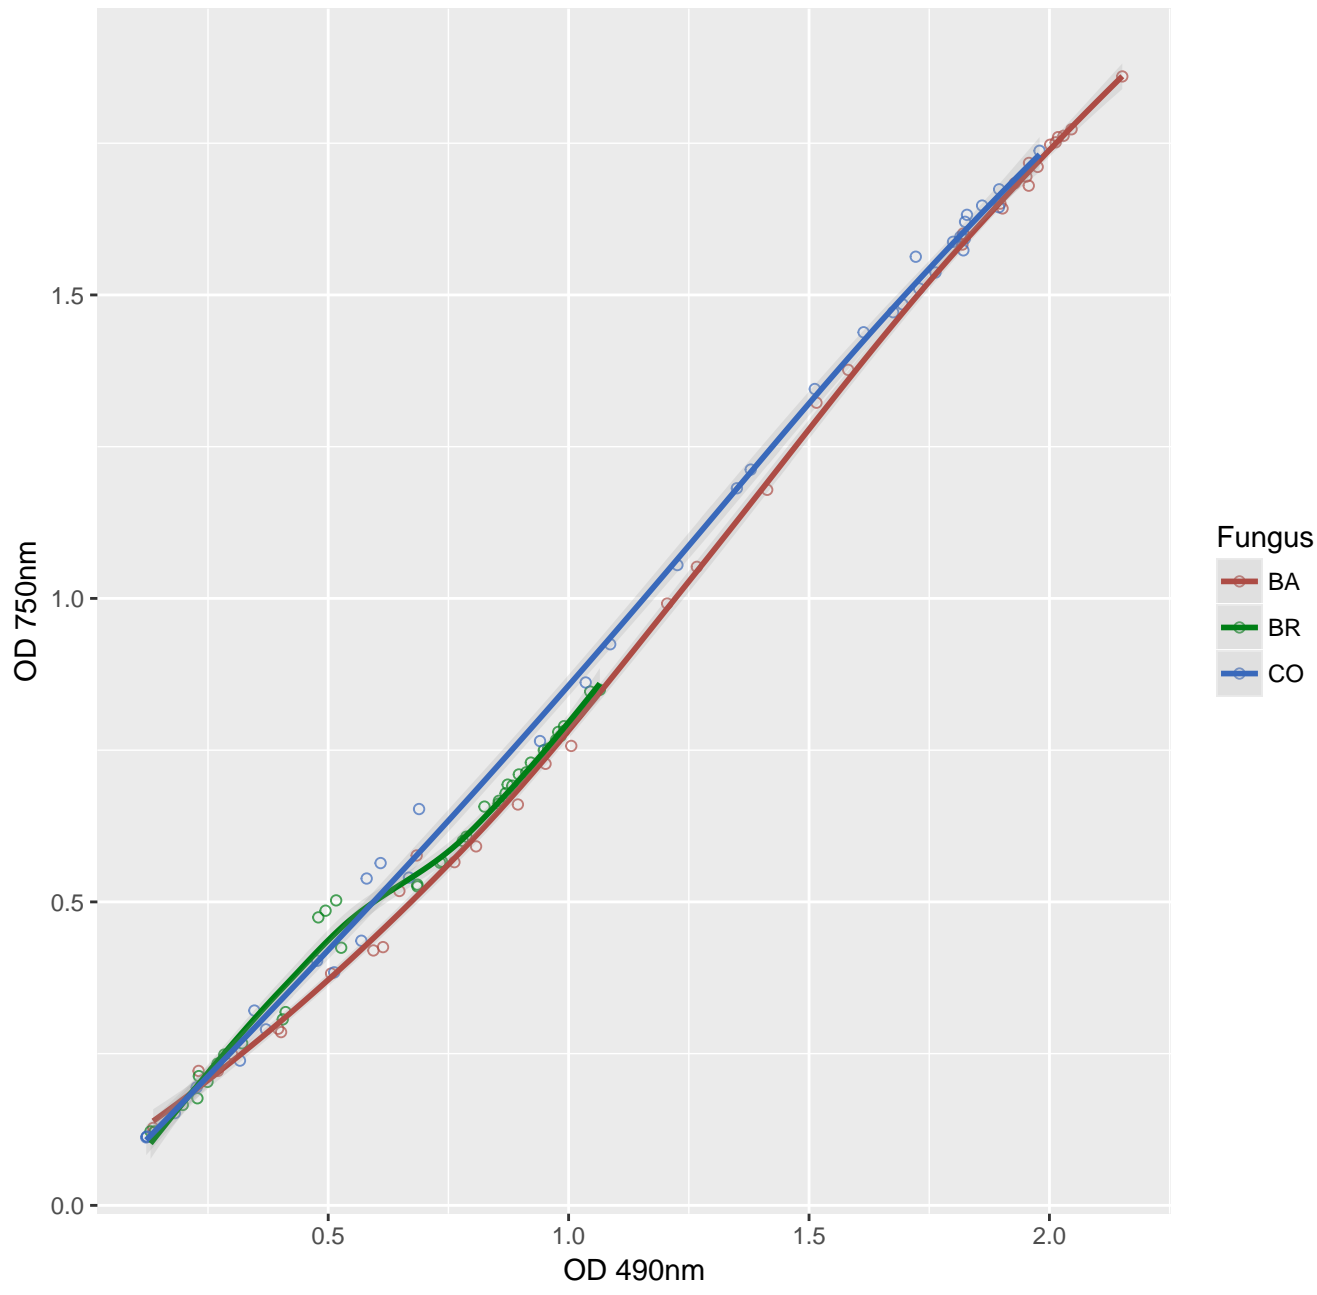

# D.GalacturonicAcid

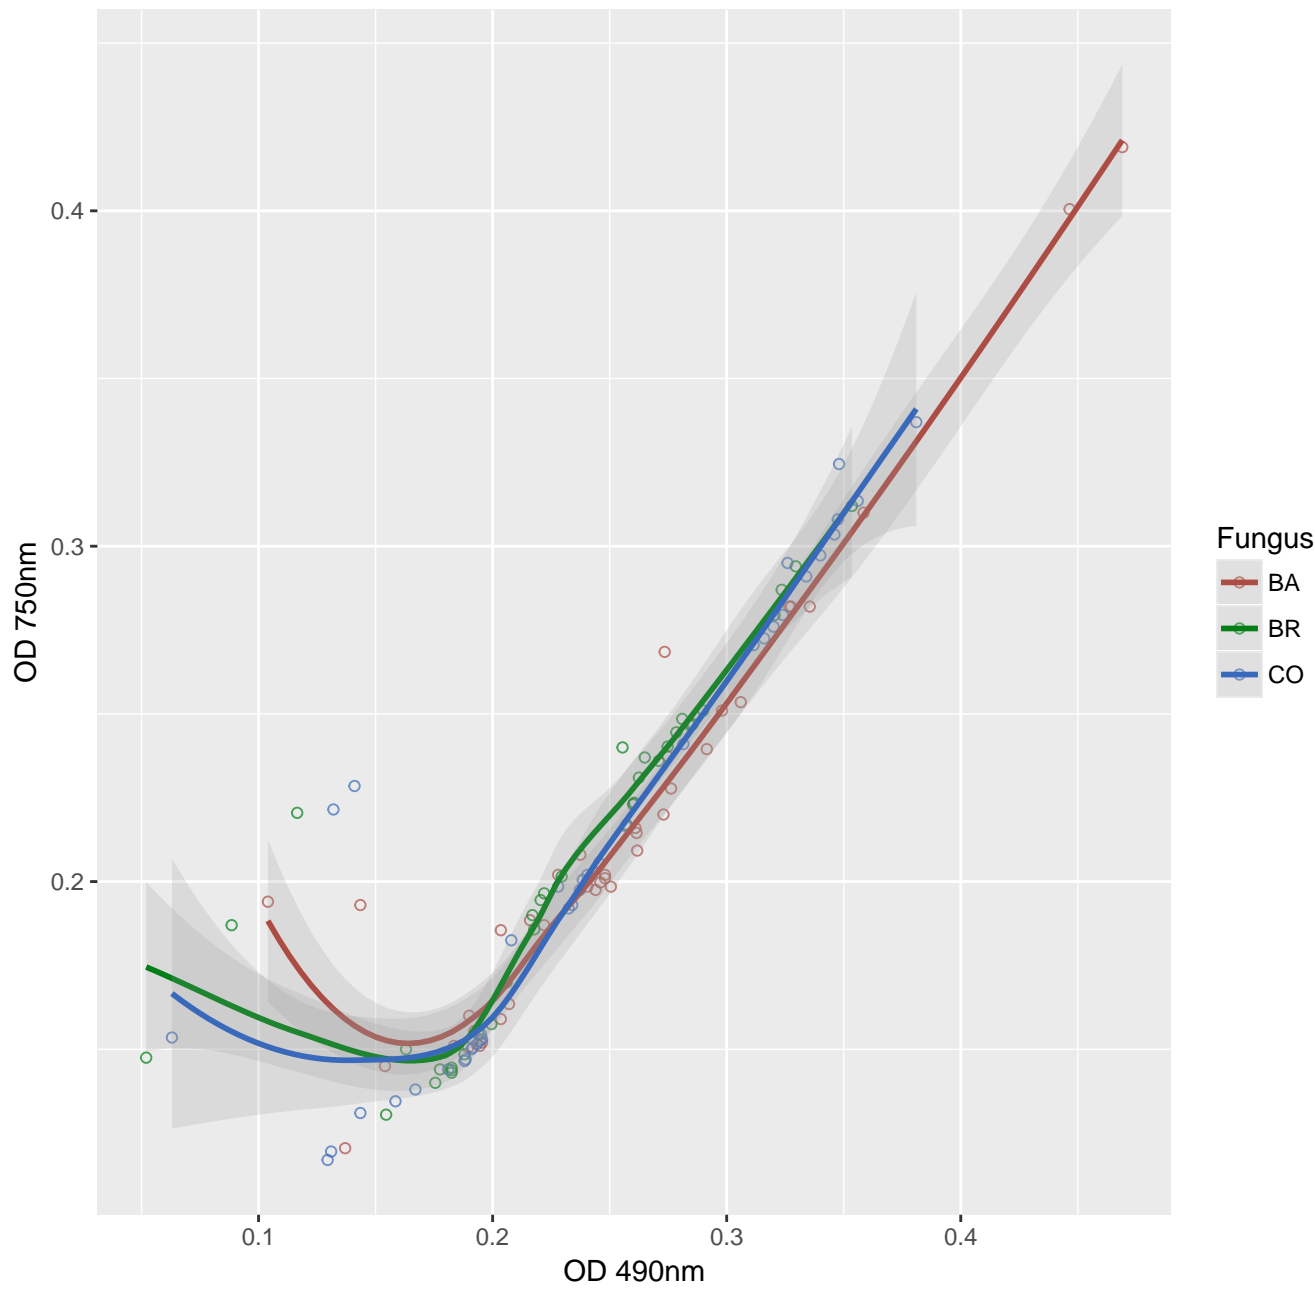

# D.GluconicAcid

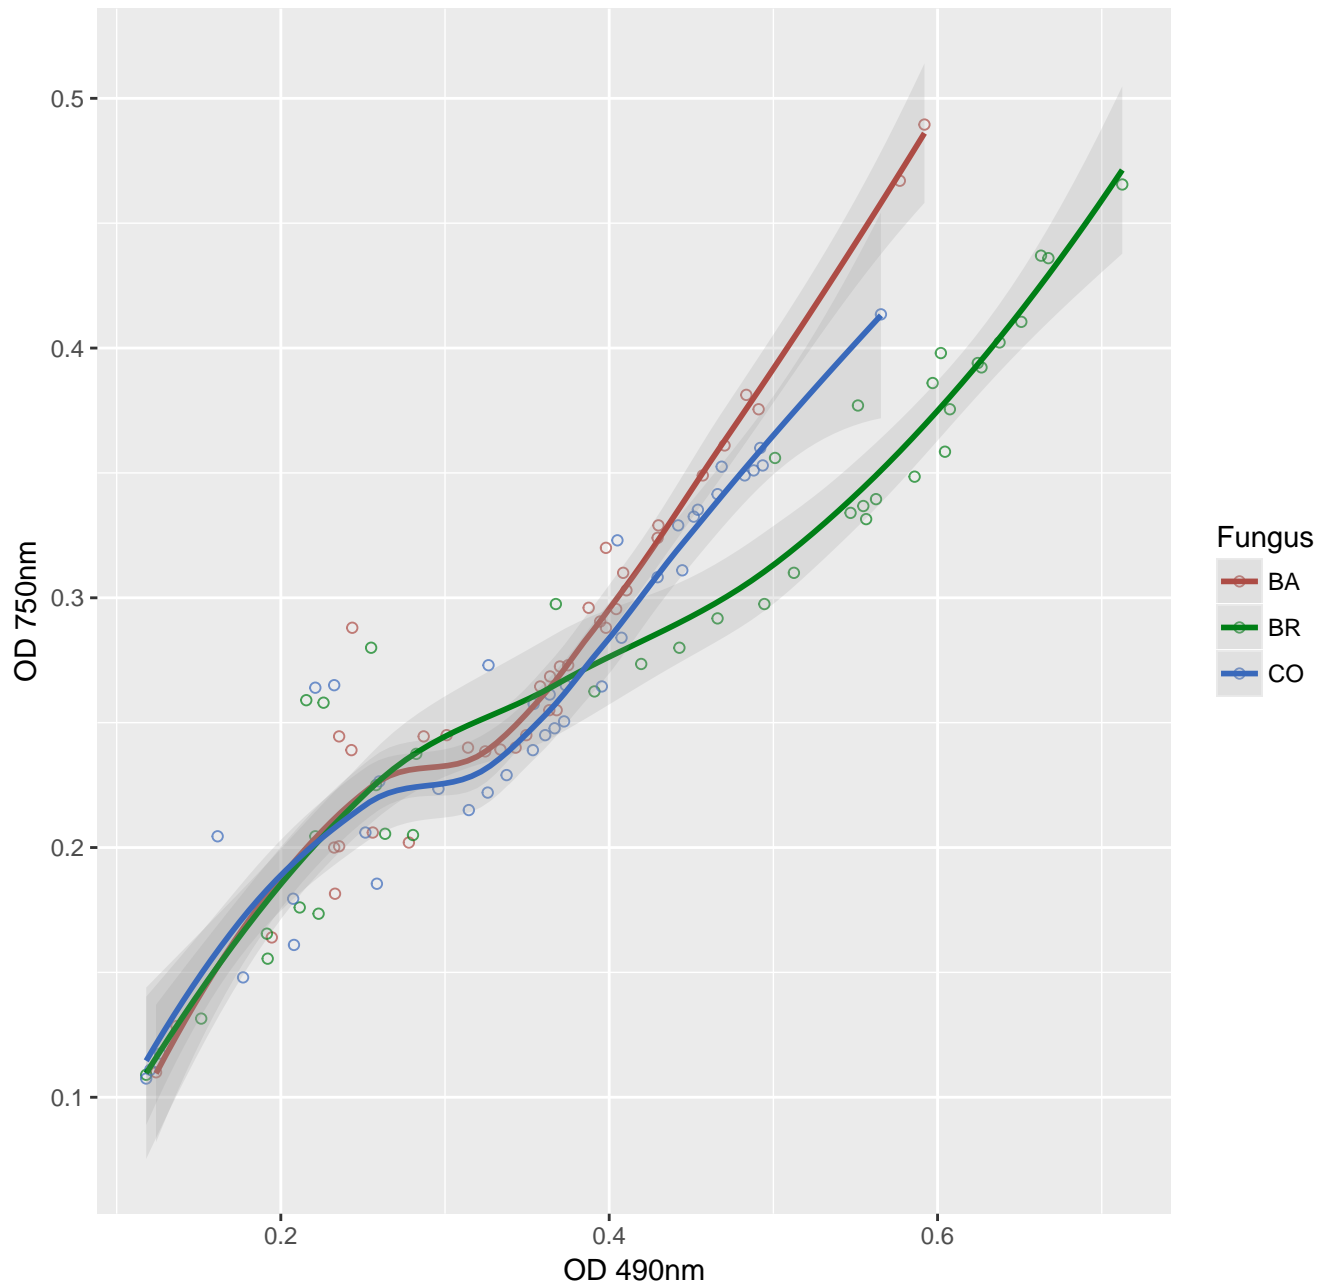

# D.Glucosamine

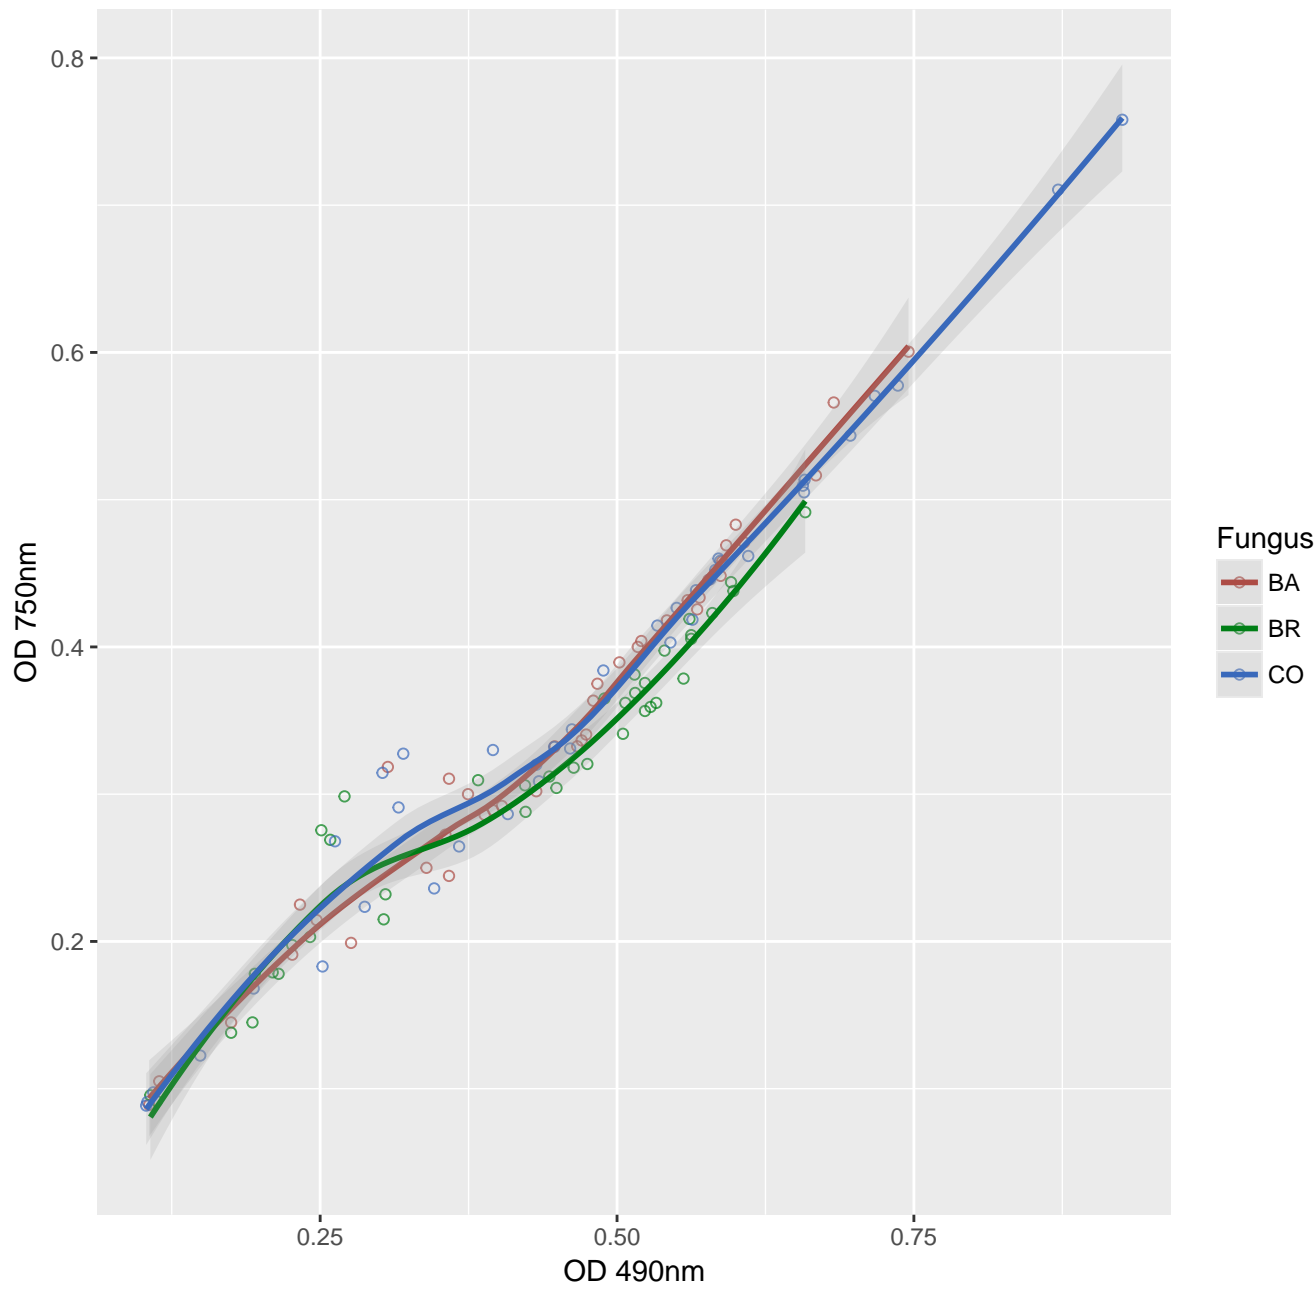

# D.GlucuronicAcid

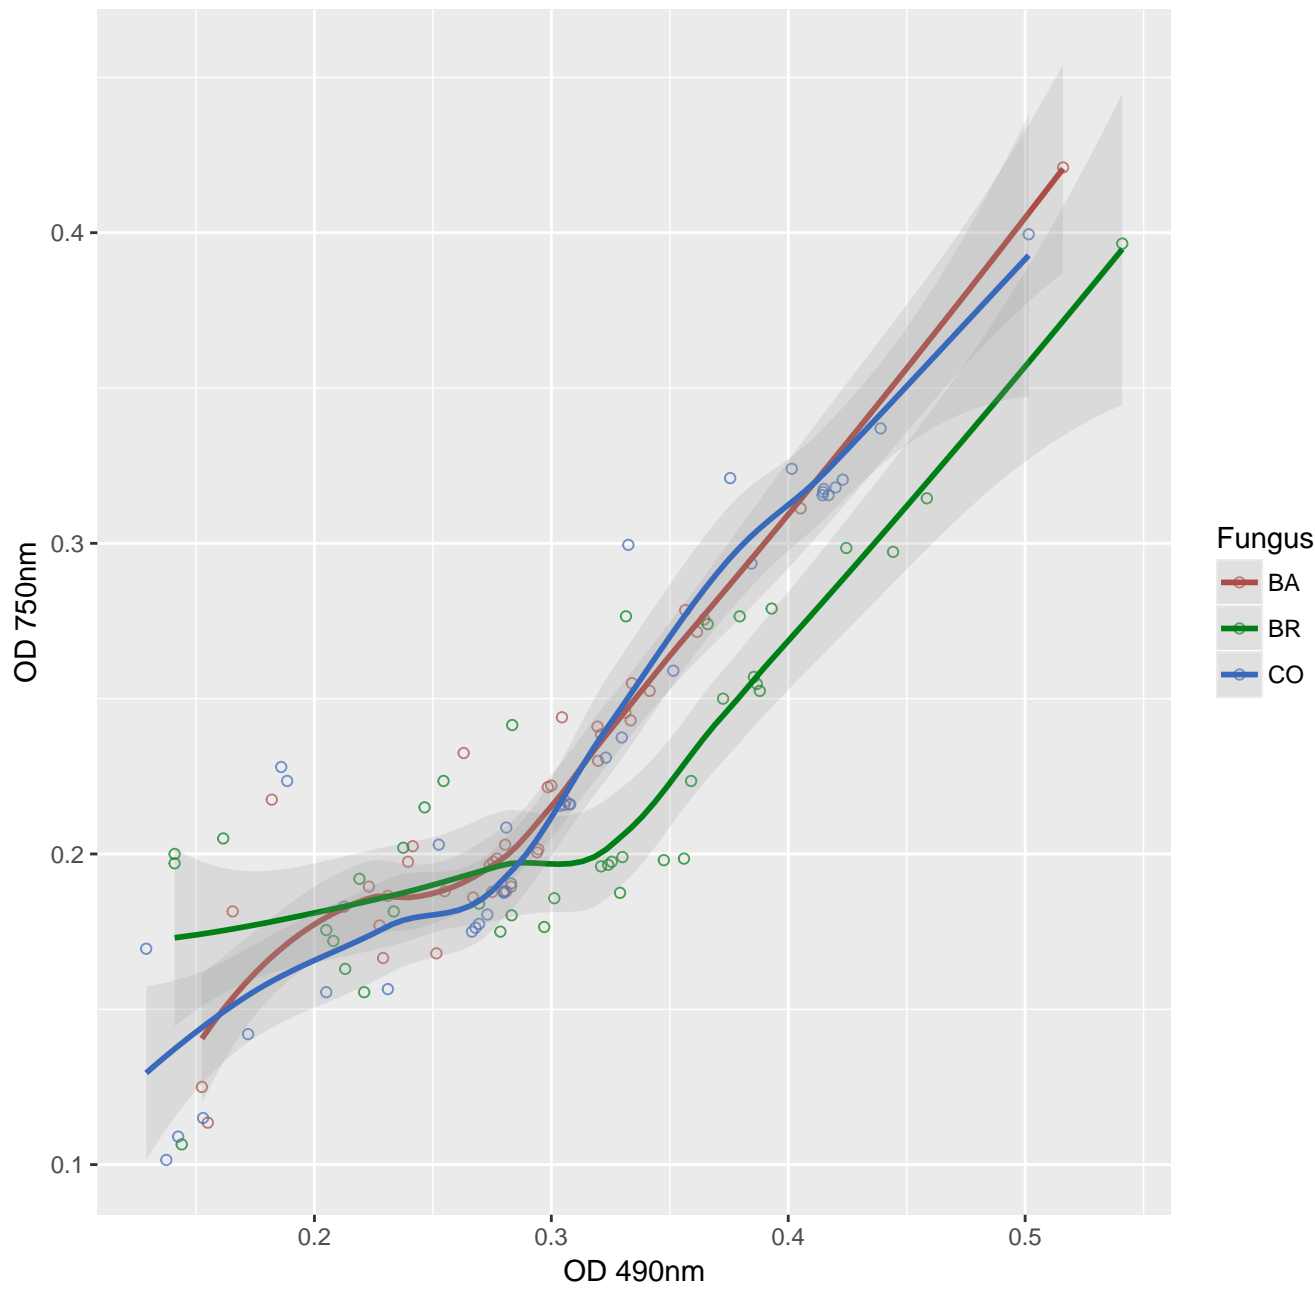



# D.LacticAcidMethylEster

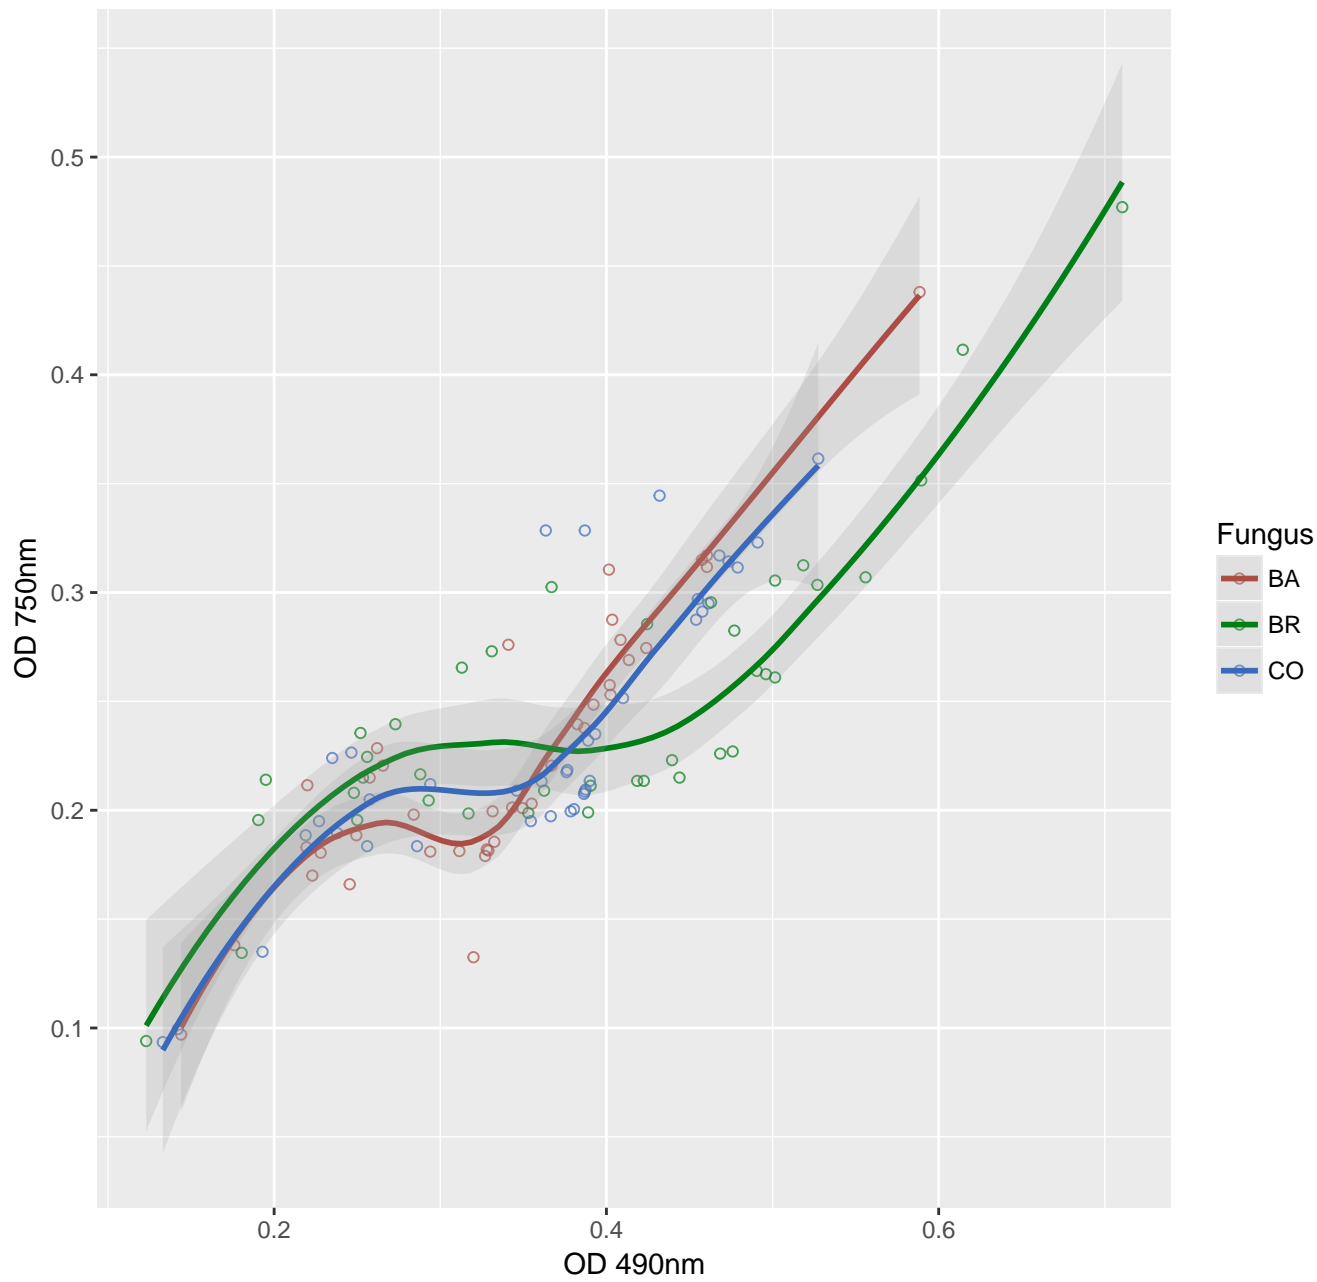

# D.MalicAcid

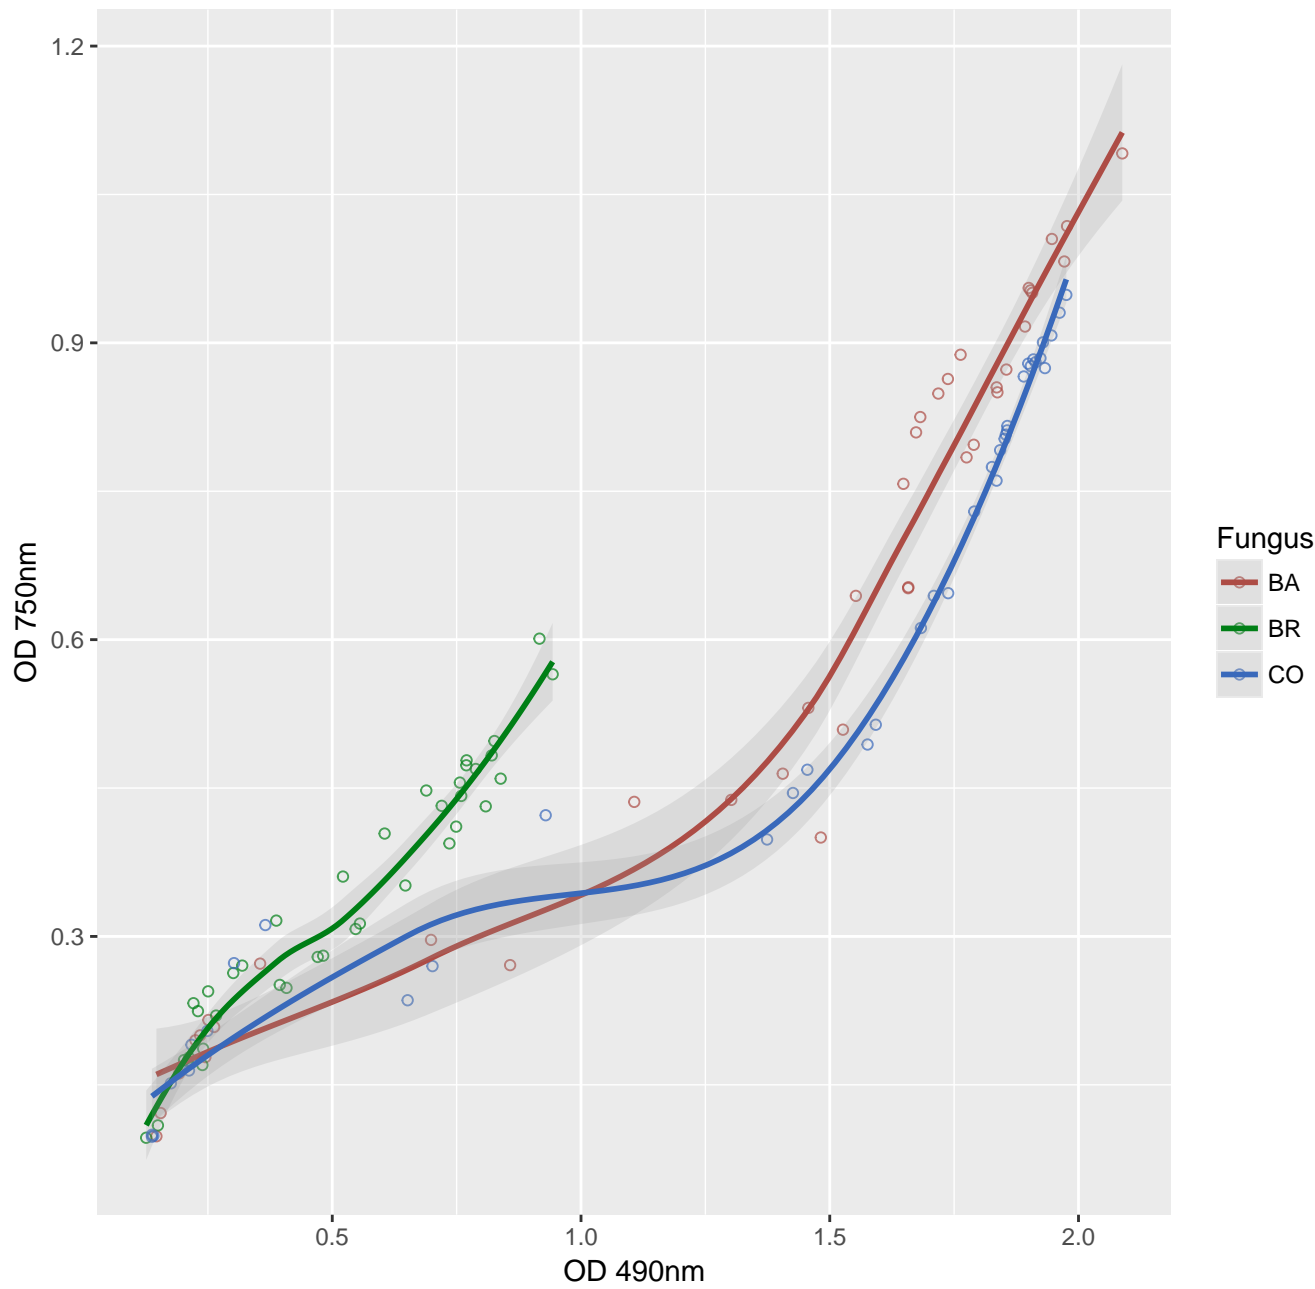

# D.Mannitol

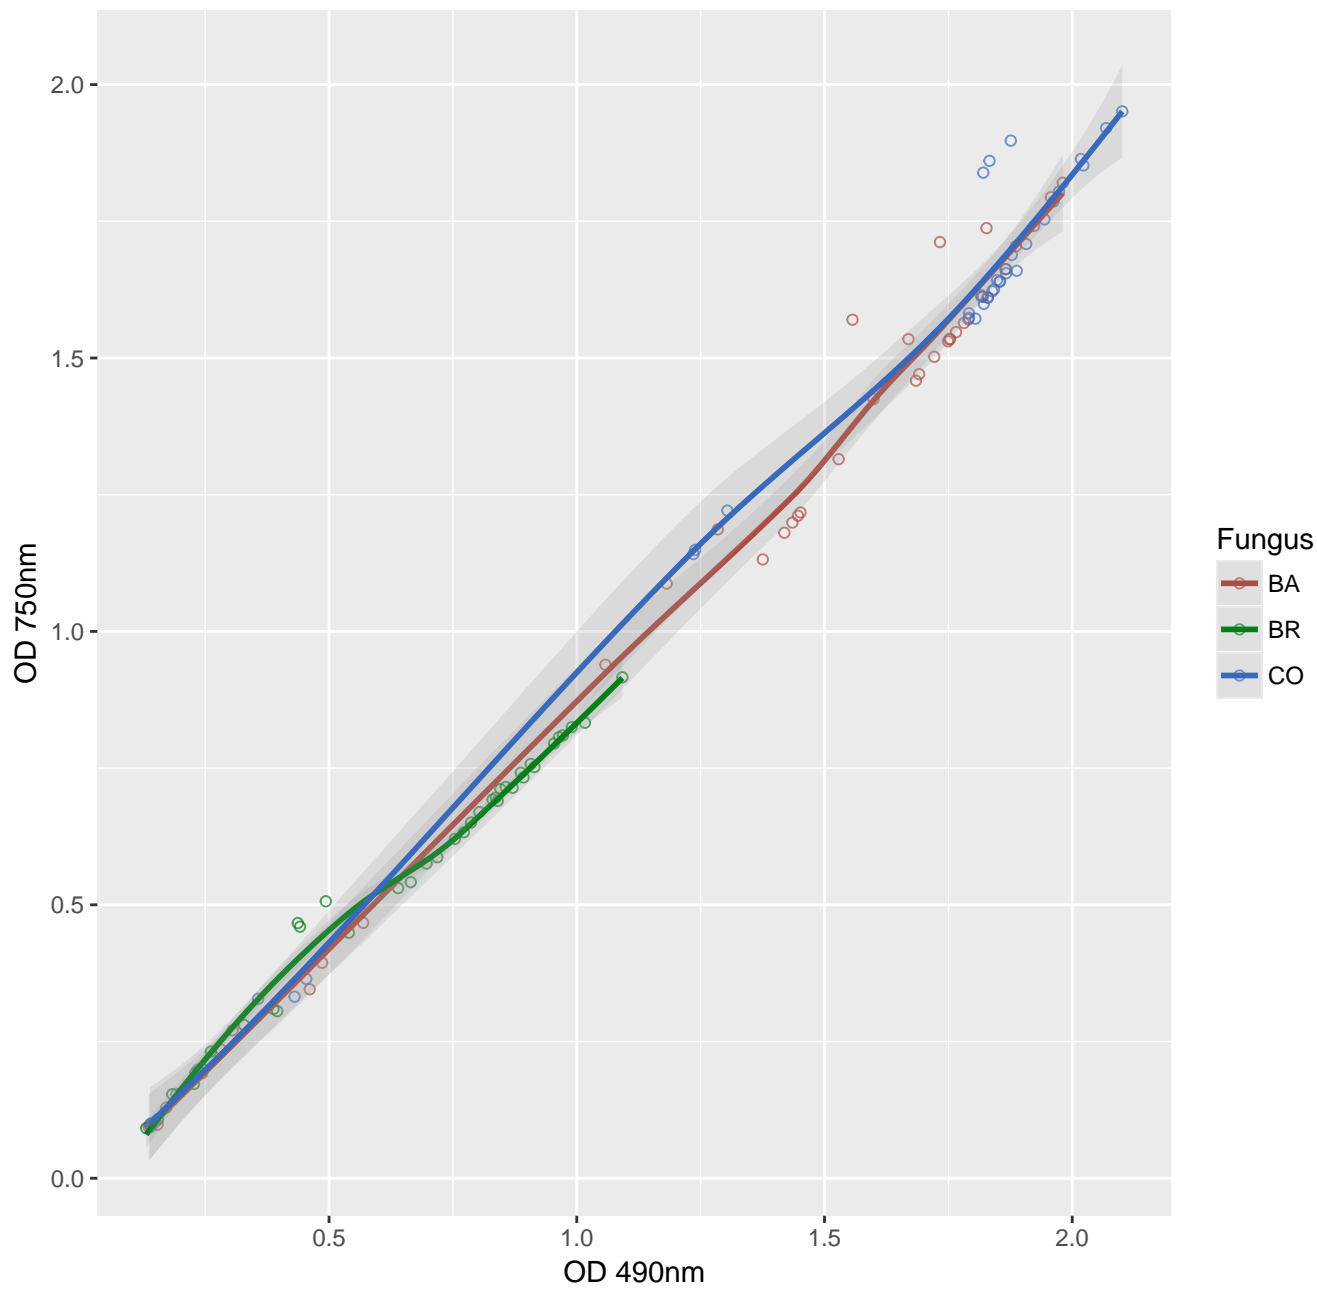

# D.Mannose

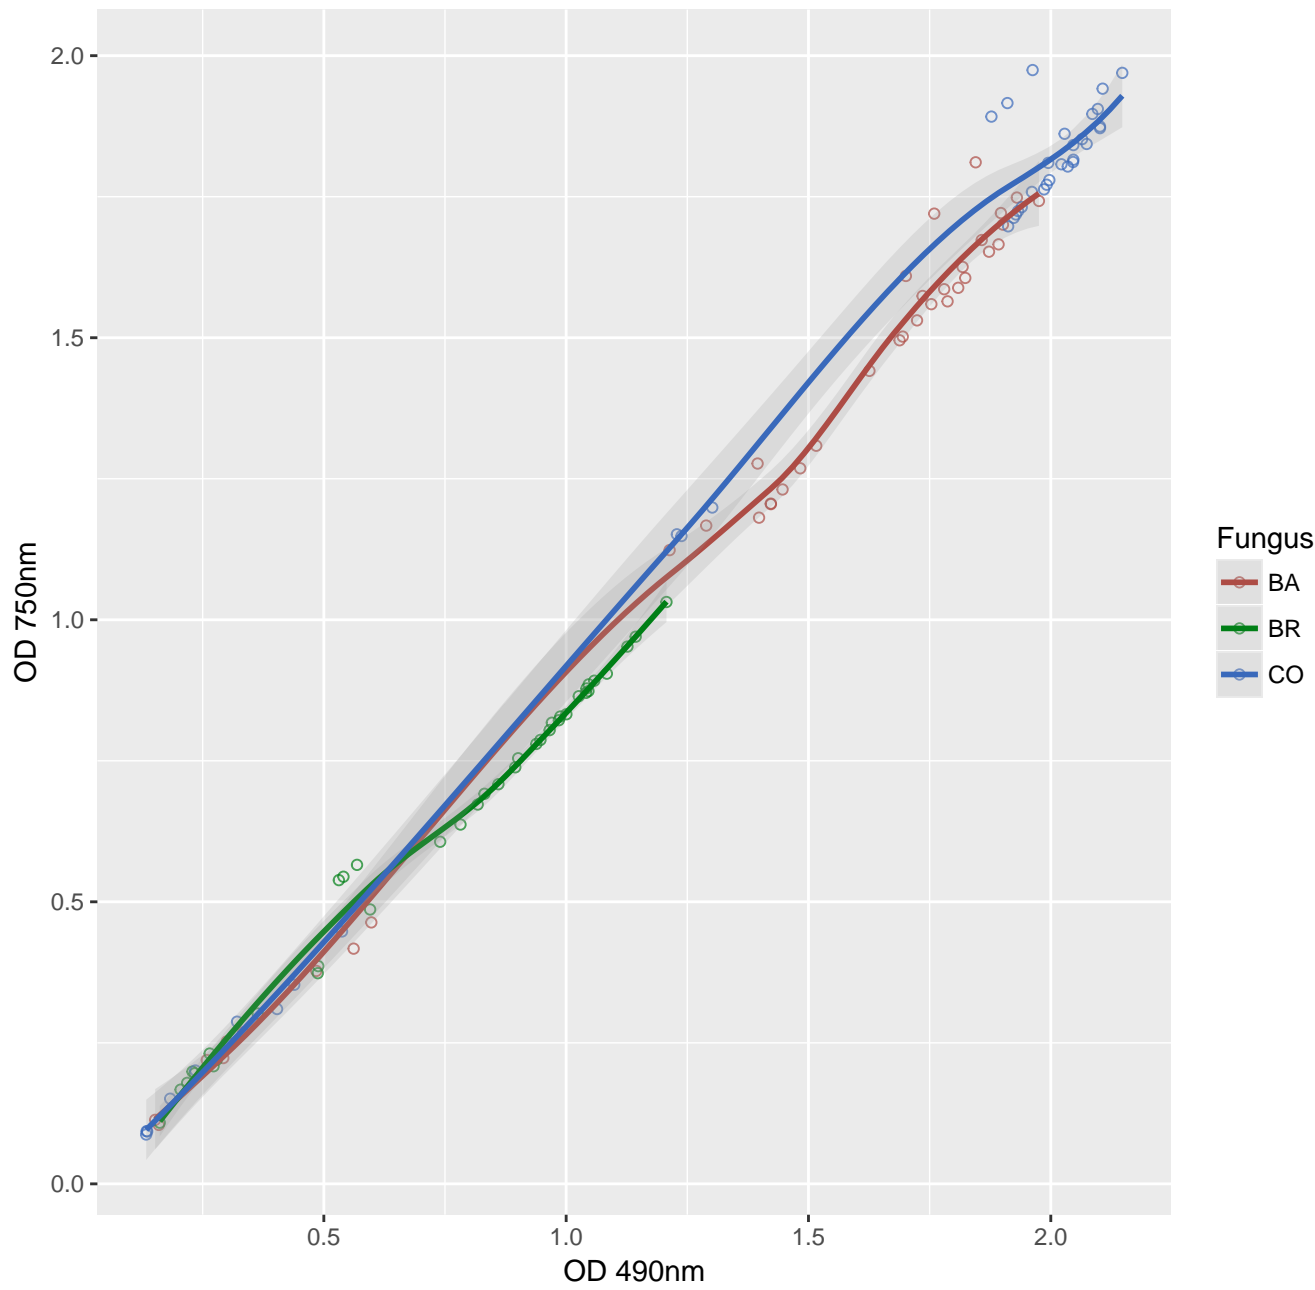

# D.Melezitose

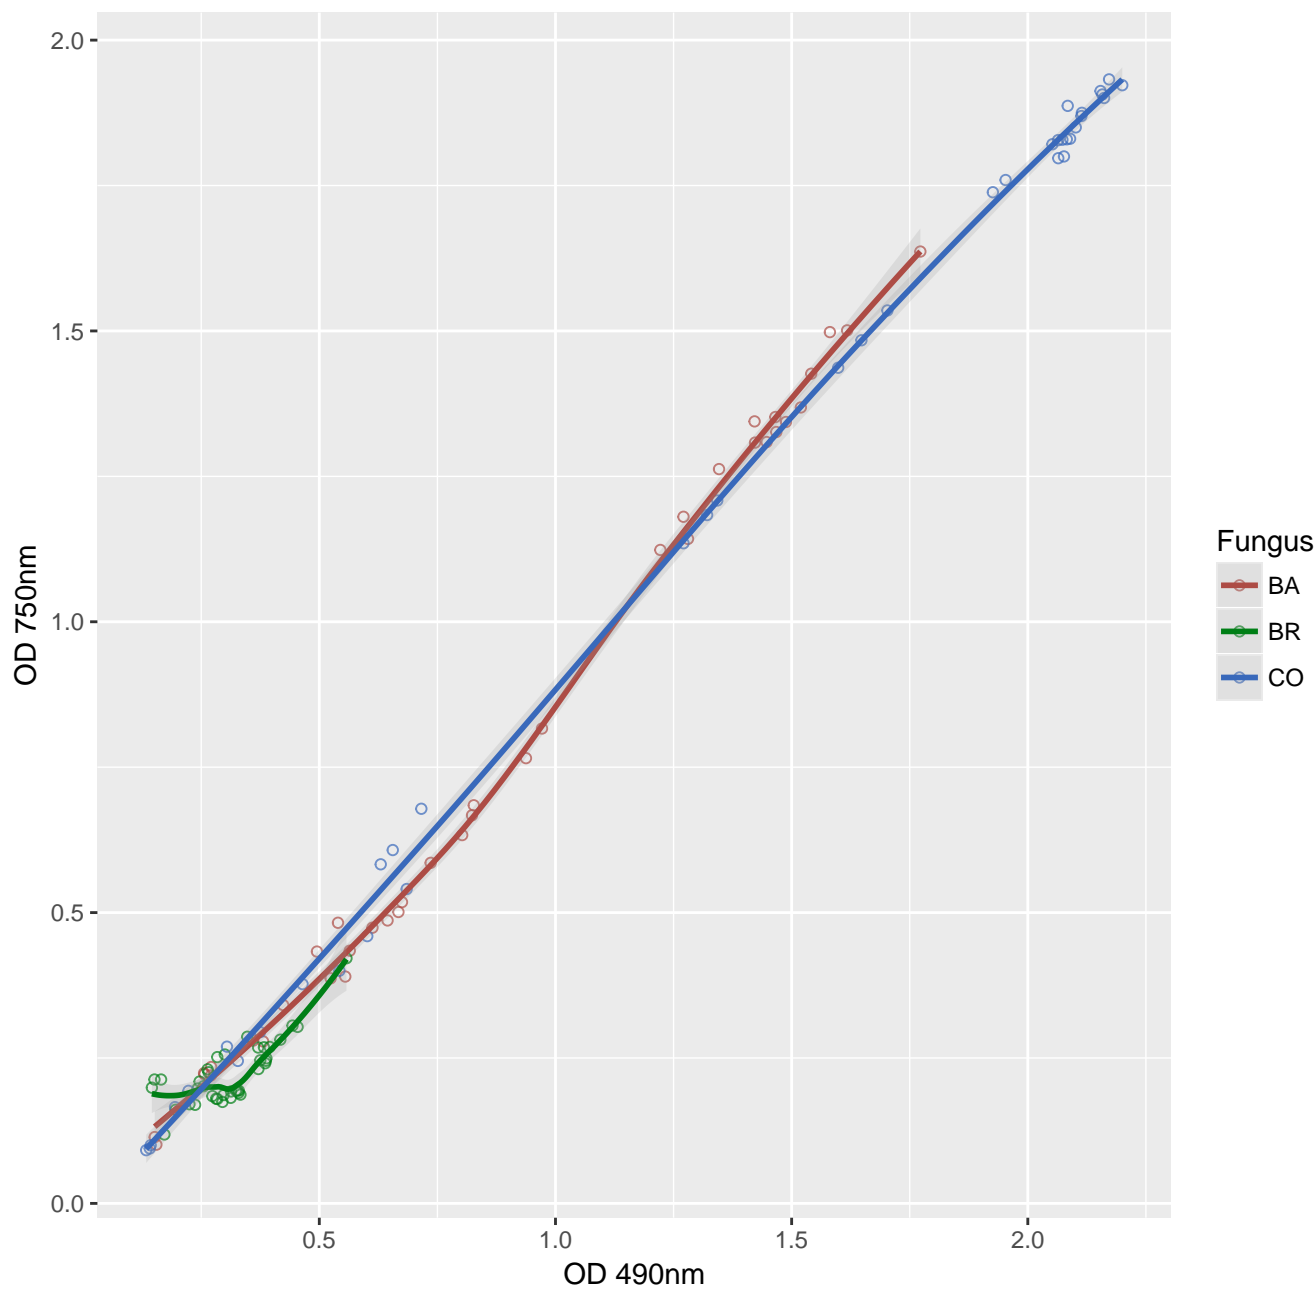

# D.Melibiose

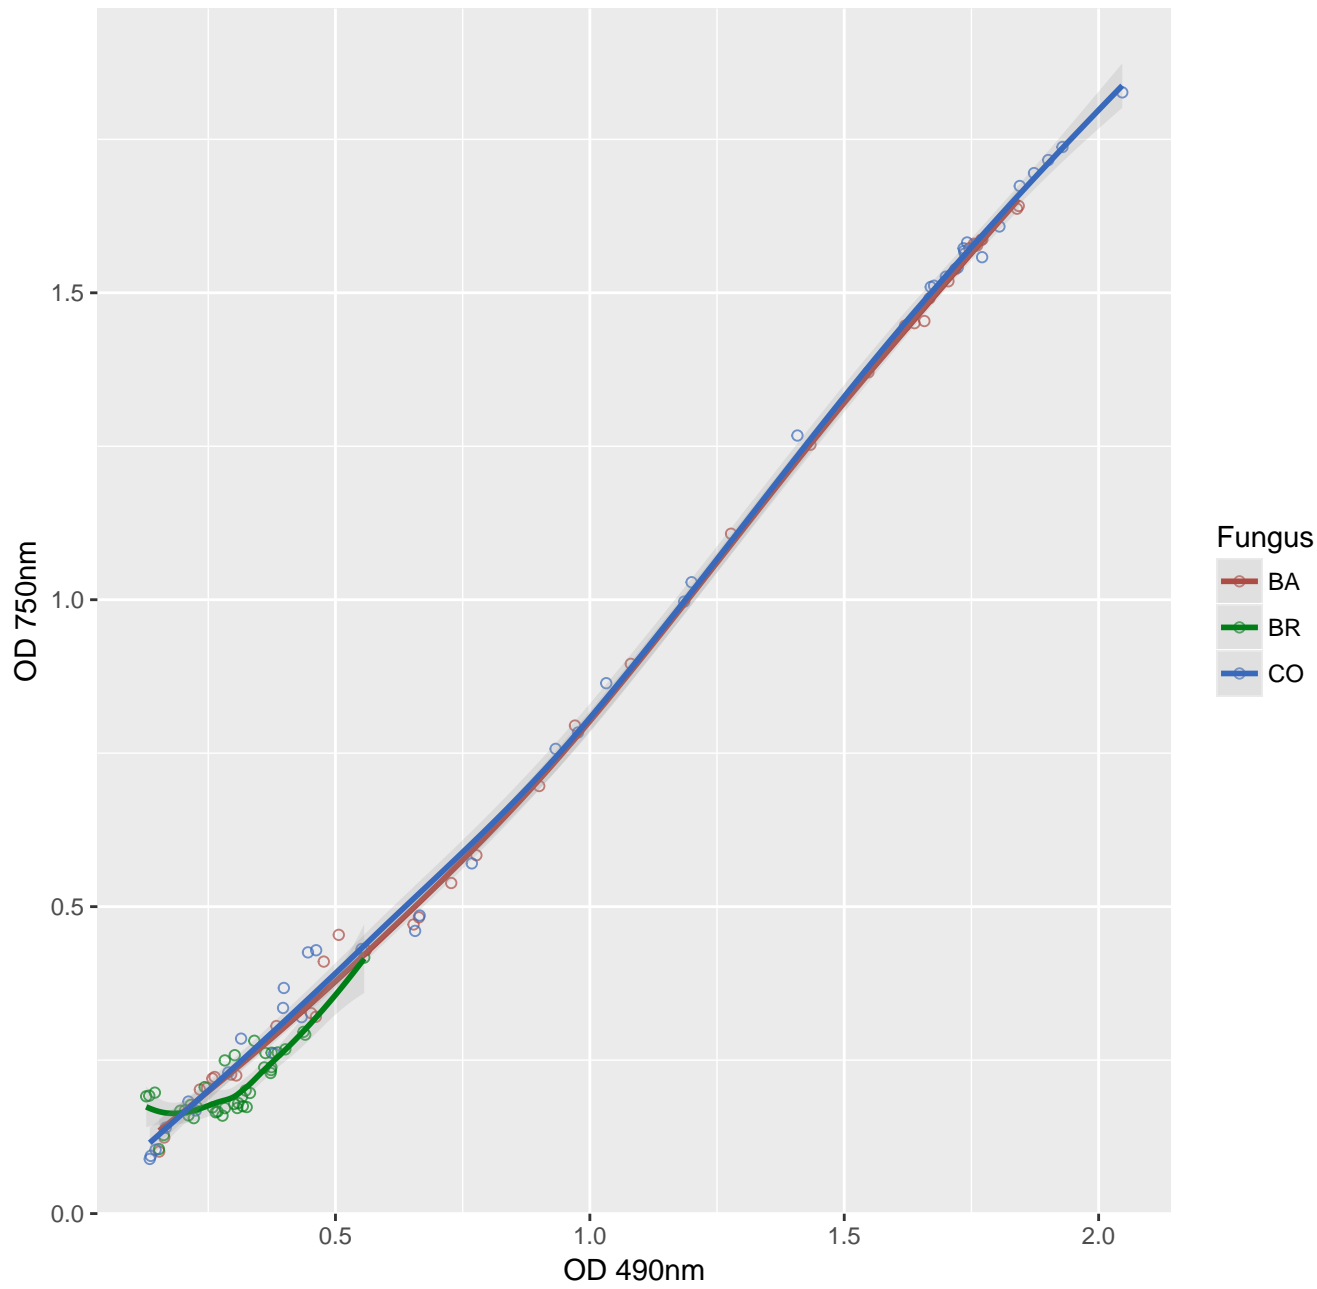

# D.Psicose

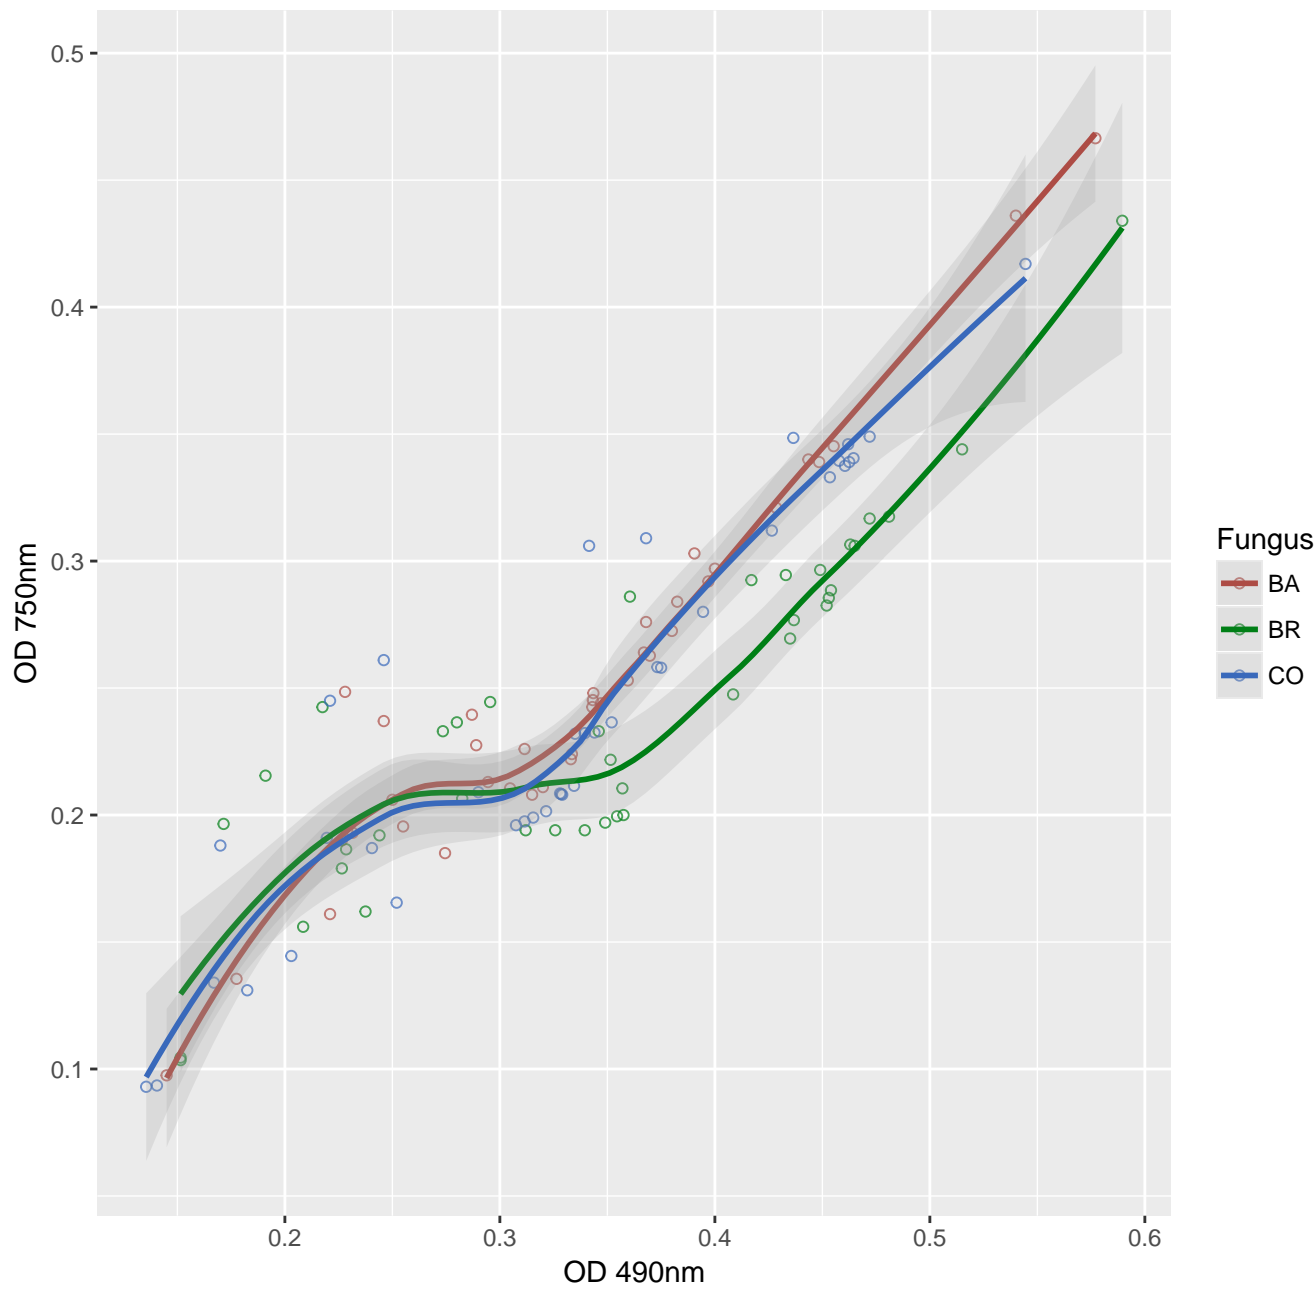

# D.Raffinose

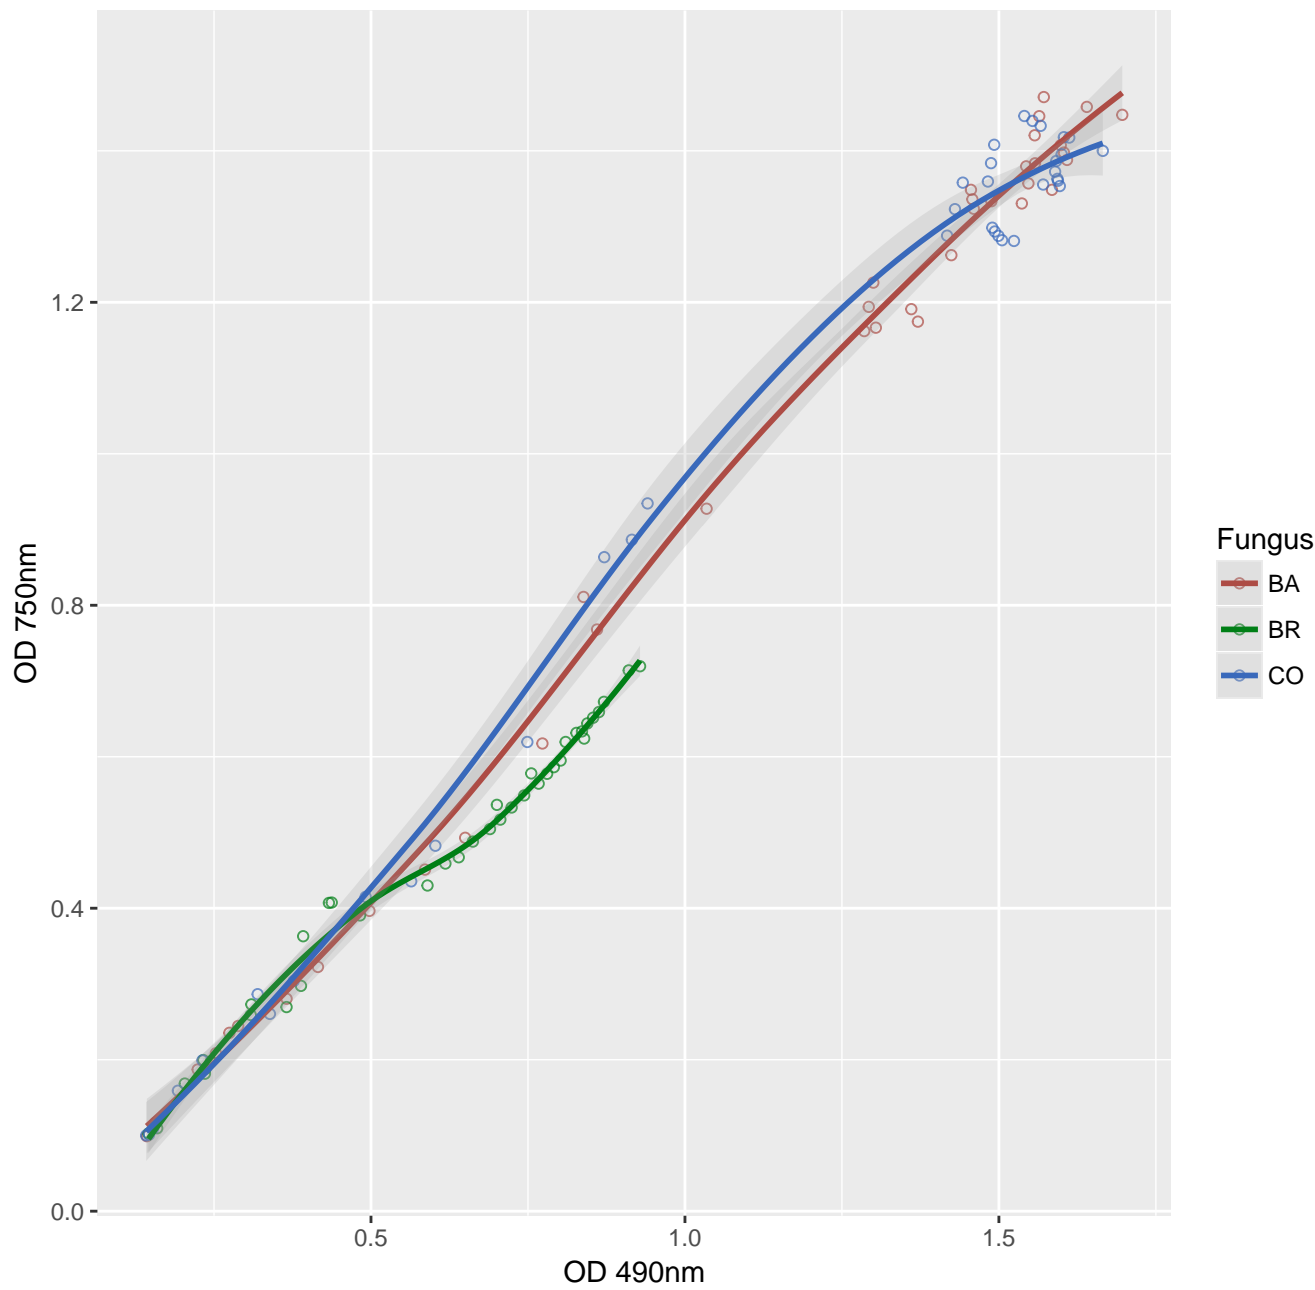



# D.Ribose

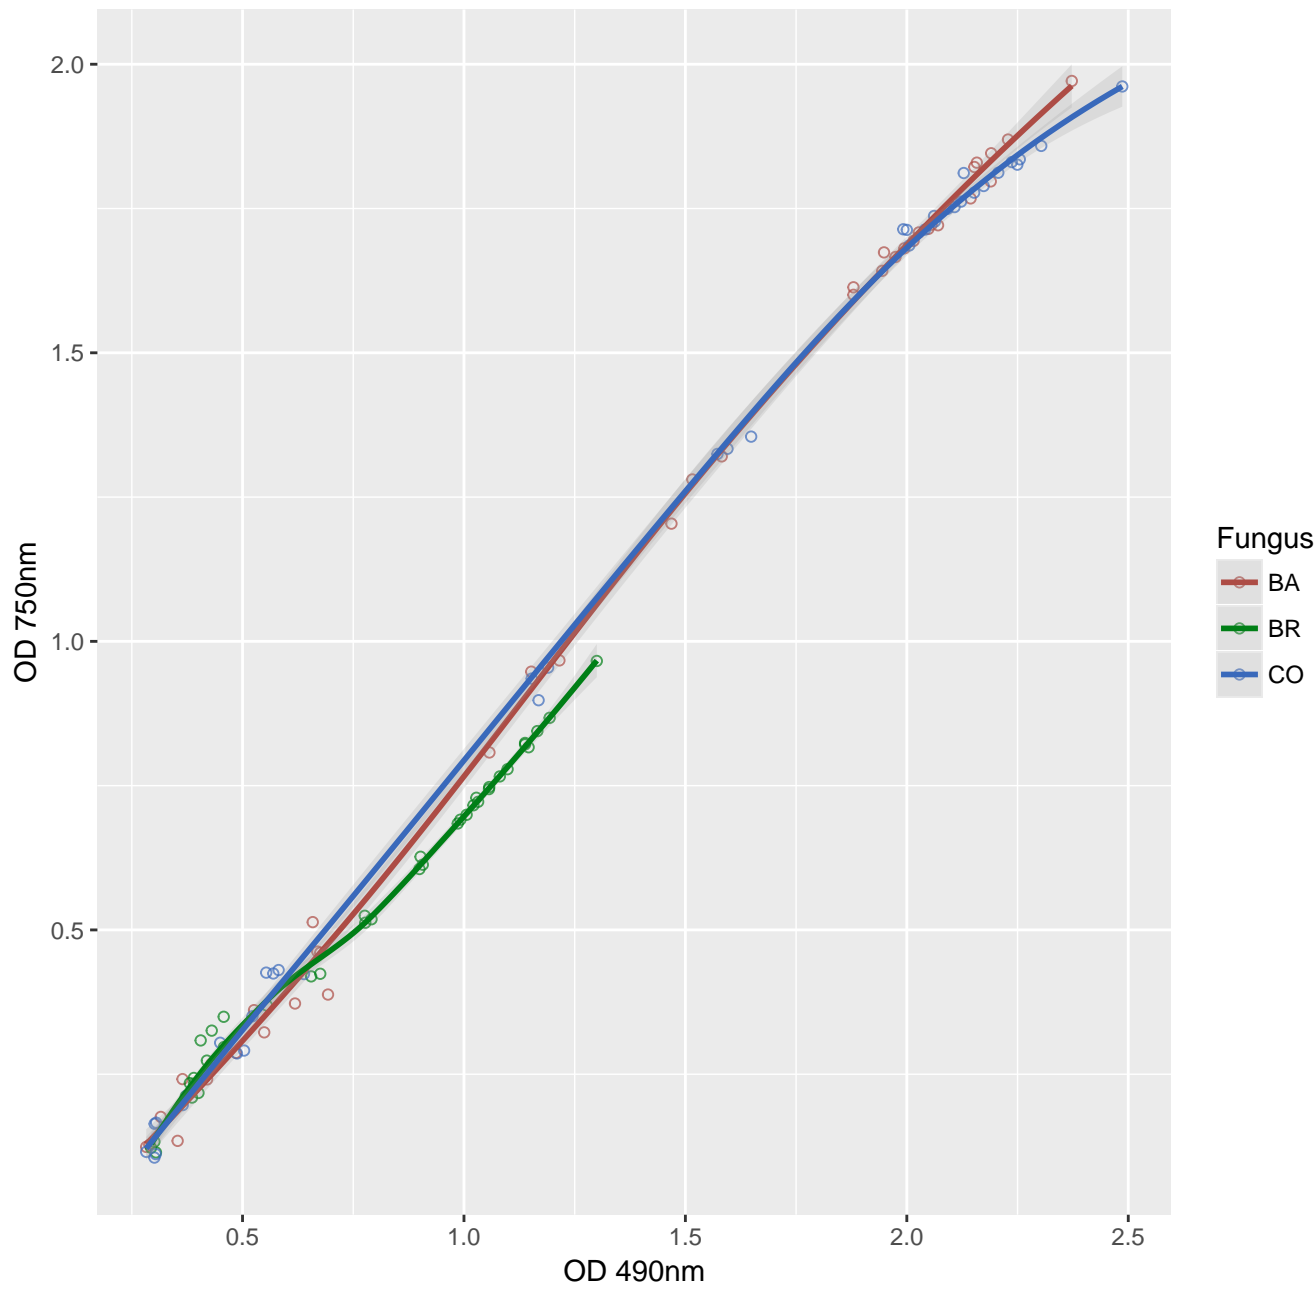

# D.SaccharinAcid

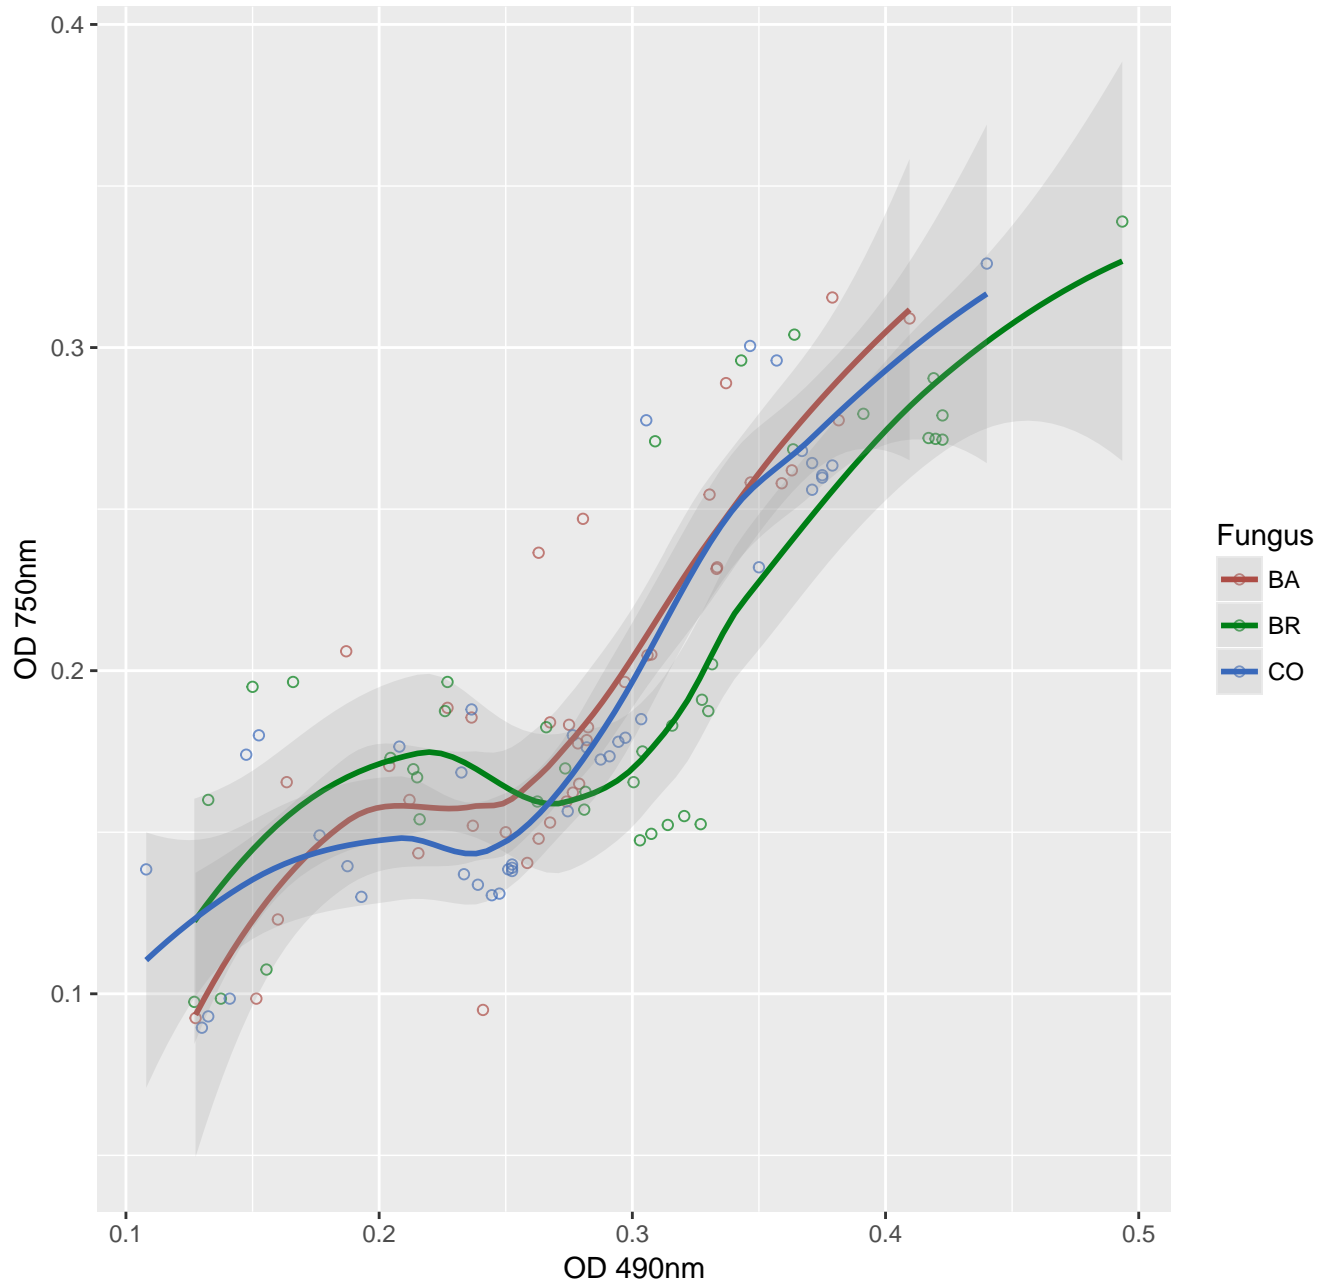

# D.Sorbitol

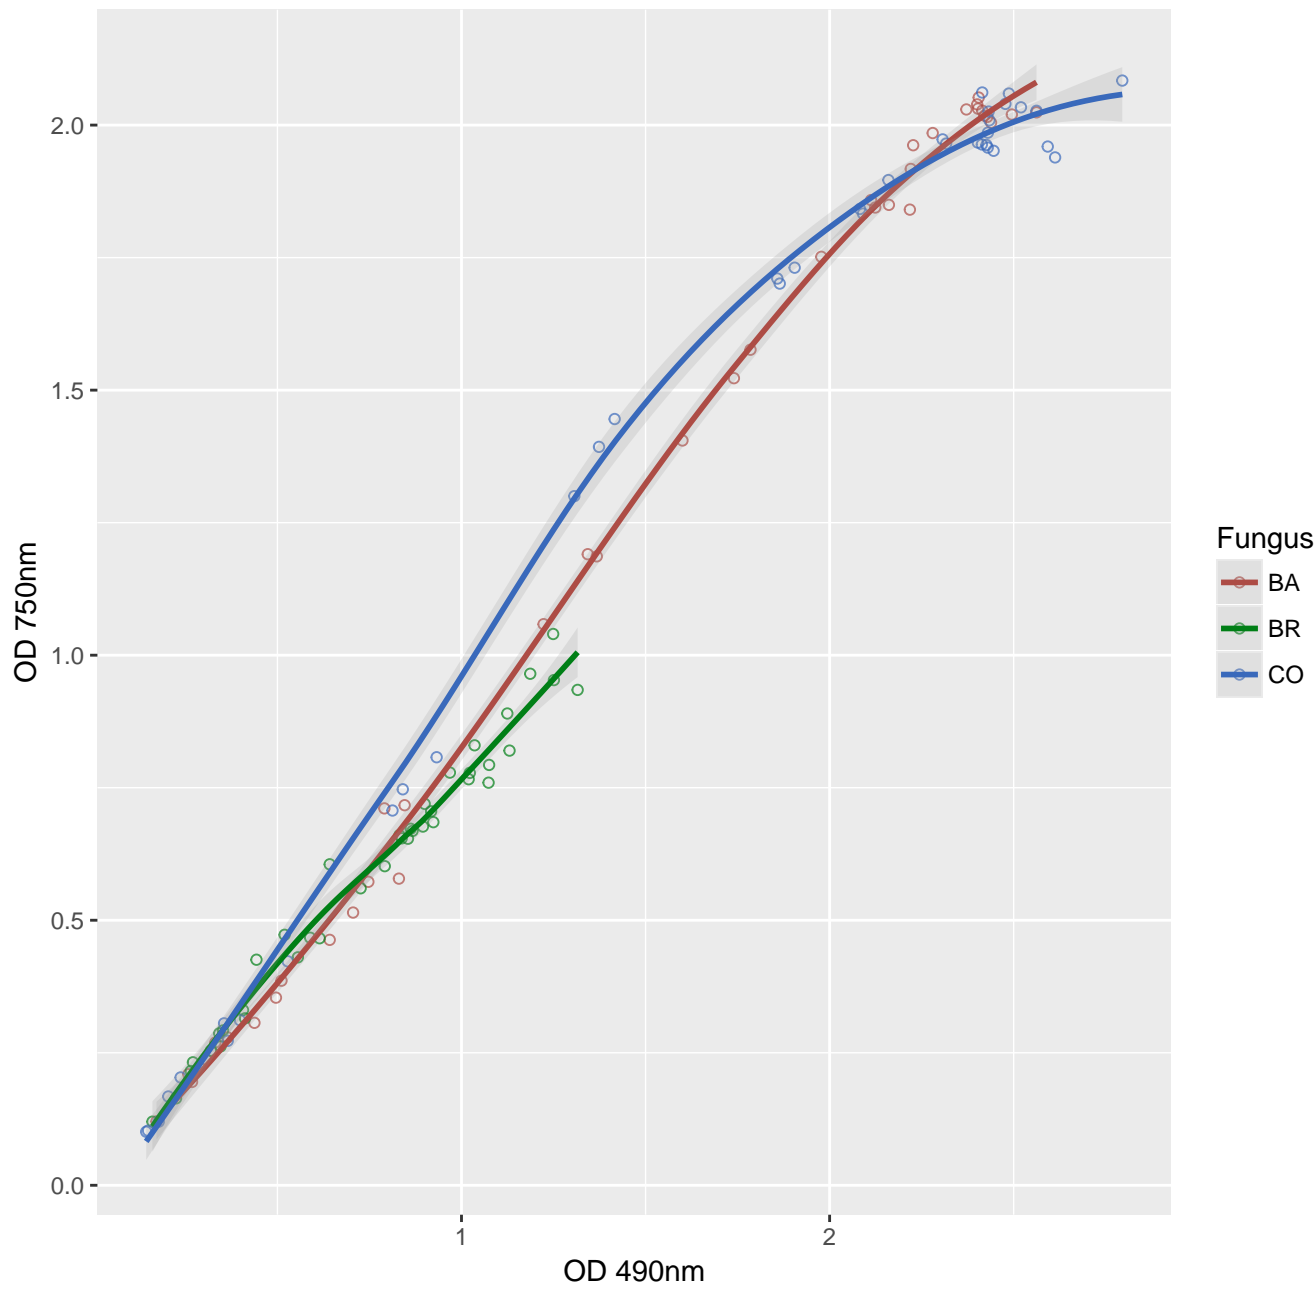

# D.Tagatose

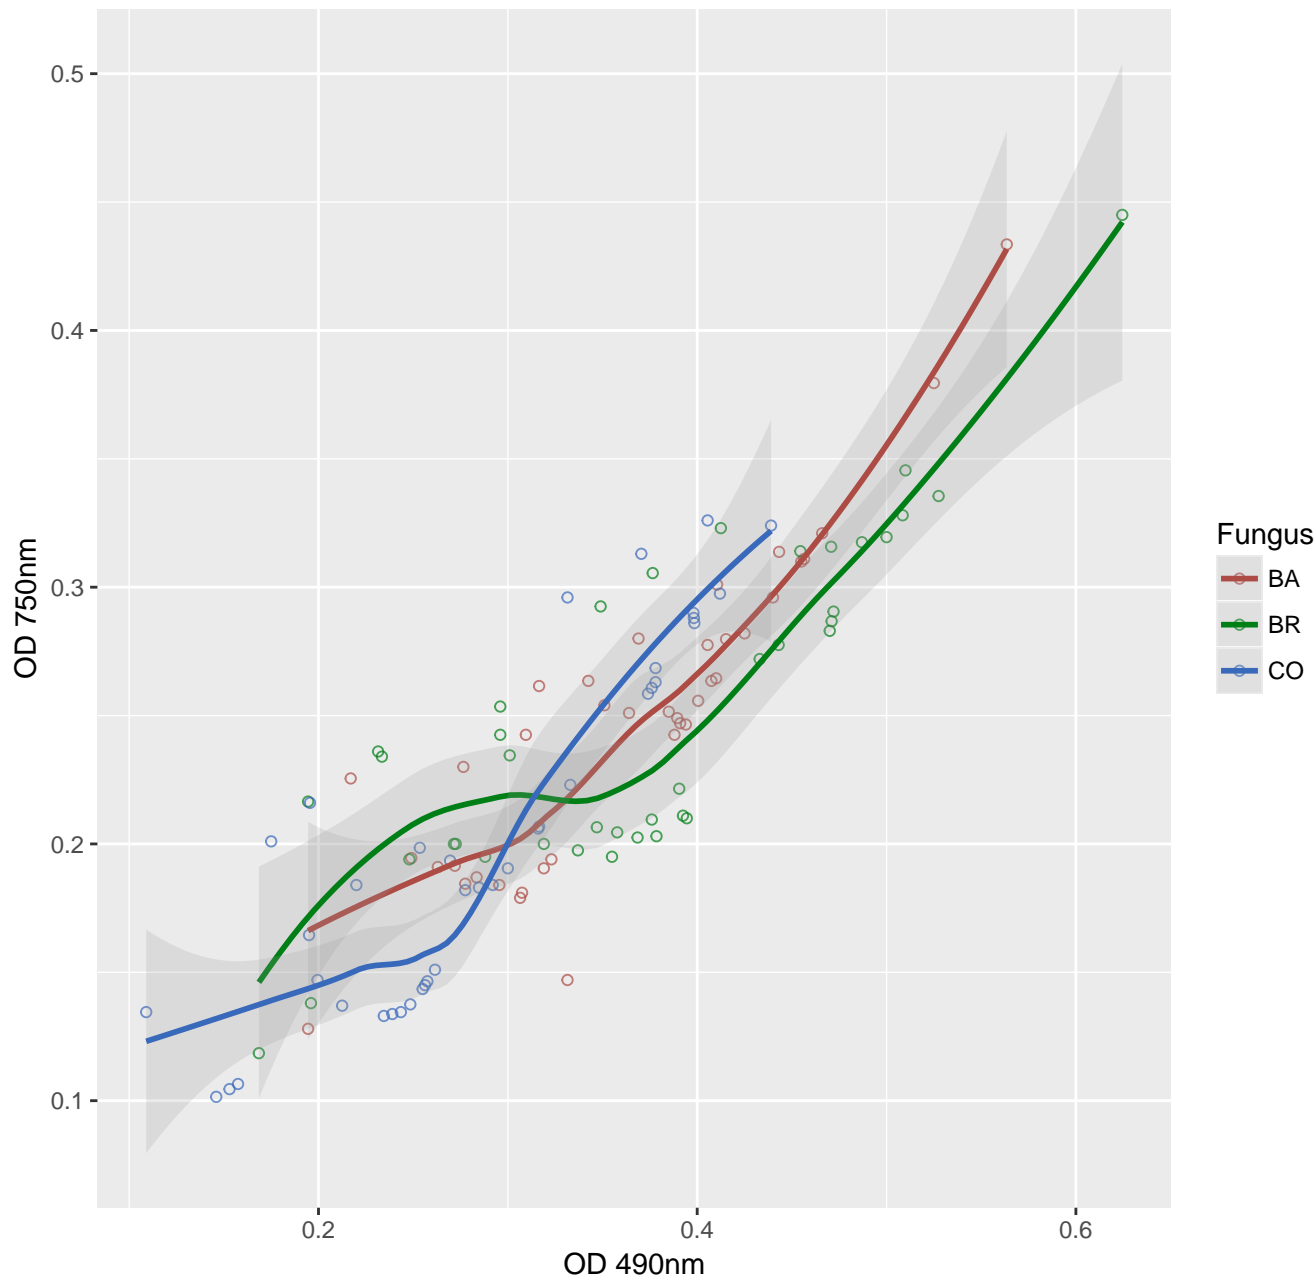

# D.Trehalose

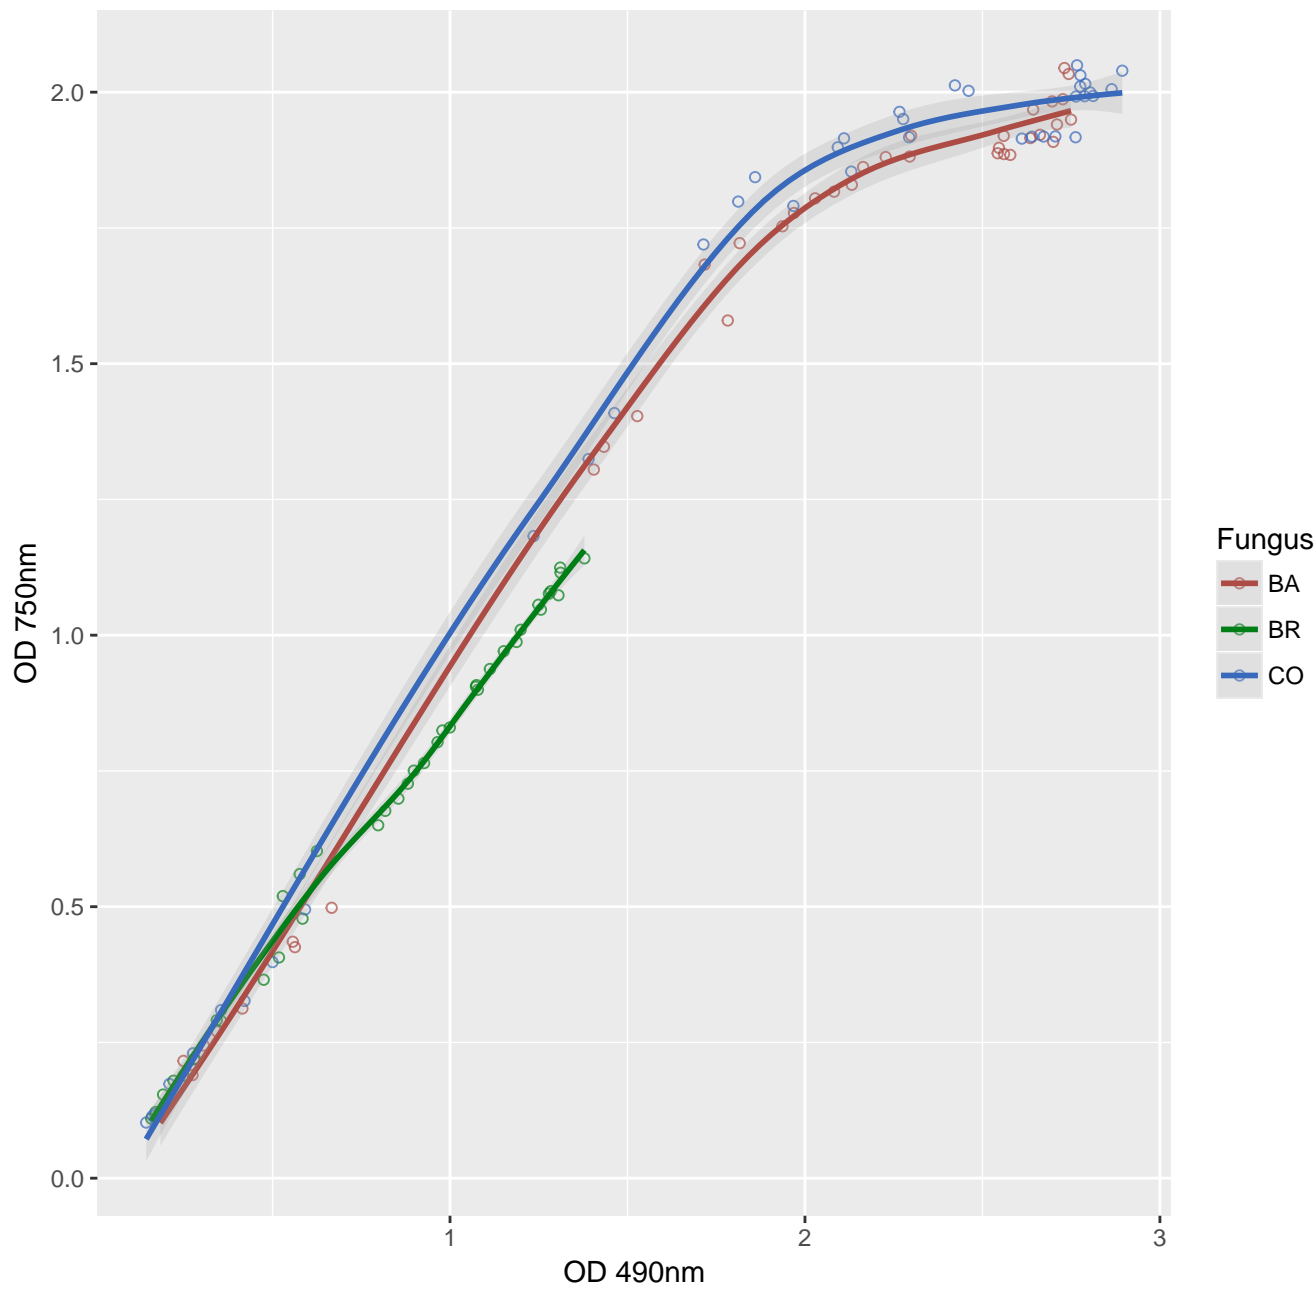

# D.Xylose

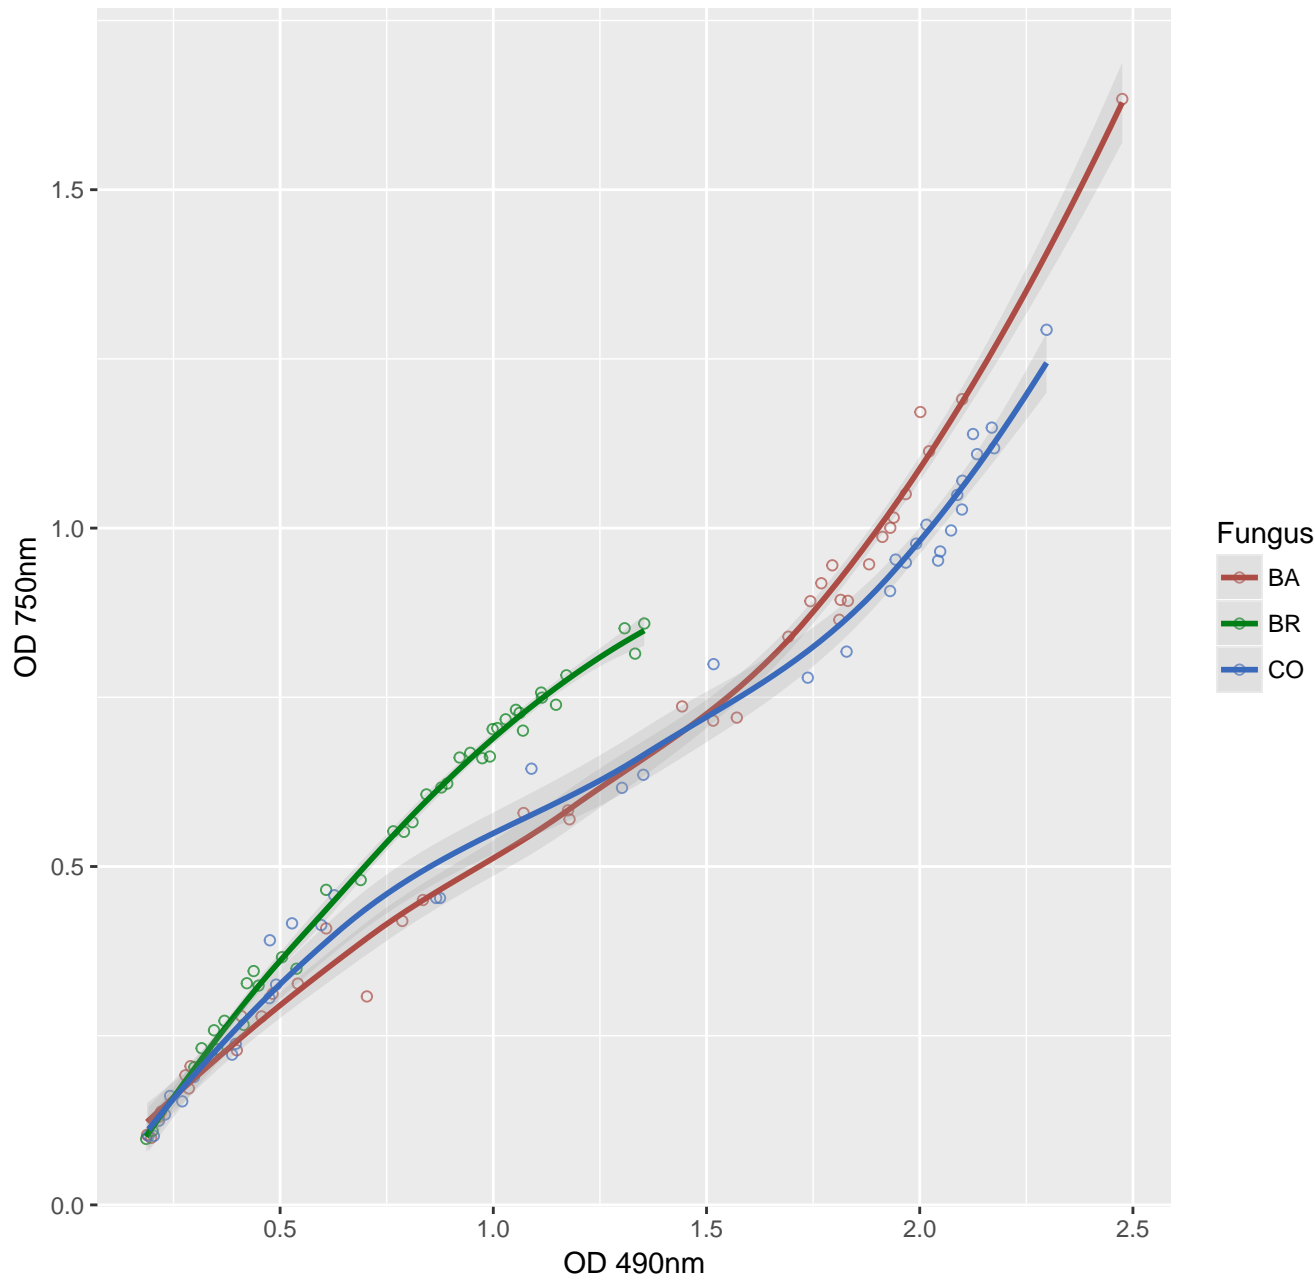

# FumaricAcid

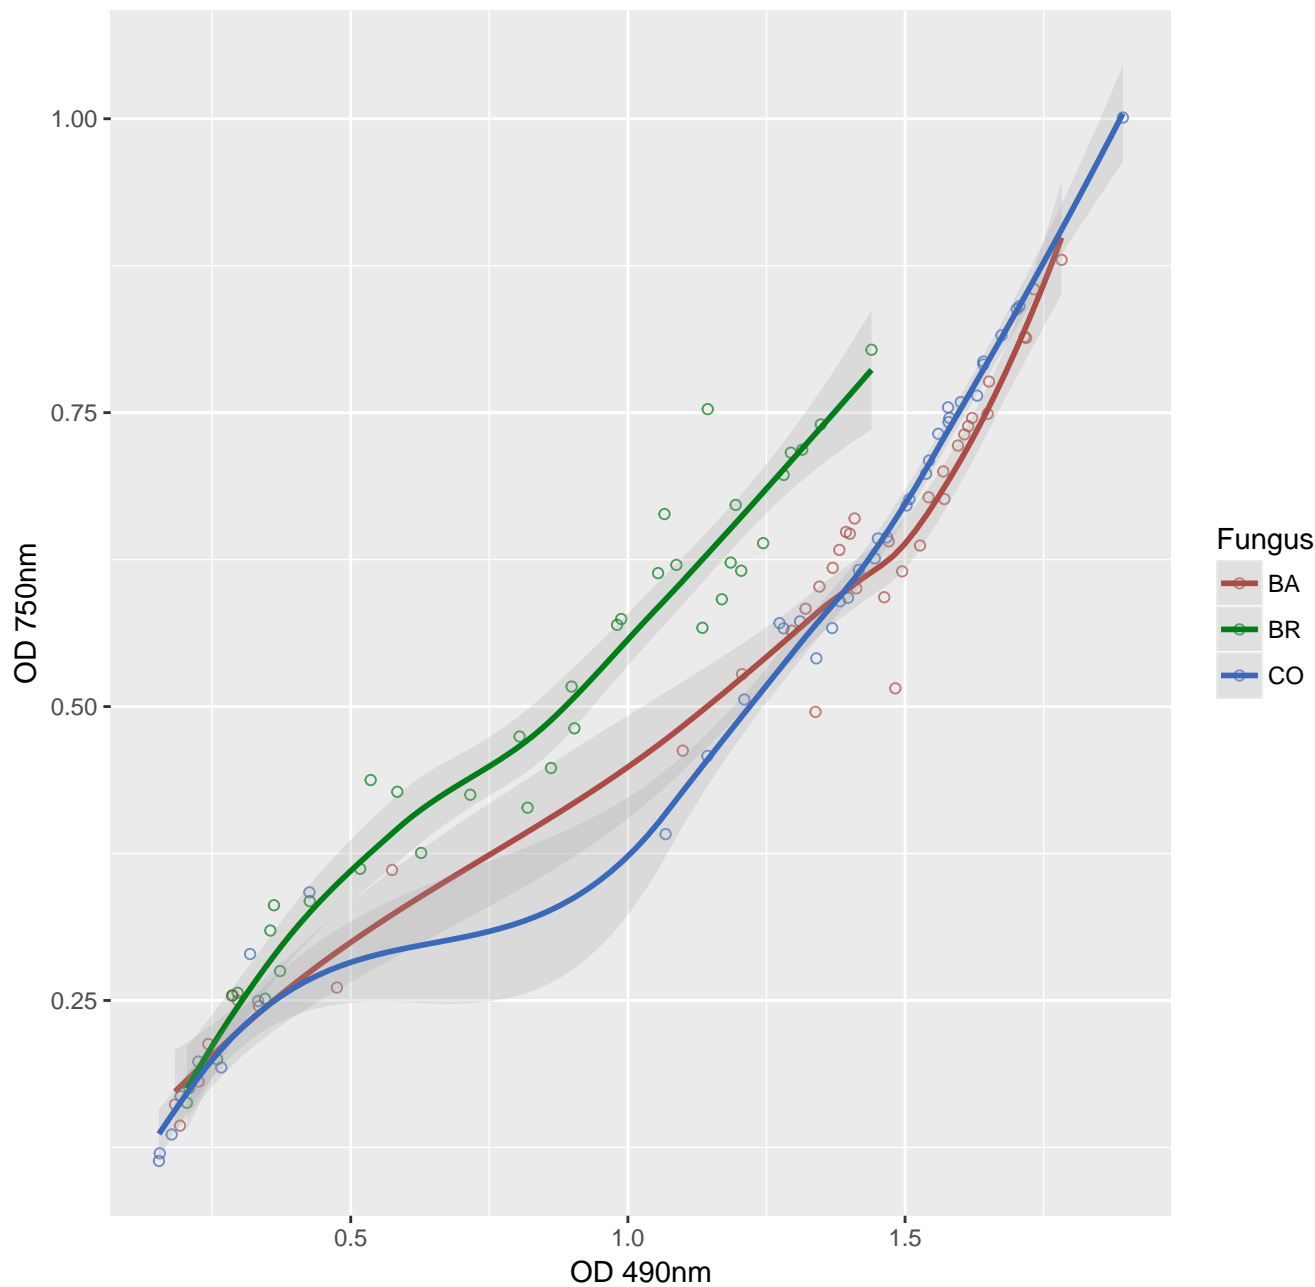

# G.Amino.butyricAcid

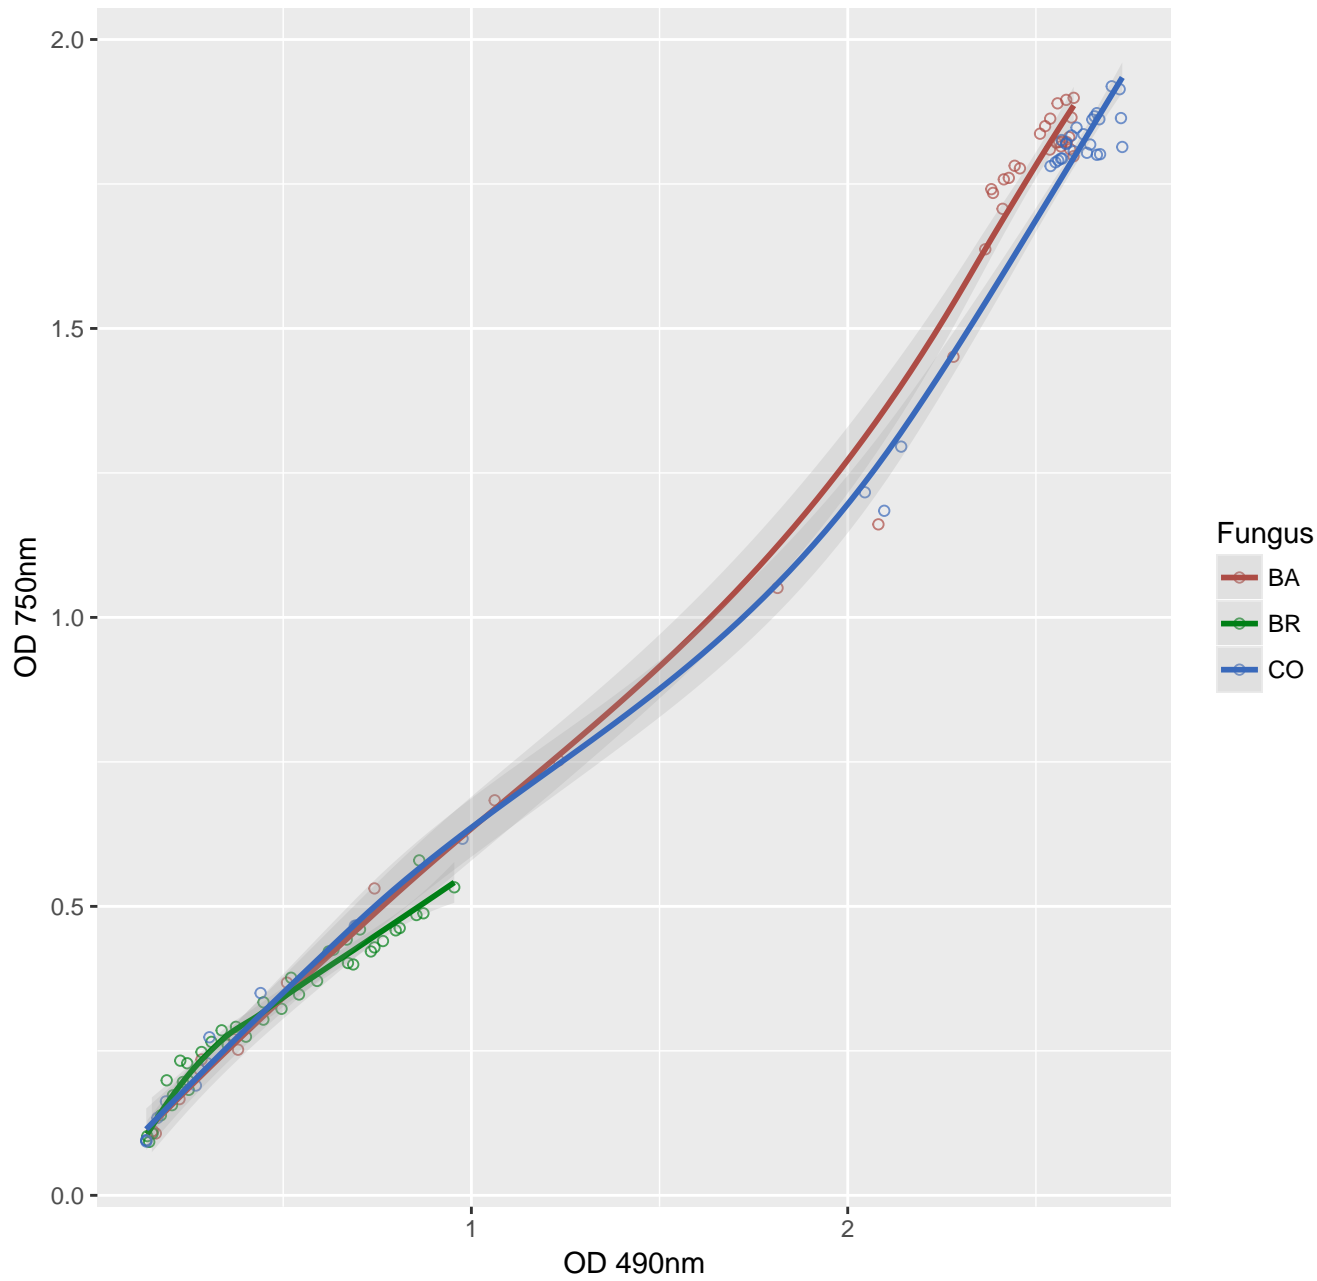



# Gentibiose

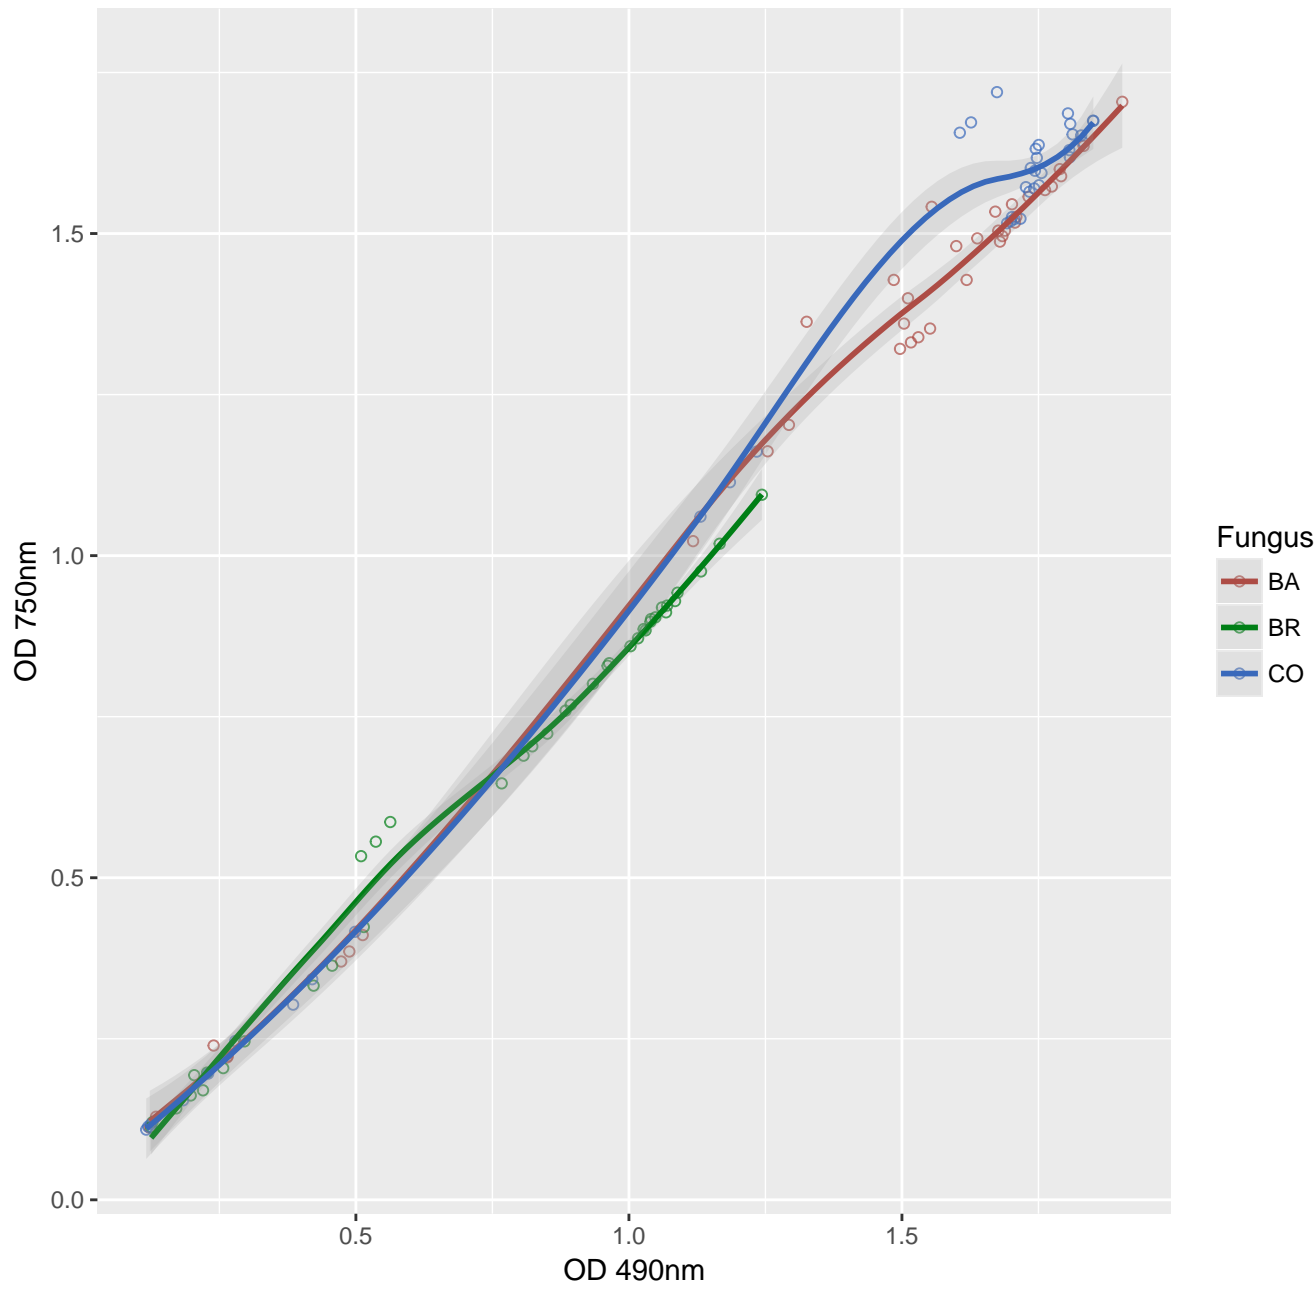

# G.Hydroxy.butyricAcid

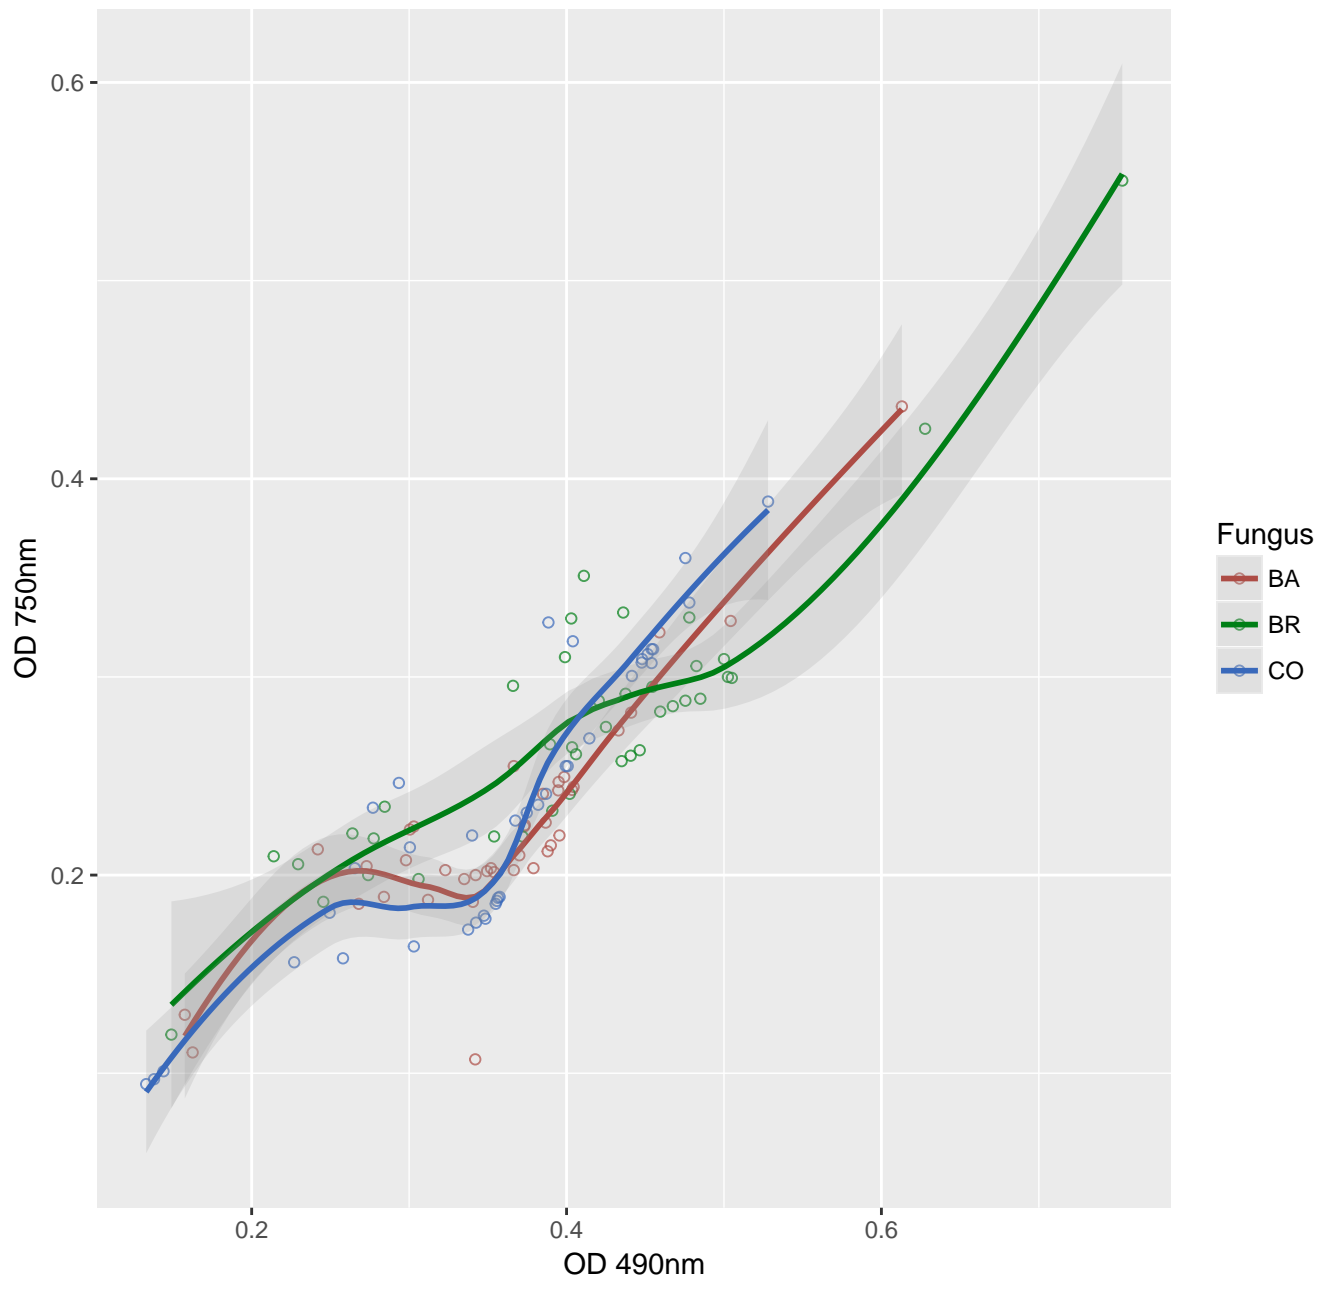

# Glucose.1.Phosphate

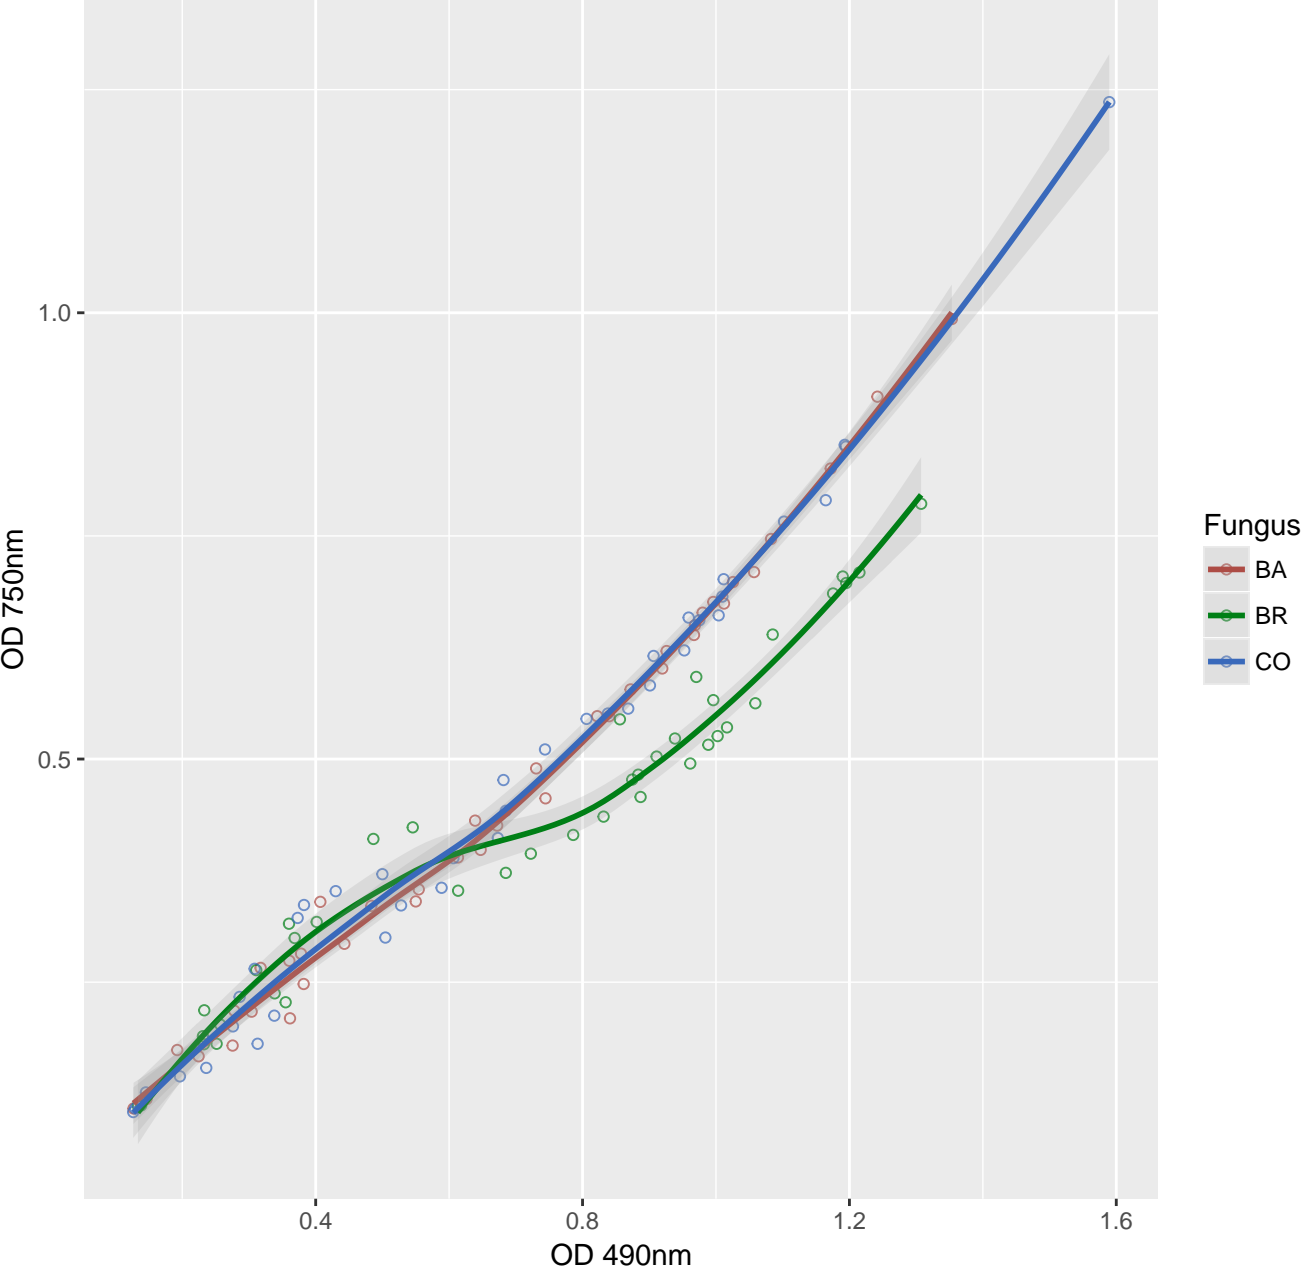

# Glucuronamide

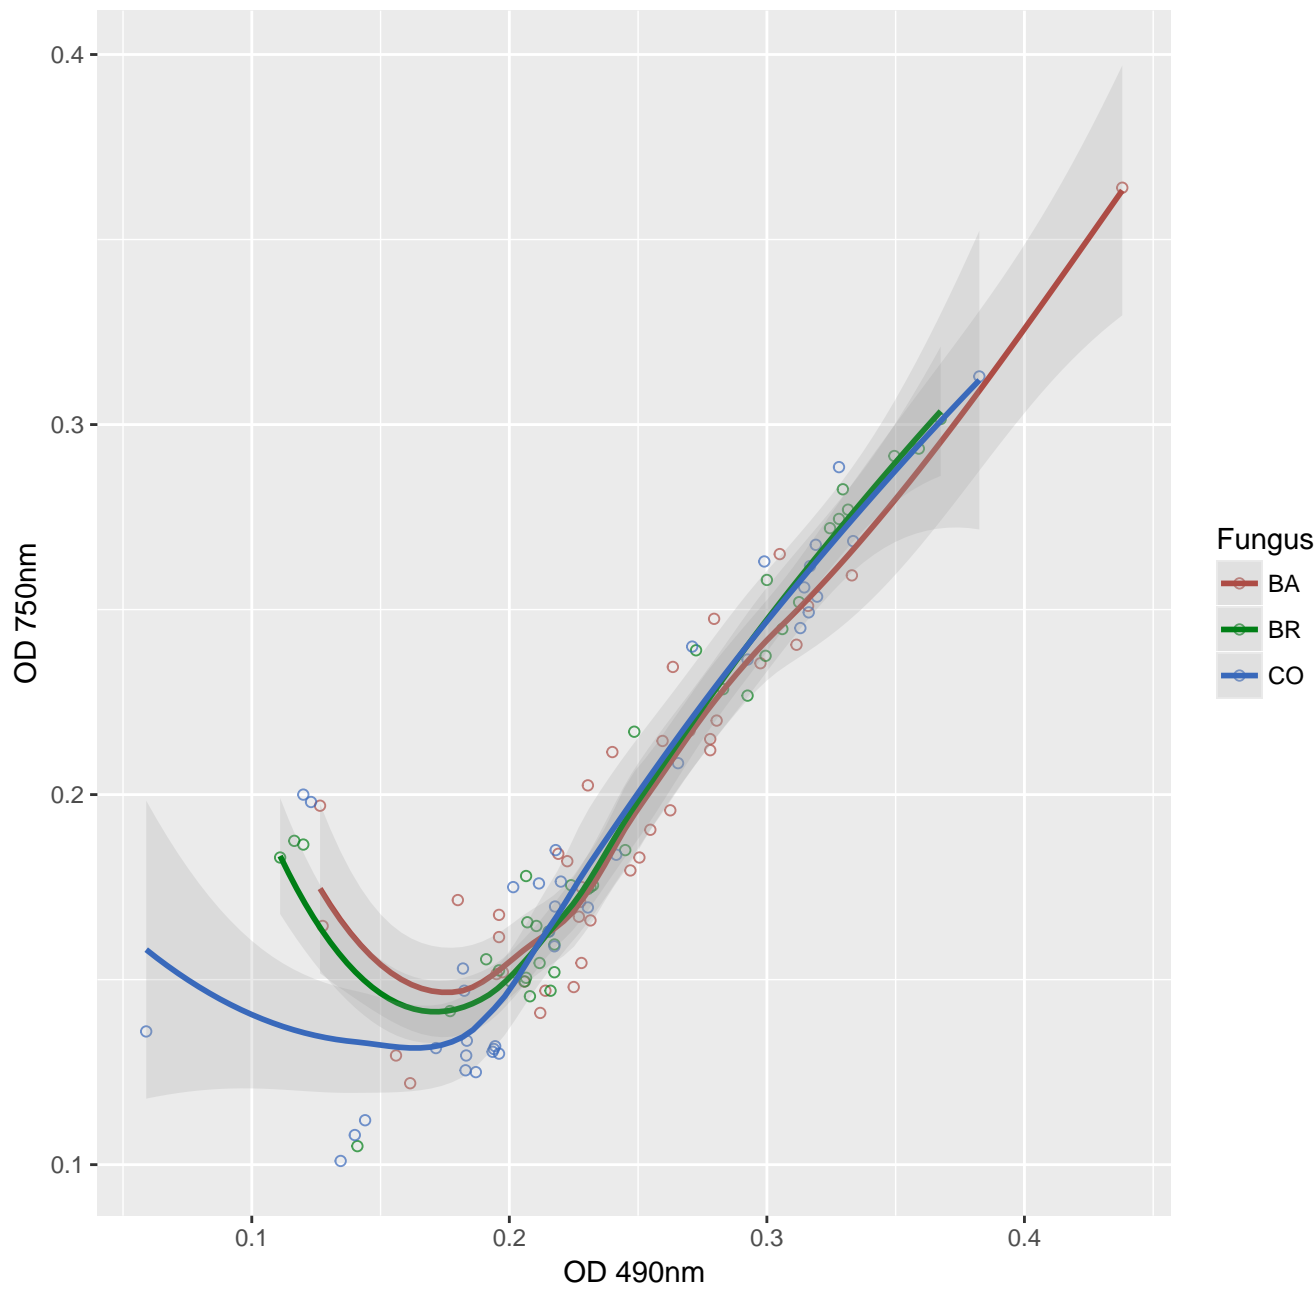

# Glycerol

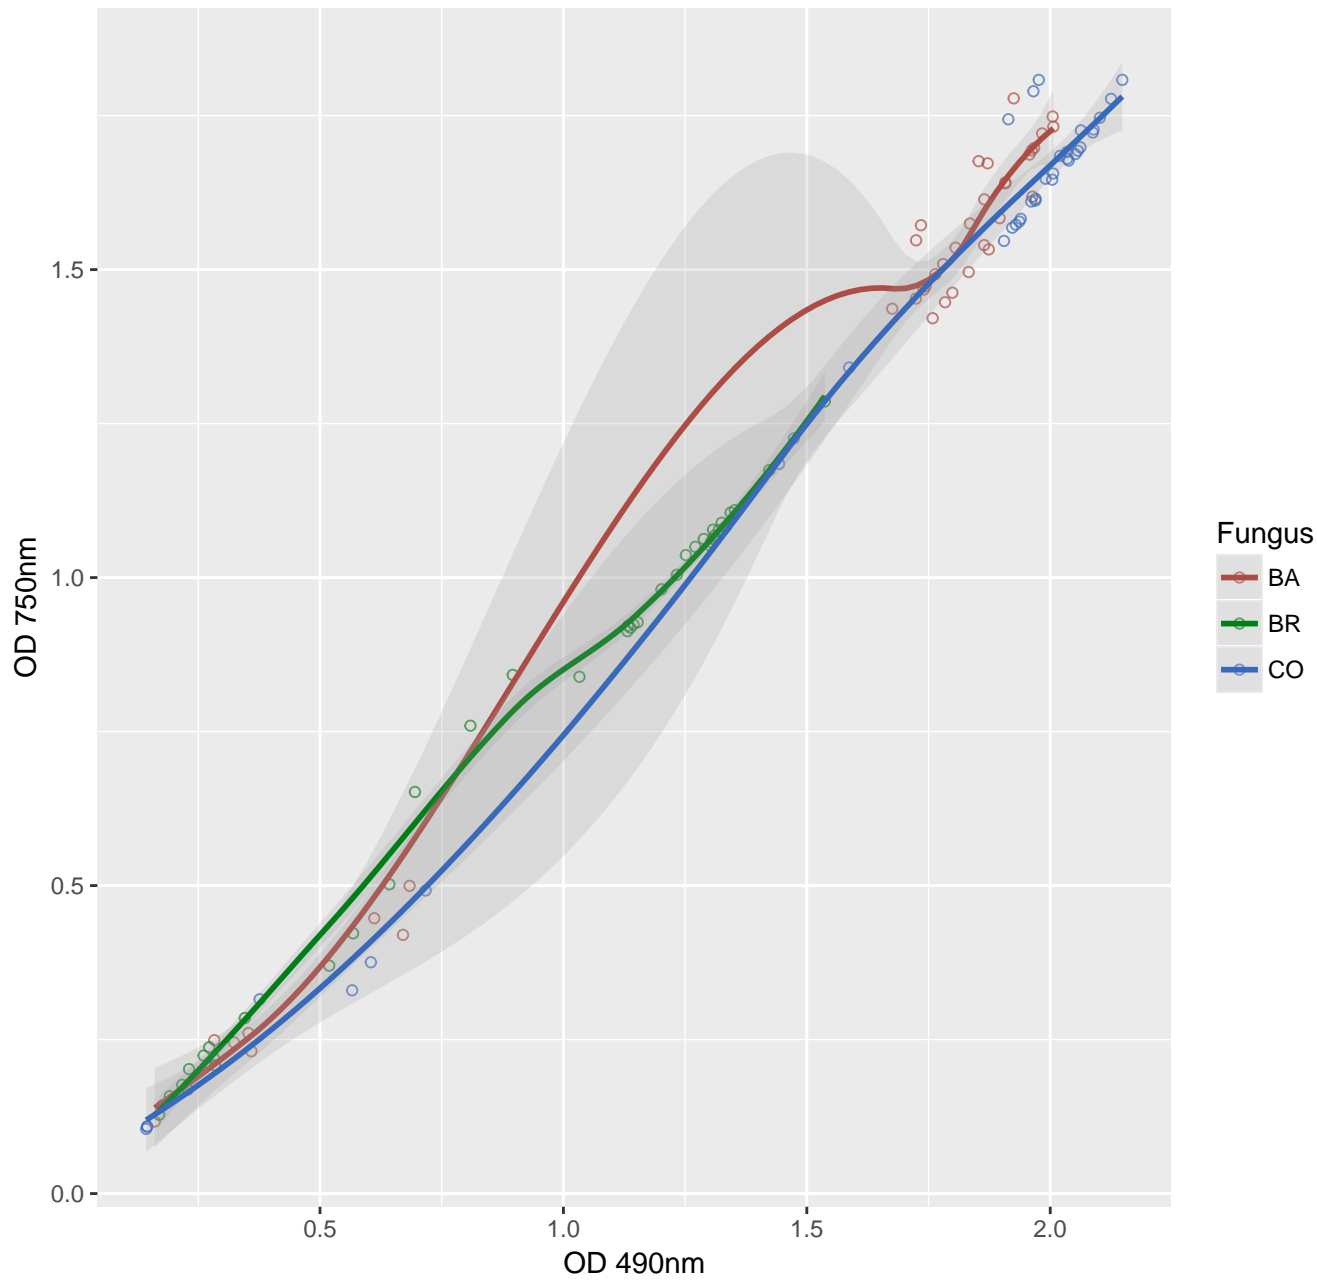

# Glycogen

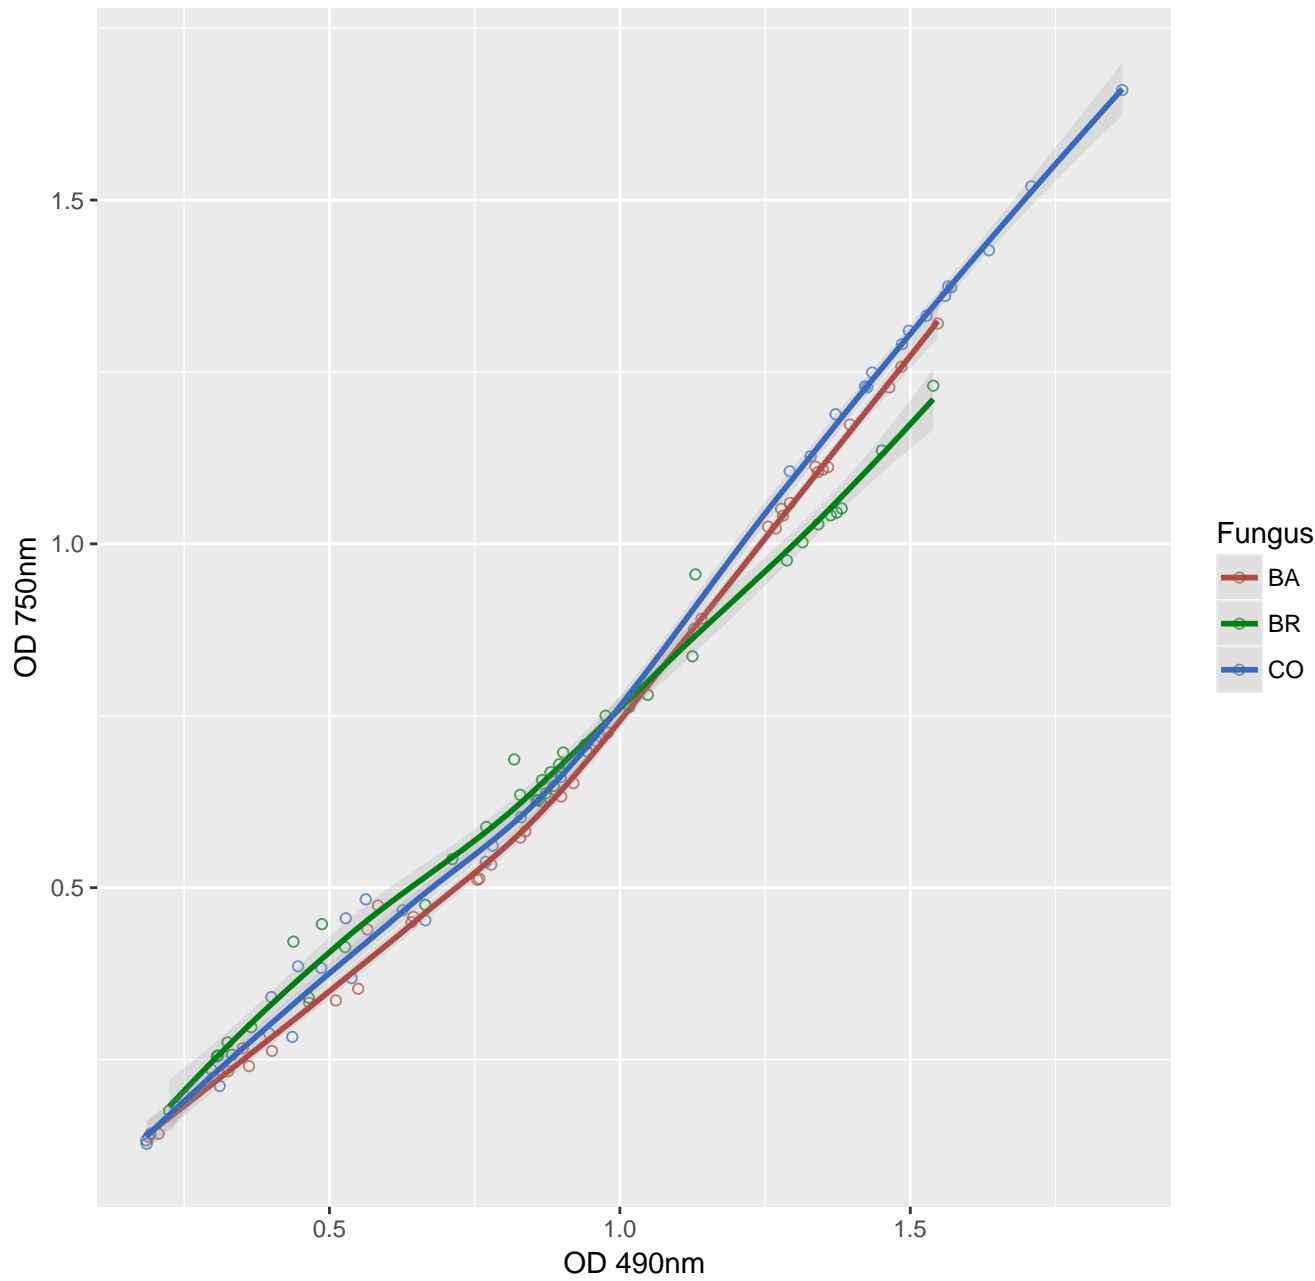

# Glycyl.L.GlutamicAcid

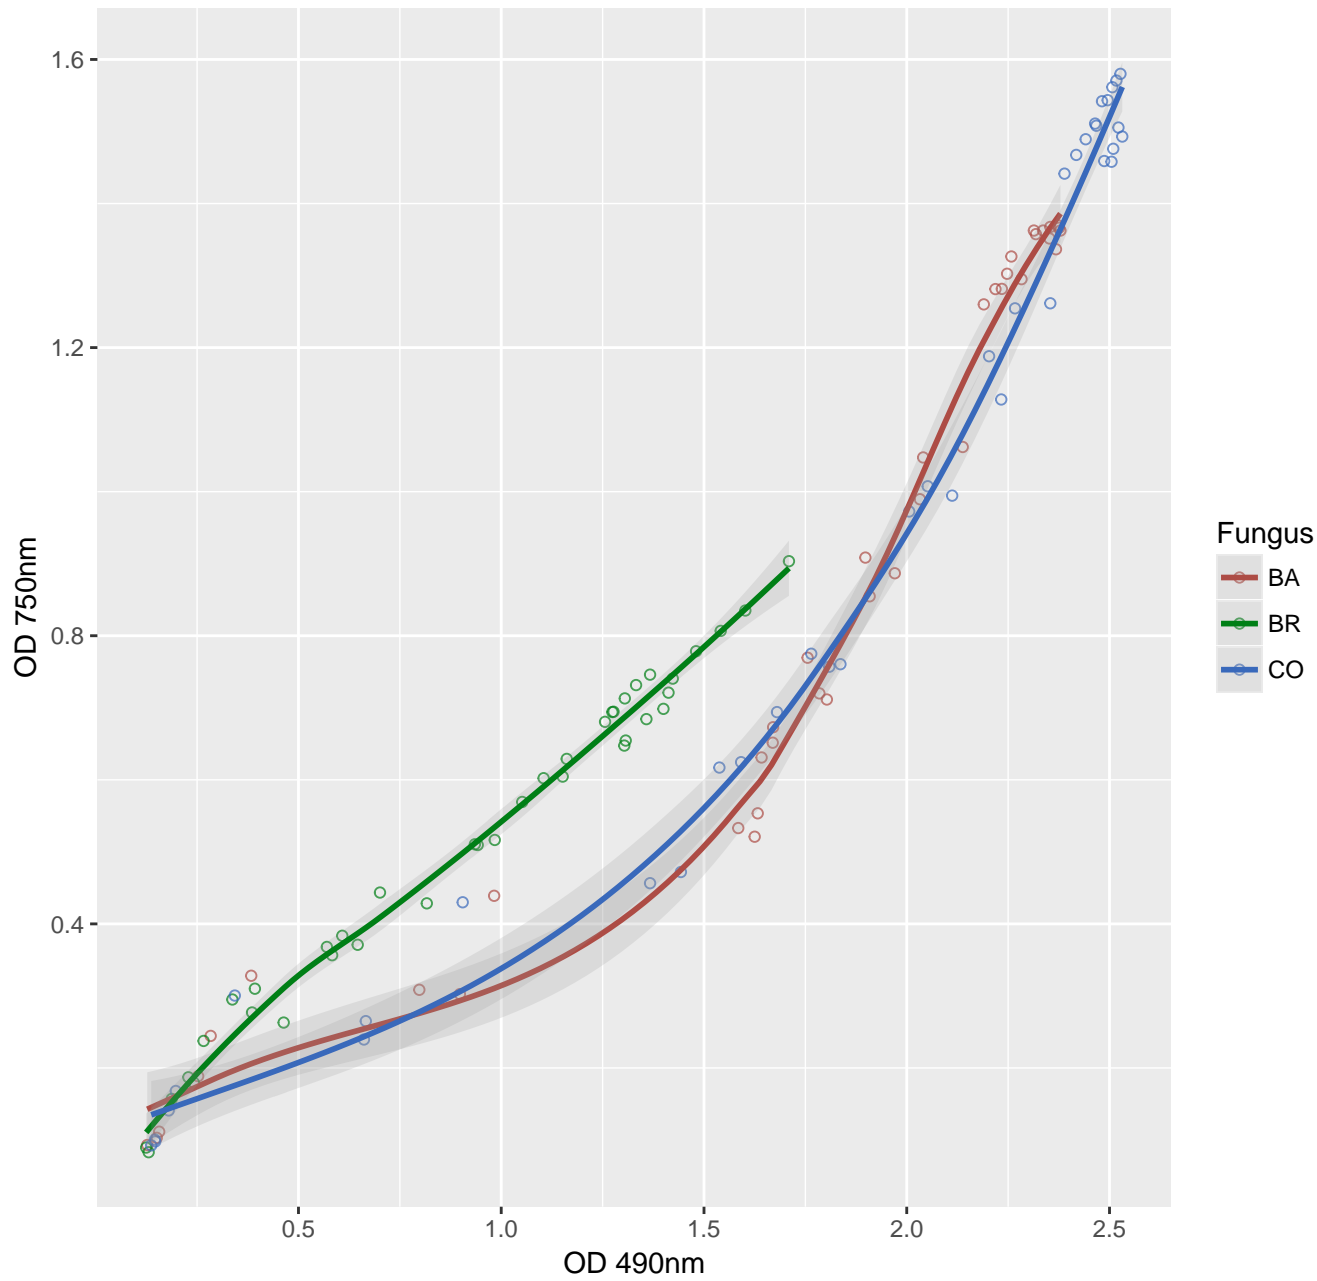

# I.Erythritol

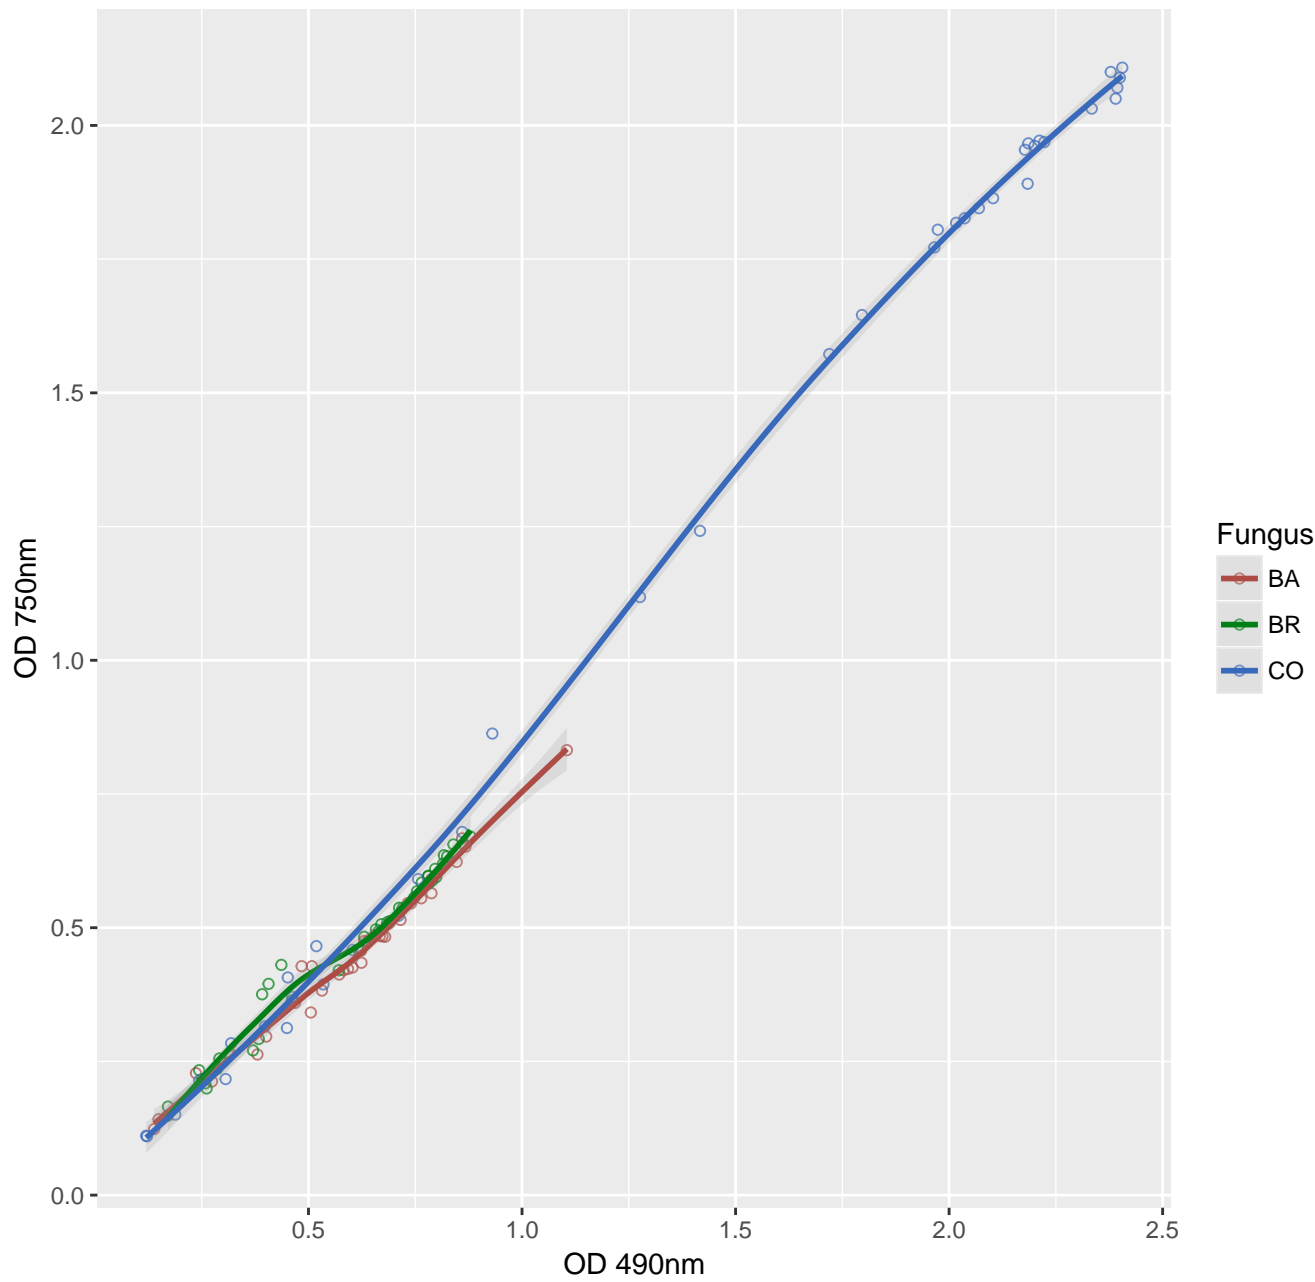



# Lactulose

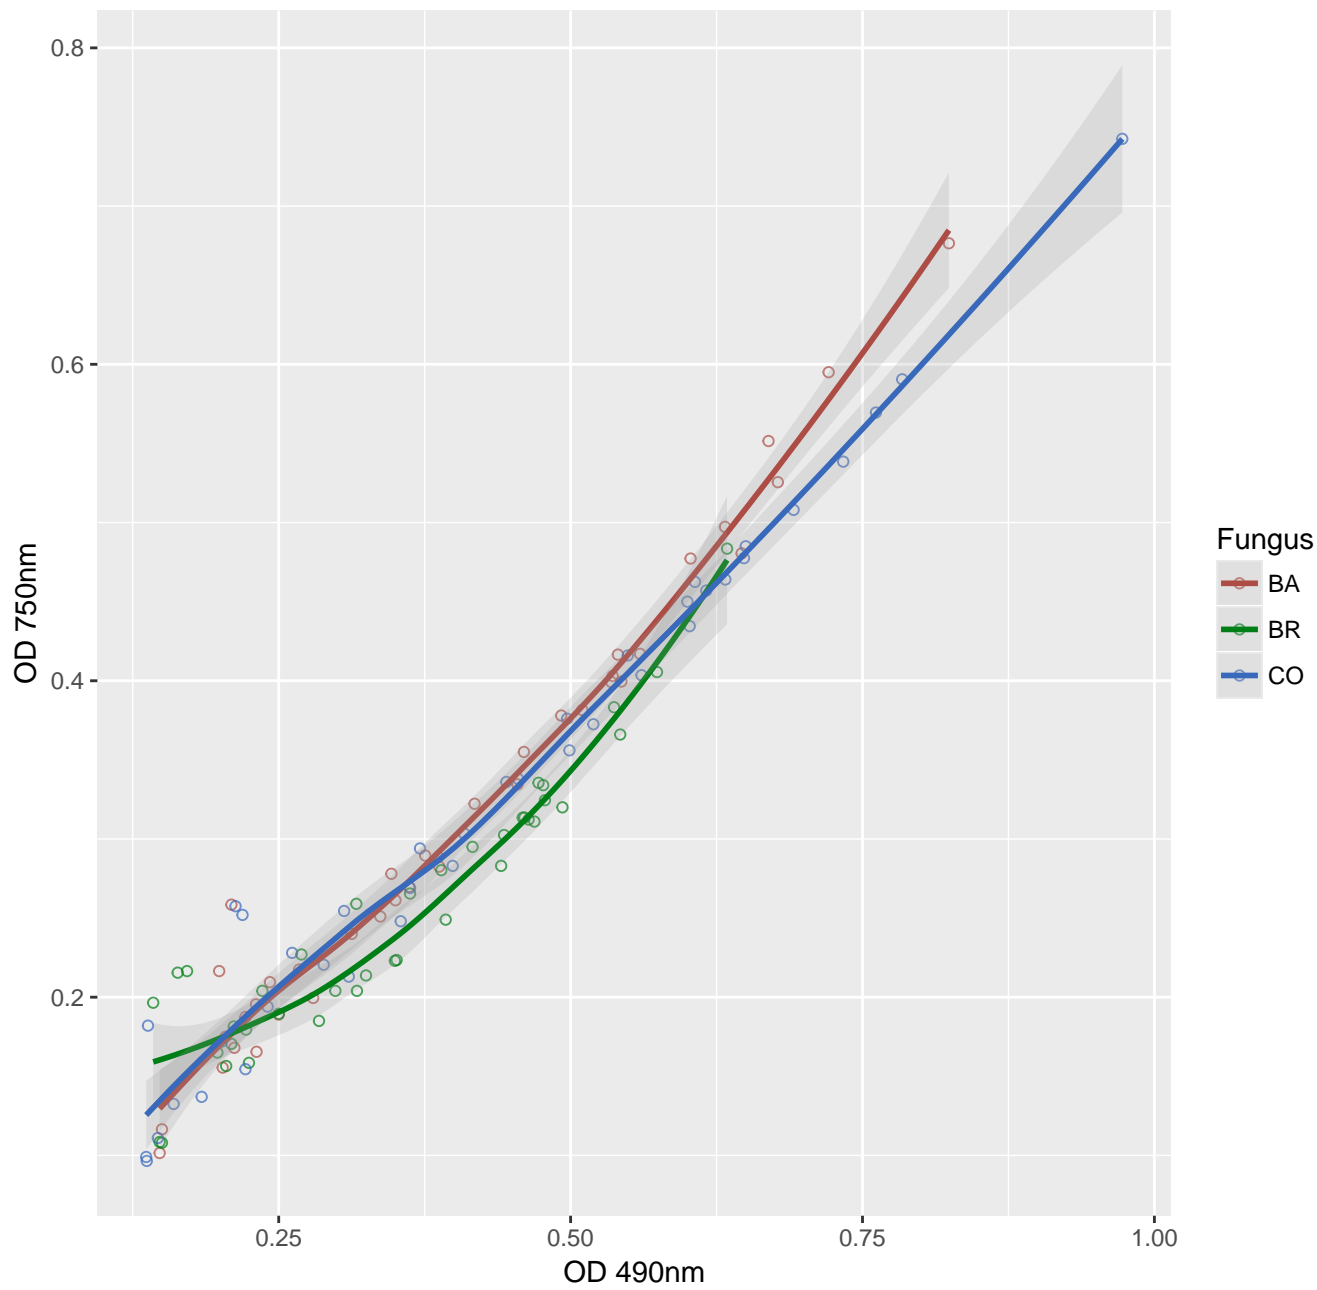

# L.Alanine

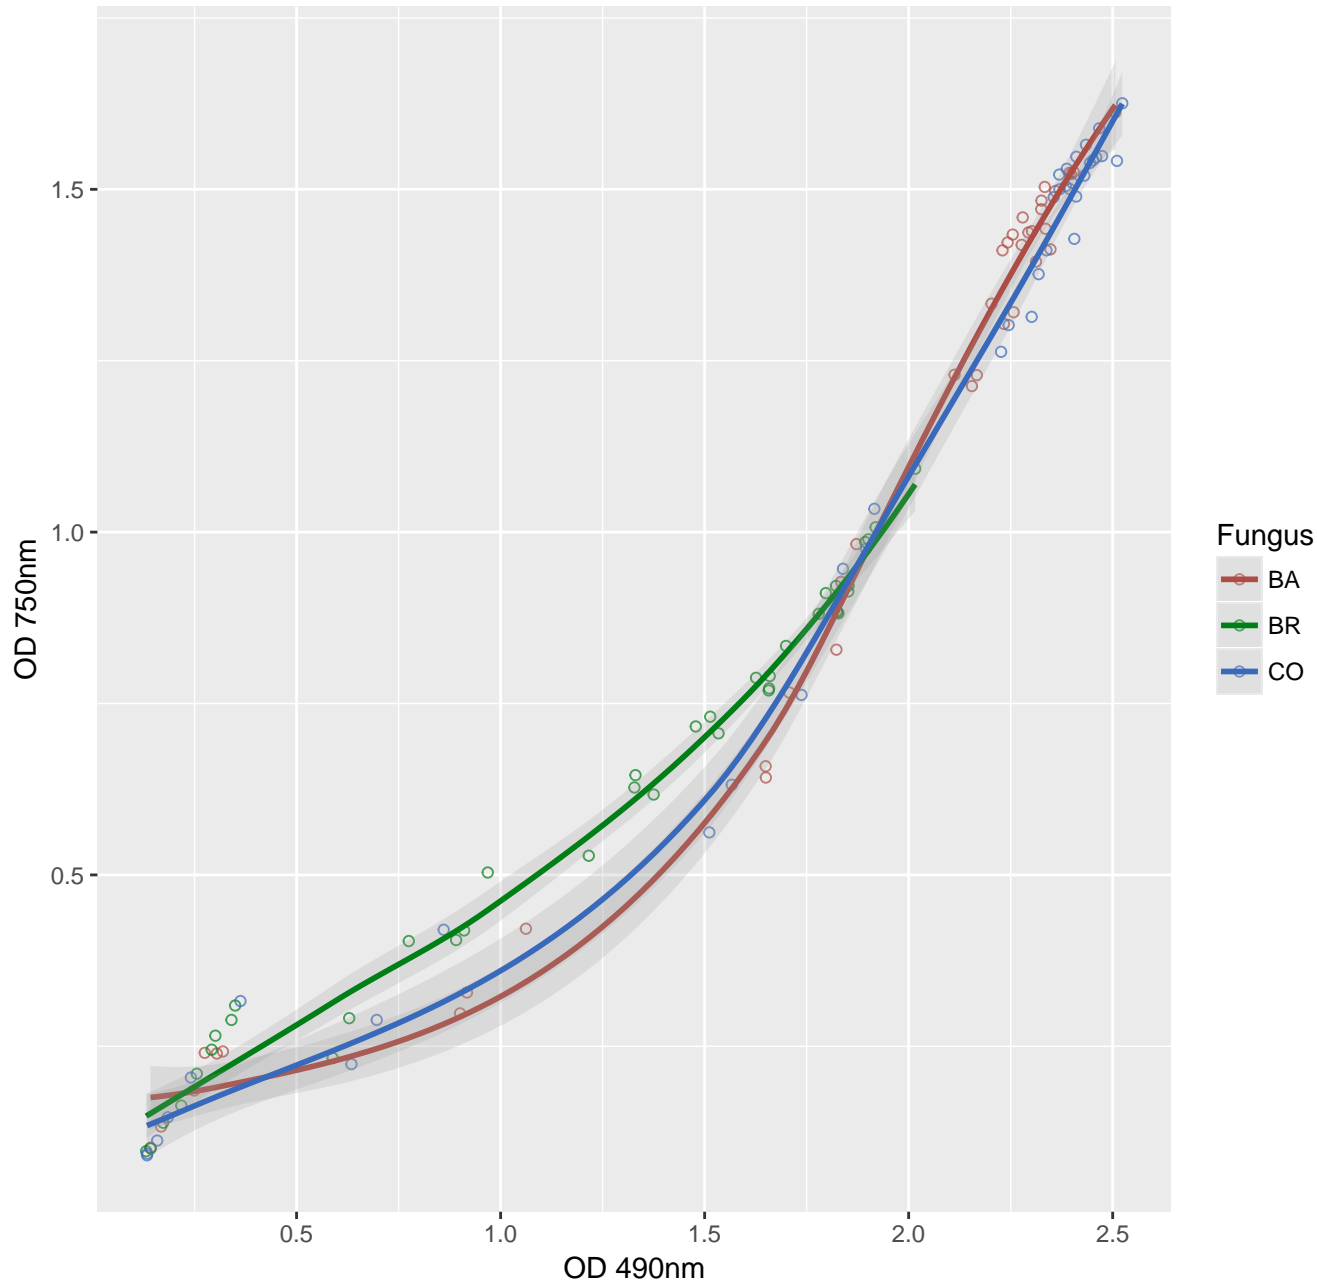

# L.Alanyl.Glycine

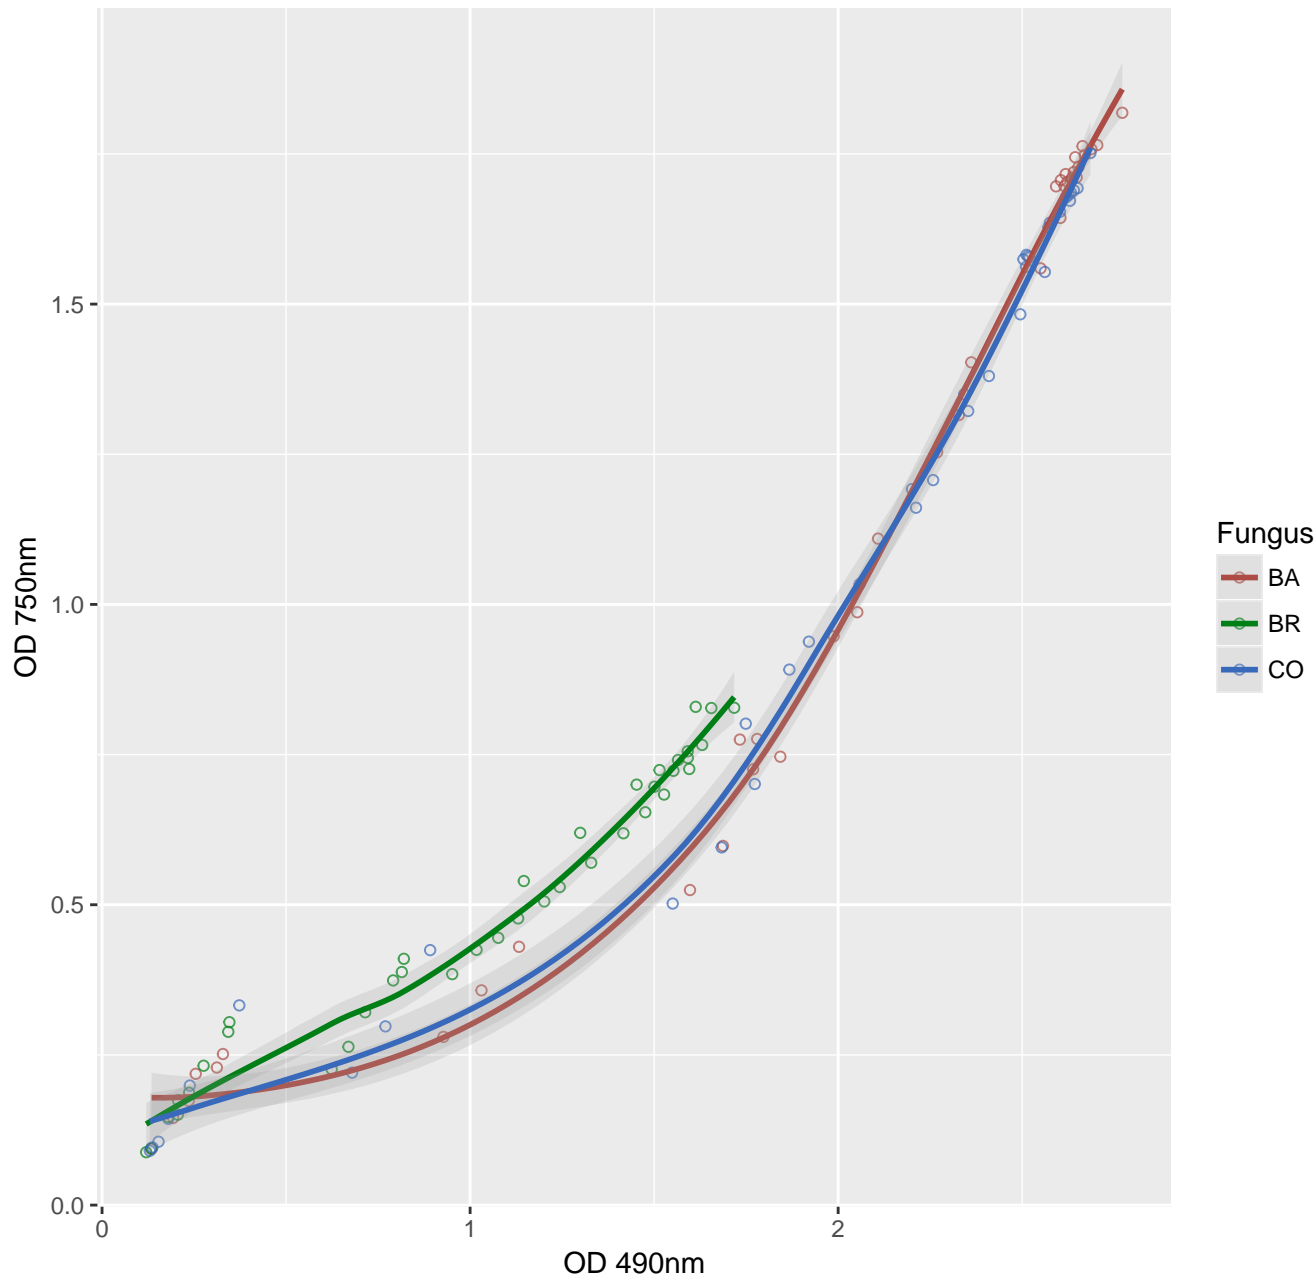

# L.Arabinose

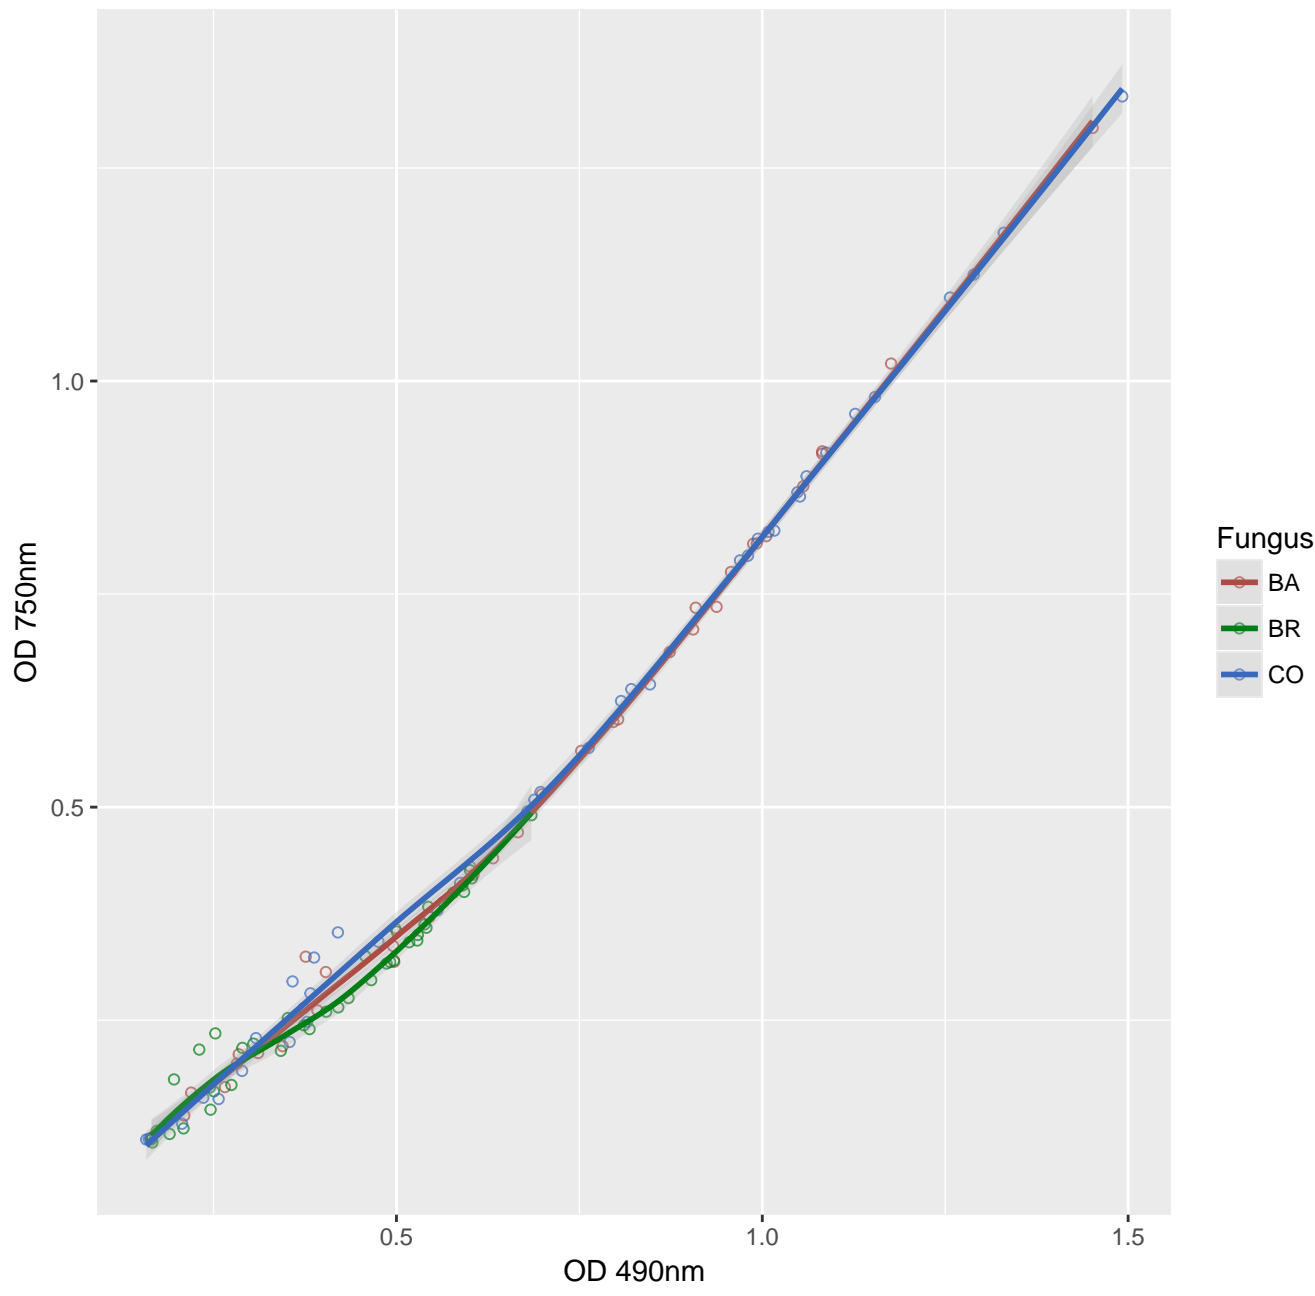

# L.Asparagine

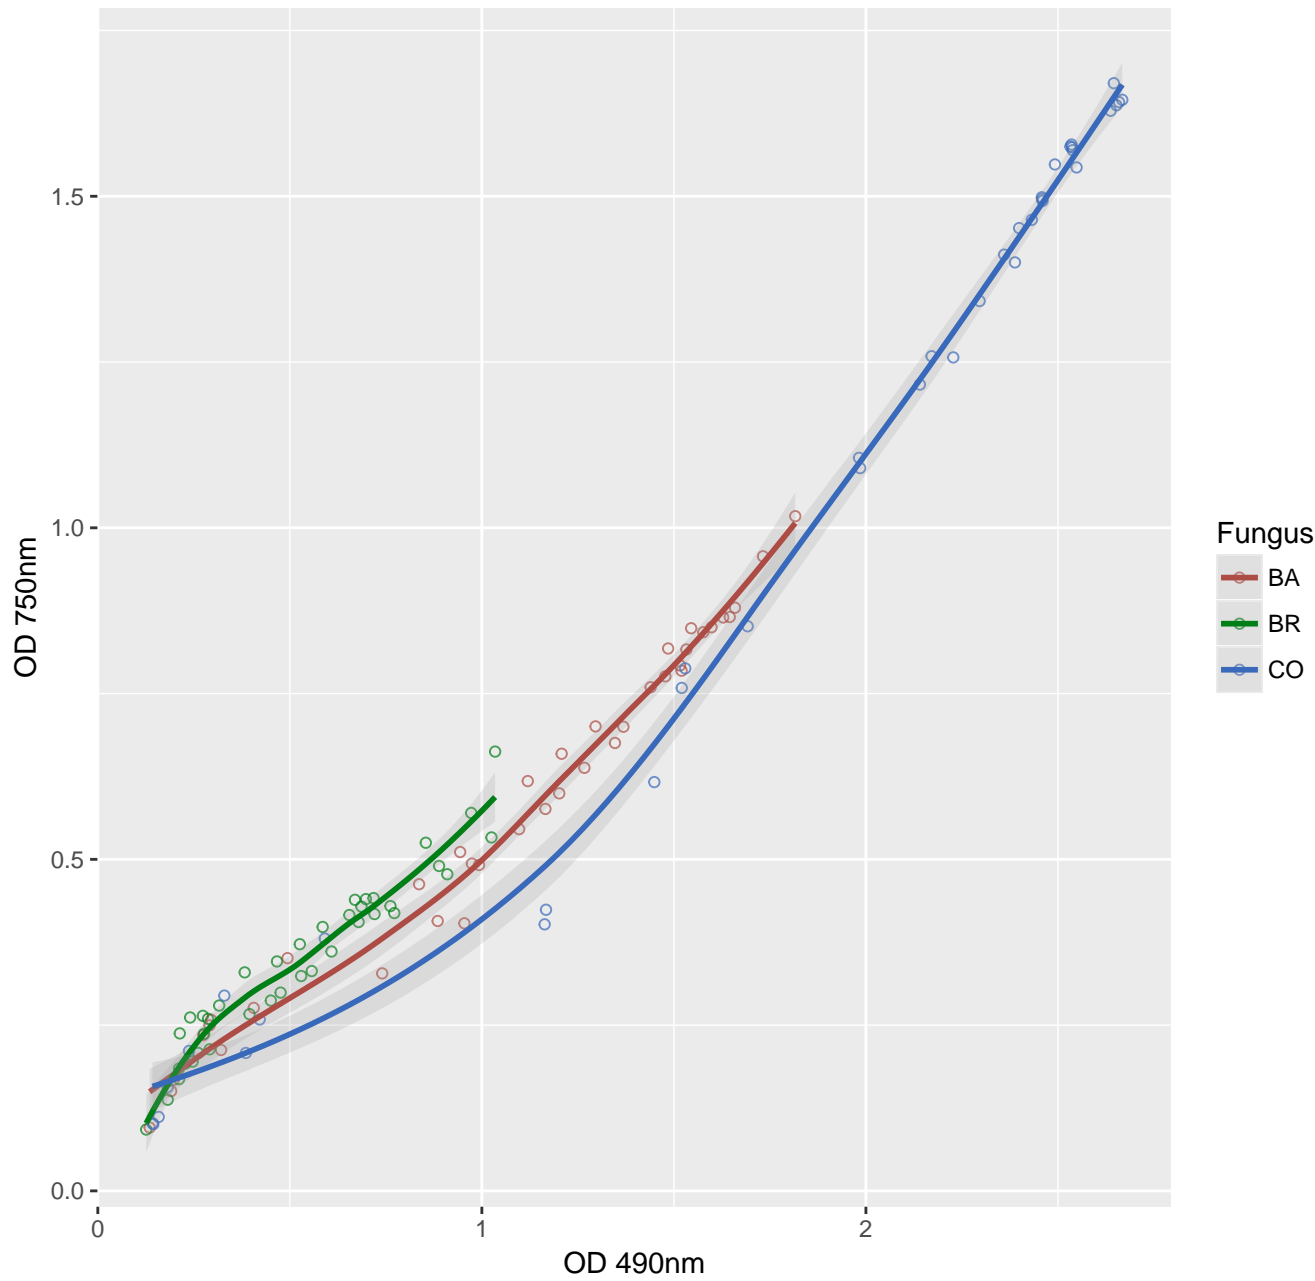

# L.AsparticAcid

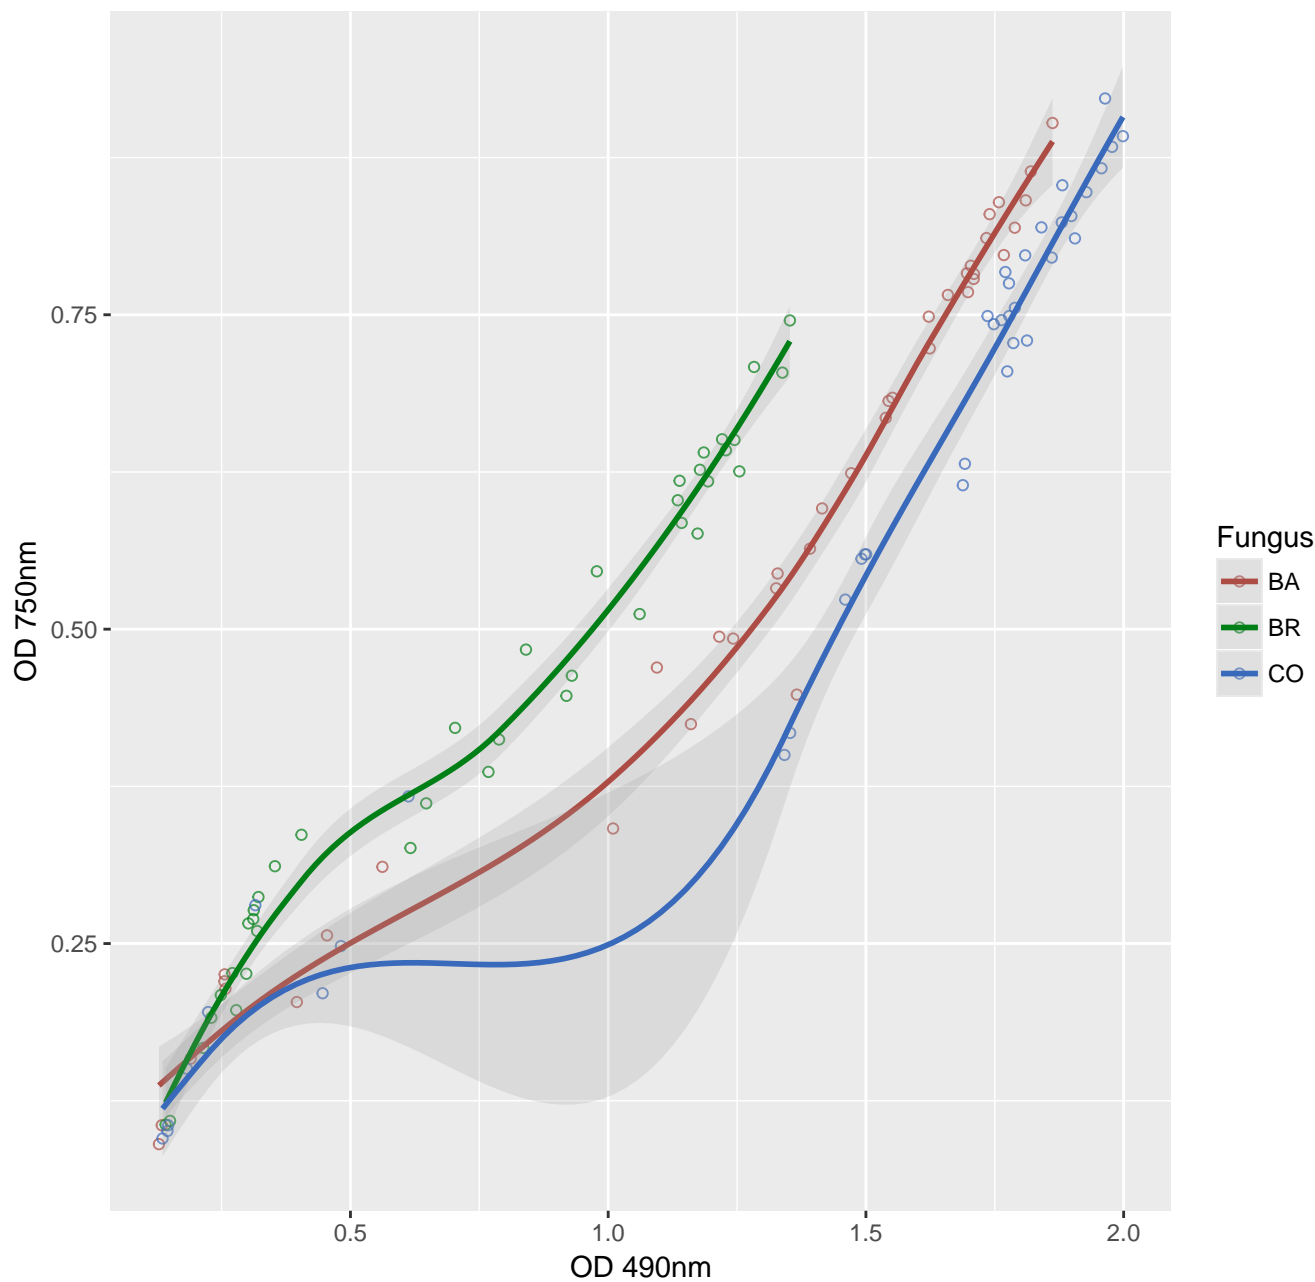

# L.Fucose

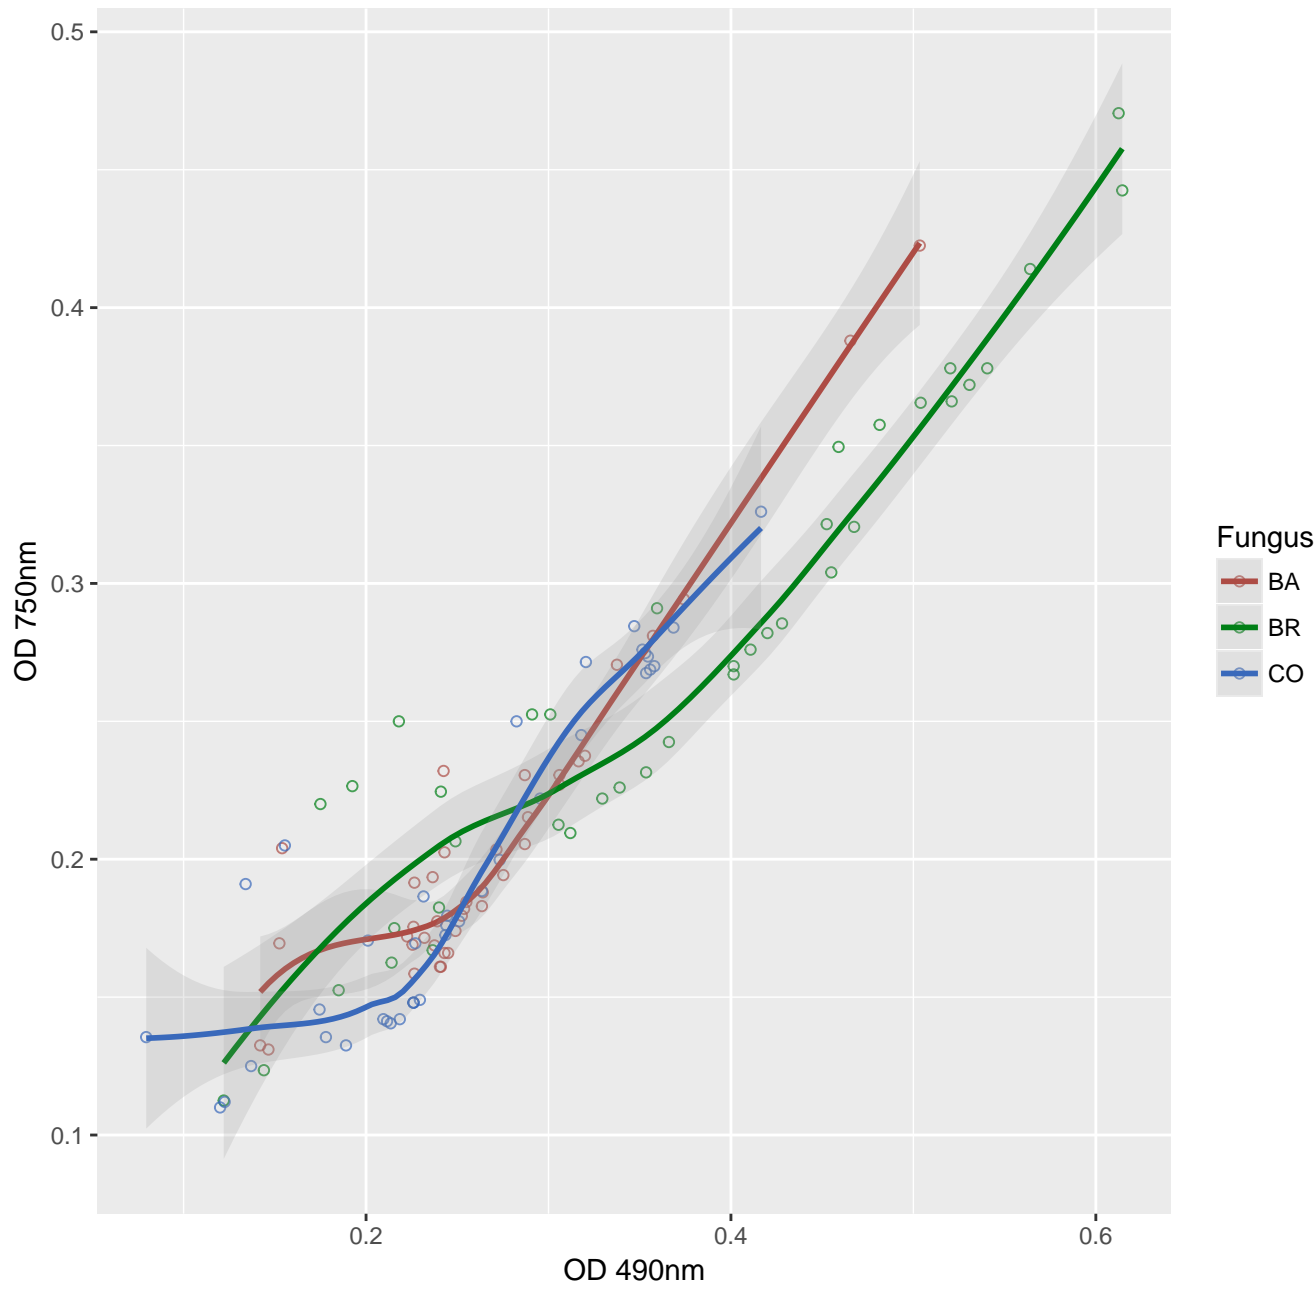

# L.GlutamicAcid

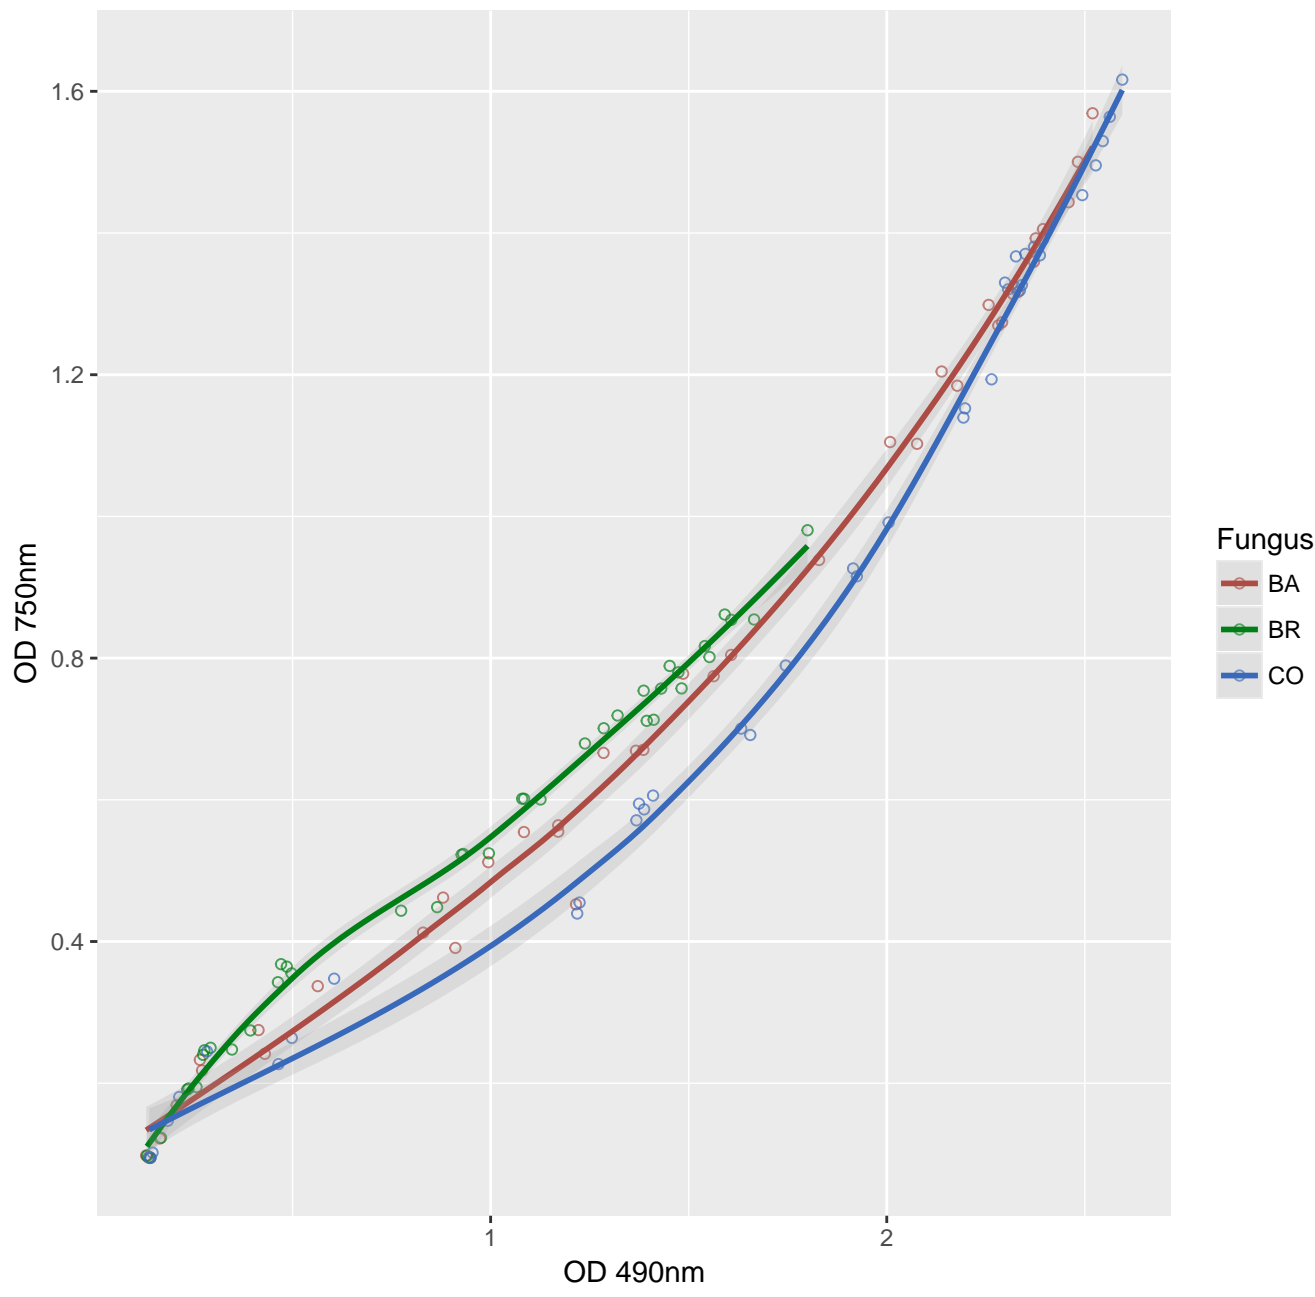



# L.LacticAcid

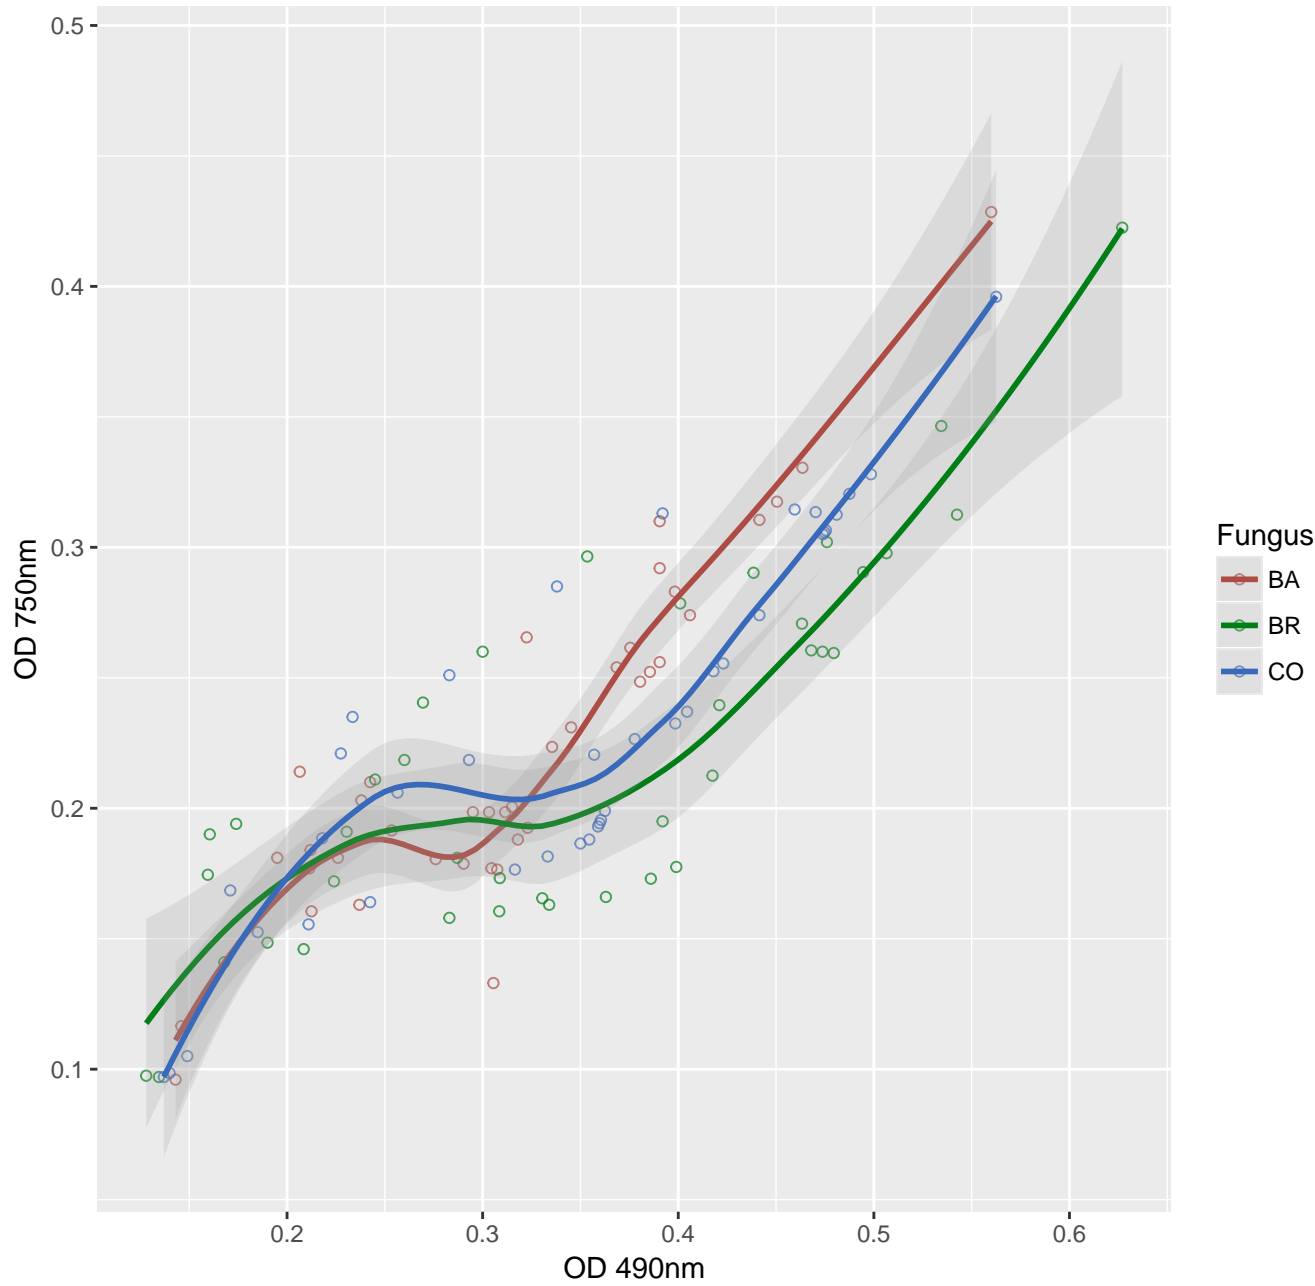

# L.MalicAcid

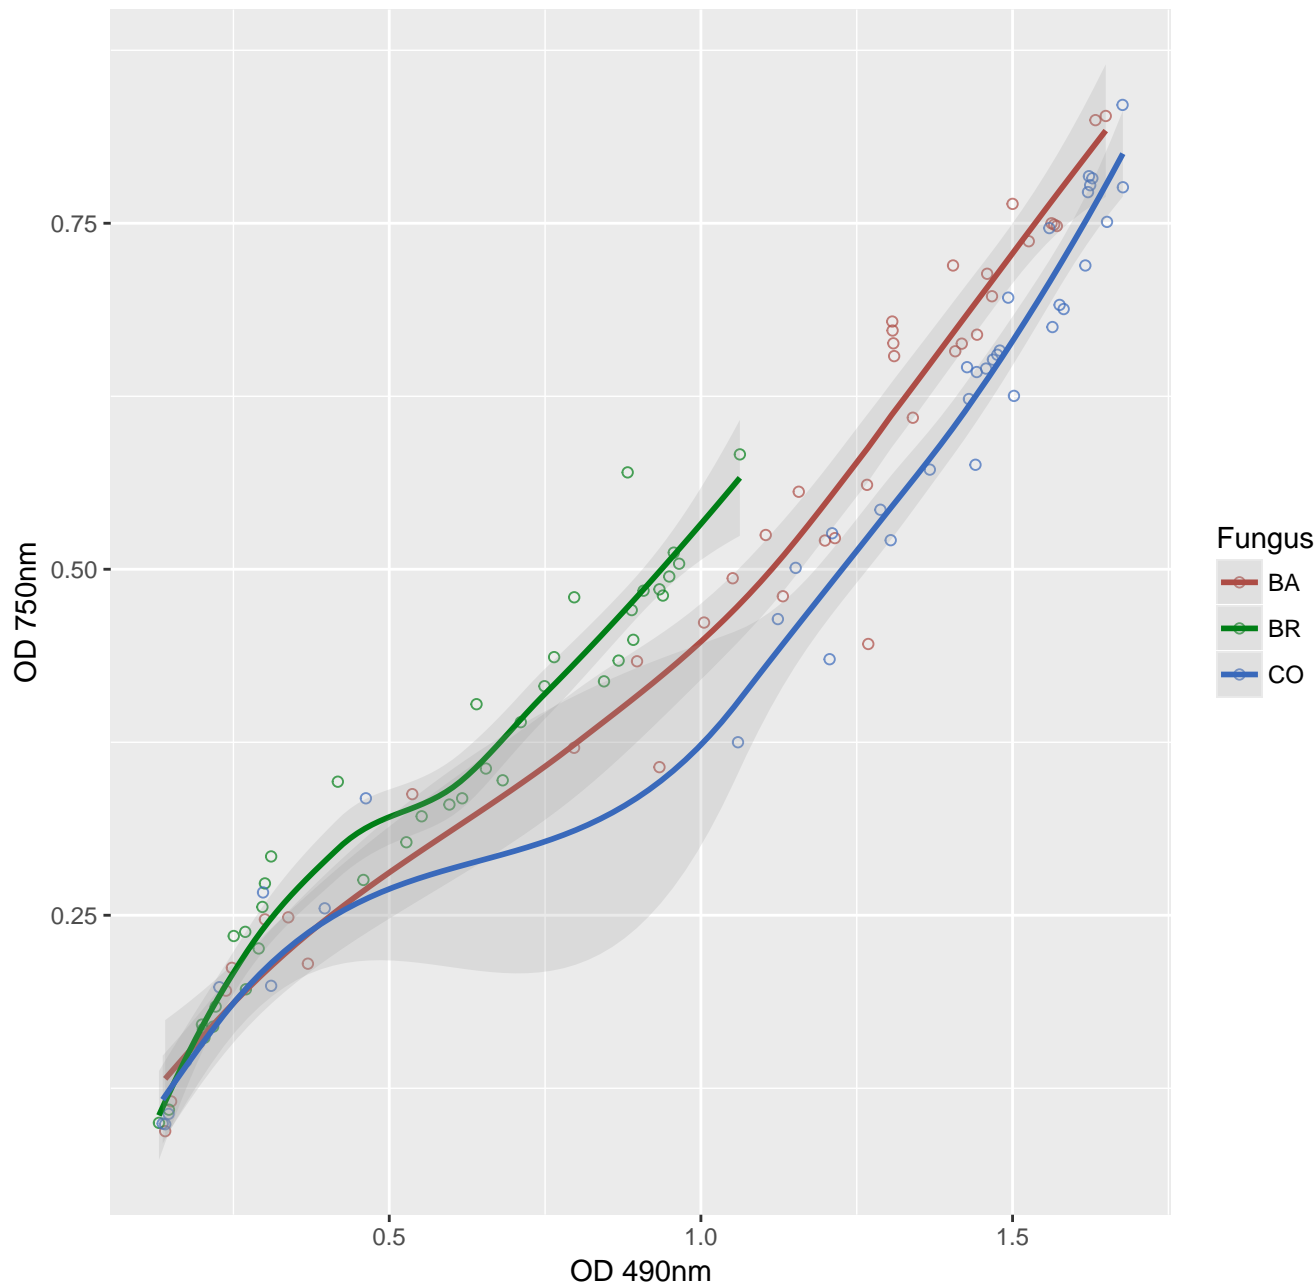

# L.Ornithine

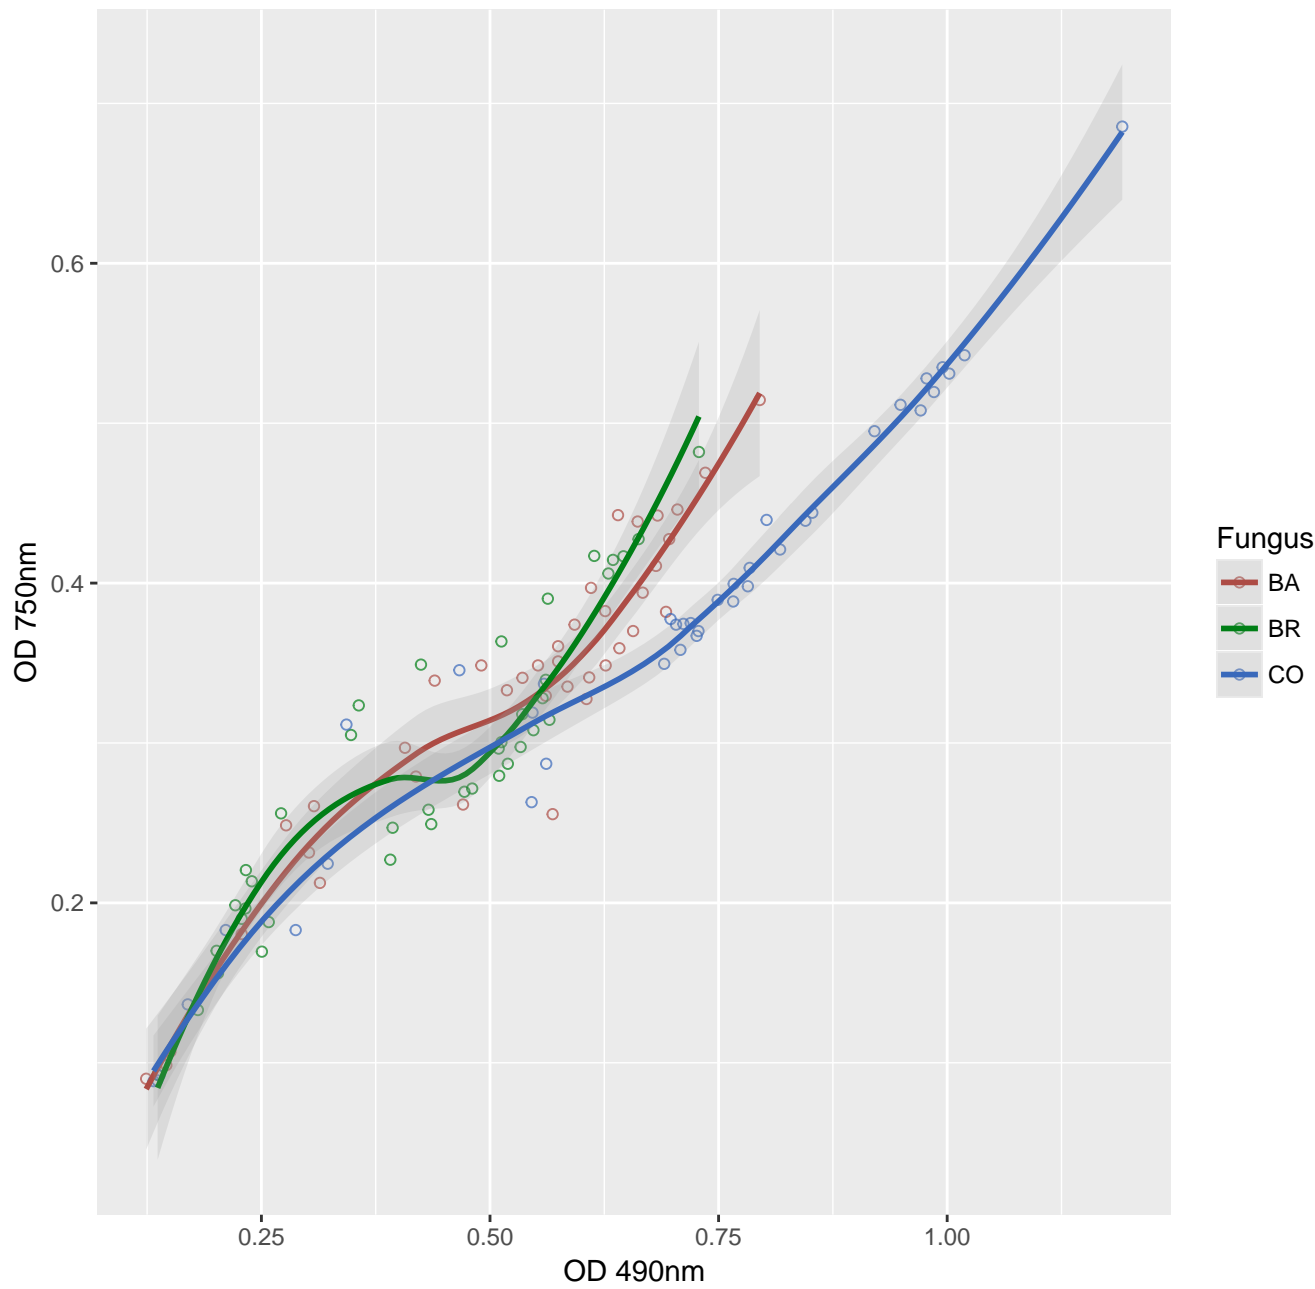

# L-Phenylalanine

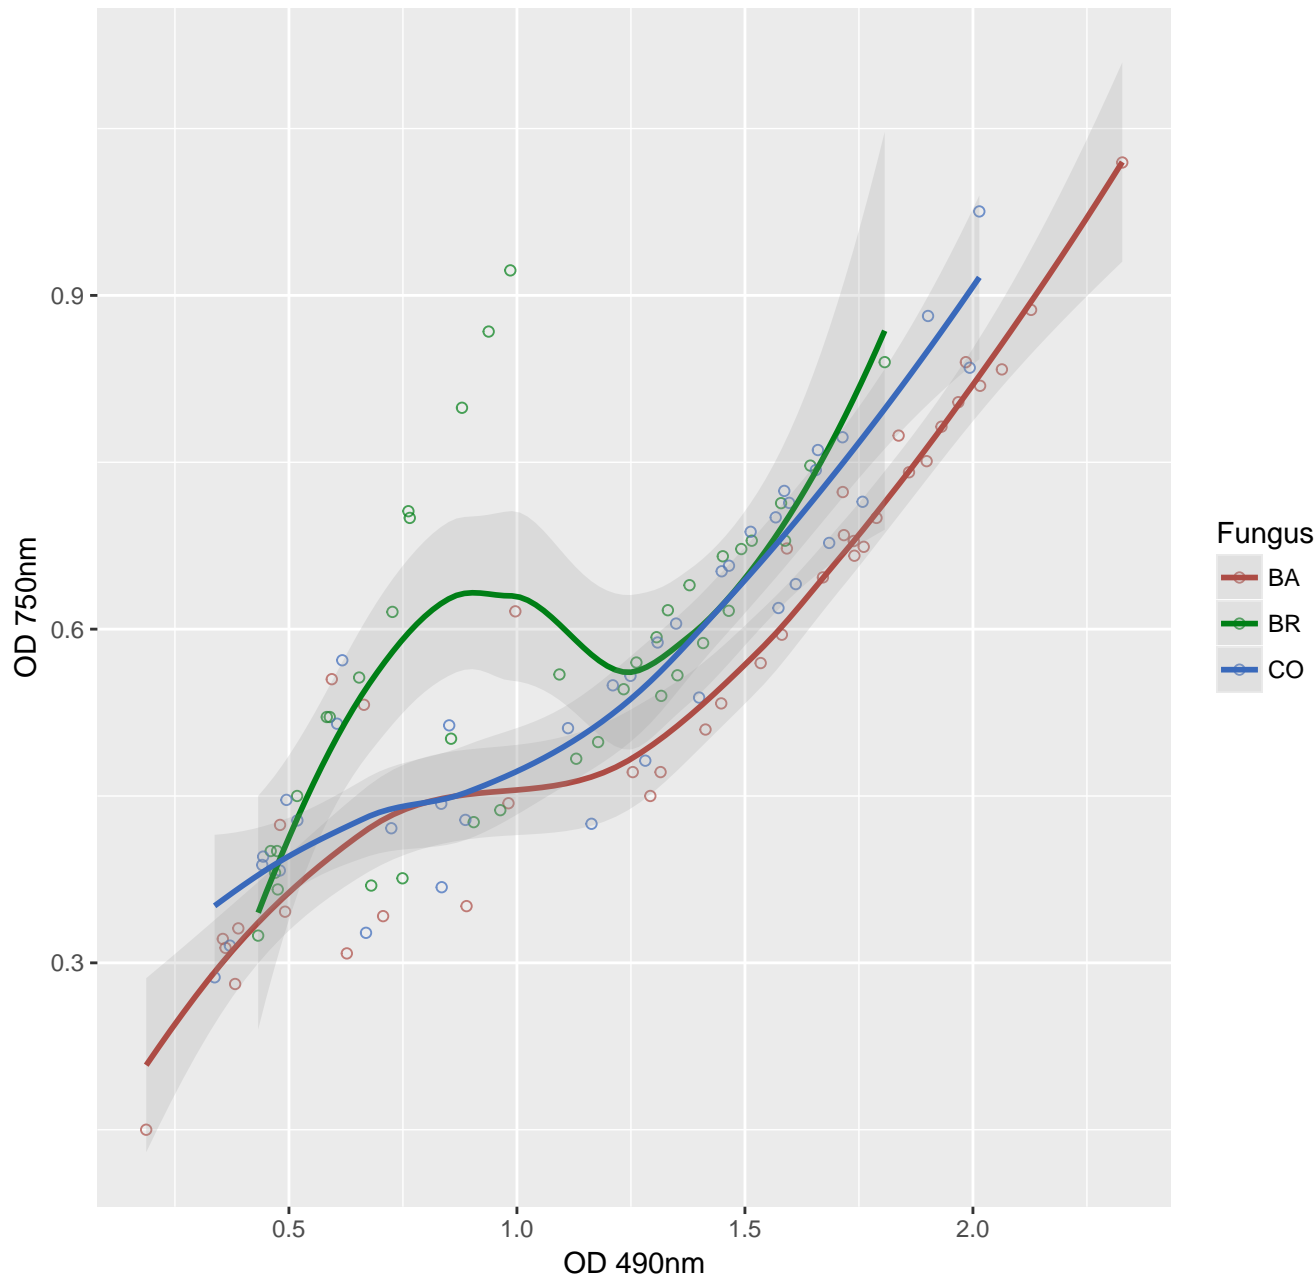

# L.Proline

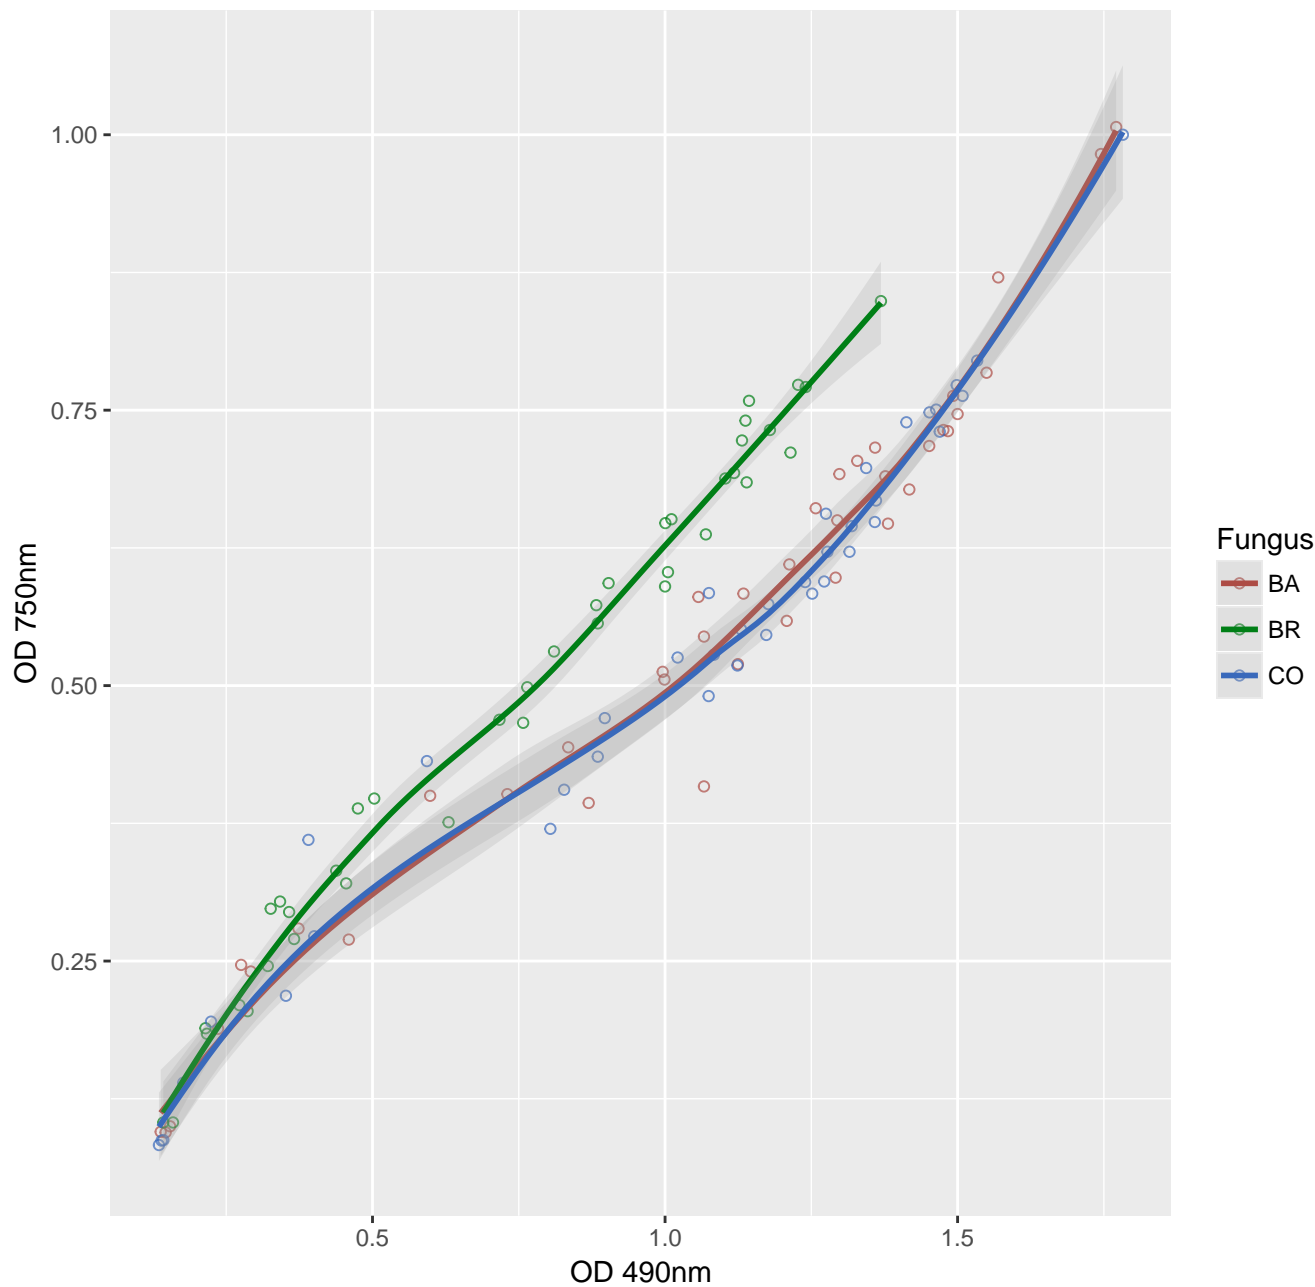

# L.PyroglutamicAcid

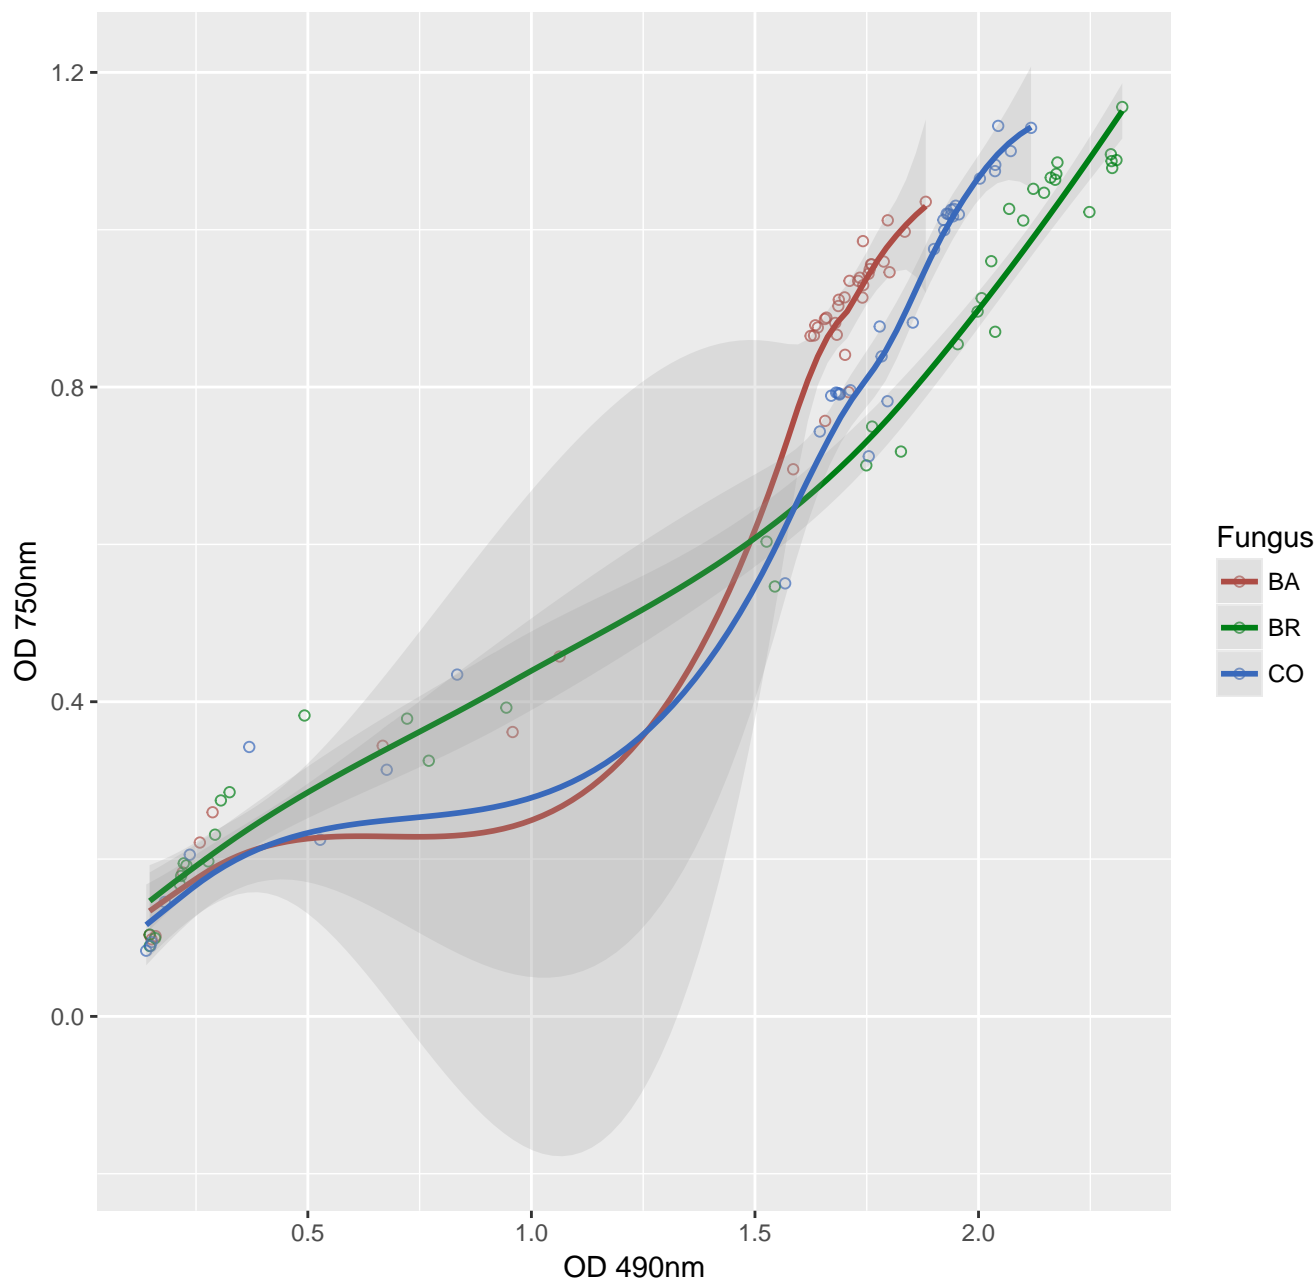

# L.Rhamnose

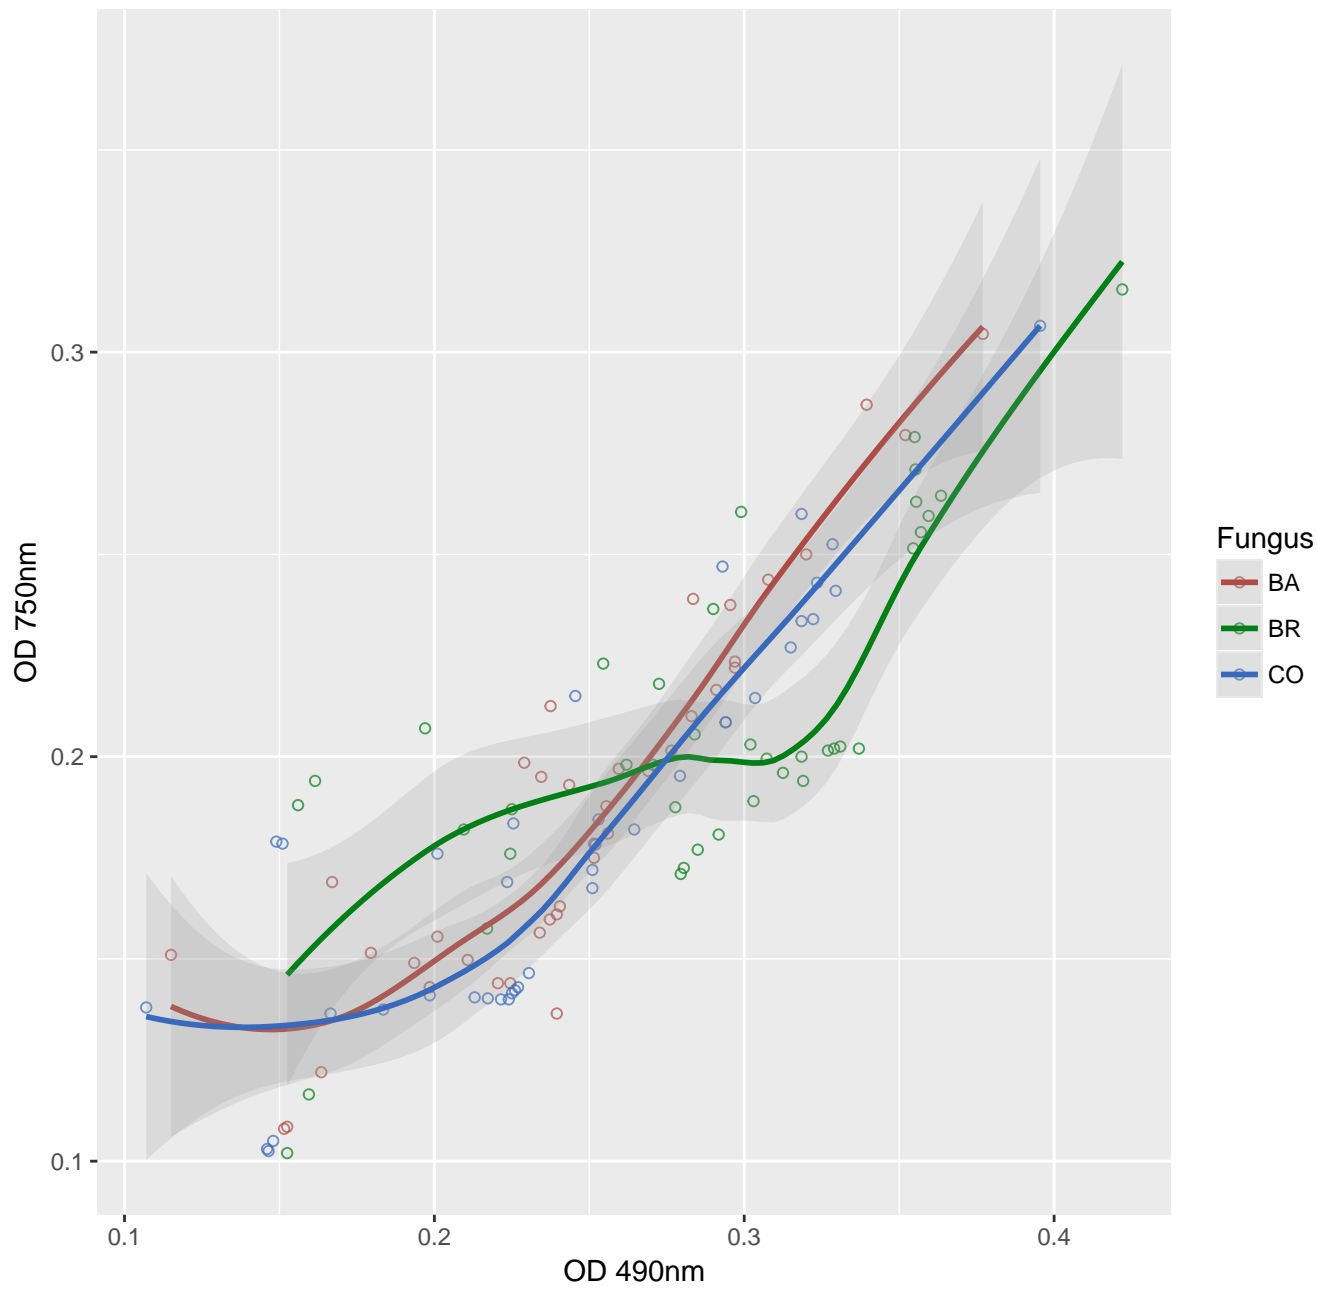

# L.Serine

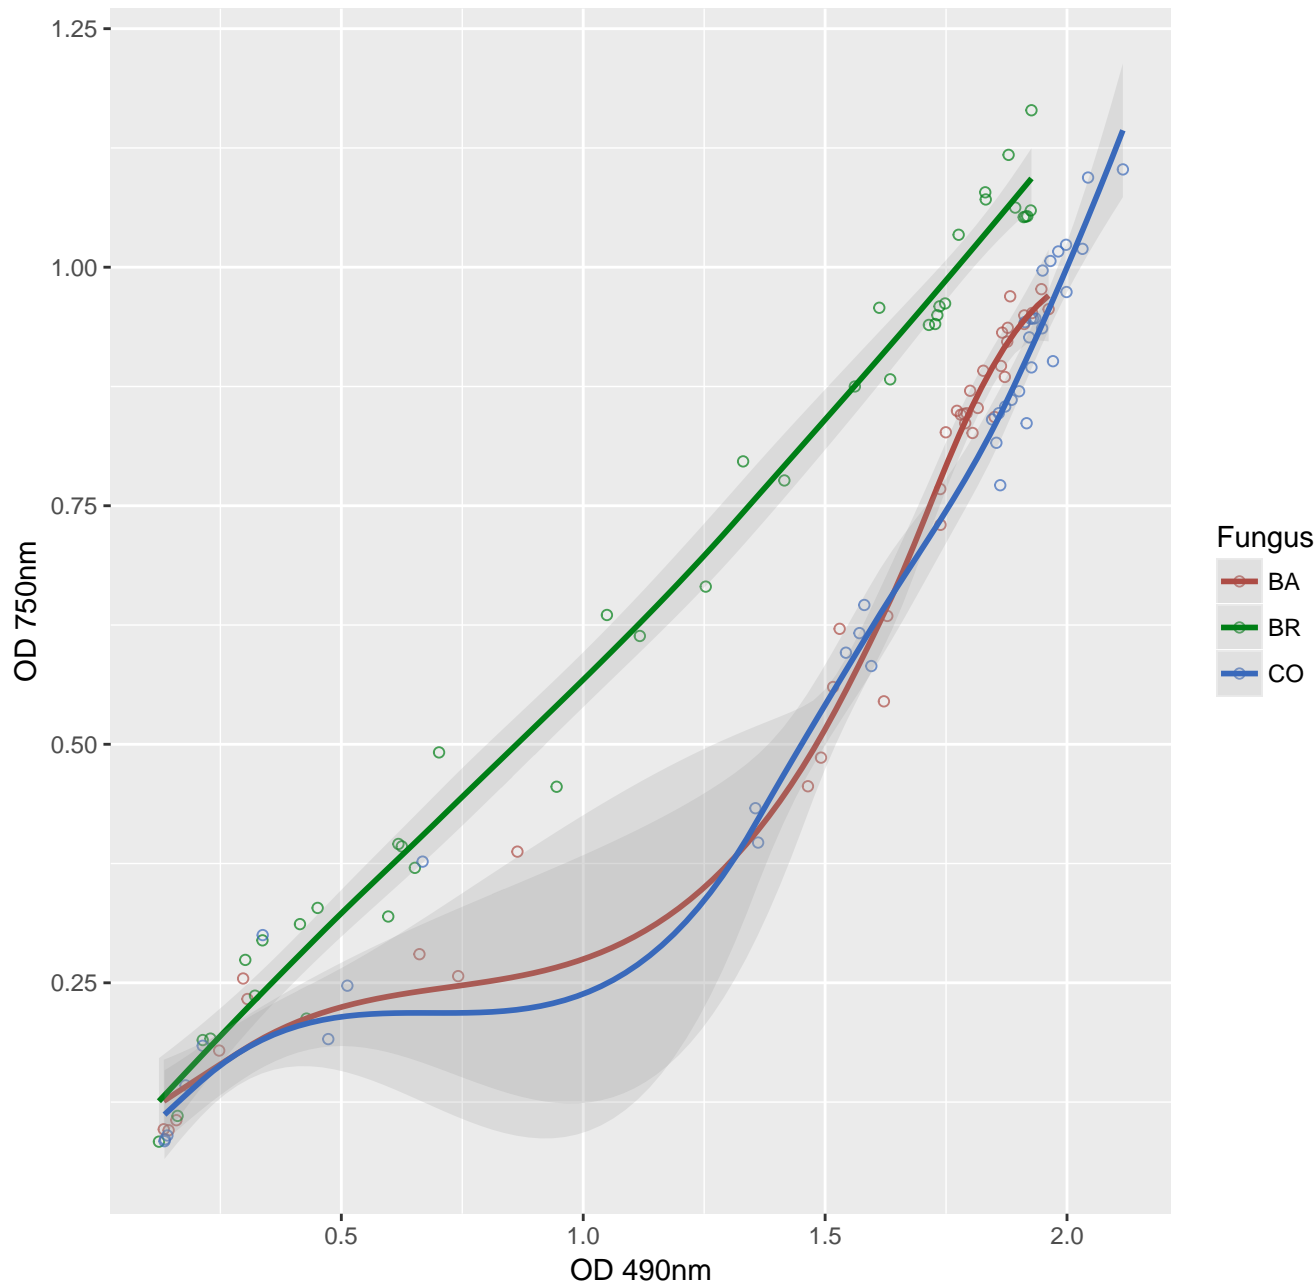



# L.Sorbose

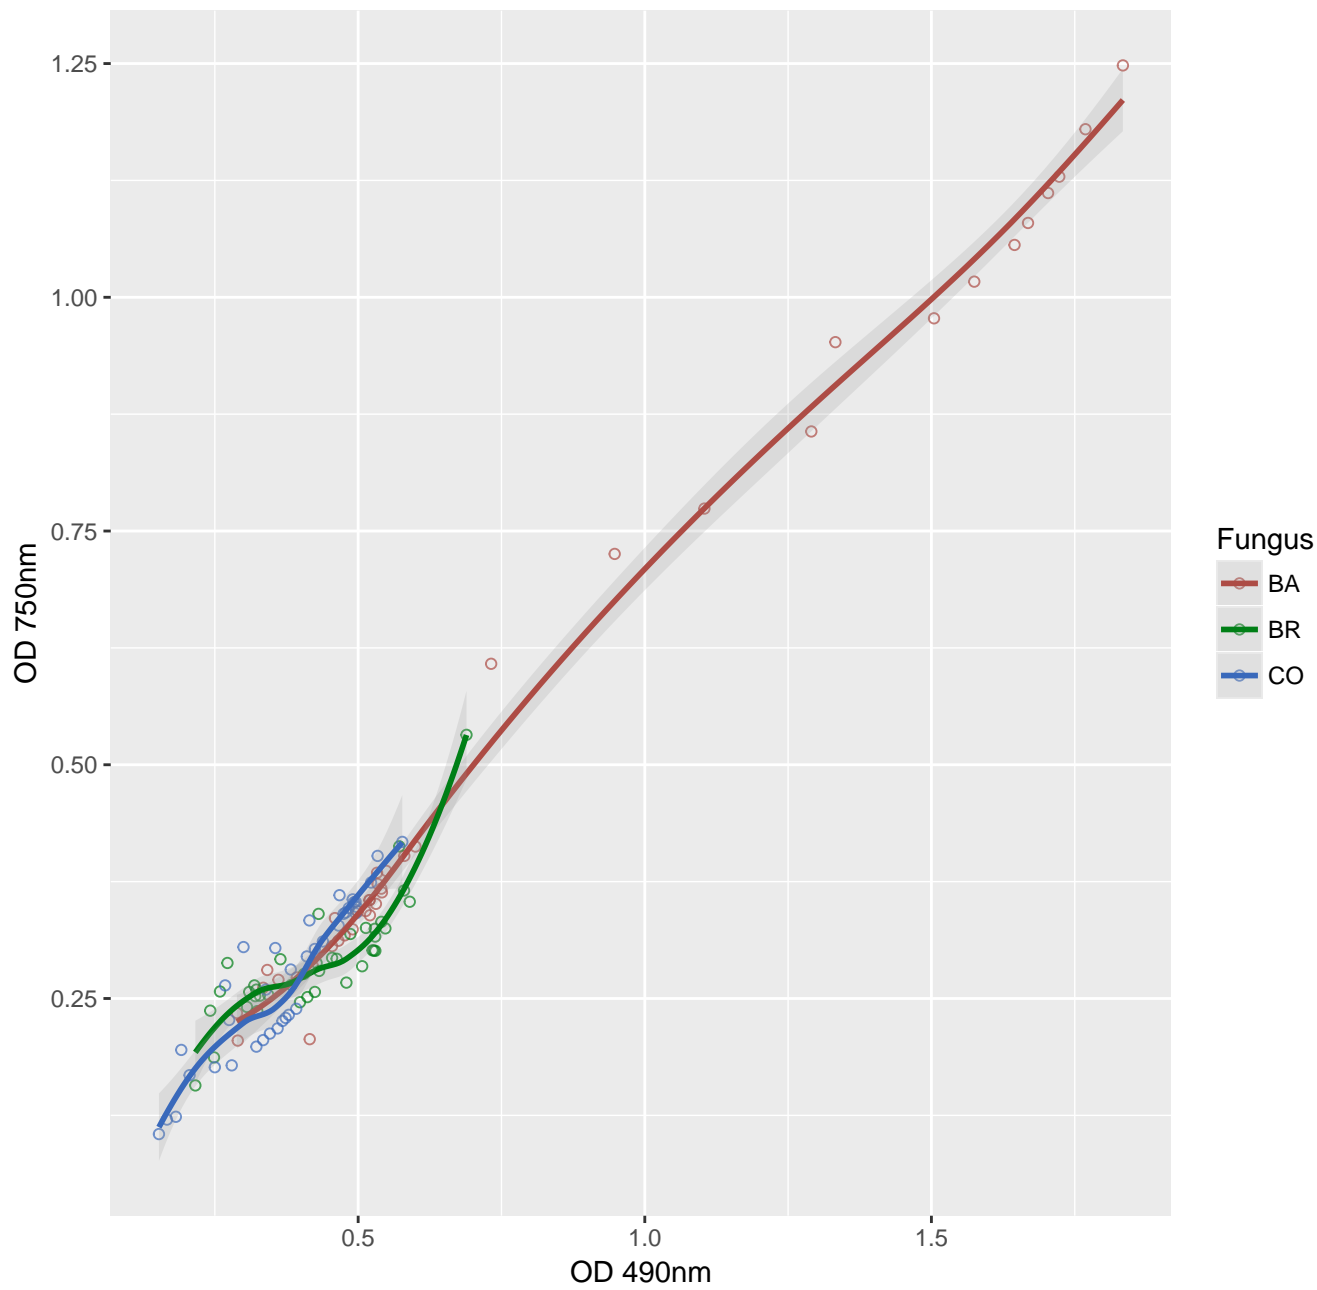

# L.Threonine

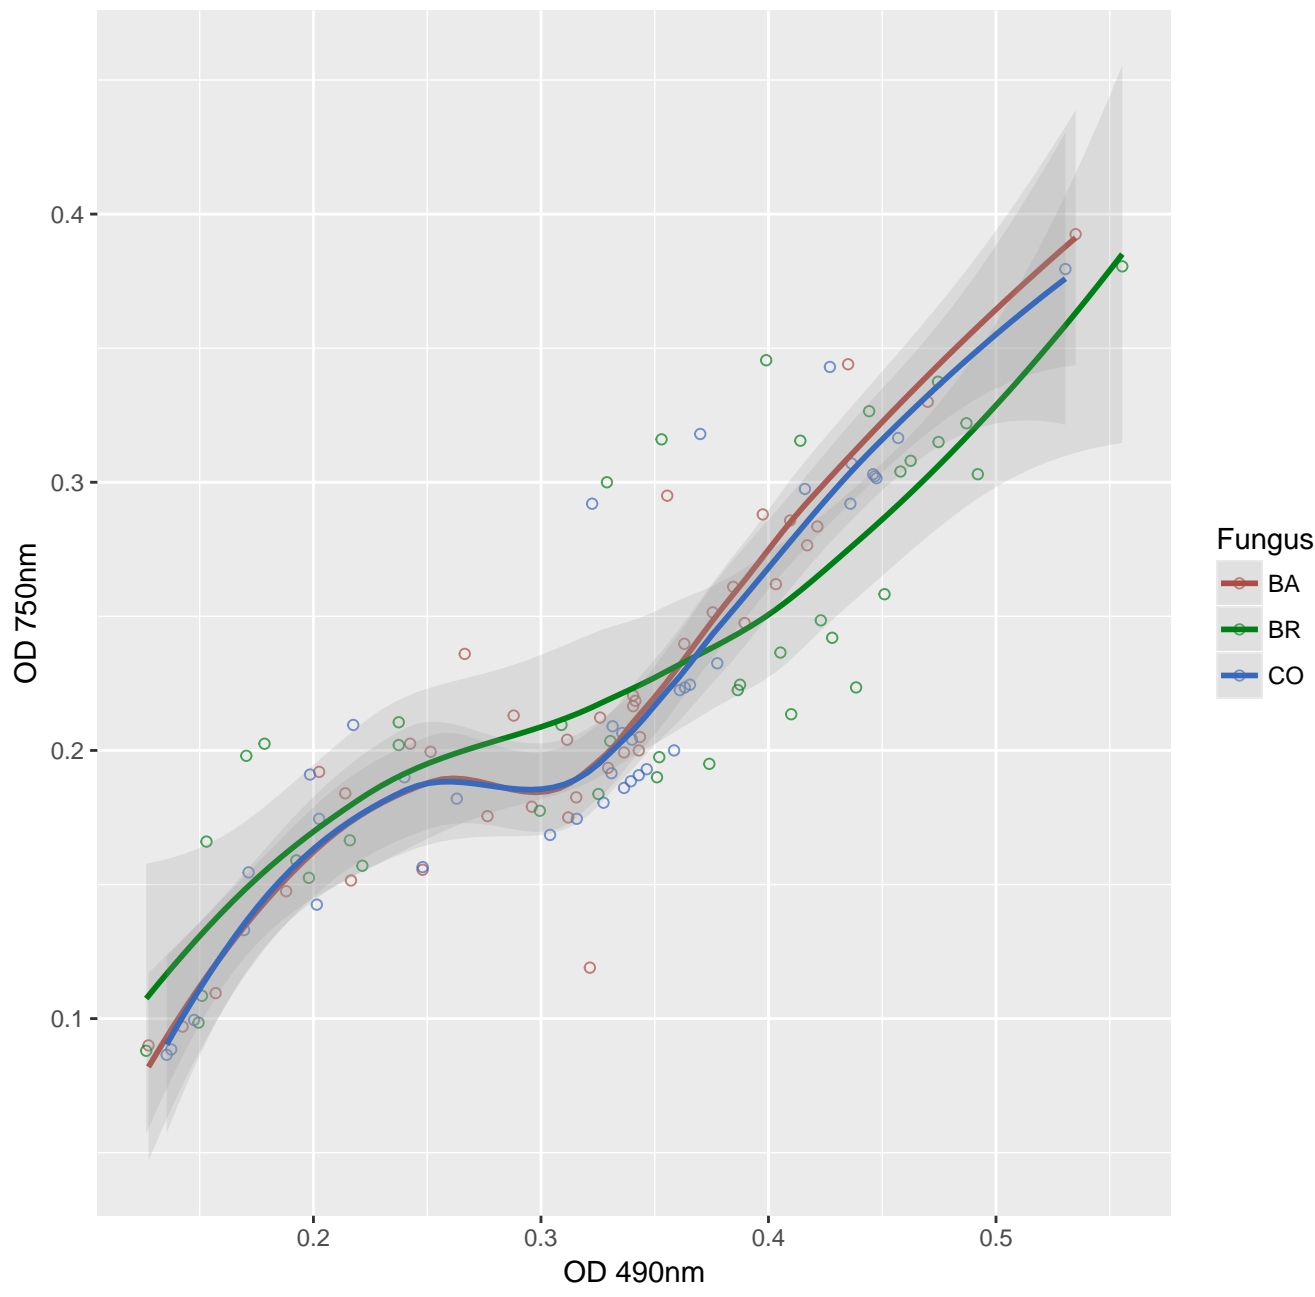

# Maltitol

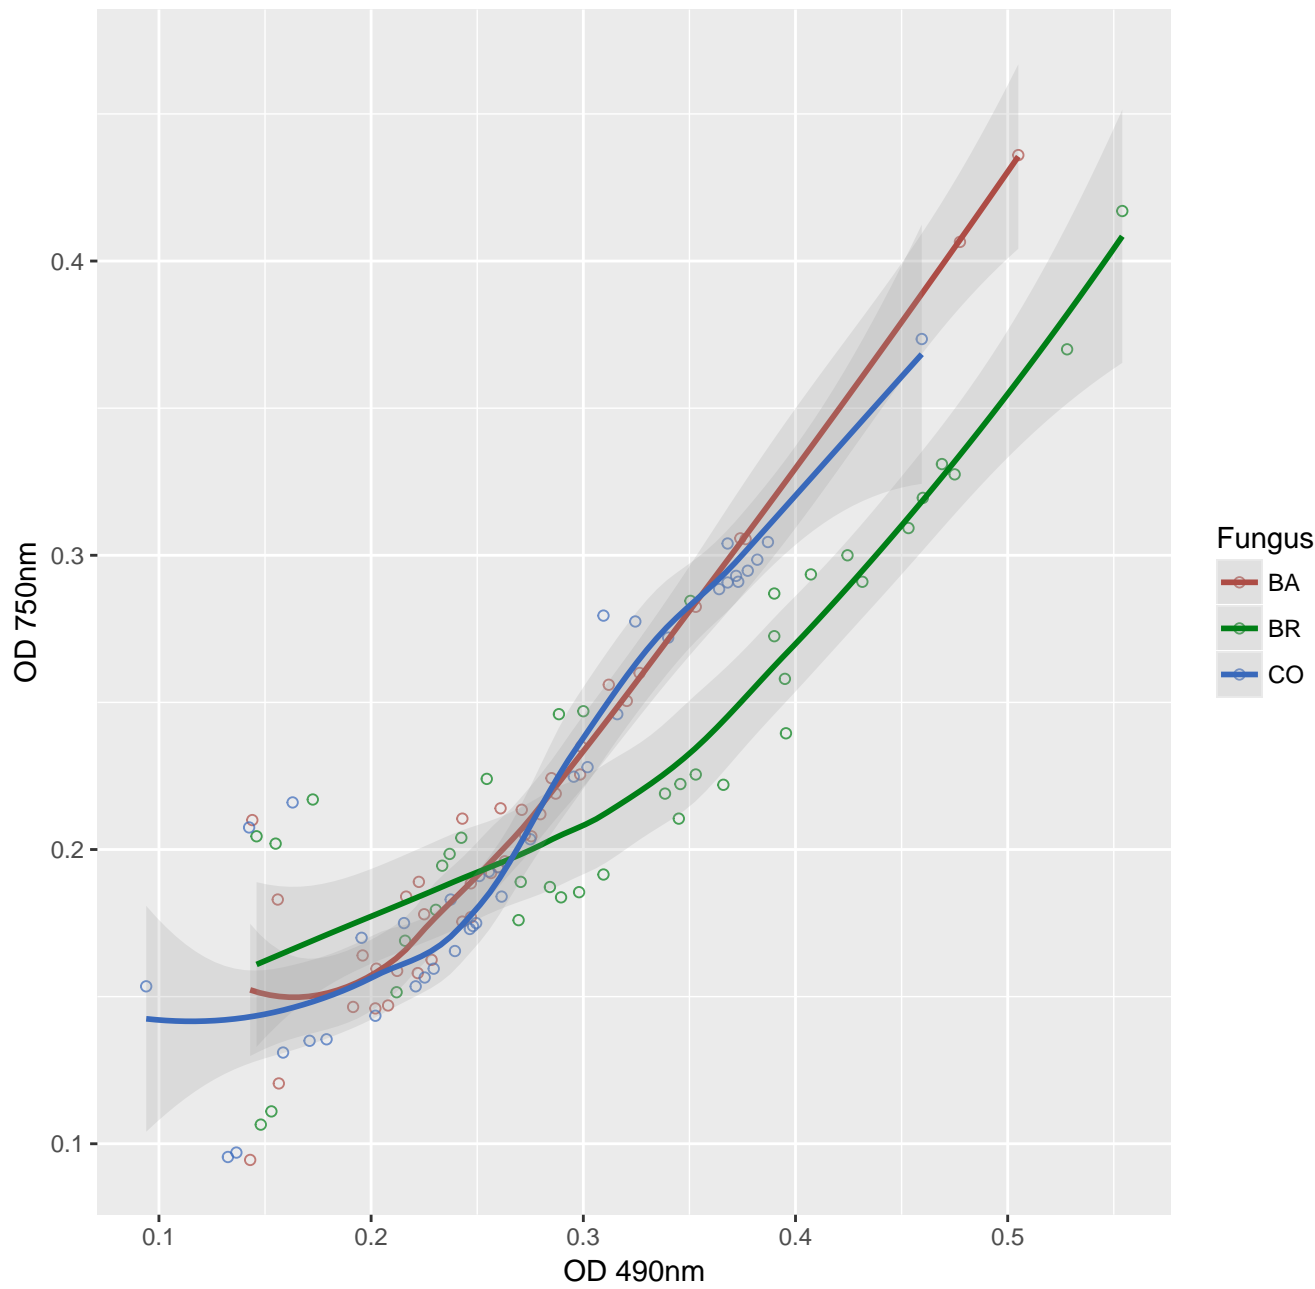

# Maltose

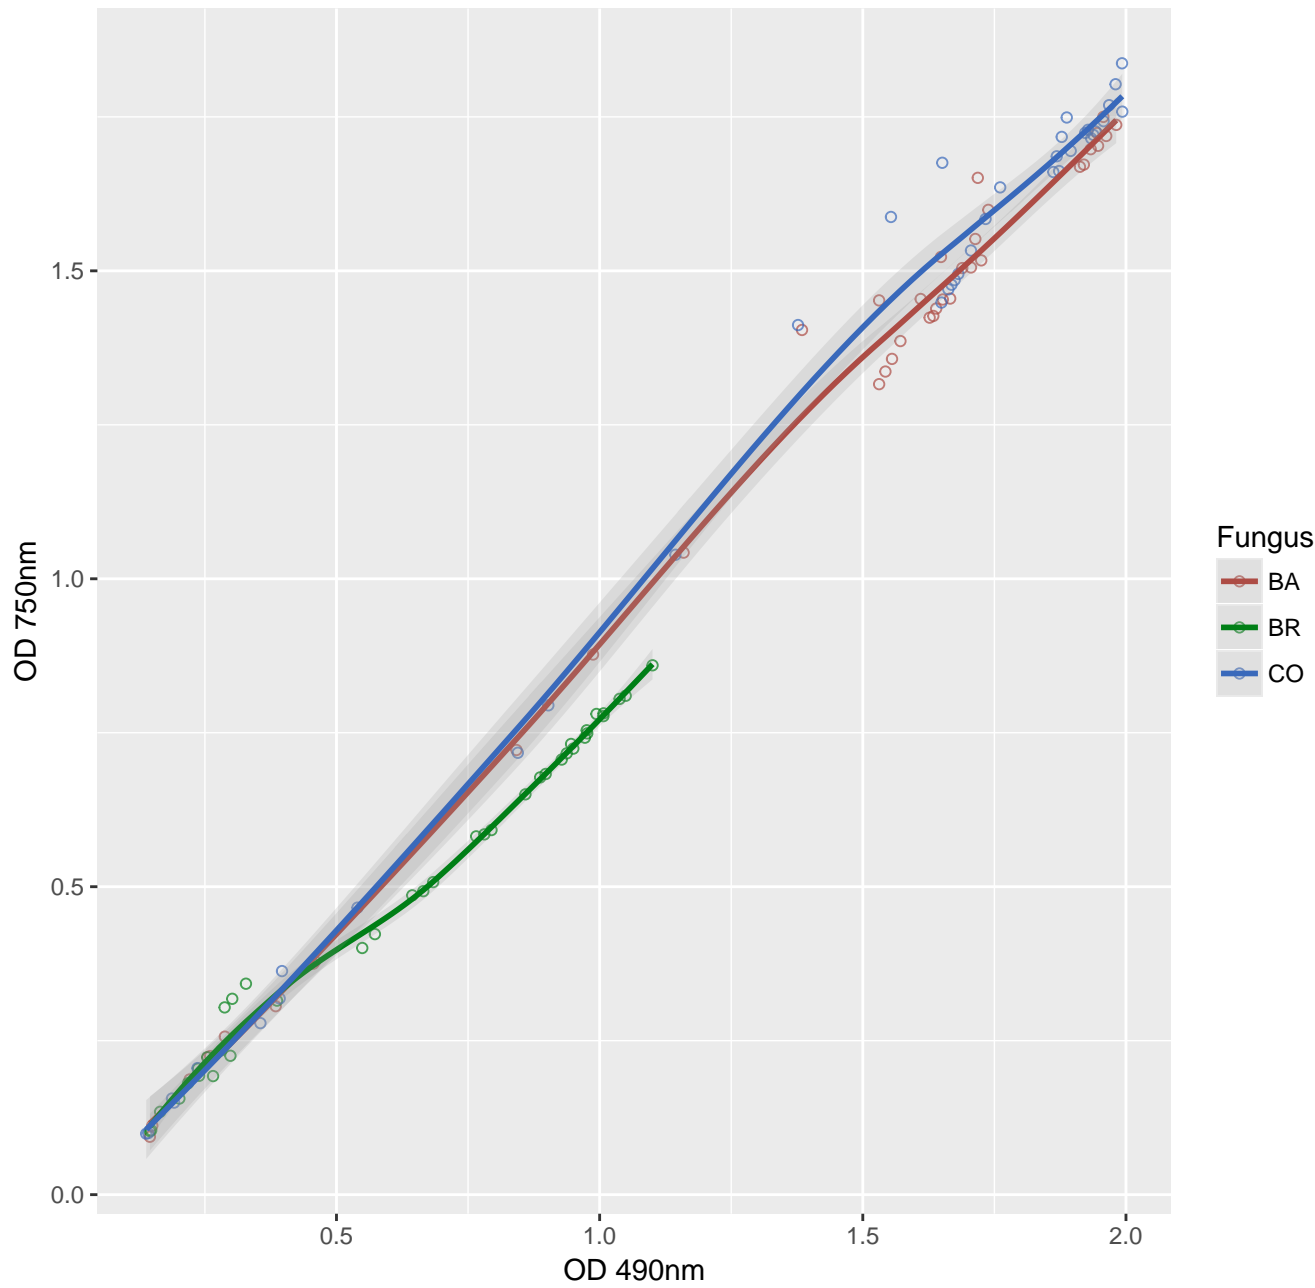

# Maltotriose

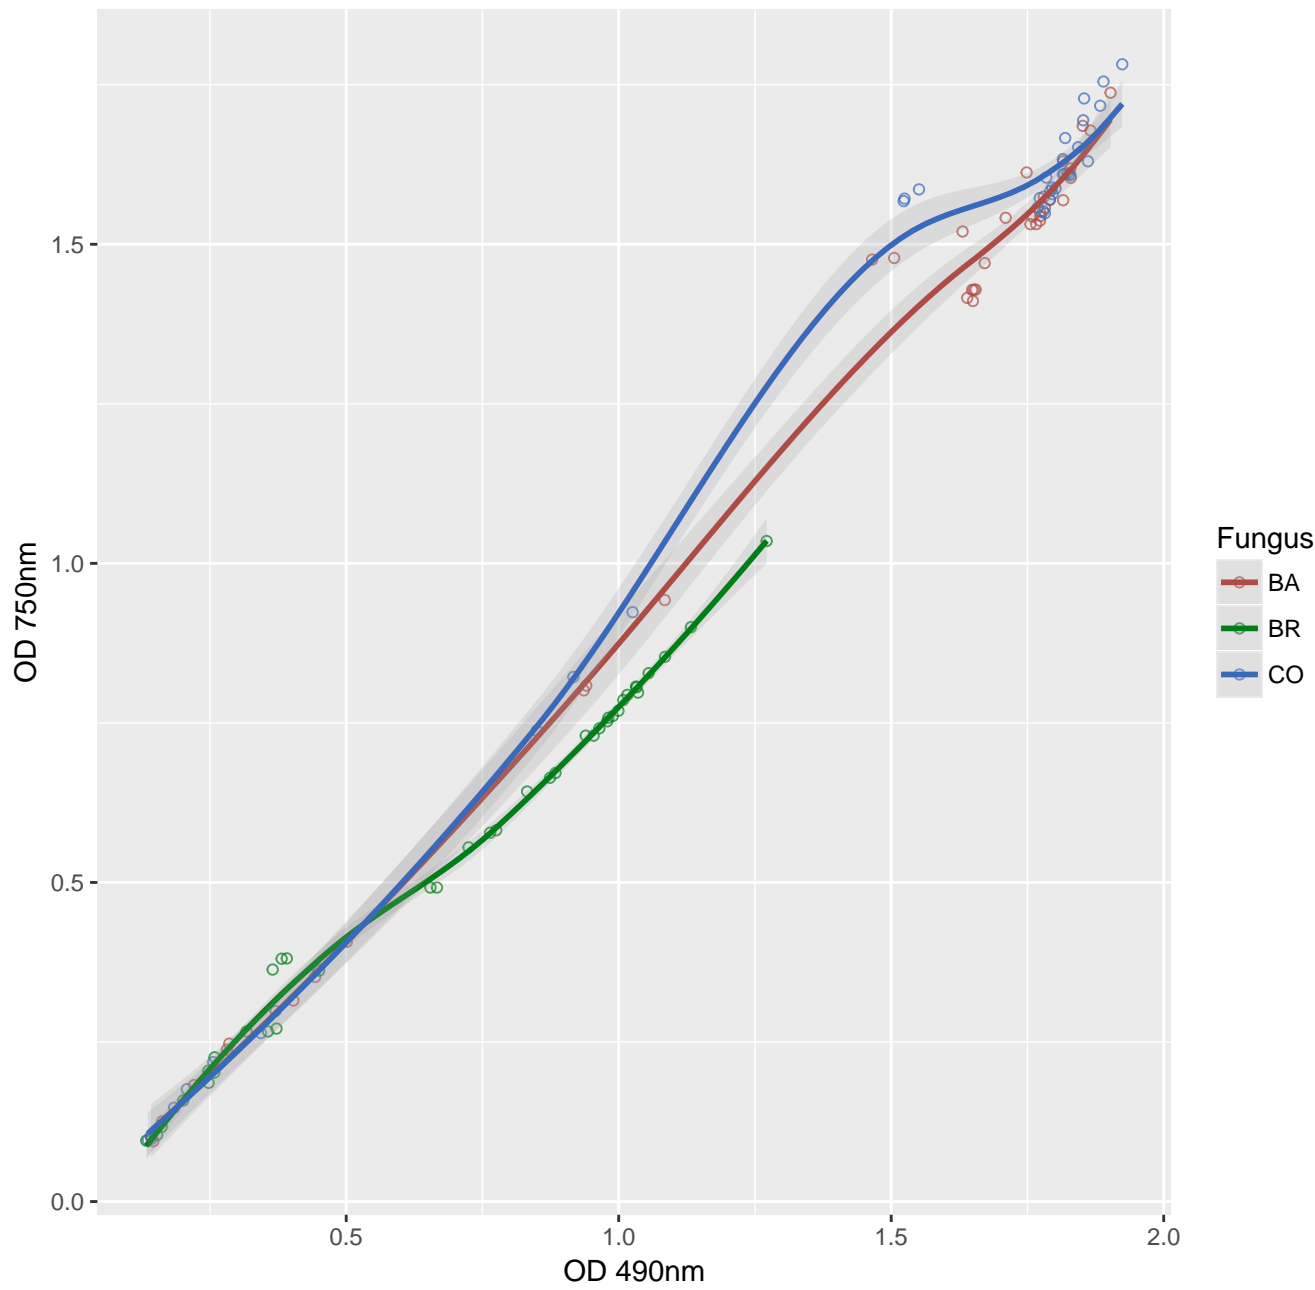

m.Inositol

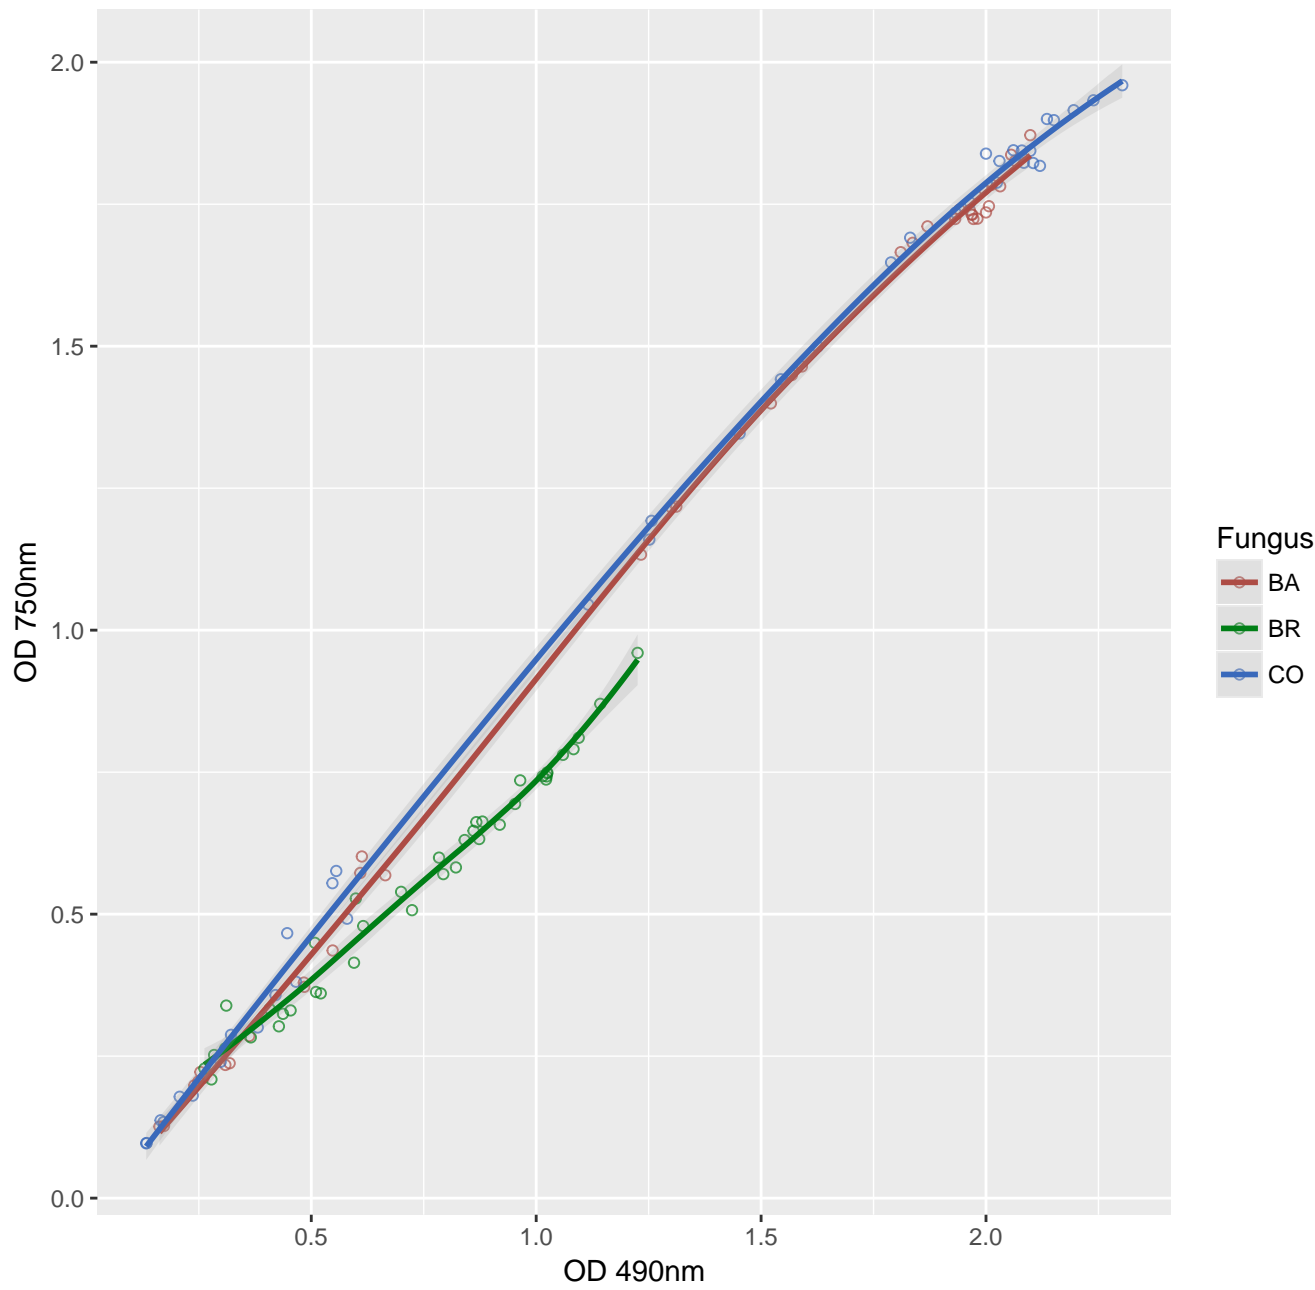

# N.Acetyl.D.Galactosamine

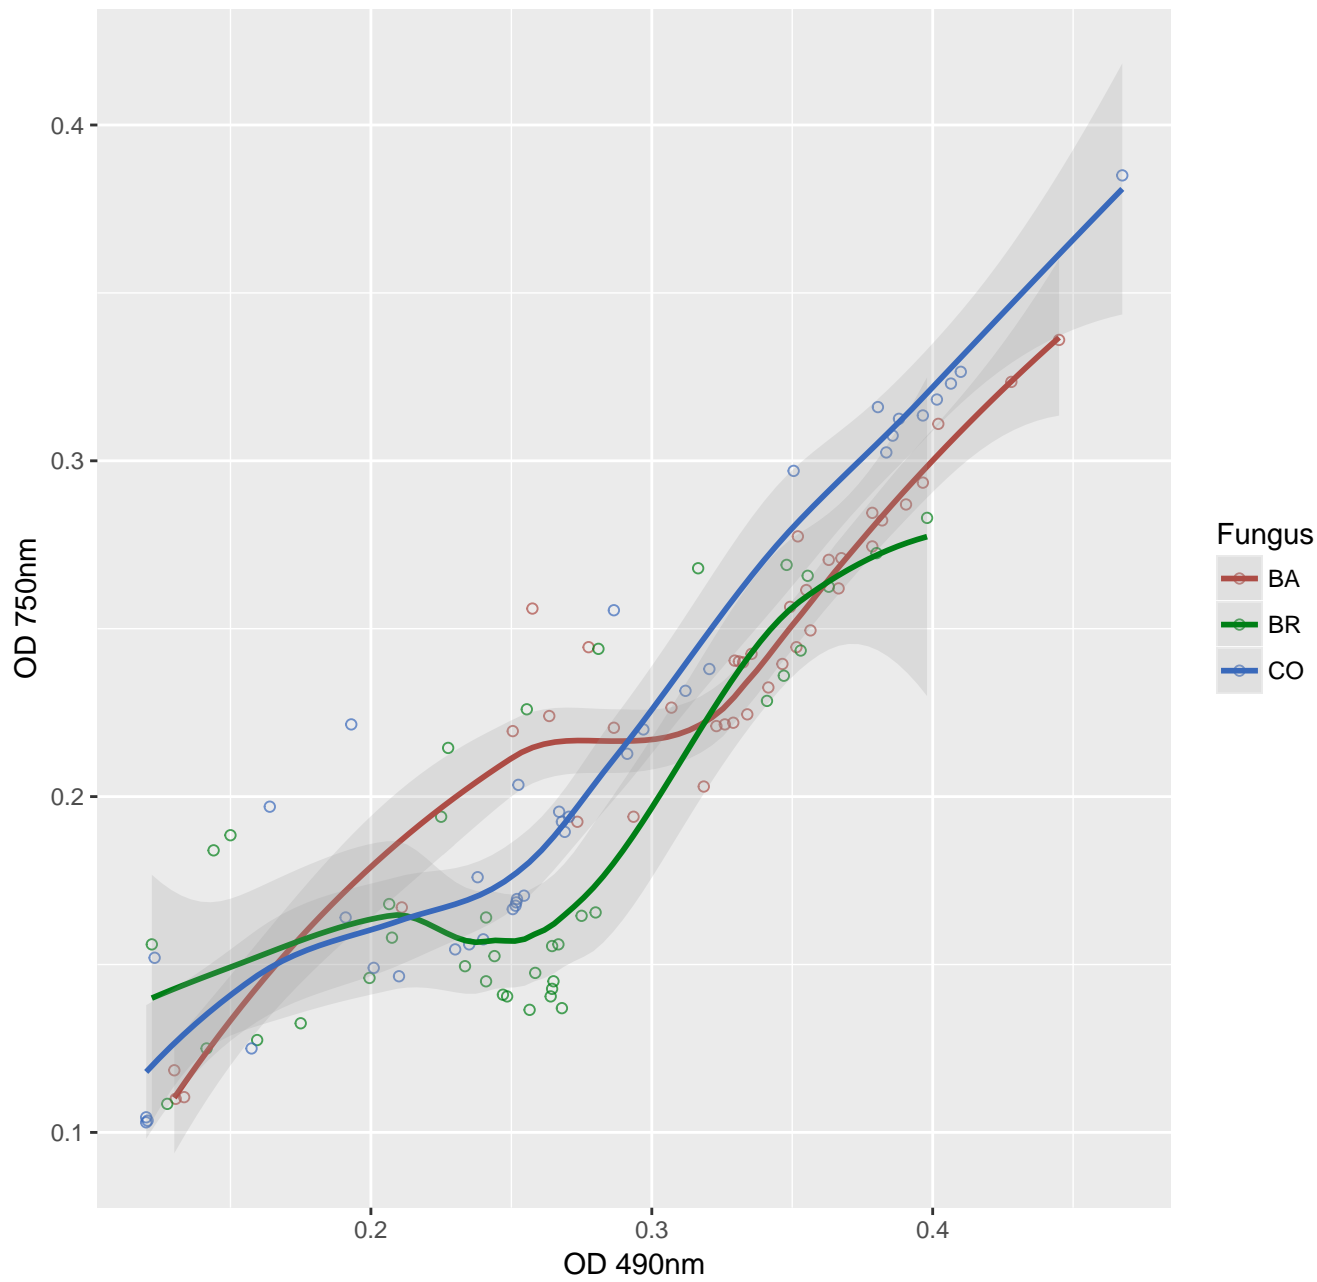

# N.Acetyl.D.Glucosamine

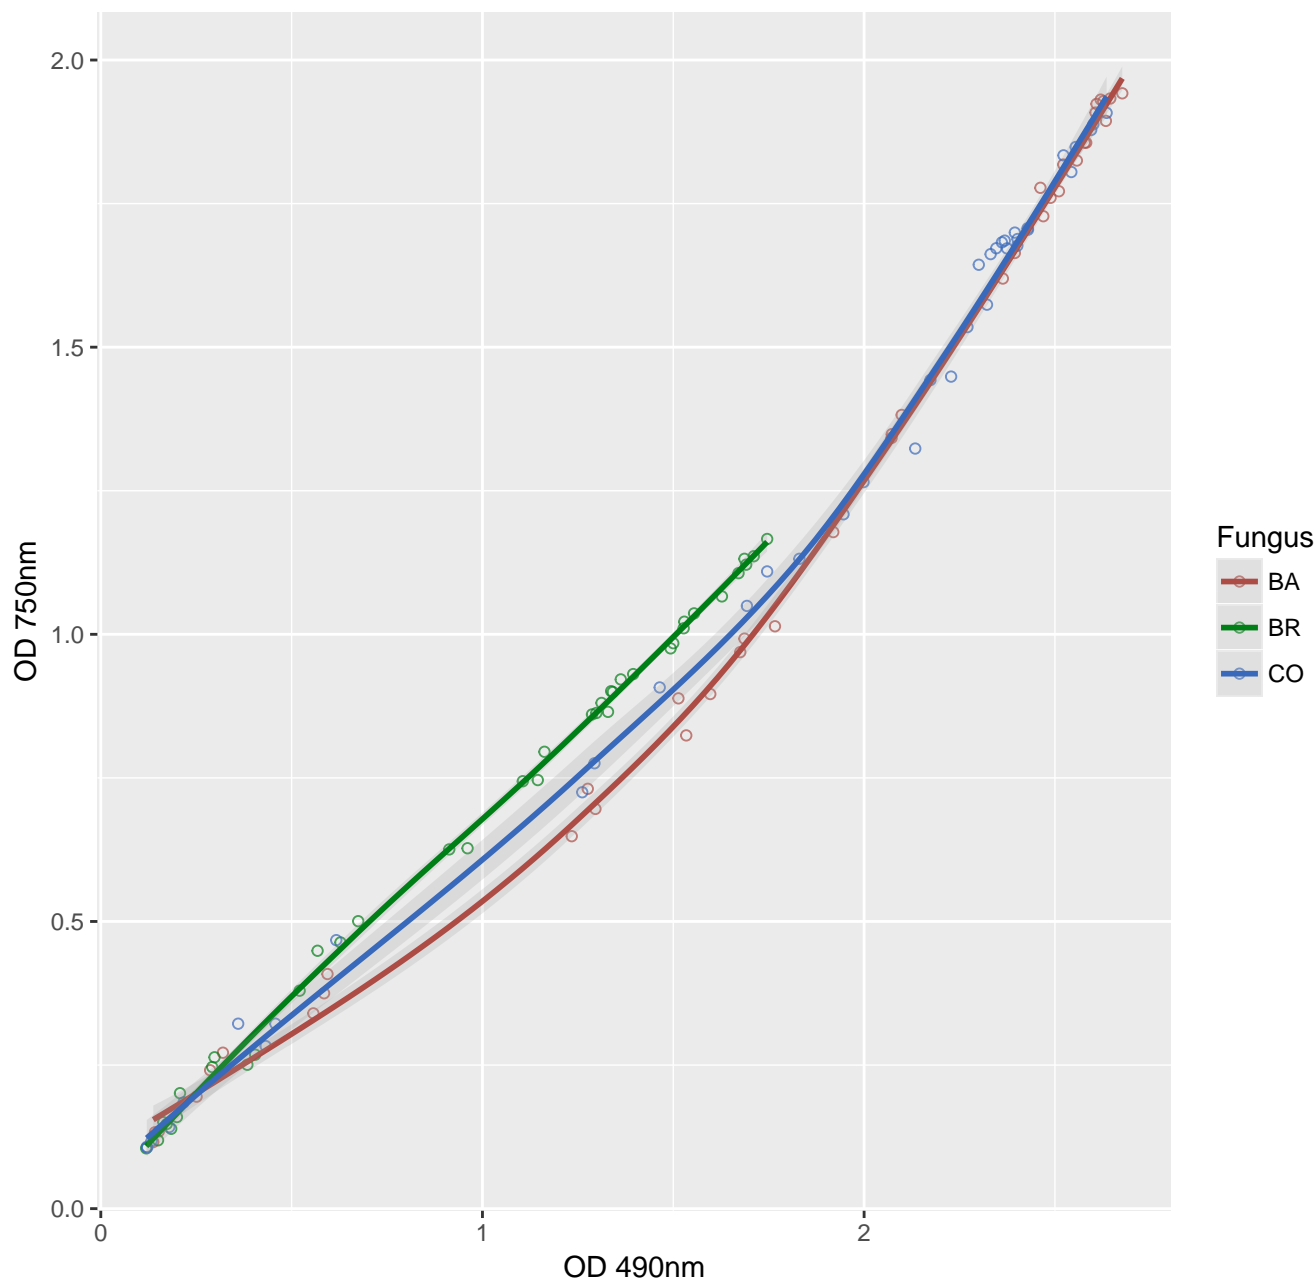



# N.Acetyl.D.Mannosamine

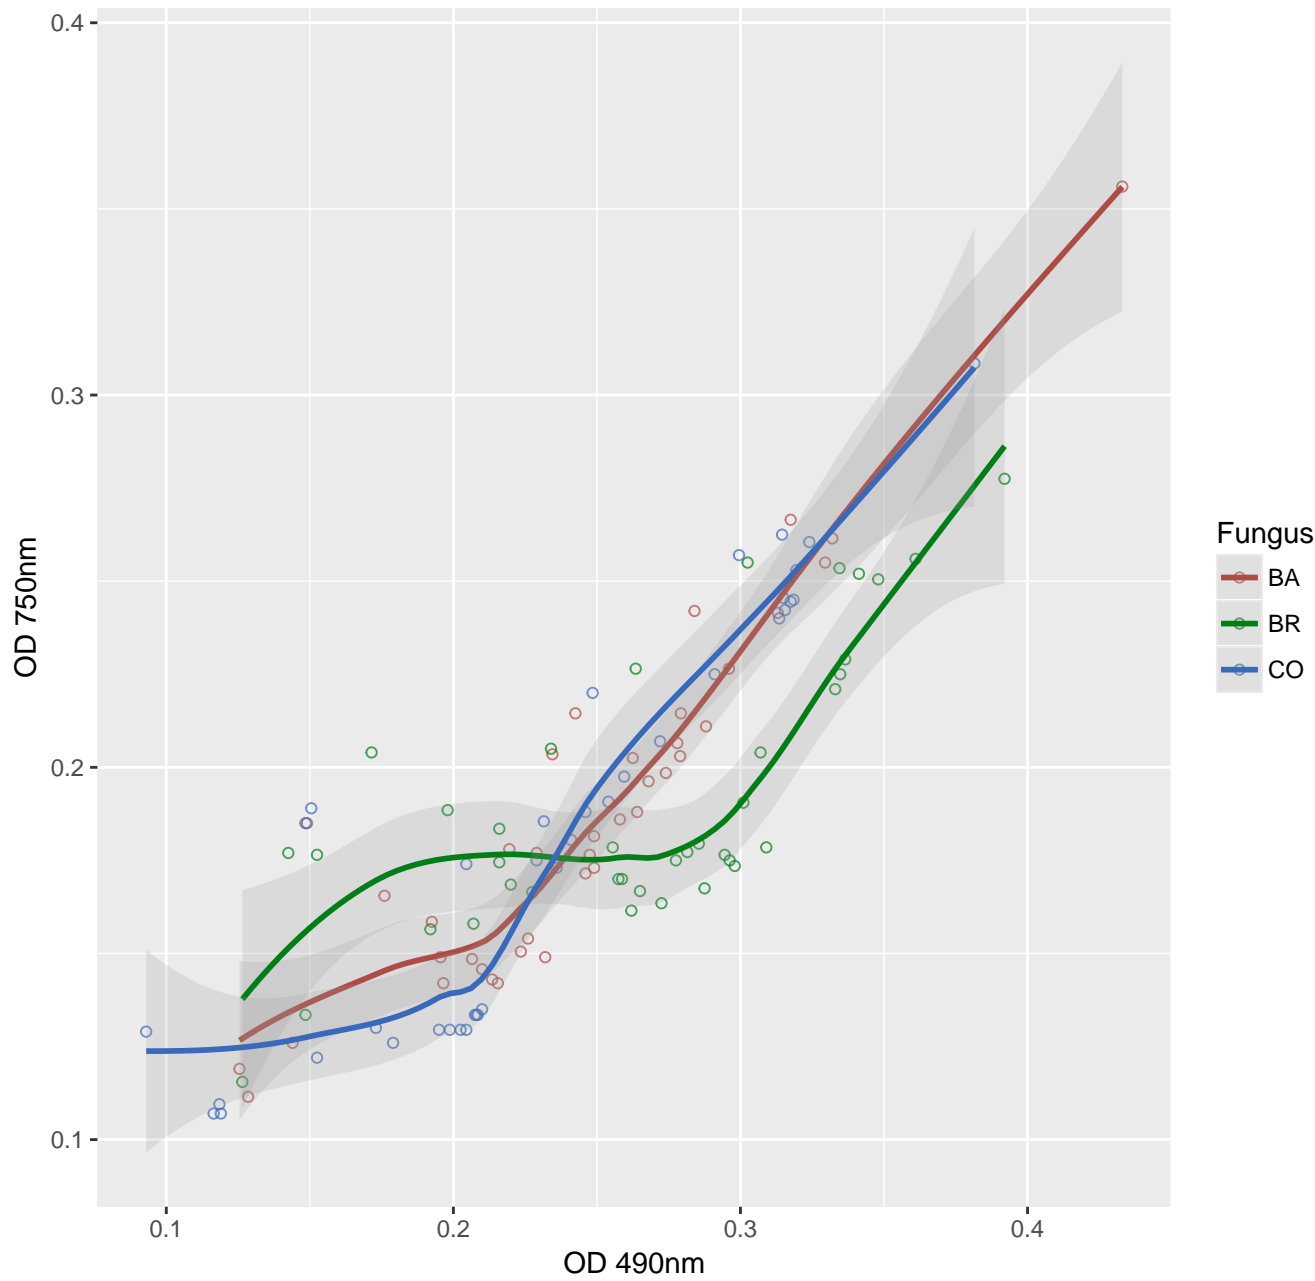

# N.Acetyly.L.GlutamicAcid

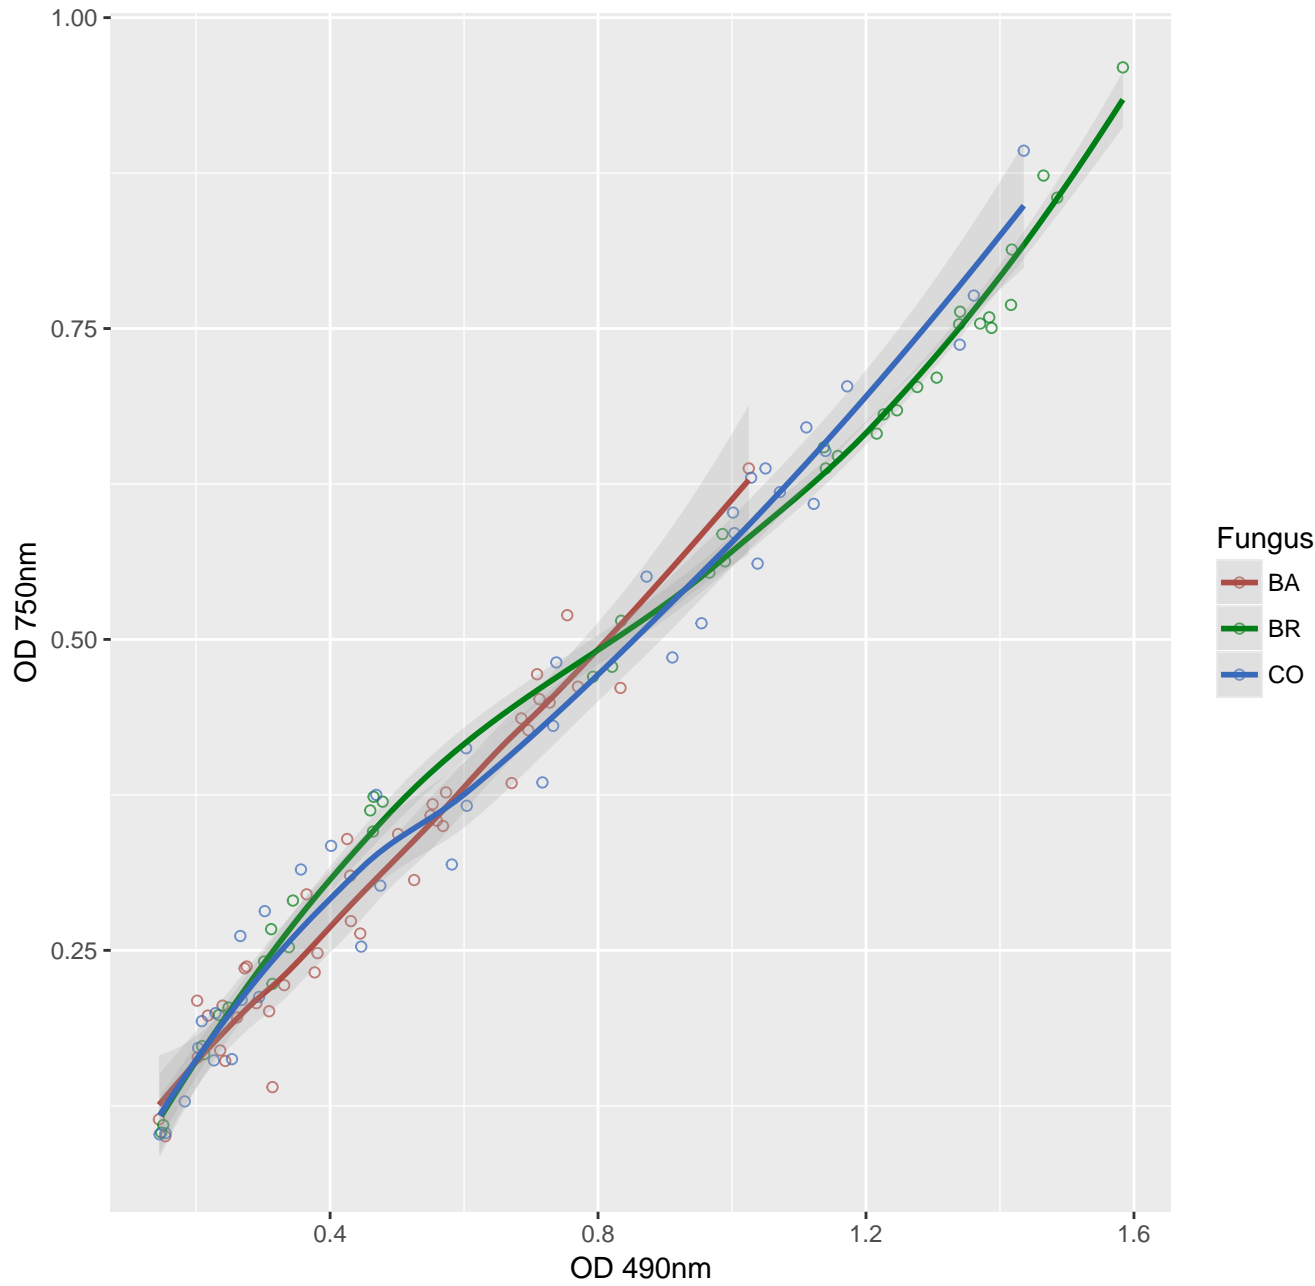

# Palatinose

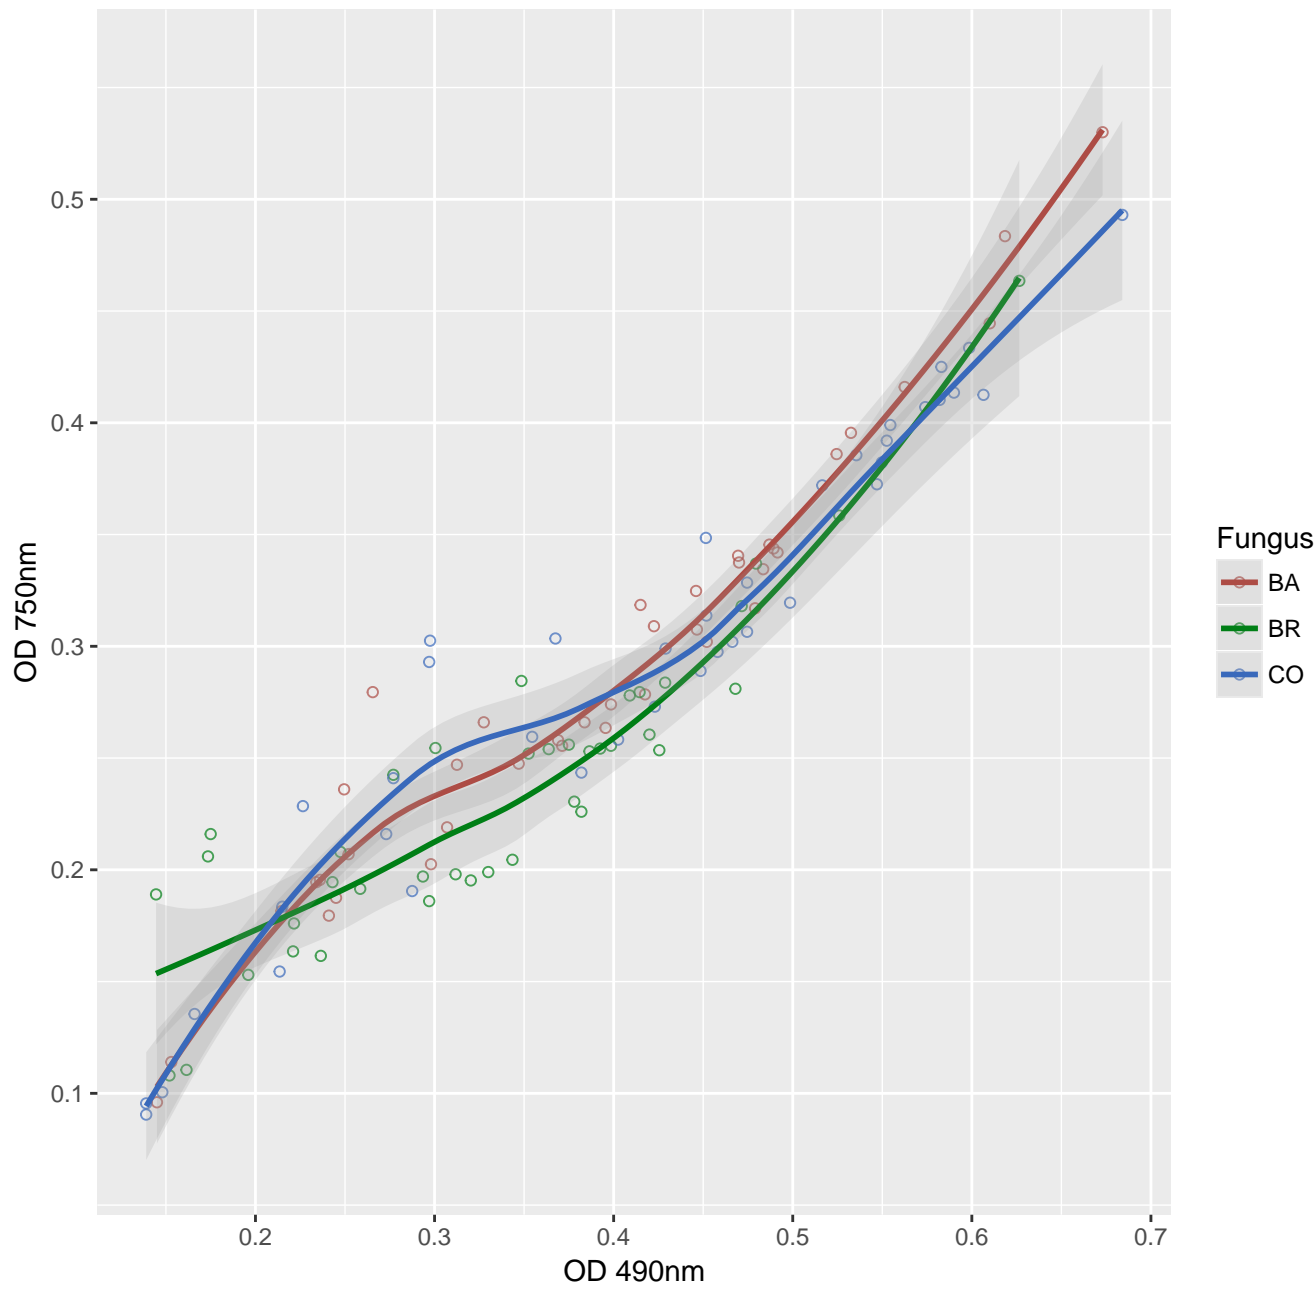

# P.Hydroxyphenyl.aceticAcid

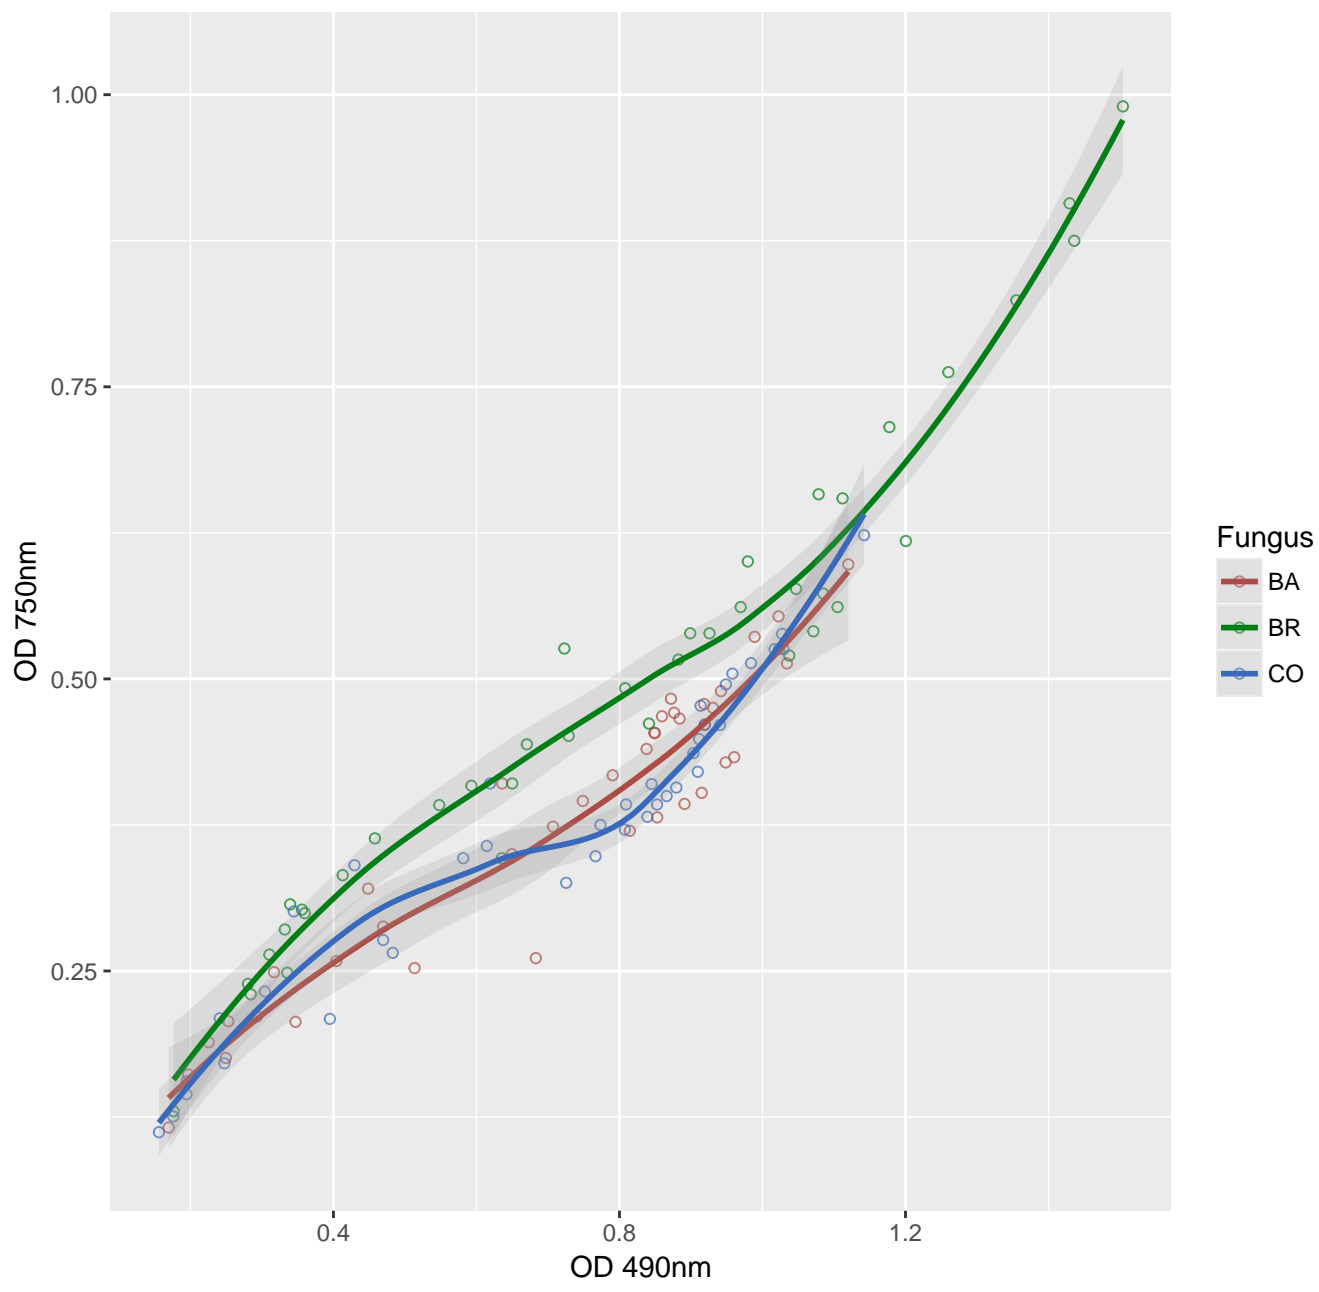

# Putrescine

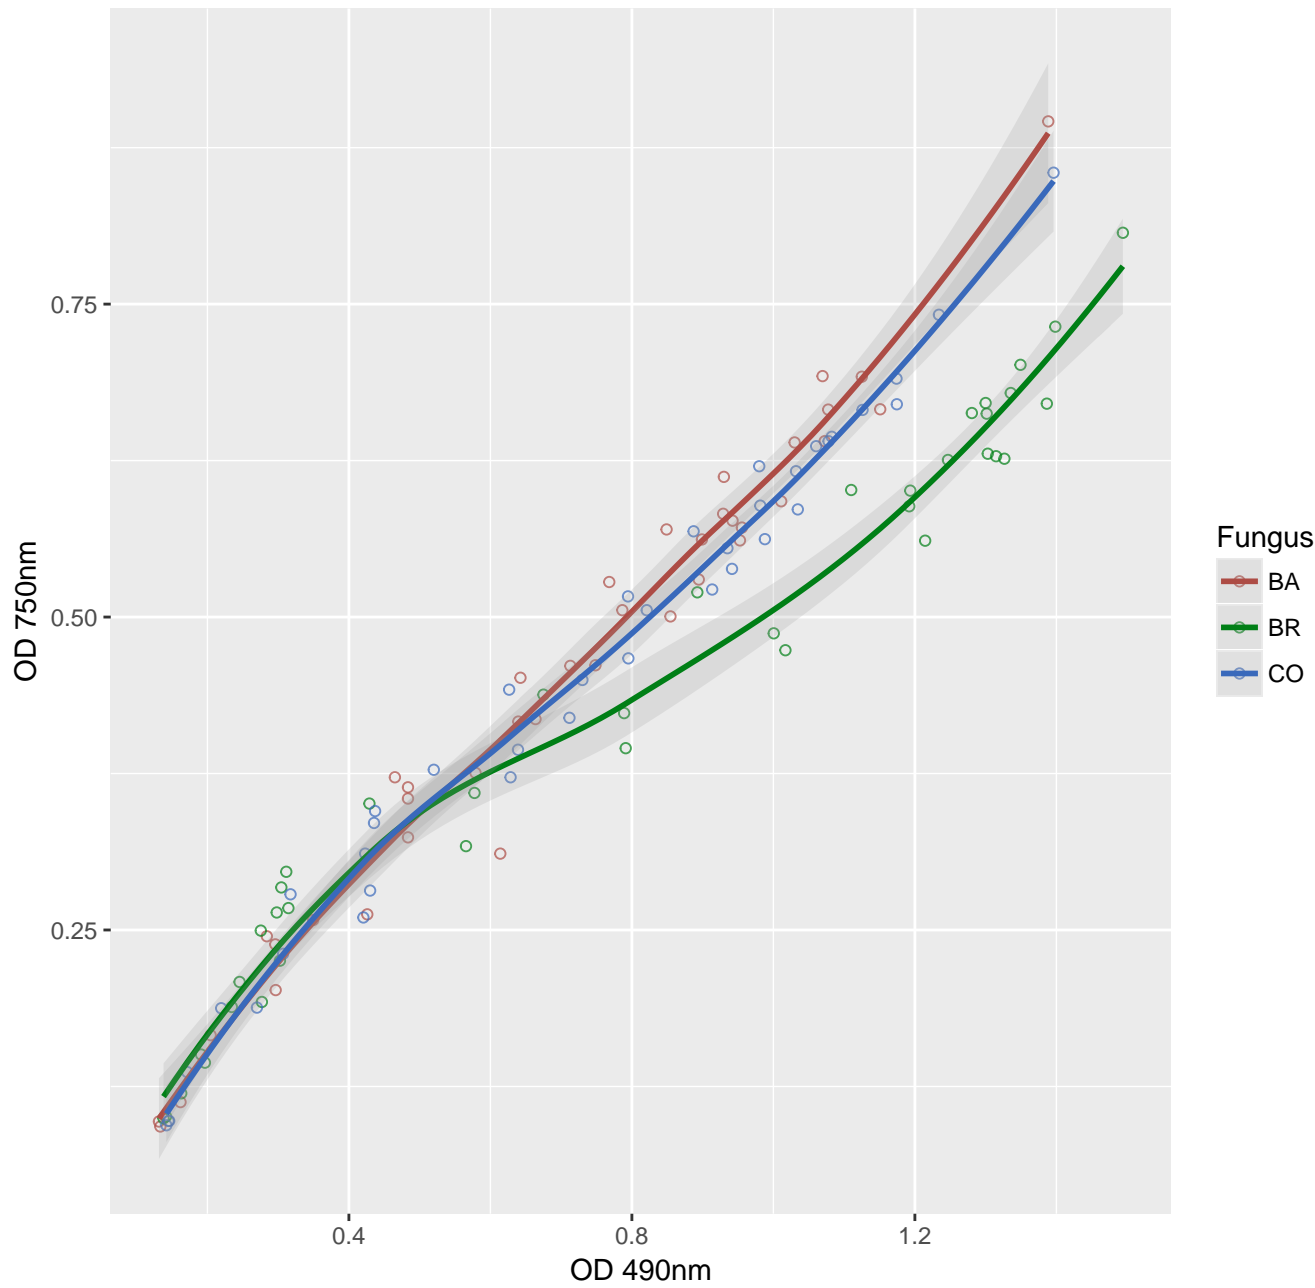

# QuinicAcid

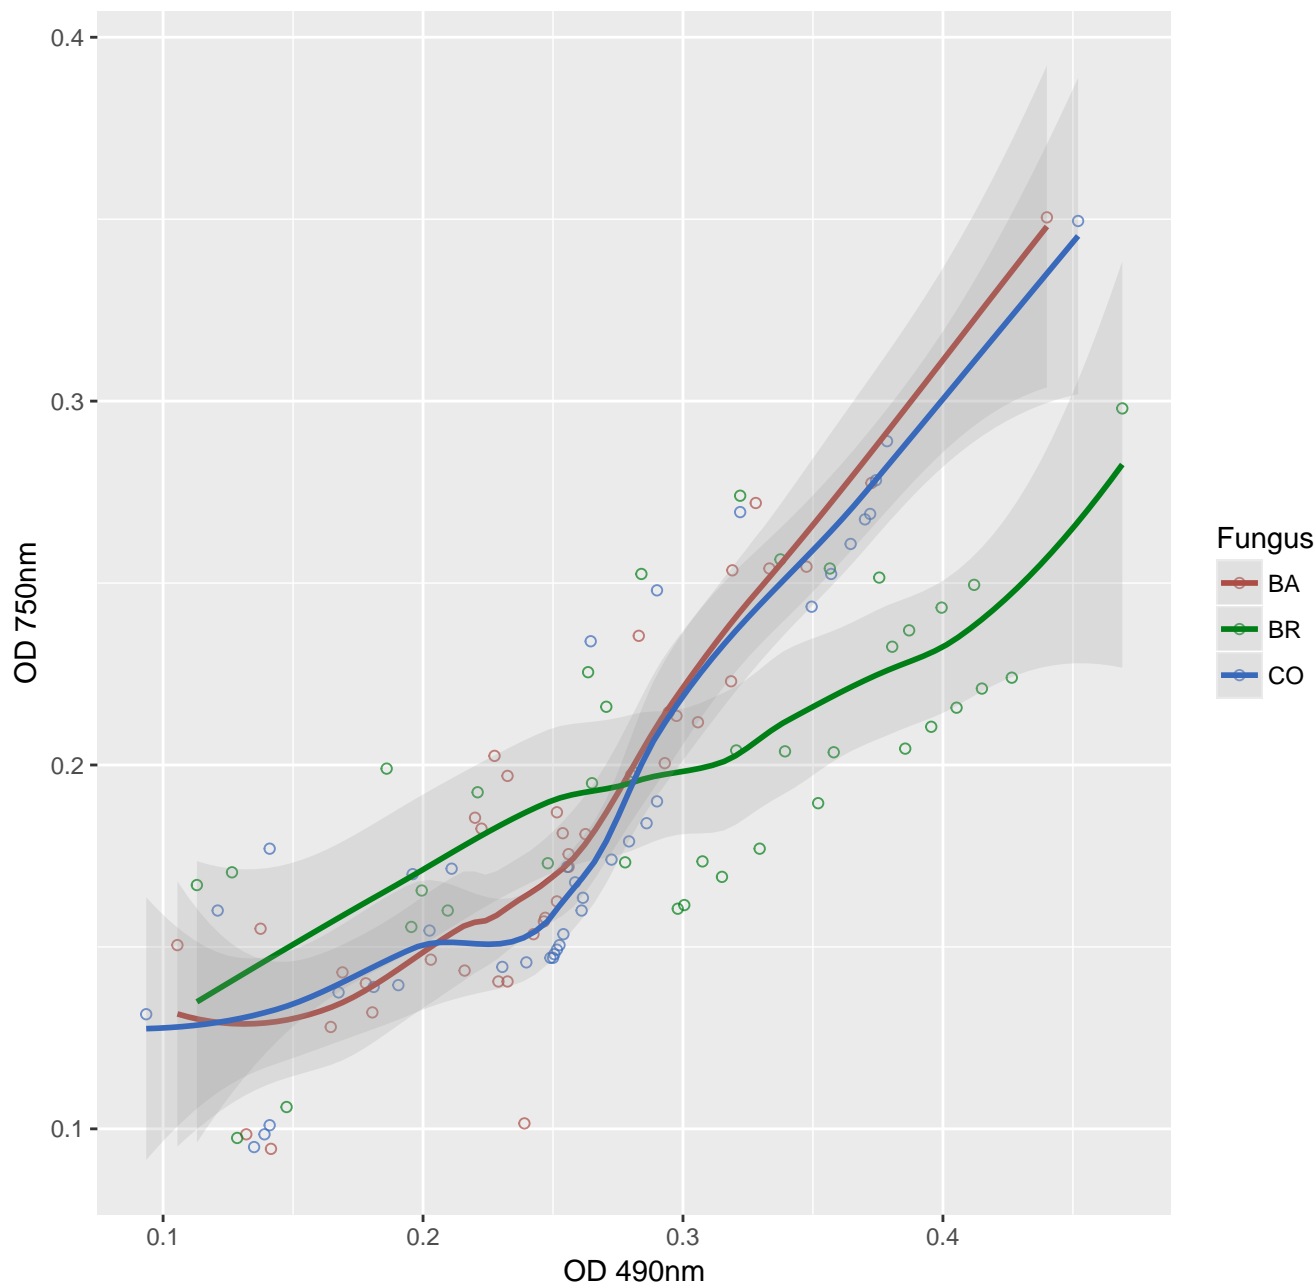

# Salicin

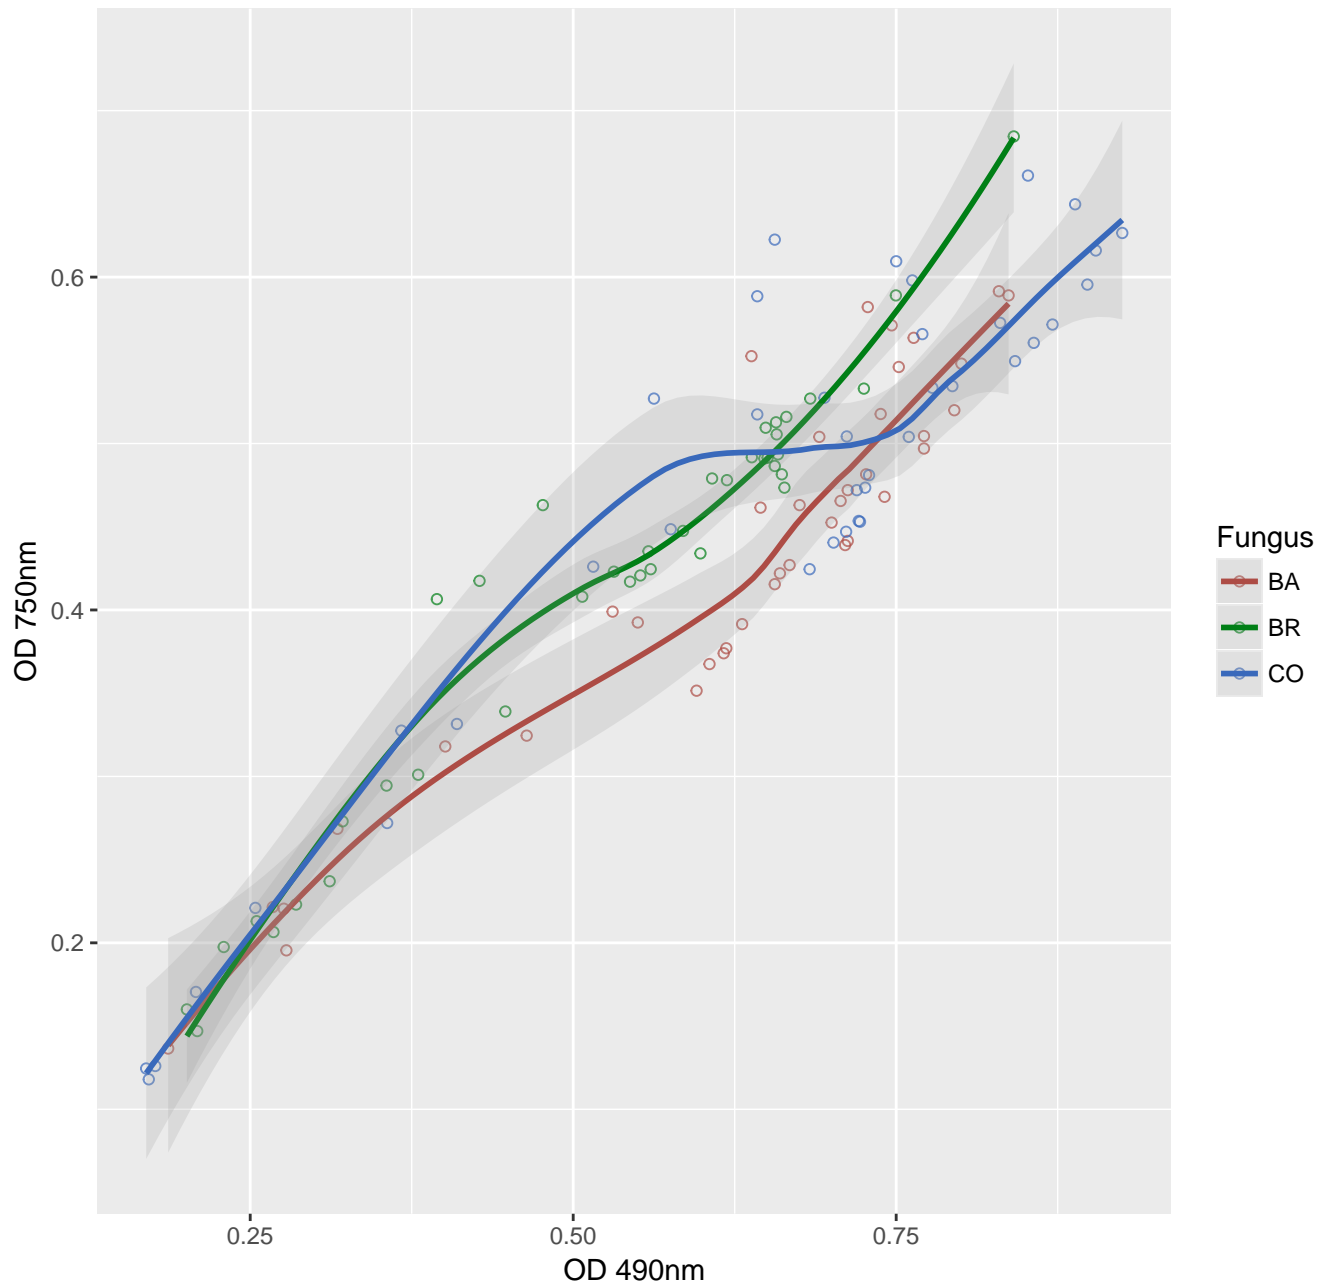

# SebacicAcid

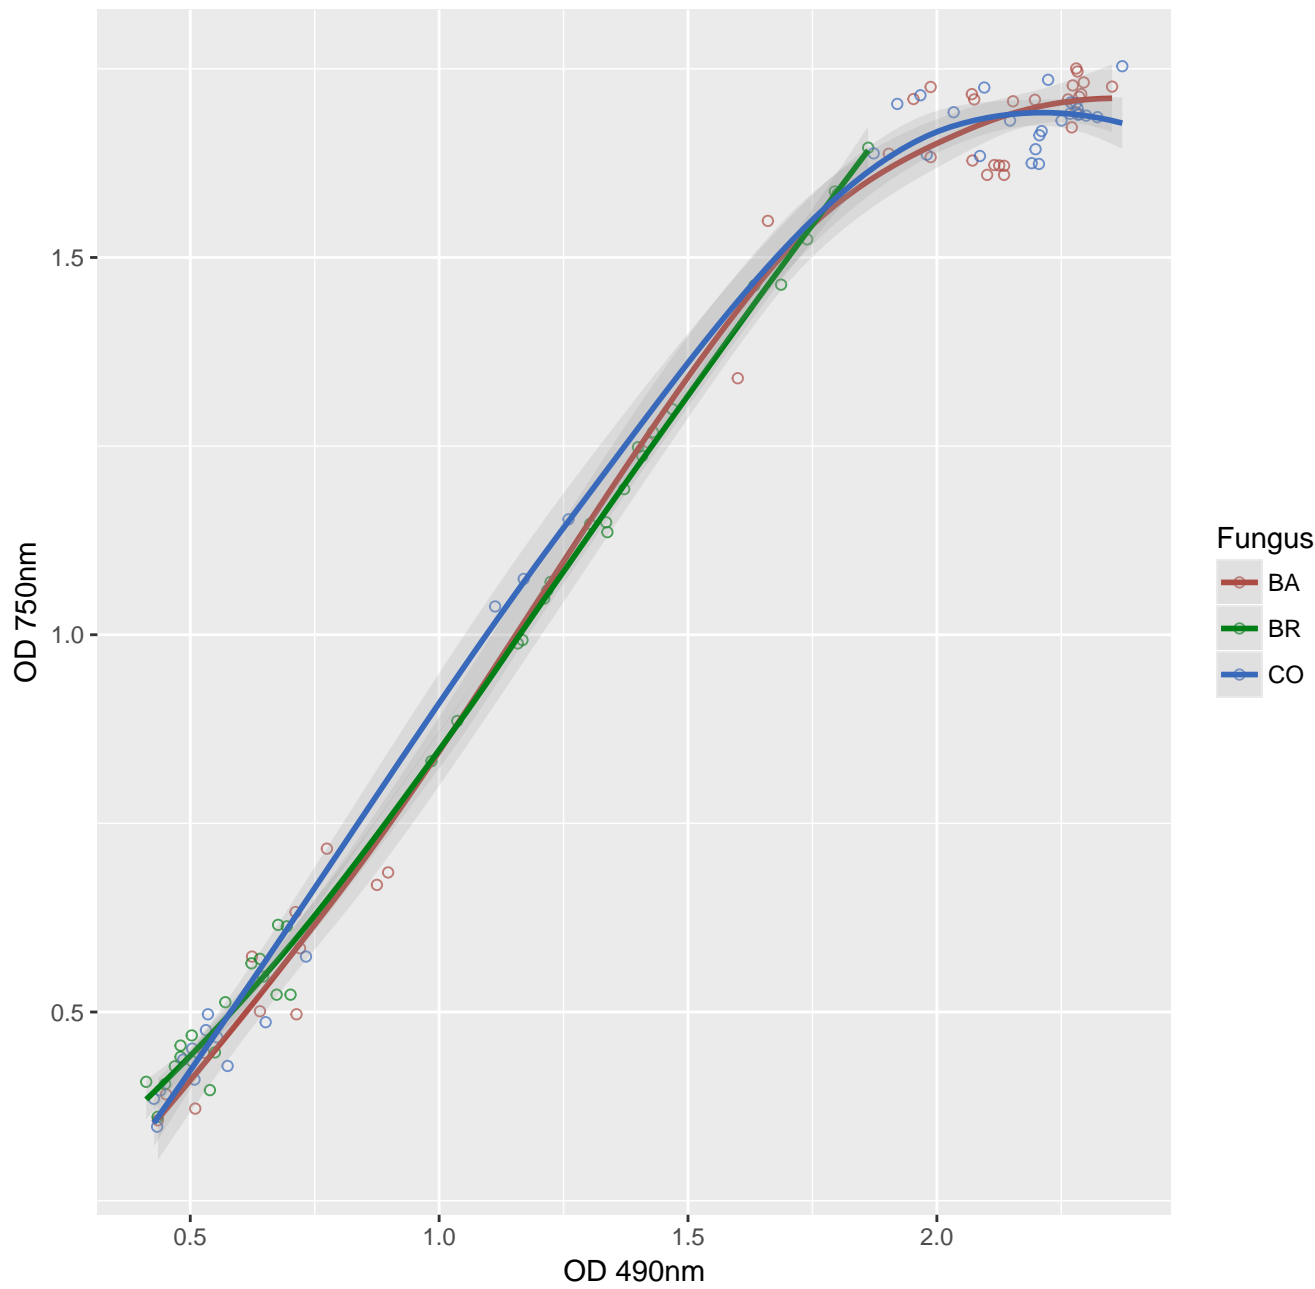



# Sedoheptulosan

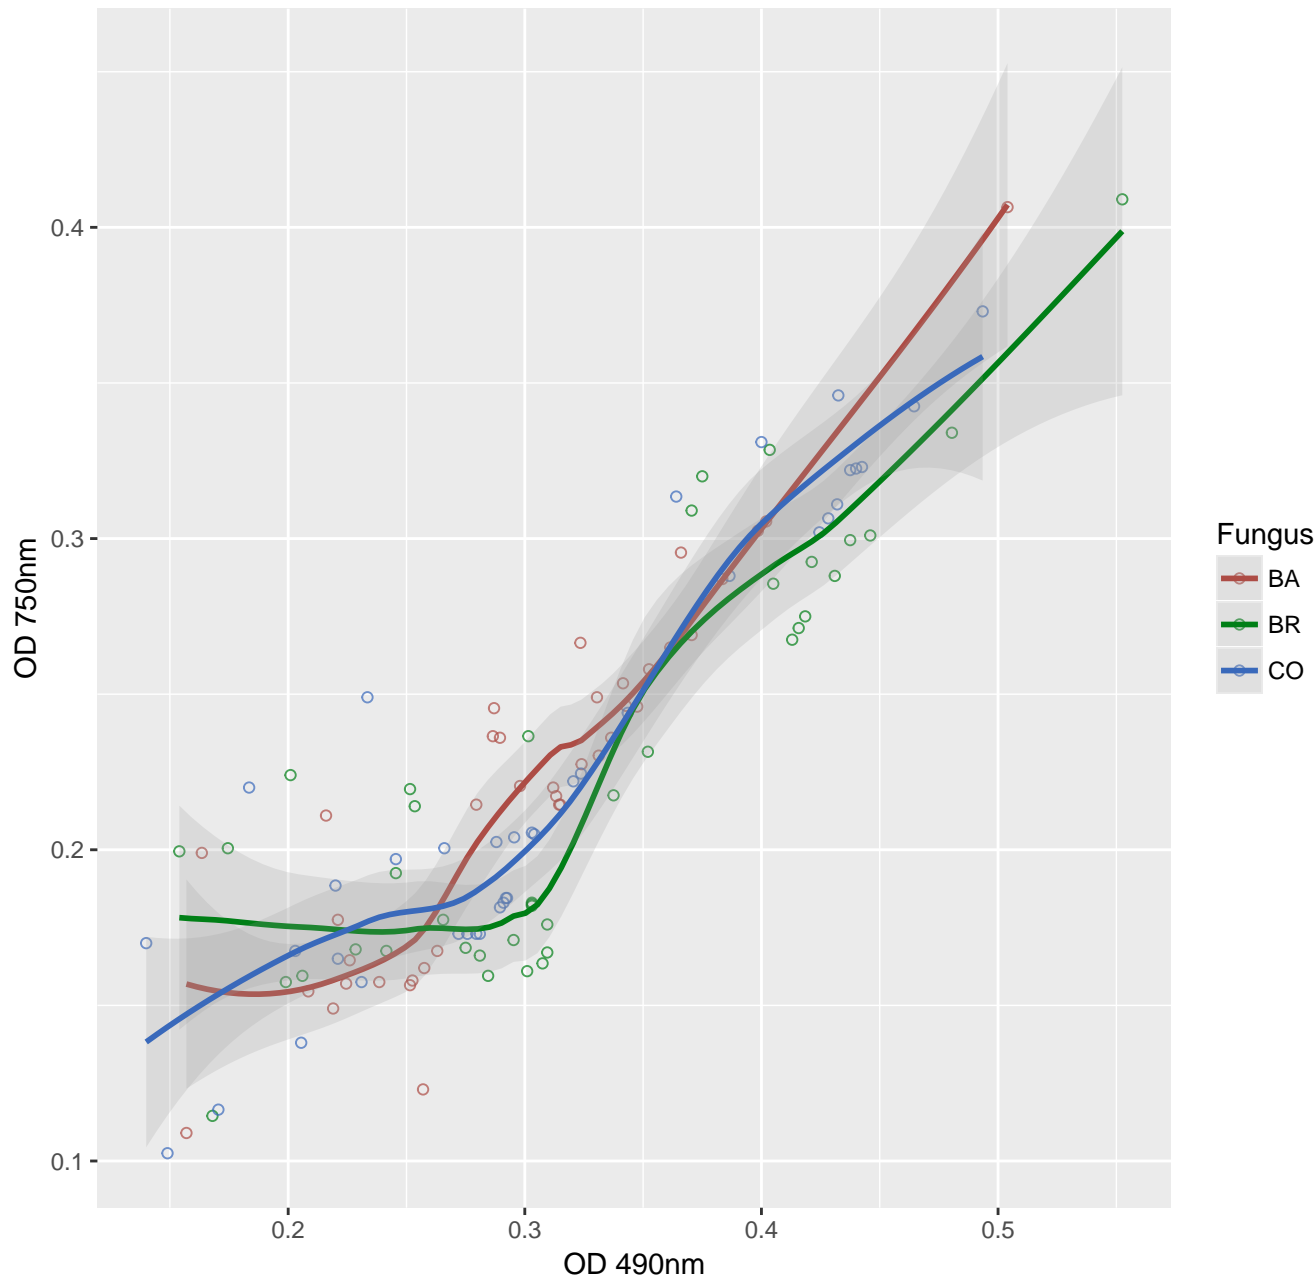

# Stachynose

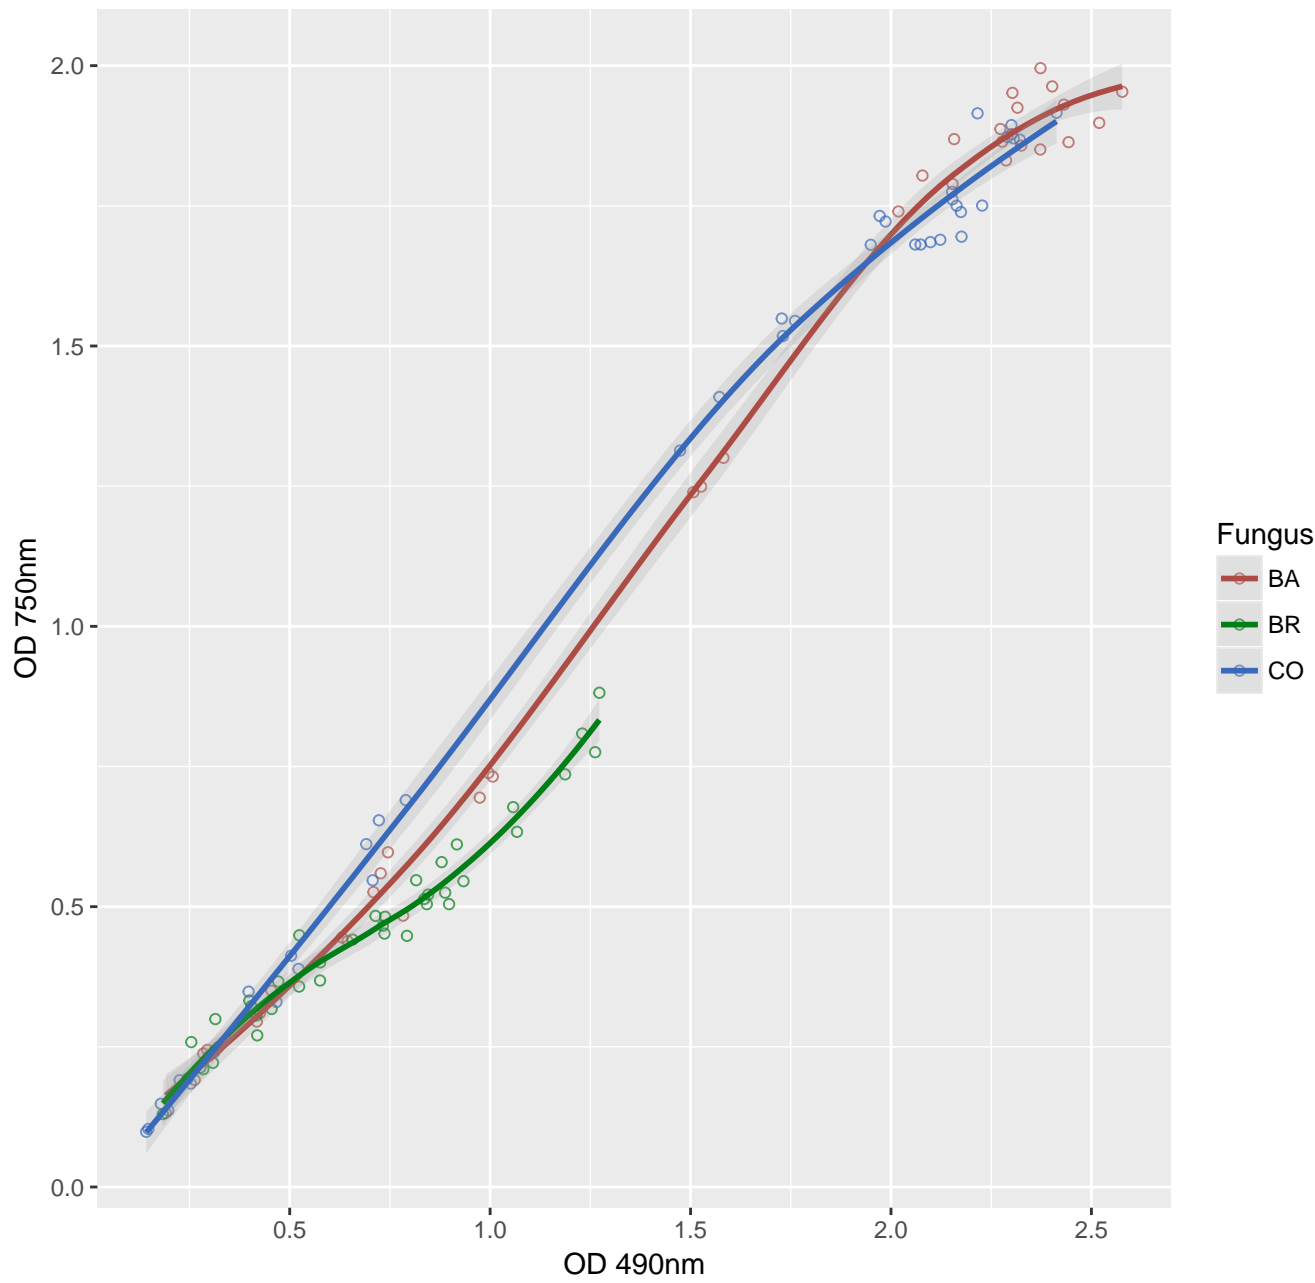

# SuccinamicAcid

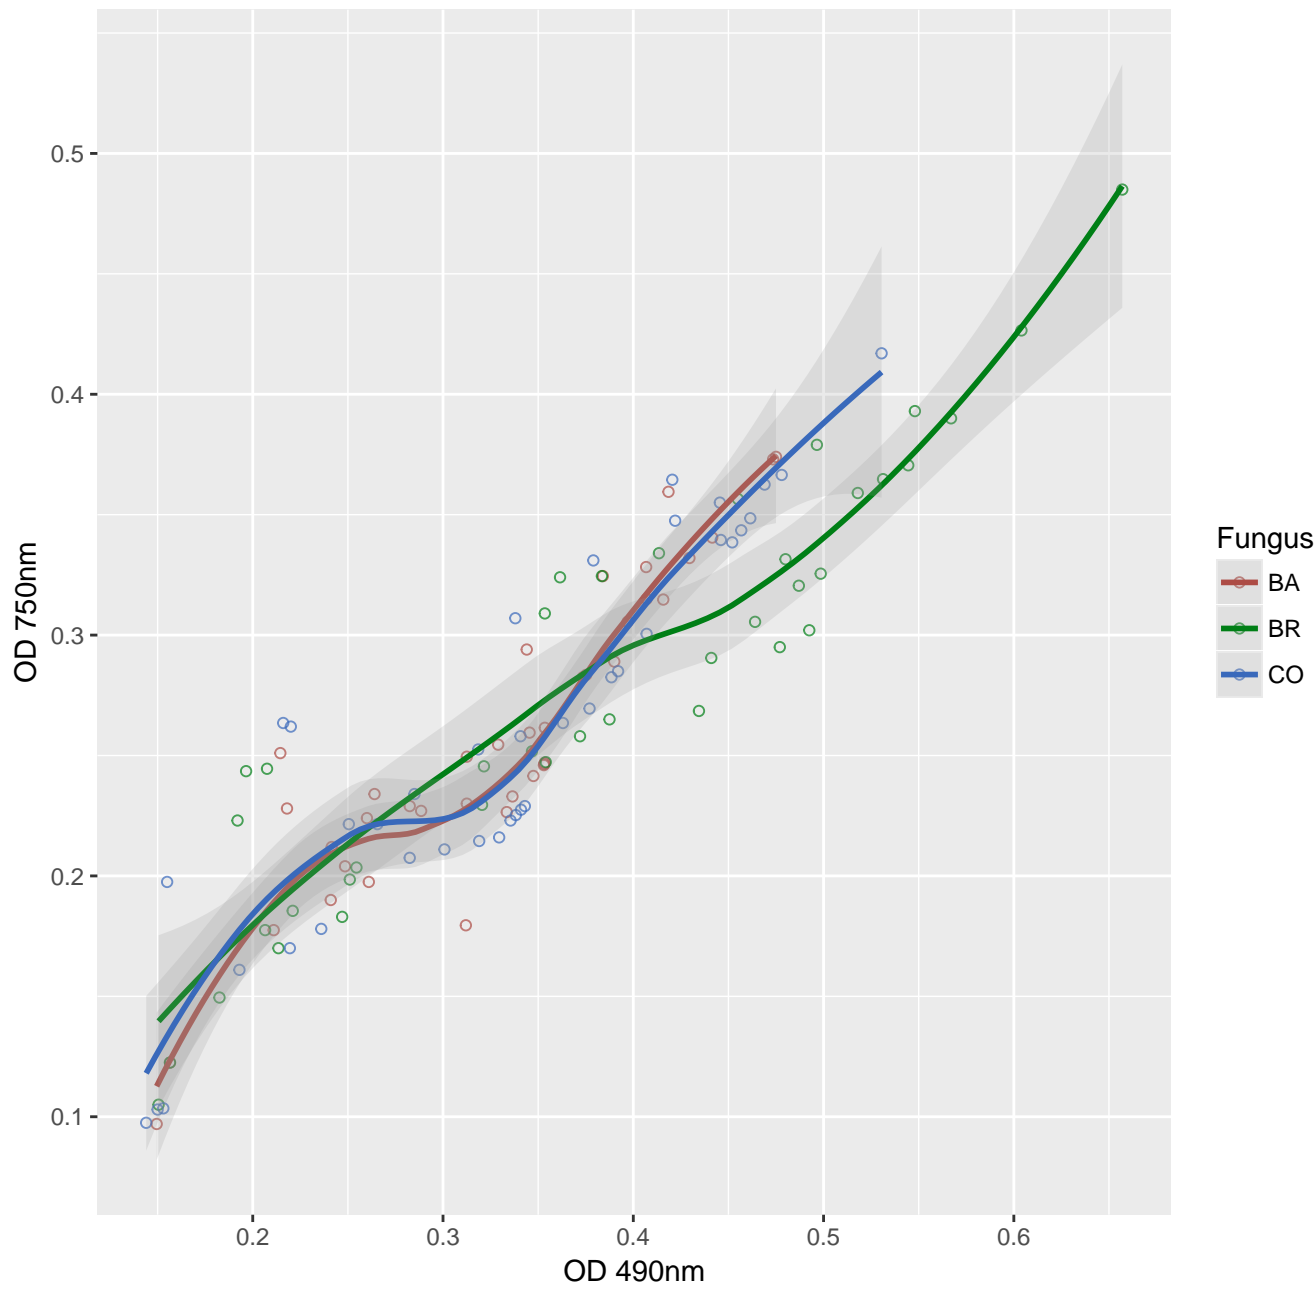

# SuccinicAcid

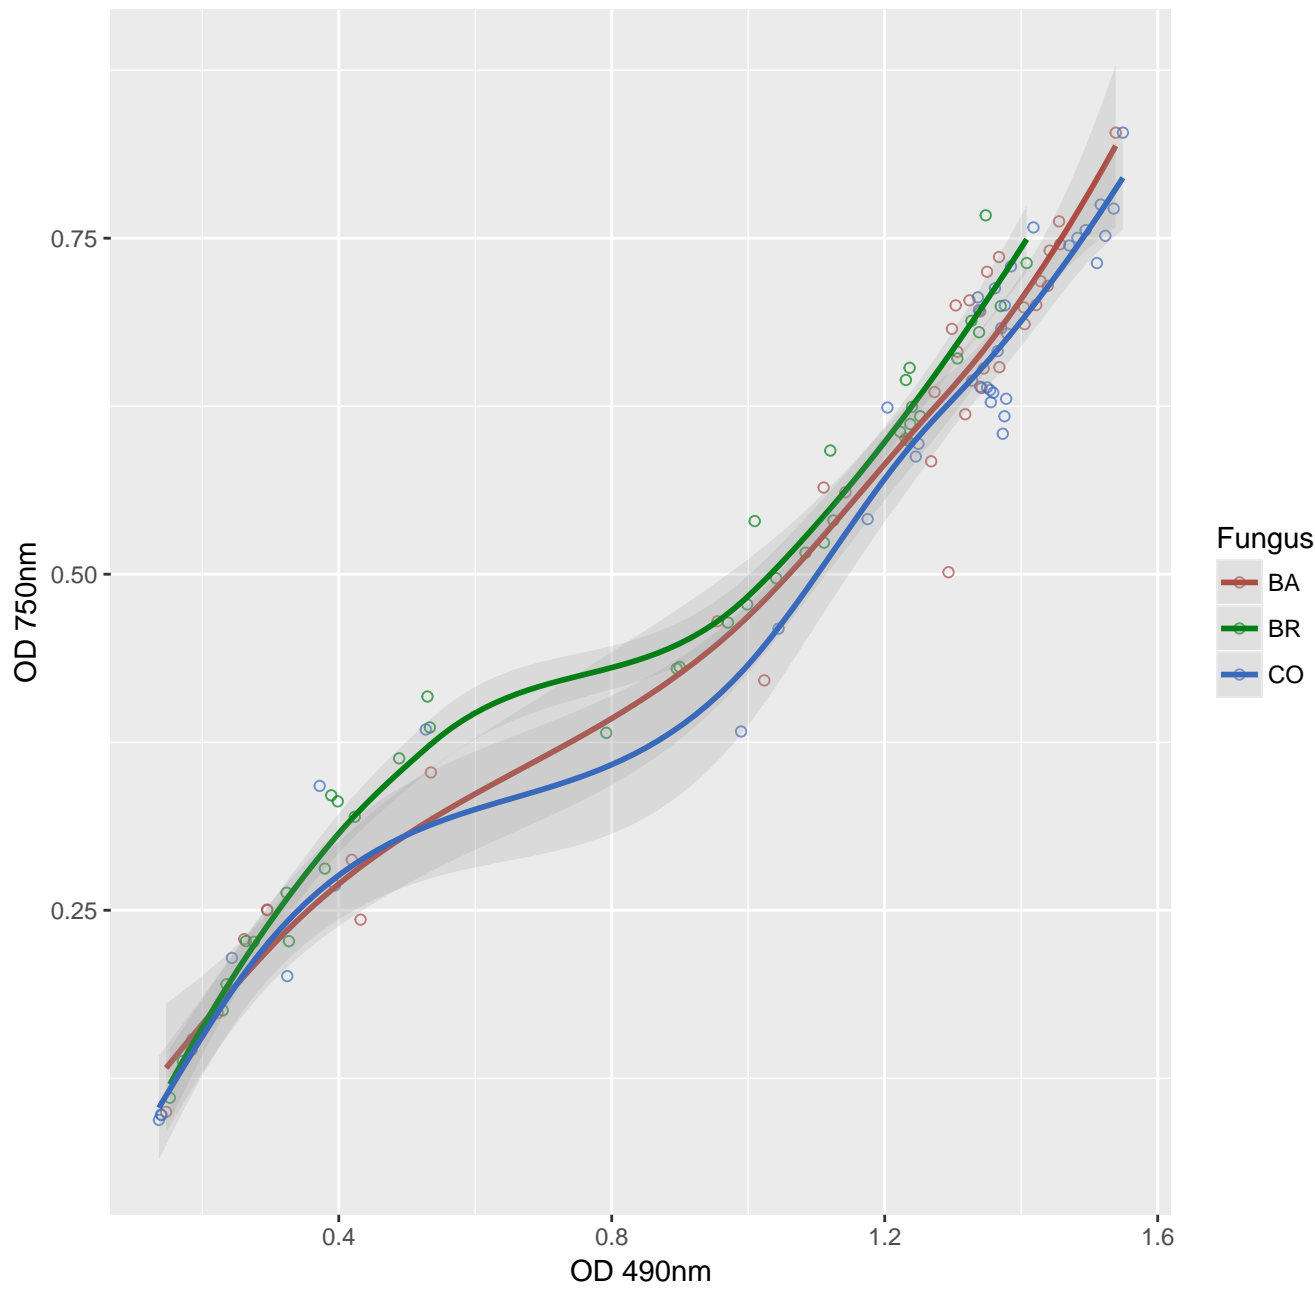

# SuccinicAcidMono.MethylEster

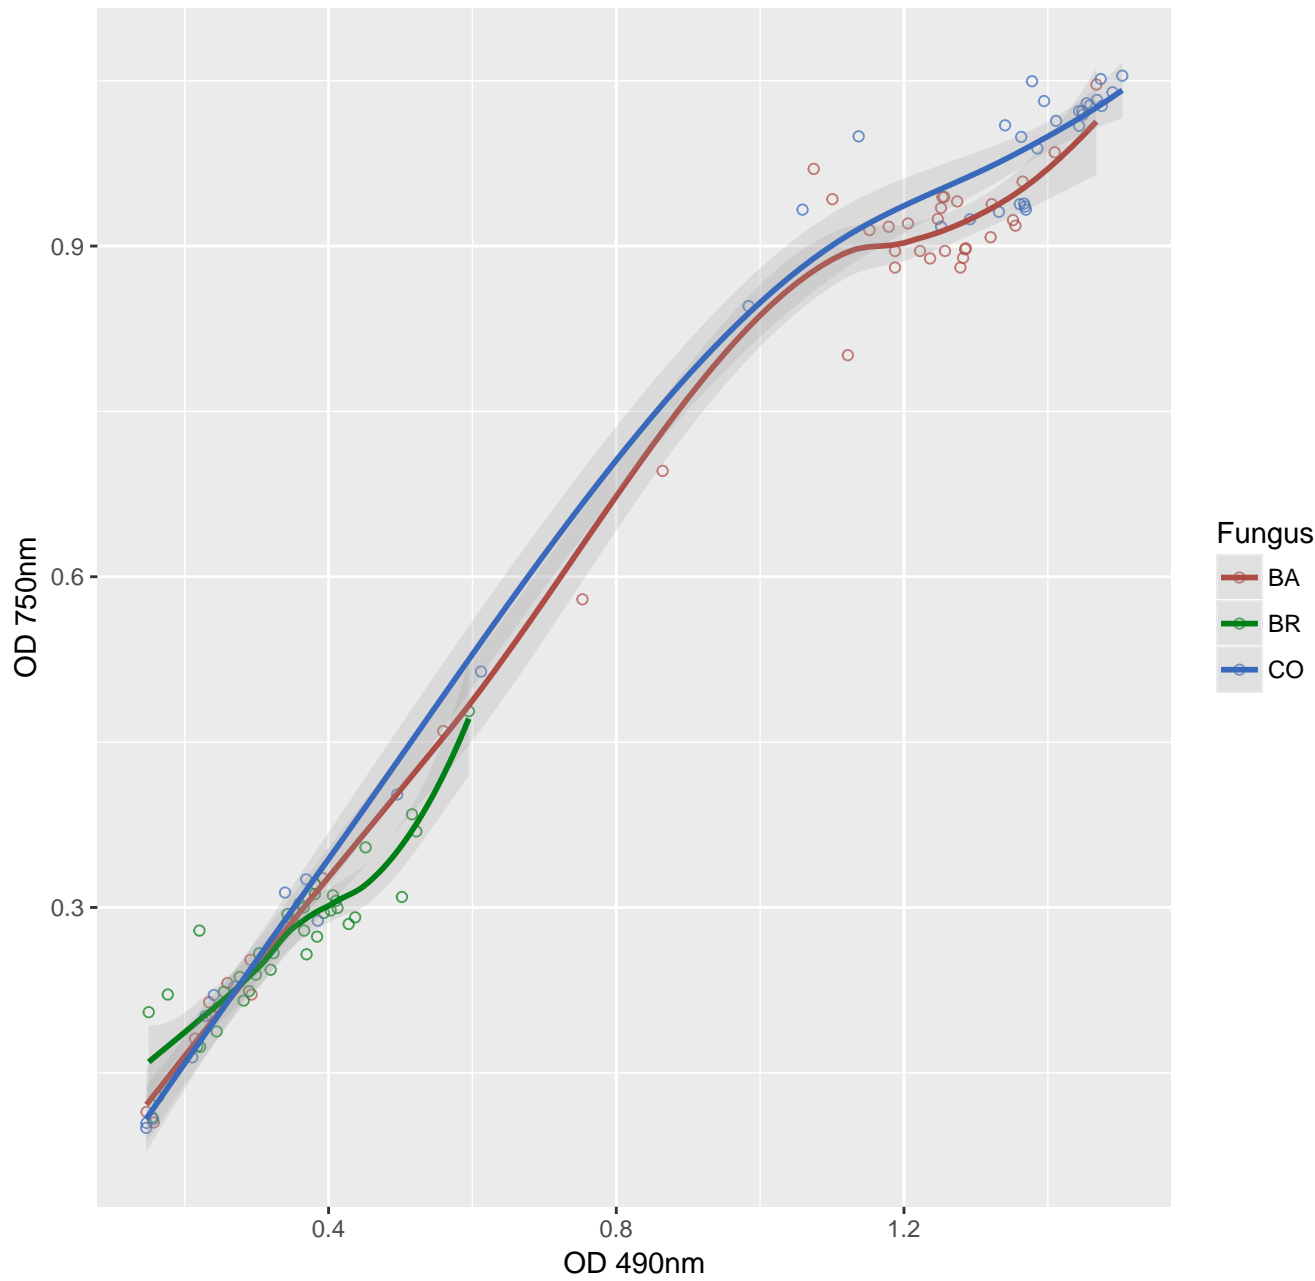

# Sucrose

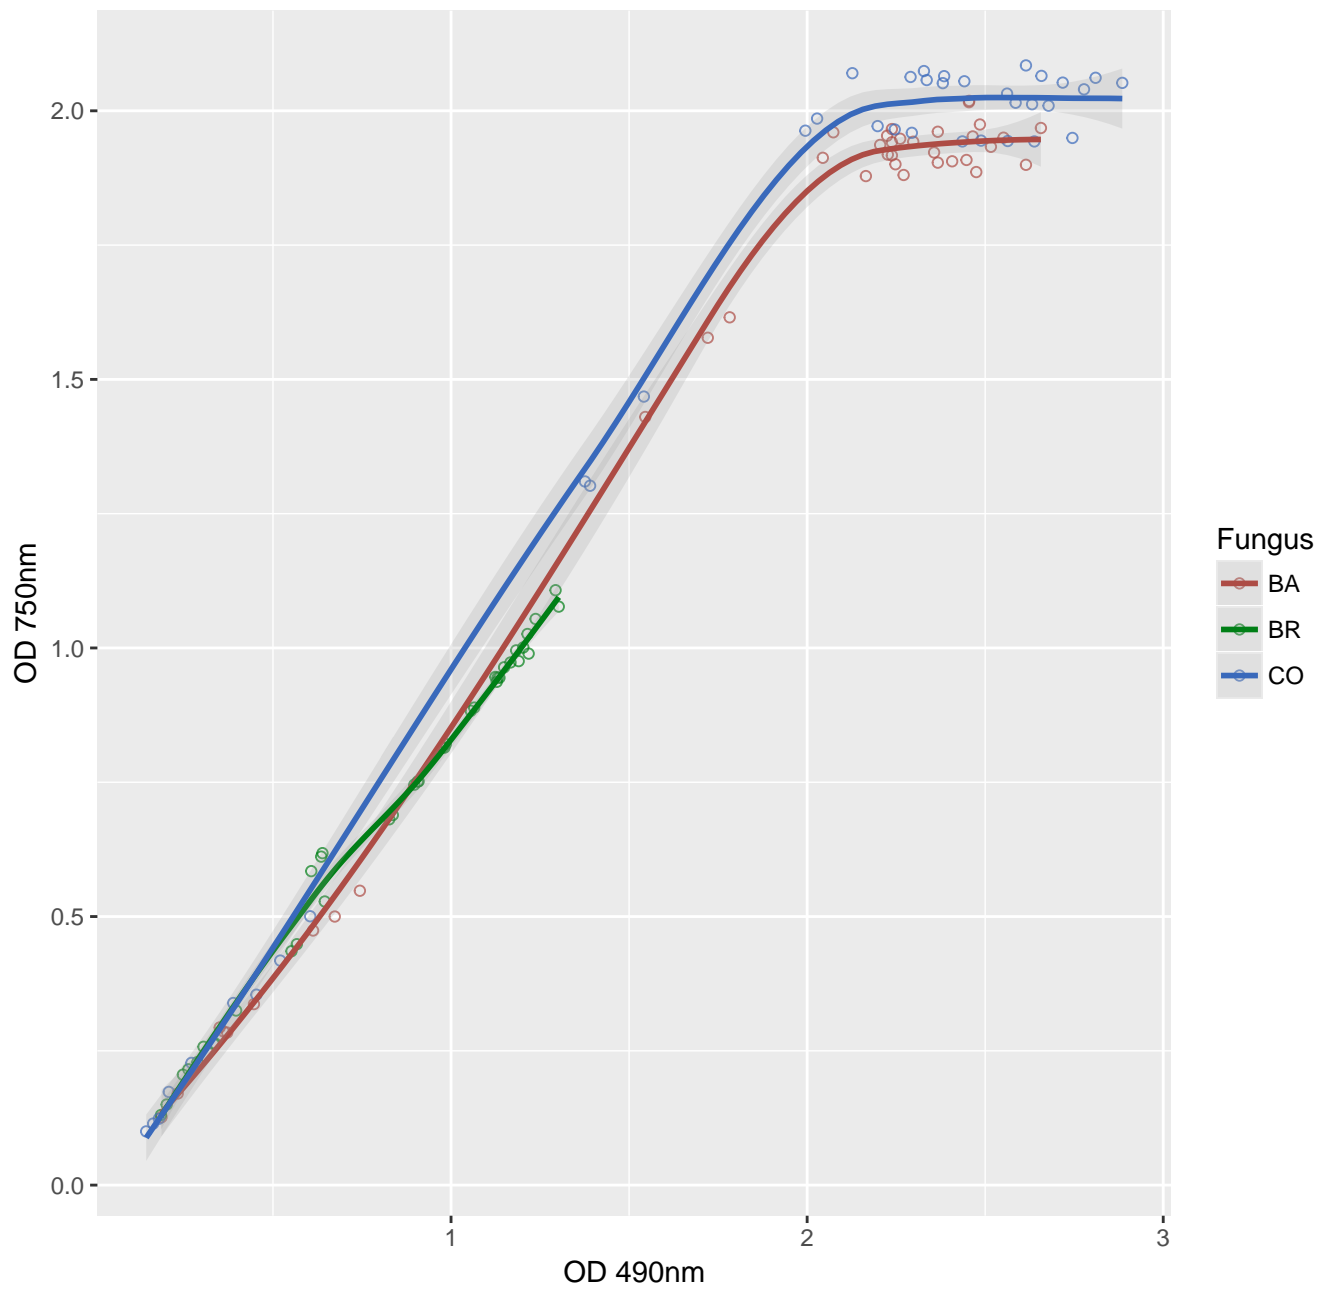

# Turanose

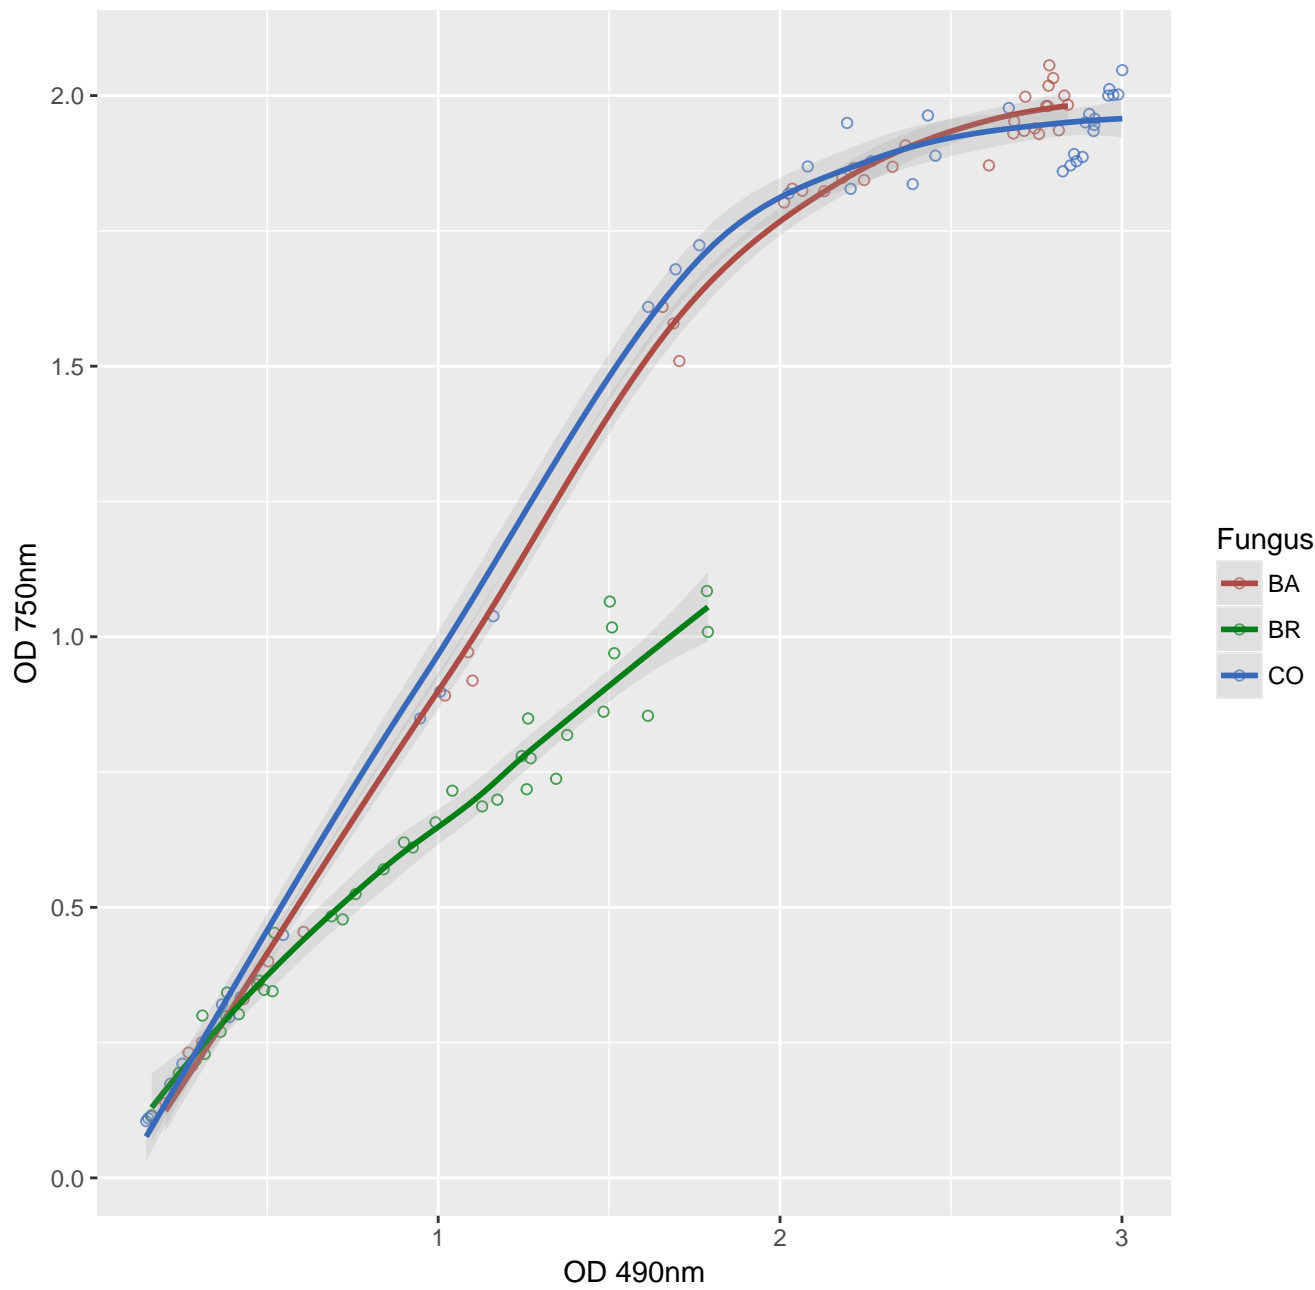

# Tween80

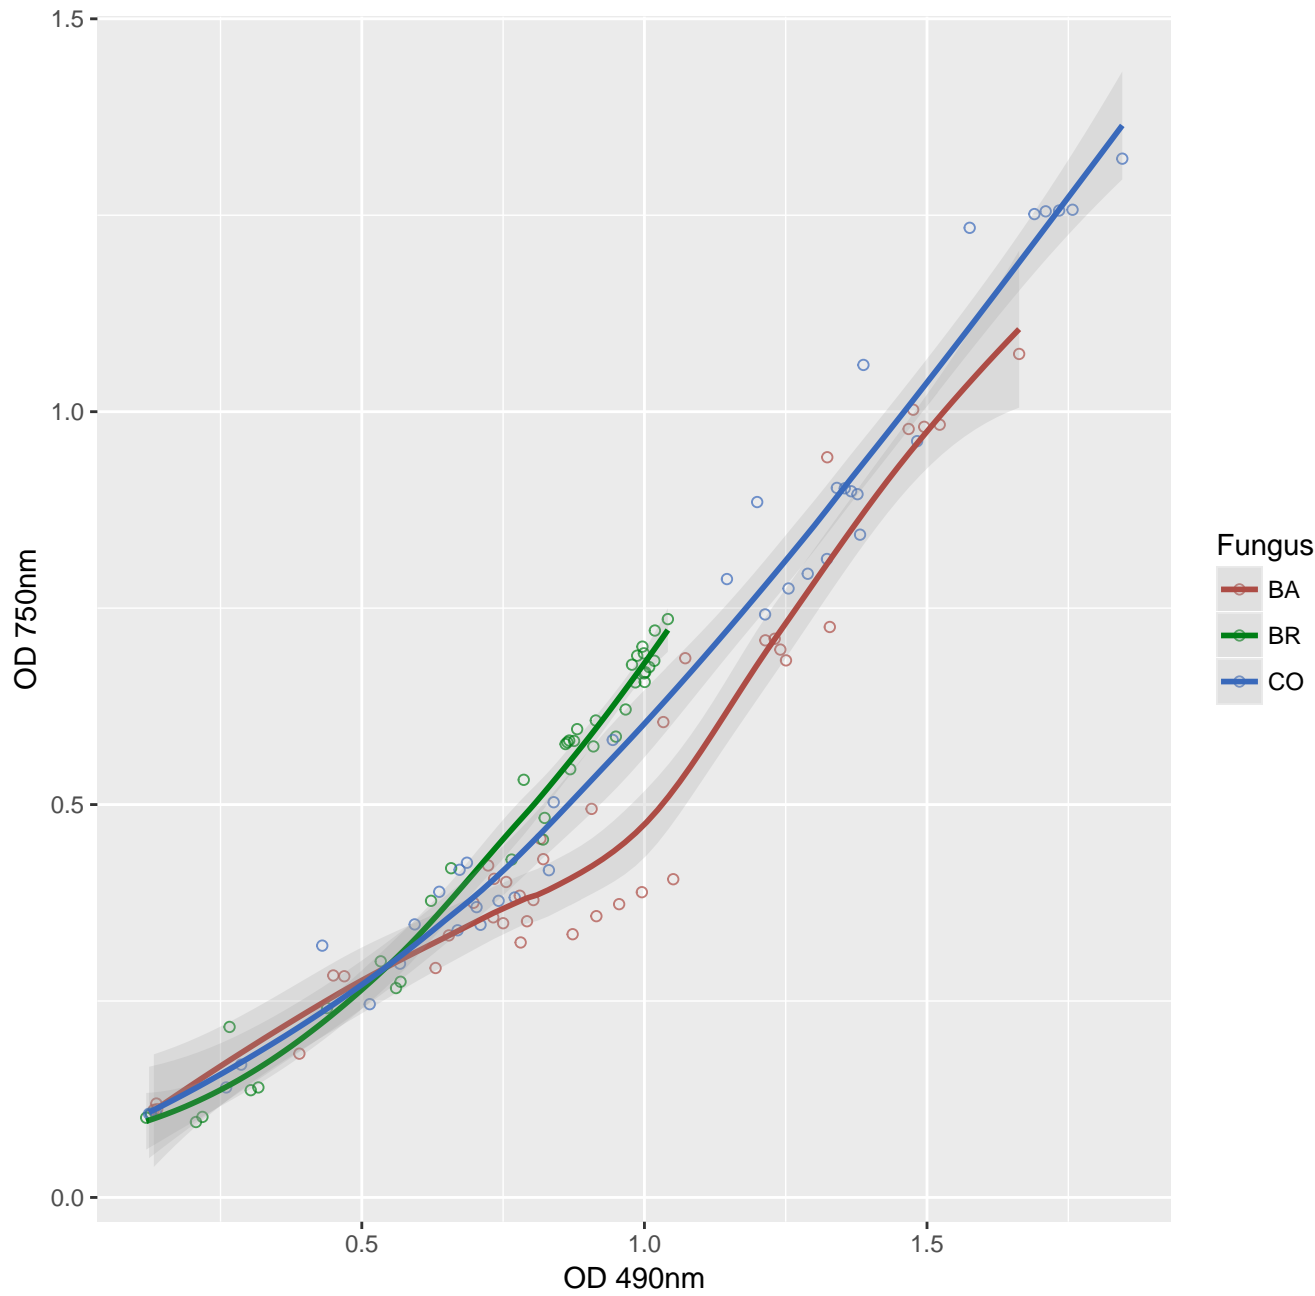



# Uridine

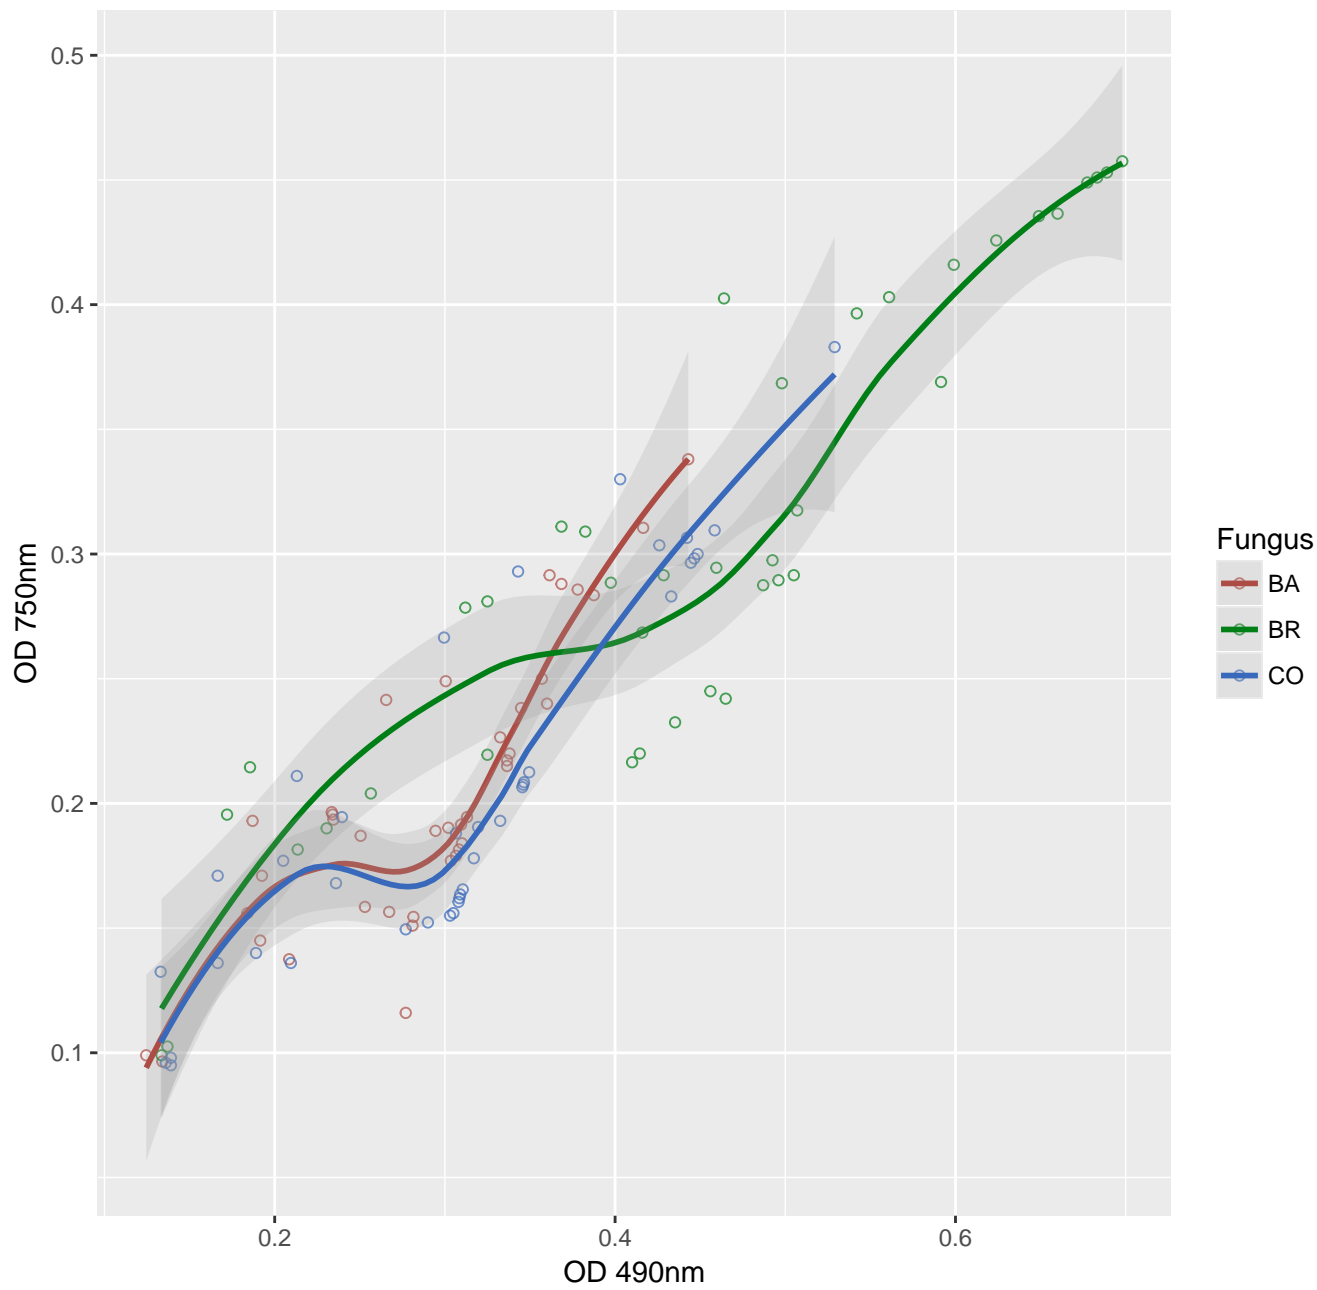

# Water

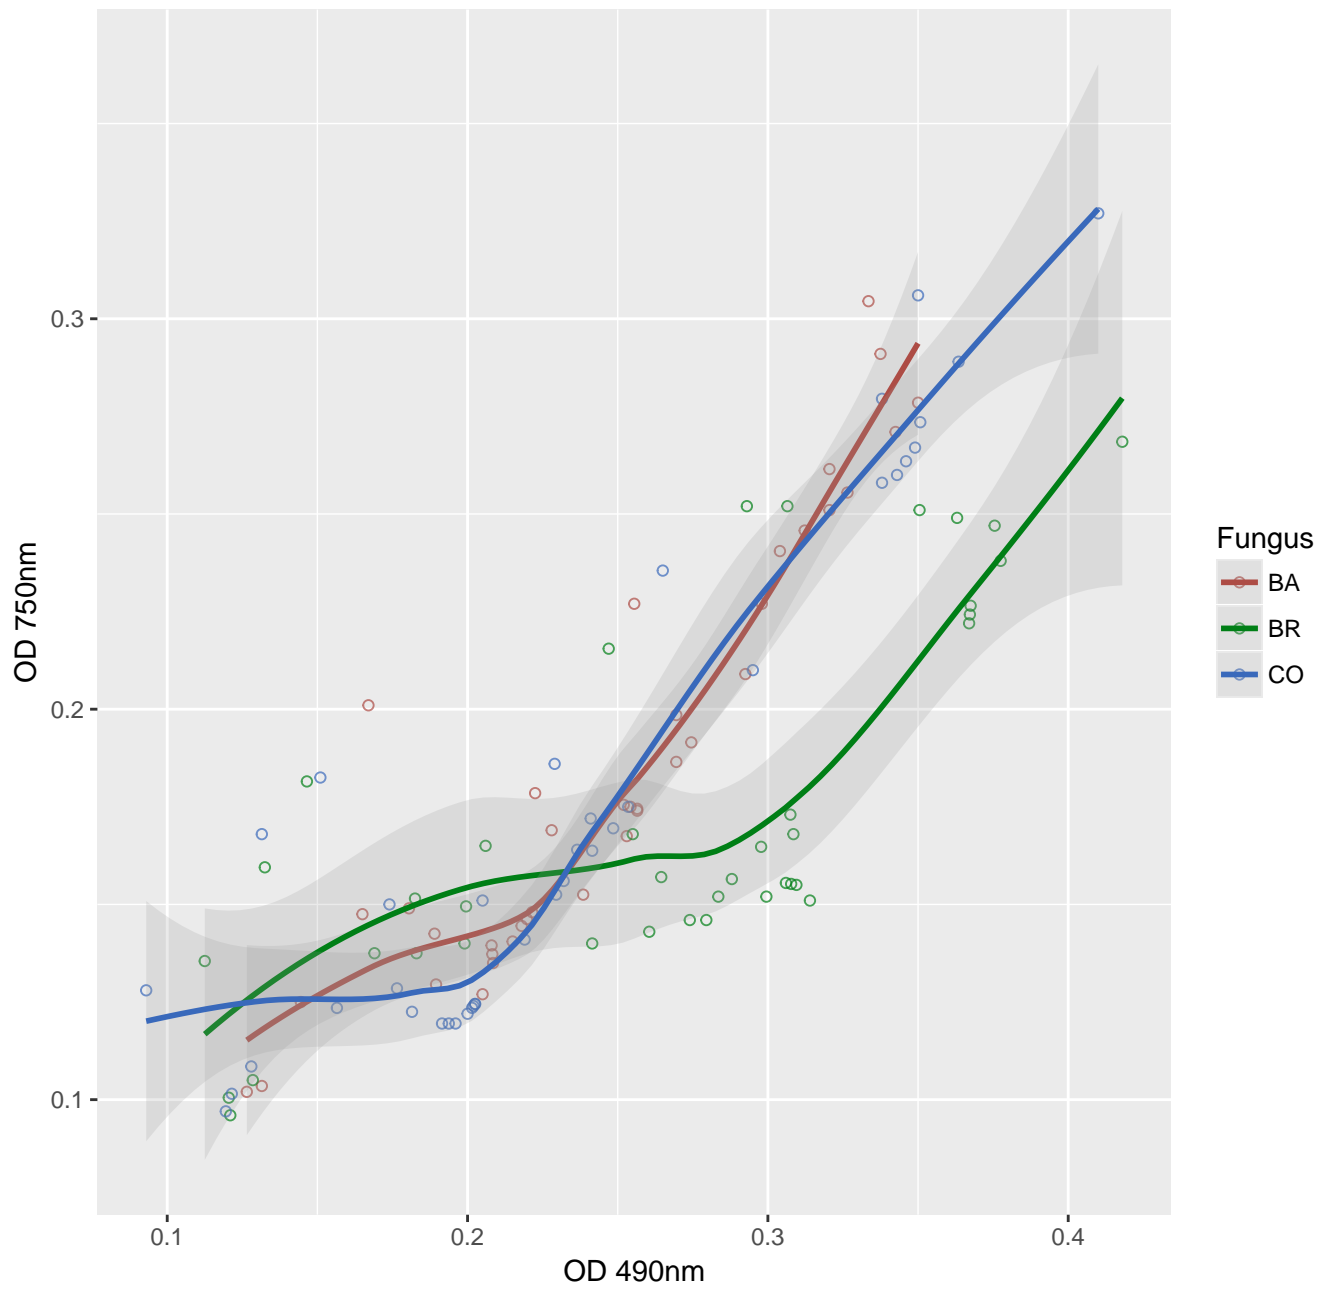

# X2.AminoEthanol

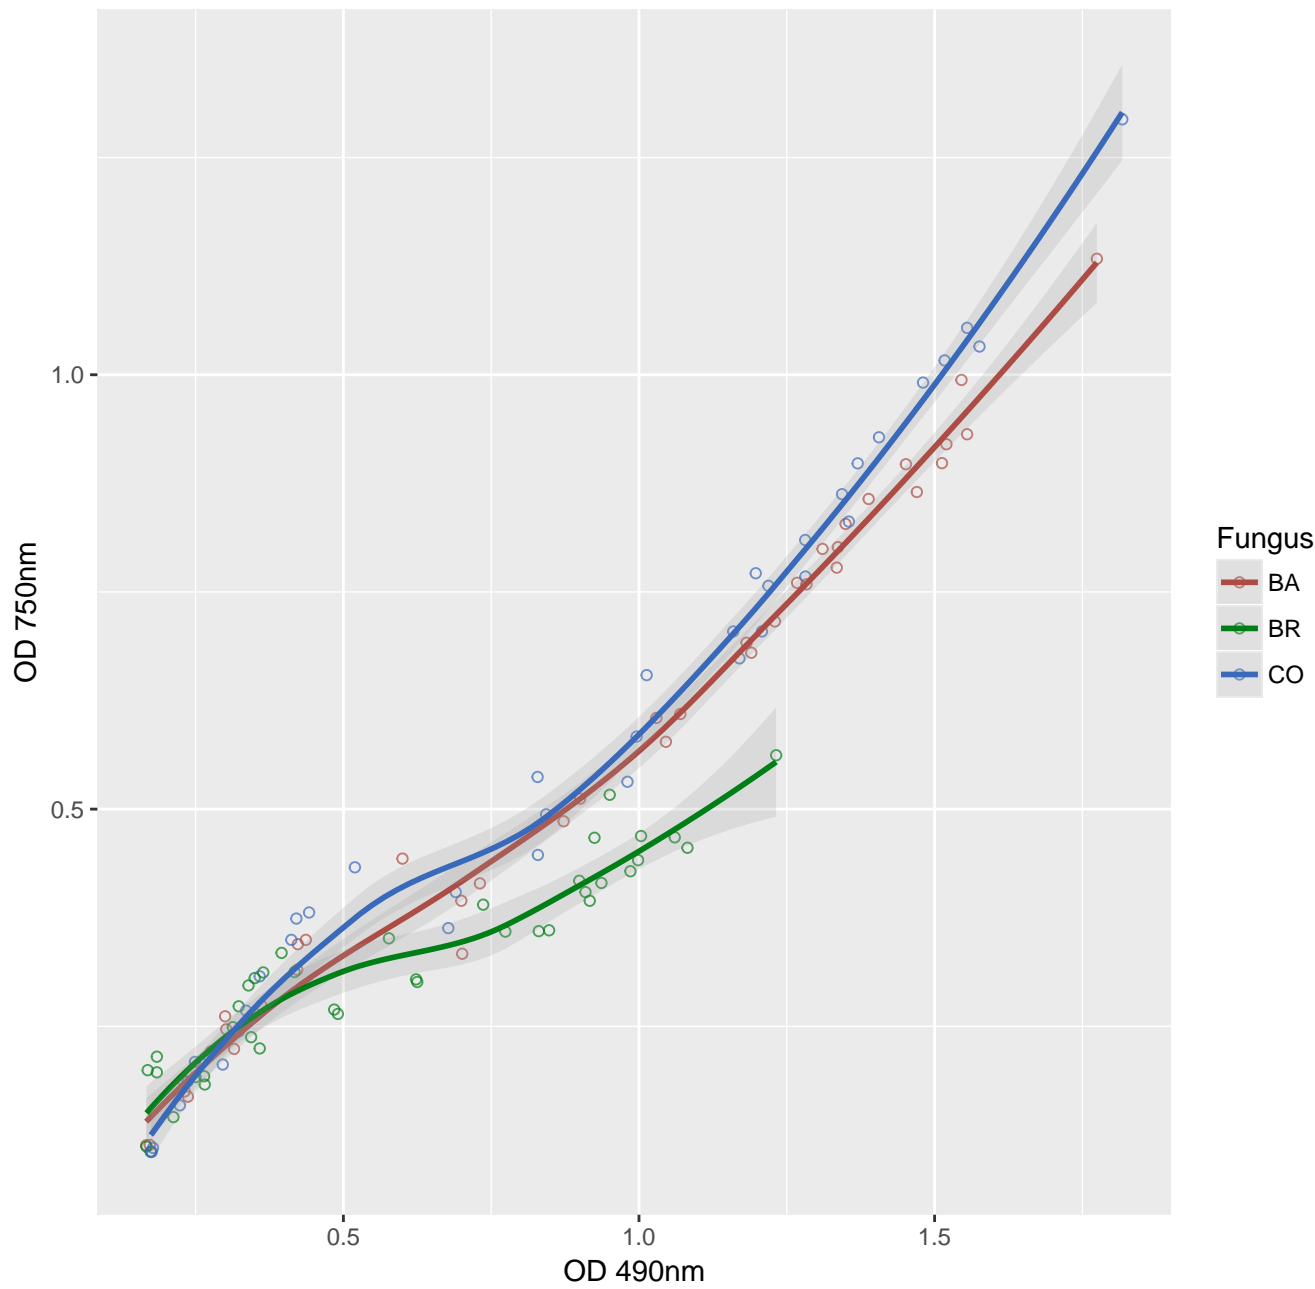

# X2.Keto.D.GluconicAcid

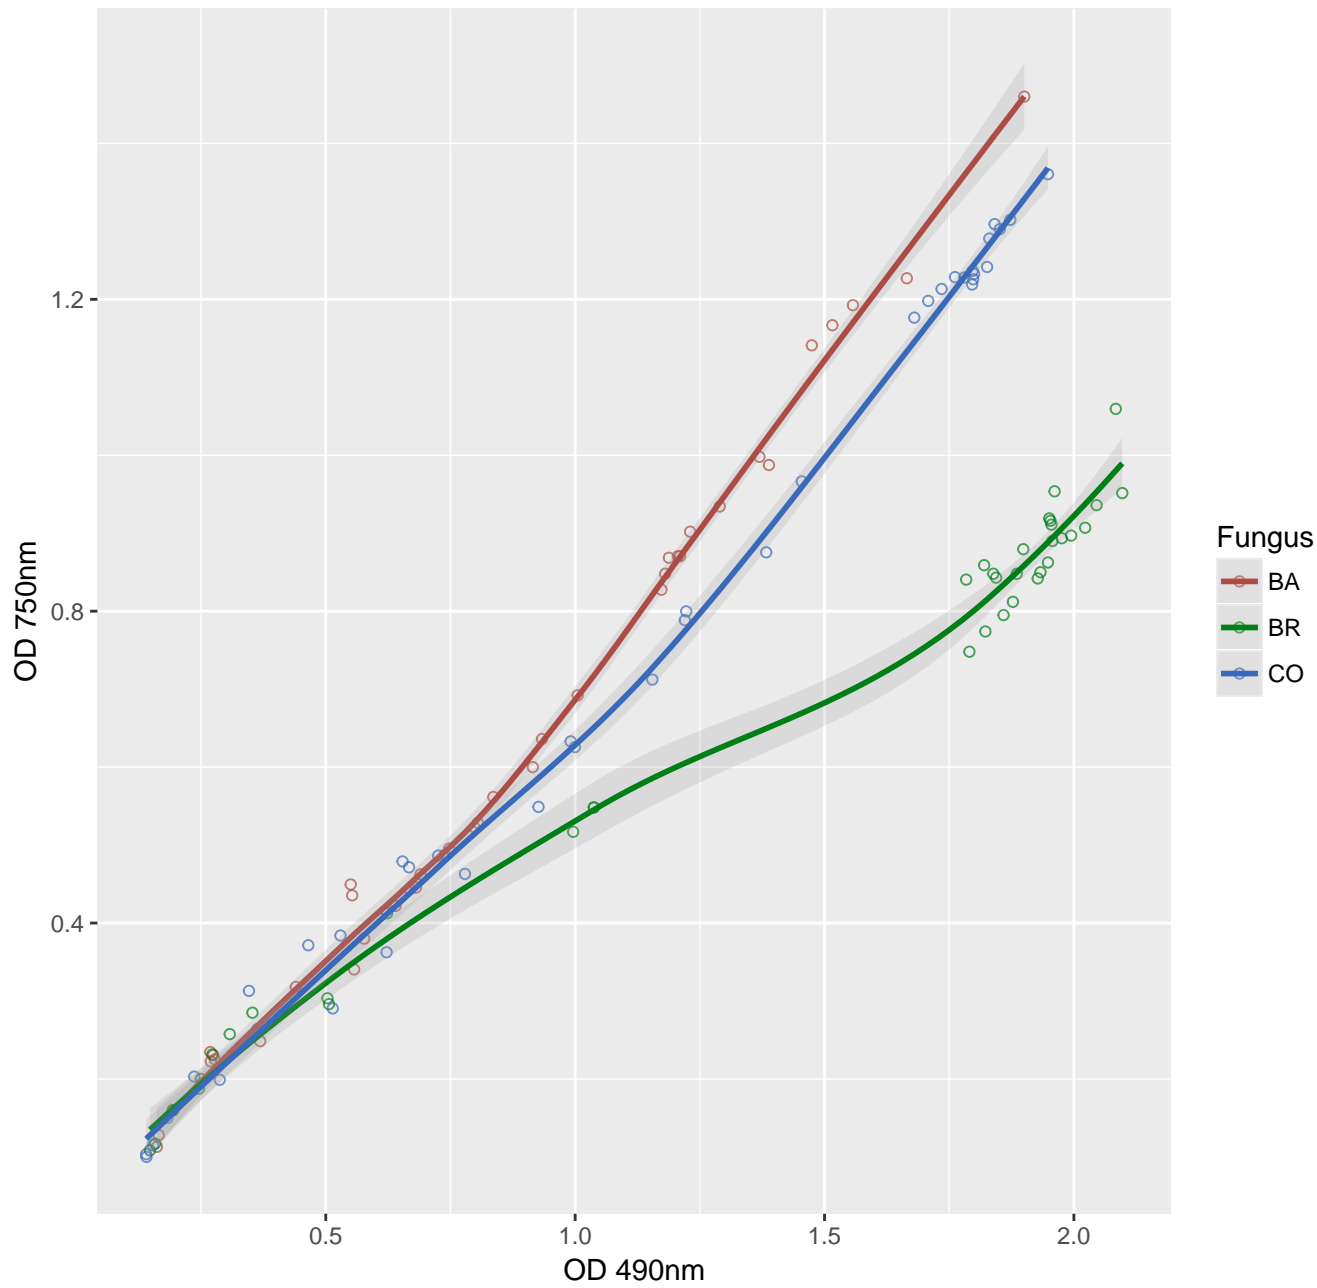

# Xylitol

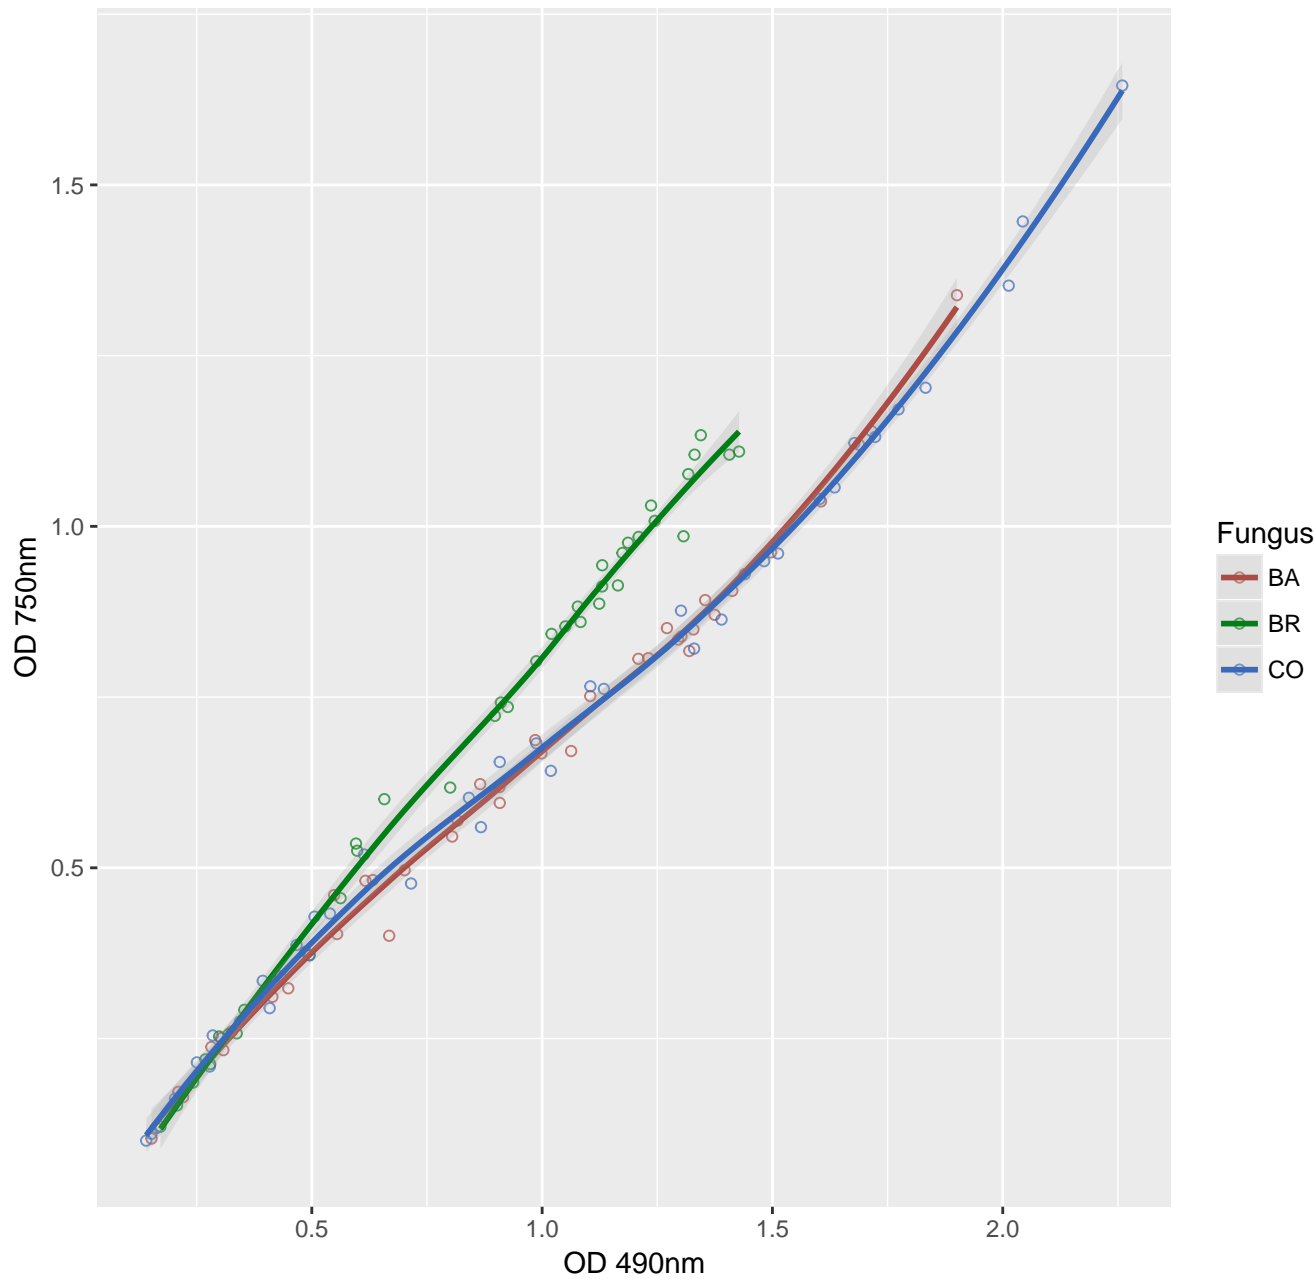

Supplement: 41598_2017_12700_MOESM1_ESM.pdf [file 41598_2017_12700_MOESM1_ESM.pdf]
